# Supplementary material
Source: PubMed Central journal article supplement (PMC3116448)

## Supporting Information

### Iron-Catalyzed Asymmetric Epoxidation of $\beta,\beta$ -Disubstituted Enones

Yasuhiro Nishikawa and Hisashi Yamamoto

Department of Chemistry, The University of Chicago

5735 S. Ellis Avenue, Chicago, Illinois, 60637 (USA)

#### Contents

|                                                                                                                     |     |
|---------------------------------------------------------------------------------------------------------------------|-----|
| 1. General Information                                                                                              | S2  |
| 2. Experimental procedure for preparation of ligand ( <b>L1-6</b> ) and characterization data                       |     |
| 2.1. <b>SI-1</b> and characterization data                                                                          | S2  |
| 2.2. <b>SI-2-5</b> and characterization data                                                                        | S3  |
| 2.3. <b>L1-6</b> and characterization data                                                                          | S4  |
| 3. Experimental procedure for preparation of starting materials <b>1a- o</b> and characterization data              | S6  |
| 4. Experimental procedure for iron-catalyzed asymmetric epoxidation and characterization data ( <b>2a-n</b> )       | S10 |
| 4.1. Another example of the iron-catalyzed asymmetric epoxidation.                                                  | S13 |
| 5. Experimental procedure for Lewis acid mediated rearrangement and characterization data ( <b>3a, 3l, and 3o</b> ) | S14 |
| 6. Experimental procedure for the synthesis of the isoxazoline <b>4a</b> and characterization data                  | S15 |
| 7. References                                                                                                       | S15 |
| 8. Complete ref 17a                                                                                                 | S16 |
| 9. X-ray crystallographic analysis of $[\text{Fe}(\mathbf{L3})_2(\text{CH}_3\text{CN})(\text{OTf})](\text{OTf})$    | S16 |
| 10. Copies of $^1\text{H-NMR}$ and $^{13}\text{C-NMR}$ spectra ( <b>SI-2-5, L1-6</b> )                              | S38 |
| 11. Copies of $^1\text{H-NMR}$ and $^{13}\text{C-NMR}$ spectra ( <b>1a-m, 1o</b> )                                  | S48 |
| 12. Copies of $^1\text{H-NMR}$ , $^{13}\text{C-NMR}$ spectra and HPLC analysis ( <b>2a-n</b> )                      | S62 |
| 13. Copies of $^1\text{H-NMR}$ , $^{13}\text{C-NMR}$ spectra and HPLC analysis ( <b>3a, 3l, 3o</b> and <b>4a</b> )  | S90 |

**1. General Information.** All reactions were carried out in flame-dried glassware under nitrogen atmosphere and stirred via magnetic stir-plates. All reactions were monitored by analytical thin-layer chromatography using Whatman pre-coated silica gel plates with F254 indicator. Visualization was accomplished by UV light (256 nm), phosphomolybdic acid, iodine, or anisaldehyde. Flash column chromatography was performed using Biotage Isolera one with Biotage SNAP cartridge KP-sil or KP-NH. All reactions were carried out with anhydrous solvents unless otherwise noted. Anhydrous acetonitrile was dried with M BRAUN solvent purification system (A2 Alumina). FeCl<sub>2</sub> and peracetic acid were purchased from Aldrich and used as received. Fe(OTf)<sub>2</sub> was purchased from Strem and used as received. All other reagents and starting materials, unless otherwise noted, were purchased from commercial vendors. Infrared spectra were recorded as thin films on sodium chloride plates using a Nicolet 20 SXB FTIR. <sup>1</sup>H NMR and <sup>13</sup>C NMR spectra were recorded on a Bruker Avance 500 (500 MHz <sup>1</sup>H, 126 MHz <sup>13</sup>C). Chemical shift values (δ) are reported using tetramethylsilane in CDCl<sub>3</sub> or residual CD<sub>2</sub>HOD (δH 3.31) and CD<sub>3</sub>OD (δC 49.15) in CD<sub>3</sub>OD or residual DMSO-*d*<sub>5</sub> (δH 2.50) and DMSO-*d*<sub>6</sub> (δC 39.51). The <sup>1</sup>H NMR spectra are reported as follows δ (number of protons, multiplicity, coupling constant *J*). Multiplicities are indicated by s (singlet), d (doublet), t (triplet), q (quartet), dd (doublet of doublet), m (multiplet) and br (broad).

## 2. Experimental procedure for preparation of ligands L1-L6 and characterization data.

### 2.1. Experimental procedure for preparation of SI-1 and characterization data.

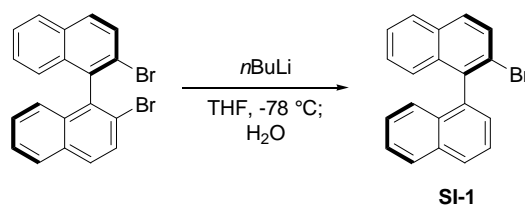

**SI-1:** **SI-1** was synthesized by modified literature procedure.<sup>1</sup> To a solution of (*R*)-2,2'-dibromo-1,1'-binaphthyl<sup>2</sup> (2.51 g, 6.09 mmol) in THF (30 mL) was added *n*-BuLi (1.6M solution in Hex, 3.8 mL, 6.1 mmol) at -78 °C. After stirring at that temperature for 1 h, the reaction was quenched by adding saturated aqueous NH<sub>4</sub>Cl, warmed up to room temperature and then diluted with EtOAc. The organic layer was separated, washed with brine, dried with Na<sub>2</sub>SO<sub>4</sub> and evaporated to give the crude product which was purified by a short pad of silica gel. The obtained oil was crystallized from hexane to furnish the title compound (87%) concomitant with a small amount of 1,1'-binaphthyl as white-pink crystal. <sup>1</sup>H-NMR (CDCl<sub>3</sub>) 8.00 (1H, d, *J*=8.5), 7.97 (1H, d, *J*=8.5), 7.91 (1H, d, *J*=8.0), 7.83 (1H, d, *J*=8.5), 7.80 (1H, d, *J*=8.5), 7.64 (1H, dd, *J*=8.3, 7.3), 7.49 (2H, m), 7.41 (1H, dd, *J*=7.0, 1.0), 7.31 (1H, ddd, *J*=8.3, 7.0, 1.0), 7.27 (1H, m), 7.22 (1H, d, *J*=8.5), 7.18 (1H, d, *J*=8.5). <sup>13</sup>C NMR (CDCl<sub>3</sub>) δ 138.1, 137.3, 134.4, 133.6, 132.3, 132.0, 129.9, 129.3, 128.3, 127.95, 127.92, 126.9, 126.8, 126.3, 126.1, 126.0, 125.7, 125.5, 122.7.

## 2.2. General procedure for preparation of SI-2-5 and characterization data.

To a mixture of 3,8-dibromophenanthroline<sup>3</sup> (676 mg, 2.0 mmol), Pd(PPh<sub>3</sub>)<sub>4</sub> (347 mg, 0.3 mmol), and a corresponding boronic acid (5.0 mmol) were added a degassed mixture of THF (14 mL) and toluene (14 mL) at room temperature under nitrogen atmosphere. After the addition of a degassed aq. Na<sub>2</sub>CO<sub>3</sub> (1 M solution, 5.0 mL, 5.0 mmol), the reaction mixture was heated to reflux for 18 h. After cooling to room temperature, the reaction was poured into 1 M aqueous NaOH (20 mL) and extracted three times with CH<sub>2</sub>Cl<sub>2</sub>. The organic layer was dried with Na<sub>2</sub>SO<sub>4</sub> and evaporated to give the crude product which was purified by silica gel chromatography. The obtained oil was crystallized from hexane/EtOAc to furnish a desired product.

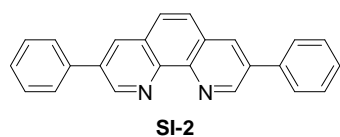

**SI-2**<sup>4</sup>: 81% yield as a white solid, m.p. 186-190 °C (CH<sub>2</sub>Cl<sub>2</sub>), lit.<sup>4</sup> m.p. 190-191 °C (benzene-petroleum ether); <sup>1</sup>H NMR (CDCl<sub>3</sub>) δ 9.45 (2H, d, *J* = 2.0 Hz), 8.41 (2H, t, *J* = 1.9 Hz), 7.89 (2H, d, *J* = 1.6 Hz), 7.80 (4H, d, *J* = 8.2 Hz), 7.57 (4H, t, *J* = 7.6 Hz), 7.48 (2H, t, *J* = 7.1 Hz); <sup>13</sup>C NMR (CDCl<sub>3</sub>) δ 149.5, 145.1, 137.6, 135.8, 133.4, 129.2, 128.5, 128.4, 127.6, 127.1; IR (neat) 2362, 2338, 1653, 1600, 1558, 1443, 1426, 1274, 908, 761, 724, 699 cm<sup>-1</sup>; MS (ESI<sup>+</sup>) *m/z* (%): 665 ([2M+H]<sup>+</sup>, 30), 333 ([M+H]<sup>+</sup>, 100).

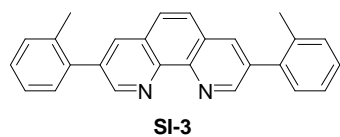

**SI-3**: 61 % as white crystal, m.p. 157-160 °C; <sup>1</sup>H NMR (CDCl<sub>3</sub>) δ 9.22 (2H, d, *J* = 2.2 Hz), 8.22 (2H, d, *J* = 2.2 Hz), 7.88 (2H, s), 7.36-7.45 (8H, m), 2.38 (6H, s); <sup>13</sup>C NMR (CDCl<sub>3</sub>) δ 151.2, 144.8, 137.9, 136.8, 135.9, 135.5, 130.7, 130.2, 128.4, 128.1, 126.9, 126.2, 20.5; IR (neat) 3017, 2959, 1559, 1457, 1423, 918, 757 cm<sup>-1</sup>; MS (ESI<sup>+</sup>) *m/z* (%): 361 ([M+H]<sup>+</sup>, 100).

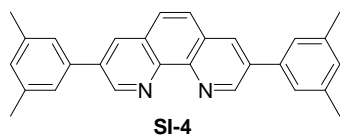

**SI-4**: 66% yield as yellow solid, m.p. 208-212 °C; <sup>1</sup>H NMR (CDCl<sub>3</sub>) δ 9.42 (2H, d, *J* = 2.3 Hz), 8.39 (2H, d, *J* = 2.2 Hz), 7.88 (2H, s), 7.40 (4H, s), 7.12 (2H, s), 2.46 (12H, s); <sup>13</sup>C NMR (CDCl<sub>3</sub>) δ 149.6, 145.0, 138.8, 137.5, 135.9, 133.3, 130.0, 128.4, 127.0, 125.4, 21.4; IR (neat) 3030, 2917, 2860, 1603, 1435, 1366, 1221, 1038, 849, 736, 699 cm<sup>-1</sup>; MS (ESI<sup>+</sup>) *m/z* (%): 777 ([2M+H]<sup>+</sup>, 50), 389 ([M+H]<sup>+</sup>, 100).

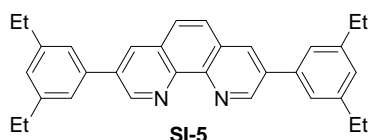

**SI-5**: 54 % yield as a brown solid, m.p. 132-134 °C; <sup>1</sup>H NMR (CDCl<sub>3</sub>) δ 9.43 (2H, d, *J* = 2.2 Hz), 8.38 (2H, d, *J* = 2.1 Hz), 7.87 (2H, s), 7.43 (4H, s), 7.16 (2H, s), 2.77 (8H, q, *J* = 7.6), 1.34 (12H, t, *J* = 7.6 Hz); <sup>13</sup>C NMR (CDCl<sub>3</sub>) δ 149.7, 145.3, 145.0, 137.7, 136.1, 133.3, 128.4, 127.6, 127.0, 124.6, 28.9, 15.7; IR (neat) 3023, 2963, 2931, 2871, 1600, 1423, 1370, 868, 736, 705 cm<sup>-1</sup>; MS (ESI<sup>+</sup>) *m/z* (%): 445 ([M+H]<sup>+</sup>, 100).

### 2.3. Representative procedure for the preparation of L1-6 and characterization data.

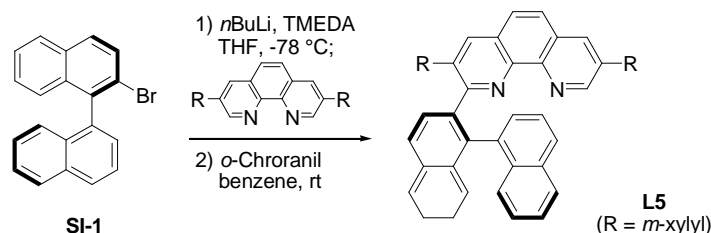

To a solution of **SI-1** (858 mg, 2.57 mmol) in THF (13 mL) was added TMEDA (0.44 mL, 2.9 mmol) at room temperature. After cooling to -78 °C, *n*-BuLi (1.6 M solution in Hex, 1.8 mL, 2.9 mmol) was added dropwise to the mixture which was stirred at that temperature for 1 h. To this solution was added a THF solution (26 mL in 2 portions) of **SI-4** (1.50 g, 3.86 mmol) which was pre-dried by azeotropic removal of water with toluene. Warmed up to room temperature overnight, the reaction was further stirred for 12 h at room temperature. The reaction was quenched by adding water and extracted three times with CH<sub>2</sub>Cl<sub>2</sub> and the combined organic layers were dried with Na<sub>2</sub>SO<sub>4</sub> and evaporated. To the obtained residue in benzene (20 mL) was added a solution of *o*-chloranil (696 mg, 2.83 mmol) in benzene (6 mL) at room temperature. After stirring at the same temperature for 2 h, the reaction was quenched by adding 1 M aqueous NaOH solution. The mixture was filtered with celite, and the filtrate was extracted three times with CH<sub>2</sub>Cl<sub>2</sub>. The combined organic layers were dried over Na<sub>2</sub>SO<sub>4</sub> and evaporated. The resulting crude product was purified by silica gel chromatography (EtOAc/*n*-Hex) to give **L5** (1.03 g) which was further purified by recrystallization from *n*-hexane/EtOAc.

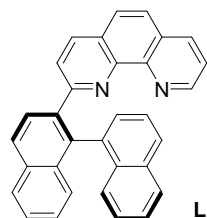

**L1** (86% yield): White solid, m.p. 195-200 °C; <sup>1</sup>H NMR (CD<sub>3</sub>OD) δ 9.06 (1H, d, *J* = 2.0 Hz), 8.39 (1H, dd, *J* = 8.1, 1.5 Hz), 8.27 (1H, d, *J* = 8.5 Hz), 8.06 (1H, d, *J* = 8.2 Hz), 7.91 (1H, s), 7.90 (1H, d, *J* = 5.8 Hz), 7.86 (1H, d, *J* = 8.0 Hz), 7.78 (1H, dt, *J* = 8.7, 1.6 Hz), 7.71-7.76 (2H, m), 7.70 (1H, dt, *J* = 8.4, 1.7 Hz), 7.65 (1H, dt, *J* = 8.8, 1.7 Hz), 7.54 (1H, t, *J* = 7.4 Hz), 7.46 (1H, d, *J* = 8.5 Hz), 7.41 (1H, dd, *J* = 8.1, 7.0 Hz), 7.24-7.39 (4H, m), 7.07-7.12 (1H, m); <sup>13</sup>C NMR (CD<sub>3</sub>OD) δ 161.3, 150.8, 146.8, 146.5, 140.0, 138.2, 137.93, 137.90, 136.3, 135.3, 135.1, 134.9, 134.5, 131.0, 130.6, 129.9, 129.7, 129.4, 128.4, 128.2, 127.8, 127.67, 127.65, 127.59, 127.55, 127.1, 126.6, 125.7, 124.6; IR (neat) 2361, 2337, 1653, 1559, 1540, 1506, 752 cm<sup>-1</sup>; MS (ESI<sup>+</sup>) *m/z* (%): 433 ([M+H]<sup>+</sup>, 100); [α]<sub>D</sub><sup>24</sup> +316 (MeOH, *c* 0.36)

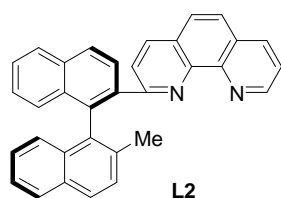

**L2** (53% yield): Pale brown solid, m.p. 124-127 °C (decomp.); <sup>1</sup>H NMR (CDCl<sub>3</sub>) δ 9.24 (1H, dd, *J* = 4.3, 1.6 Hz), 8.48 (1H, d, *J* = 8.6 Hz), 8.17 (1H, dd, *J* = 8.1, 1.5 Hz), 8.16 (1H, d, *J* = 8.9 Hz), 8.00 (1H, d, *J* = 8.2 Hz), 7.85 (1H, d, *J* = 7.8 Hz), 7.80 (1H, d, *J* = 8.4 Hz), 7.65 (1H, d, *J* = 8.7 Hz), 7.60 (1H, dd, *J* = 7.9, 4.6 Hz), 7.59 (1H, d, *J* = 8.4 Hz), 7.55 (1H, d, *J* = 8.7 Hz), 7.50 (1H, t, *J* = 7.4 Hz), 7.34-7.39 (2H, m), 7.28 (1H, d, *J* = 8.4 Hz), 7.21-7.27 (2H, m), 7.18 (1H, d, *J* = 8.5 Hz), 7.01 (1H, d, *J* = 8.4

Hz), 1.98 (3H, s);  $^{13}\text{C}$  NMR ( $\text{CDCl}_3$ )  $\delta$  159.1, 150.3, 146.5, 146.0, 138.4, 135.9, 135.7, 135.2, 134.8, 134.5, 134.0, 133.8, 132.6, 131.8, 129.1, 128.78, 128.75, 128.6, 128.1, 127.9, 127.8, 126.8, 126.7, 126.45, 126.40, 126.3, 126.1, 124.8, 123.4, 122.6, 20.9; IR (neat) 2361, 1588, 1507, 1487, 853, 814, 751  $\text{cm}^{-1}$ ; MS ( $\text{ESI}^+$ )  $m/z$  (%): 447 ( $[\text{M}+\text{H}]^+$ , 100);  $[\alpha]_{\text{D}}^{26} +299$  ( $\text{CHCl}_3$ ,  $c$  0.95)

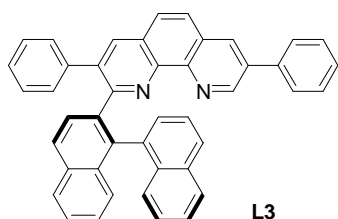

**L3** (78% yield): White semisolid;  $^1\text{H}$  NMR ( $\text{DMSO}-d_6$ , VT80)  $\delta$  9.39 (1H, d,  $J = 2.0$  Hz), 8.68 (1H, d,  $J = 2.0$  Hz), 8.17 (1H, d,  $J = 8.4$  Hz), 8.09 (1H, s), 8.08 (1H, d,  $J = 7.4$  Hz), 7.97 (1H, d,  $J = 8.8$  Hz), 7.92-7.97 (4H, m), 7.88 (1H, d,  $J = 8.8$  Hz), 7.72 (1H, br-d,  $J = 8.0$  Hz), 7.69 (1H, d,  $J = 8.5$  Hz), 7.61 (2H, t,  $J = 7.7$  Hz), 7.48-7.55 (2H, m), 7.27 (1H, ddd,  $J = 8.2, 7.1, 1.1$  Hz), 7.22 (1H, br-t,  $J = 7.2$  Hz), 7.15-7.20 (1H, m), 7.14 (1H, t,  $J = 7.6$  Hz), 7.04-7.12 (1H, m), 7.01 (1H, d,  $J = 8.5$  Hz), 6.74-6.98 (5H, m);  $^{13}\text{C}$  NMR ( $\text{DMSO}-d_6$ , VT80)  $\delta$  157.6, 148.0, 144.2, 143.0, 141.6, 138.5, 138.08, 138.05, 136.6, 136.1, 135.4, 135.2, 134.3, 134.1, 132.6, 132.3, 132.2, 132.0, 131.6, 128.8, 128.7, 128.1, 127.9, 127.6, 127.3, 127.1, 127.0, 126.8, 126.7, 126.6, 126.3, 125.9, 125.7, 125.6, 124.8, 124.5, 124.1; IR (neat) 2361, 1506, 1410, 803, 779, 751, 697  $\text{cm}^{-1}$ ; MS ( $\text{ESI}^+$ )  $m/z$  (%): 585 ( $[\text{M}+\text{H}]^+$ , 100);  $[\alpha]_{\text{D}}^{22} +248$  ( $\text{CHCl}_3$ ,  $c$  0.5)

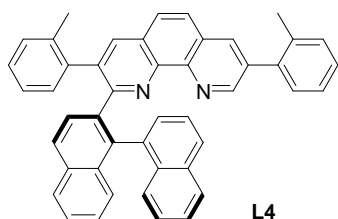

**L4** (58% yield): White solid, m.p. 250-252  $^{\circ}\text{C}$ ;  $^1\text{H}$  NMR ( $\text{DMSO}-d_6$ , VT80)  $\delta$  9.08 (1H, d,  $J = 1.6$  Hz), 8.42 (1H, d,  $J = 2.1$  Hz), 8.07-8.12 (2H, m), 8.03 (1H, d,  $J = 8.2$  Hz), 7.97 (1H, d,  $J = 8.8$  Hz), 7.90 (1H, d,  $J = 8.8$  Hz), 7.79-7.87 (1H, br-s), 7.80 (1H, d,  $J = 8.2$  Hz), 7.71-7.76 (1H, m), 7.48 (1H, t,  $J = 7.5$  Hz), 7.36-7.46 (4H, m), 7.34 (1H, t,  $J = 7.4$  Hz), 7.22 (3H, t,  $J = 7.2$  Hz), 7.04 (1H, br-t,  $J = 7.4$  Hz), 6.93 (1H, d,  $J = 8.4$  Hz), 6.75-7.10 (5H, m), 3.06 (3H, s), 2.38 (3H, s);  $^{13}\text{C}$  NMR ( $\text{DMSO}-d_6$ , VT80)  $\delta$  149.7, 143.9, 143.0, 138.4, 137.3, 137.1, 137.0, 135.6, 135.3, 135.0, 134.9, 134.5, 132.5, 132.1, 132.0, 131.9, 130.20, 130.15, 129.9, 129.6, 127.77, 127.74, 127.6, 127.14, 127.05, 126.8, 126.46, 126.43, 126.3, 126.1, 125.9, 125.8, 125.7, 125.5, 125.0, 124.7, 124.24, 124.18, 78.7, 19.6; IR (neat) 3055, 2957, 1494, 1455, 1430, 1408, 1216, 1074, 924, 803, 752  $\text{cm}^{-1}$ ; MS ( $\text{ESI}^+$ )  $m/z$  (%): 613 ( $[\text{M}+\text{H}]^+$ , 100);  $[\alpha]_{\text{D}}^{22} +507$  ( $\text{CHCl}_3$ ,  $c$  0.93)

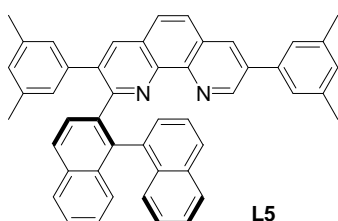

**L5** (62% yield): Yellow solid, m.p. 145-148  $^{\circ}\text{C}$  (decomp.);  $^1\text{H}$  NMR ( $\text{DMSO}-d_6$ , VT80)  $\delta$  9.37 (1H, d,  $J = 2.0$  Hz), 8.64 (1H, d,  $J = 1.9$  Hz), 8.18 (1H, d,  $J = 8.4$  Hz), 8.08 (1H, d,  $J = 8.2$  Hz), 8.03 (2H, s), 7.97 (1H, d,  $J = 8.4$  Hz), 7.95 (1H, d,  $J = 10.0$  Hz), 7.85 (1H, d,  $J = 8.8$  Hz), 7.72 (1H, br-d,  $J = 7.5$  Hz), 7.68 (1H, d,  $J = 8.7$  Hz), 7.53 (2H, s), 7.51 (1H, ddd,  $J = 8.1, 6.9, 1.2$  Hz), 7.25 (1H, ddd,  $J = 8.3, 7.0, 1.2$  Hz), 7.19-7.28 (1H, m), 7.13 (1H, br-s), 7.11

(1H, d,  $J = 7.8$  Hz), 6.99 (1H, d,  $J = 8.5$  Hz), 6.91 (1H, t,  $J = 7.2$  Hz), 6.74 (1H, br-s), 6.48 (2H, br-s), 2.43 (6H, s), 2.02 (6H, br-s);  $^{13}\text{C}$  NMR (DMSO- $d_6$ , VT80)  $\delta$  157.7, 148.0, 144.1, 142.9, 138.7, 138.0, 137.8, 136.5, 136.2, 135.8, 135.6, 135.0, 134.3, 134.2, 132.5, 132.2, 132.0, 131.6, 129.4, 128.8, 127.6, 127.0, 126.8, 126.72, 126.66, 126.5, 126.21, 125.81, 125.77, 125.5, 124.6, 124.5, 123.9, 20.5, 20.3; IR (neat) 1602, 1407, 1218, 849, 802, 747  $\text{cm}^{-1}$ ; MS (ESI $^+$ )  $m/z$  (%): 641 ([M+H] $^+$ , 100);  $[\alpha]_{\text{D}}^{23} +432$  ( $\text{CHCl}_3$ ,  $c$  1.00)

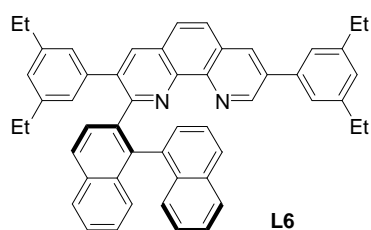

**L6** (24% yield): Yellow solid, m.p. 153-158 °C (decomp.);  $^1\text{H}$  NMR (DMSO- $d_6$ , VT80)  $\delta$  9.38 (1H, d,  $J = 2.0$  Hz), 8.65 (1H, br-s), 8.20 (1H, d,  $J = 8.4$  Hz), 8.05-8.13 (3H, m), 7.99 (1H, d,  $J = 8.4$  Hz), 7.96 (1H, d,  $J = 8.9$  Hz), 7.87 (1H, d,  $J = 8.7$  Hz), 7.65-7.73 (2H, m), 7.57 (2H, br-s), 7.51 (1H, ddd,  $J = 8.0, 7.1, 0.9$  Hz), 7.24 (1H, br-t,  $J = 7.2$  Hz), 7.19 (1H, br-s), 7.11 (1H, br-t,  $J = 7.6$  Hz), 6.98 (1H, d,  $J = 8.4$  Hz), 6.88 (1H, br-t,  $J = 7.3$  Hz), 6.82 (2H, br-s), 6.59 (2H, br-s), 2.76 (4H, q,  $J = 7.6$  Hz), 2.28-2.42 (4H, m), 1.31 (6H, t,  $J = 7.6$  Hz), 0.95 (6H, t,  $J = 7.6$  Hz); IR (neat) 1598, 1458, 1408, 1216, 869, 745, 709  $\text{cm}^{-1}$ ; MS (ESI $^+$ )  $m/z$  (%): 697 ([M+H] $^+$ , 100);  $[\alpha]_{\text{D}}^{24} +331$  ( $\text{CHCl}_3$ ,  $c$  0.57)

### 3. Experimental procedure for preparation of starting material 2a-d and characterization data.

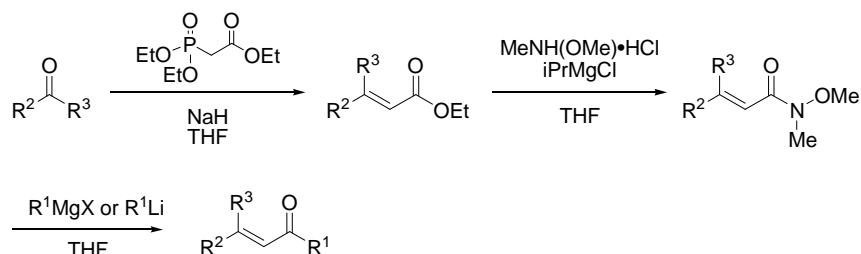

**General procedure<sup>5</sup>:** To a suspension of NaH (60 % dispersion in oil, 12.0 mmol) in THF (10 mL) was added a solution of triethyl phosphonoacetate (12.0 mmol) in THF (5 mL) under a nitrogen atmosphere at 0 °C. After being stirred at room temperature for 30 min, a solution of a corresponding ketone (10 mmol) in THF (5 mL) was added to the reaction mixture at 0 °C. After being further stirred at room temperature for 16 h, the reaction was quenched by adding sat. aq.  $\text{NaHCO}_3$  and diluted with EtOAc. The organic layer was separated and washed with brine, dried over  $\text{MgSO}_4$  and concentrated at reduced pressure. The residue was purified by silica gel column chromatography ( $\text{Et}_2\text{O}:\textit{n}$ -Hex=0:100 to 10:90) to afford the corresponding  $\alpha,\beta$ -unsaturated ester.

To a suspension of the  $\alpha,\beta$ -unsaturated ester (3.0 mmol) obtained above and *N,O*-dimethylhydroxylamine hydrochloride (6.0 mmol) in THF (6.0 mL) was added dropwise *iPrMgCl* (2.0 M solution in THF, 6.0 mmol) under nitrogen atmosphere at -5 to -10 °C. After being stirring at 0 °C for 30 min, the reaction was quenched by

adding sat. aq.  $\text{NH}_4\text{Cl}$  and diluted with EtOAc. The organic layer was separated and washed with brine, dried over  $\text{MgSO}_4$  and concentrated at reduced pressure. The residue was purified by silica gel column chromatography (EtOAc:*n*-Hex=10:90 to 40:60) to afford the corresponding Weinreb amide.

To a solution of the Weinreb amide (1.0 mmol) obtained above in THF (2.0 mL) was added dropwise a solution of the corresponding Grignard reagent or lithium reagent (1.5 mmol) under nitrogen atmosphere at  $-30\text{ }^\circ\text{C}$ . After being stirring at  $0\text{ }^\circ\text{C}$  for 30 min, the reaction was quenched by adding sat. aq.  $\text{NH}_4\text{Cl}$  and diluted with EtOAc. The organic layer was separated and washed with brine, dried over  $\text{MgSO}_4$  and concentrated at reduced pressure. The residue was purified by silica gel column chromatography (EtOAc:*n*-Hex=0:100 to 10:90) to afford the corresponding  $\beta,\beta$ -disubstituted enone.

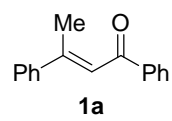
**1a** (43% yield)<sup>5</sup>: yellow oil;  $^1\text{H}$  NMR ( $\text{CDCl}_3$ )  $\delta$  7.98-8.02 (2H, m), 7.53-7.59 (3H, m), 7.45-7.50 (2H, m), 7.38-7.45 (3H, m), 7.17 (1H, d,  $J = 1.3$  Hz), 2.60 (3H, d,  $J = 1.3$  Hz);  $^{13}\text{C}$  NMR ( $\text{CDCl}_3$ )  $\delta$  191.8, 155.0, 142.7, 139.3, 132.5, 129.1, 128.6, 128.5, 128.2, 126.4, 122.1, 18.8; IR (neat) 3058, 1658, 1599, 1493, 1448, 1275, 1214, 1047, 1025, 951, 854, 753  $\text{cm}^{-1}$ ; MS (ESI<sup>+</sup>)  $m/z$  (%): 223 ([M+H]<sup>+</sup>, 100).

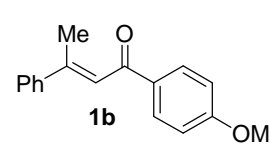
**1b** (26% yield): yellow oil;  $^1\text{H}$  NMR ( $\text{CDCl}_3$ )  $\delta$  8.00 (2H, d,  $J = 8.9$  Hz), 7.55-7.59 (2H, m), 7.37-7.45 (3H, m), 7.13 (1H, d,  $J = 1.2$  Hz), 6.96 (2H, d,  $J = 8.9$  Hz), 3.88 (3H, s), 2.57 (3H, d,  $J = 1.2$  Hz);  $^{13}\text{C}$  NMR ( $\text{CDCl}_3$ )  $\delta$  190.7, 163.2, 153.7, 142.9, 132.2, 130.6, 128.9, 128.6, 126.4, 122.3, 113.7, 55.5, 18.8; IR (neat) 3062, 3030, 2975, 2938, 2879, 1691, 1598, 1450, 1402, 1228, 1001, 946, 845, 751; MS (ESI<sup>+</sup>)  $m/z$  (%): 253 ([M+H]<sup>+</sup>, 100).

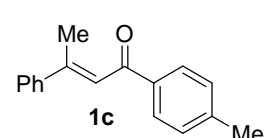
**1c** (45% yield): yellow oil;  $^1\text{H}$  NMR ( $\text{CDCl}_3$ )  $\delta$  7.91 (2H, d,  $J = 8.2$  Hz), 7.57 (1H, dd,  $J = 8.0, 1.5$  Hz), 7.37-7.45 (3H, m), 7.27 (2H, d,  $J = 8.0$  Hz), 7.15 (1H, d,  $J = 1.0$  Hz), 2.58 (3H, d,  $J = 1.1$  Hz), 2.42 (3H, s);  $^{13}\text{C}$  NMR ( $\text{CDCl}_3$ )  $\delta$  191.6, 154.4, 143.3, 142.9, 136.8, 129.2, 129.0, 128.6, 128.4, 126.5, 122.3, 21.6, 18.8; IR (neat) 3056, 3029, 2920, 1653, 1608, 1573, 1446, 1276, 1221, 1206, 1179, 1049, 945, 822  $\text{cm}^{-1}$ ; MS (ESI<sup>+</sup>)  $m/z$  (%): 237 ([M+H]<sup>+</sup>, 100).

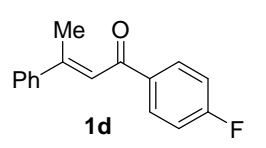
**1d** (46% yield): yellow oil;  $^1\text{H}$  NMR ( $\text{CDCl}_3$ )  $\delta$  8.02 (2H, m), 7.55-7.59 (2H, m), 7.38-7.45 (3H, m), 7.15 (2H, t,  $J = 8.6$  Hz), 7.12 (1H, s), 2.59 (3H, s);  $^{13}\text{C}$  NMR ( $\text{CDCl}_3$ )  $\delta$  190.3, 165.4 (d,  $J = 254$  Hz), 155.4, 142.6, 135.7 (d,  $J = 2.4$  Hz), 130.8 (d,  $J = 9.2$  Hz), 129.2, 128.6, 121.7, 115.6 (d,  $J = 21.8$  Hz), 18.9; IR (neat) 3061, 1656,

1599, 1504, 1446, 1276, 1213, 1155, 841, 766  $\text{cm}^{-1}$ ; MS (ESI<sup>+</sup>) m/z (%): 241 ([M+H]<sup>+</sup>, 100).

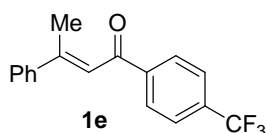

**1e** (39% yield): yellow solid; <sup>1</sup>H NMR (CDCl<sub>3</sub>)  $\delta$  8.08 (2H, d,  $J$  = 8.16 Hz), 7.74 (1H, d,  $J$  = 8.12 Hz), 7.55-7.62 (2H, m), 7.40-7.47 (3H, m), 7.15 (1H, s), 2.64 (3H, s); <sup>13</sup>C NMR (CDCl<sub>3</sub>)  $\delta$  190.4, 157.2, 142.5, 142.2, 133.8 (q,  $J$  = 32.6 Hz), 129.5, 128.7, 128.5, 126.5, 125.8 (q,  $J$  = 5.2 Hz), 123.7 (q,  $J$  = 272 Hz), 121.2, 19.1; IR (neat) 1661, 1596, 1575, 1447, 1410, 1325, 1276, 1213, 1129, 1112, 1067, 1015, 950, 844, 768, 746, 694  $\text{cm}^{-1}$ ; MS (ESI<sup>+</sup>) m/z (%): 291 ([M+H]<sup>+</sup>, 100).

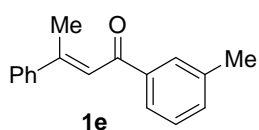

**1f** (29% yield): yellow oil; <sup>1</sup>H NMR (CDCl<sub>3</sub>)  $\delta$  7.77-7.81 (2H, m), 7.56-7.59 (2H, m), 7.39-7.45 (3H, m), 7.39-7.33 (2H, m), 7.14 (1H, d,  $J$  = 1.1 Hz), 2.59 (3H, d,  $J$  = 1.1 Hz), 2.42 (3H, s); <sup>13</sup>C NMR (CDCl<sub>3</sub>)  $\delta$  192.1, 154.7, 142.8, 139.4, 138.3, 133.3, 129.1, 128.8, 128.6, 128.4, 126.5, 125.5, 122.3, 21.4, 18.8; IR (neat) 3058, 2920, 1656, 1594, 1446, 1378, 1278, 1241, 1164, 761  $\text{cm}^{-1}$ ; MS (ESI<sup>+</sup>) m/z (%): 237 ([M+H]<sup>+</sup>, 100).

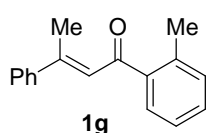

**1g** (28% yield): yellow oil; <sup>1</sup>H NMR (CDCl<sub>3</sub>)  $\delta$  7.58-7.61 (1H, m), 7.53-7.56 (2H, m), 7.35-7.42 (4H, m), 7.25-7.28 (2H, m), 6.89 (1H, d,  $J$  = 1.3 Hz), 2.58 (3H, d,  $J$  = 1.2 Hz), 2.53 (3H, s); <sup>13</sup>C NMR (CDCl<sub>3</sub>)  $\delta$  196.1, 154.4, 142.5, 140.6, 137.3, 131.5, 130.7, 129.2, 128.6, 128.4, 126.5, 125.6, 125.3, 20.6, 18.6; IR (neat) 1659, 1593, 1573, 1446, 1212, 1040, 942, 756, 695  $\text{cm}^{-1}$ ; MS (ESI<sup>+</sup>) m/z (%): 237 ([M+H]<sup>+</sup>, 100).

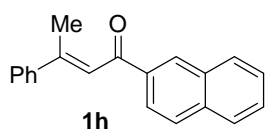

**1h** (43% yield)<sup>6</sup>; <sup>1</sup>H NMR (CDCl<sub>3</sub>)  $\delta$  8.50 (1H, br-s), 8.09 (1H, dd,  $J$  = 8.6, 1.7 Hz), 7.97 (1H, d,  $J$  = 8.1 Hz), 7.93 (1H, d,  $J$  = 8.6 Hz), 7.89 (1H, d,  $J$  = 7.9 Hz), 7.63 (2H, m), 7.60 (1H, ddd,  $J$  = 8.1, 6.8, 1.3 Hz), 7.55 (1H, ddd,  $J$  = 8.1, 6.8, 1.3 Hz), 7.40-7.49 (2H, m), 7.32 (1H, d,  $J$  = 1.3 Hz), 2.64 (3H, d,  $J$  = 1.3 Hz); <sup>13</sup>C NMR (CDCl<sub>3</sub>)  $\delta$  191.8, 155.0, 142.8, 136.6, 135.3, 132.6, 129.7, 129.5, 129.1, 128.6, 128.4, 128.2, 127.8, 126.7, 126.5, 124.3, 122.2, 18.9; IR (neat) 3056, 1650, 1626, 1595, 1572, 1446, 1380, 1281, 1183, 1124, 856, 821, 763  $\text{cm}^{-1}$ ; MS (ESI<sup>+</sup>) m/z (%): 273 ([M+H]<sup>+</sup>, 100).

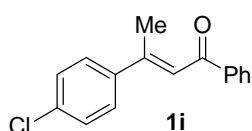

**1i** (31% yield): yellow oil; <sup>1</sup>H NMR (CDCl<sub>3</sub>)  $\delta$  7.96-8.00 (2H, m), 7.56 (1H, t,  $J$  = 7.4 Hz), 7.46-7.53 (4H, m), 7.39 (2H, d,  $J$  = 8.6 Hz), 7.14 (1H, d,  $J$  = 1.2 Hz), 2.56 (3H, d,  $J$  = 1.1 Hz); <sup>13</sup>C NMR (CDCl<sub>3</sub>)  $\delta$  191.7, 153.4, 141.0, 139.1, 135.1, 132.7, 128.8, 128.6, 128.2, 127.8, 122.4, 18.7; IR (neat) 1655, 1600, 1489, 1447, 1276, 1214, 1095, 1046, 1011, 825, 780, 691  $\text{cm}^{-1}$ ; MS (ESI<sup>+</sup>) m/z (%): 259 ([M+H+2]<sup>+</sup>, 30), 257 ([M+H]<sup>+</sup>, 100).



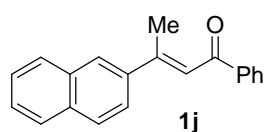

**1j** (54% yield): yellow oil;  $^1\text{H}$  NMR ( $\text{CDCl}_3$ )  $\delta$  8.00-8.05 (3H, m), 7.84-7.92 (3H, m), 7.70 (1H, dd,  $J = 8.6$  Hz), 7.57 (1H, tt,  $J = 7.4, 1.3$  Hz), 7.47-7.54 (4H, m), 7.32 (1H, d,  $J = 1.2$  Hz), 2.71 (3H, d,  $J = 1.2$  Hz);  $^{13}\text{C}$  NMR ( $\text{CDCl}_3$ )  $\delta$  191.9, 154.8, 139.9, 139.4, 133.5, 133.2, 132.5, 128.6, 128.5, 128.29, 128.25, 127.6, 126.8, 126.6, 126.2, 124.1, 122.5, 18.9; IR (neat) 3057, 1655, 1600, 1447, 1281, 1268, 1237, 1211, 855, 818, 737, 698  $\text{cm}^{-1}$ ; MS ( $\text{ESI}^+$ )  $m/z$  (%): 273 ( $[\text{M}+\text{H}]^+$ , 100).

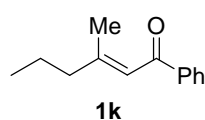

**1k** (45% yield): colorless oil;  $^1\text{H}$  NMR ( $\text{CDCl}_3$ )  $\delta$  7.92 (2H, d,  $J = 7.3$  Hz), 7.52 (1H, t,  $J = 7.3$  Hz), 7.45 (2H, t,  $J = 7.5$  Hz), 6.73 (1H, s), 2.24 (2H, t,  $J = 7.6$  Hz), 2.19 (3H, s), 1.61 (2H, sext,  $J = 7.5$  Hz), 0.97 (3H, t,  $J = 7.4$  Hz);  $^{13}\text{C}$  NMR ( $\text{CDCl}_3$ )  $\delta$  191.7, 160.2, 139.4, 132.2, 128.4, 128.1, 120.6, 43.5, 20.8, 19.7, 13.7; IR (neat) 1660, 1611, 1448, 1239, 1179, 1037, 1022, 775, 700, 667  $\text{cm}^{-1}$ ; MS ( $\text{ESI}^+$ )  $m/z$  (%): 189 ( $[\text{M}+\text{H}]^+$ , 100).

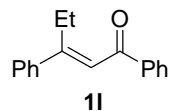

**1l** (21% yield)<sup>5</sup>: yellow oil;  $^1\text{H}$  NMR ( $\text{CDCl}_3$ )  $\delta$  7.99 (2H, d,  $J = 7.8$  Hz), 7.52-7.57 (3H, m), 7.47 (2H, t,  $J = 7.6$  Hz), 7.37-7.45 (3H, m), 7.04 (1H, s), 3.08 (2H, q,  $J = 7.5$  Hz), 1.13 (3H, t,  $J = 7.5$  Hz);  $^{13}\text{C}$  NMR ( $\text{CDCl}_3$ )  $\delta$  191.5, 161.4, 141.6, 139.3, 132.5, 129.0, 128.6, 128.5, 128.3, 126.8, 121.9, 25.1, 13.6; IR (neat) 3058, 2970, 2933, 2873, 1657, 1599, 1493, 1448, 1377, 1290, 1240, 1213, 1178, 1046, 1002, 993, 761, 696  $\text{cm}^{-1}$ ; MS ( $\text{ESI}^+$ )  $m/z$  (%): 237 ( $[\text{M}+\text{H}]^+$ , 100).

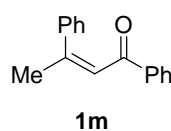

**1m** (18% yield): yellow oil;  $^1\text{H}$  NMR ( $\text{CDCl}_3$ )  $\delta$  7.83 (2H, d,  $J = 8.4$  Hz), 7.44 (1H, t,  $J = 7.4$  Hz), 7.34 (2H, t,  $J = 7.7$  Hz), 7.16-7.26 (5H, m), 6.69 (1H, s), 2.31 (3H, s);  $^{13}\text{C}$  NMR ( $\text{CDCl}_3$ )  $\delta$  193.1, 152.4, 140.6, 138.0, 132.5, 128.7, 128.2, 128.04, 127.95, 127.4, 124.2, 26.5; IR (neat) 1663, 1653, 1636, 1616, 1597, 1577, 1492, 1448, 1240, 1201, 1176, 1025, 977, 848, 778, 761, 736, 696, 668  $\text{cm}^{-1}$ ; MS ( $\text{ESI}^+$ )  $m/z$  (%): 223 ( $[\text{M}+\text{H}]^+$ , 100).

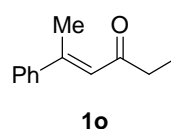

**1o** (43% yield)<sup>7</sup>: colorless oil;  $^1\text{H}$  NMR ( $\text{CDCl}_3$ )  $\delta$  7.47-7.51 (2H, m), 7.35-7.41 (3H, m), 6.50 (1H, d,  $J = 1.2$  Hz), 2.57 (2H, q,  $J = 7.3$ ), 2.55 (3H, d,  $J = 1.1$  Hz), 1.13 (3H, t,  $J = 7.3$ );  $^{13}\text{C}$  NMR ( $\text{CDCl}_3$ )  $\delta$  201.9, 153.5, 142.7, 129.0, 128.5, 126.4, 124.0, 38.0, 18.4, 8.2; IR (neat) 1684, 1604, 1447, 1377, 1124, 1045, 951, 756, 695  $\text{cm}^{-1}$ .

#### 4. Experimental procedure for Iron-catalyzed asymmetric epoxidations and characterization data.

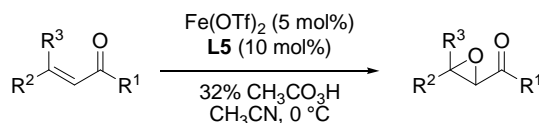

**General procedure:** A solution of Fe(OTf)<sub>2</sub> (0.025 M solution in CH<sub>3</sub>CN, 0.31 mL, 7.8 μmol) was added to **L5** (10 mg, 15.6 μmol) under nitrogen atmosphere at room temperature. After rinsed with additional CH<sub>3</sub>CN (0.31 mL), the reaction mixture was stirred at room temperature for 3 h. To the solution of iron complex was added a solution of a corresponding enone (0.156 mmol) in CH<sub>3</sub>CN (0.1 mL) and the mixture was cooled in ice bath. To the reaction was rapidly added CH<sub>3</sub>CO<sub>3</sub>H (32 wt% solution in CH<sub>3</sub>CO<sub>2</sub>H, 50 μL, 0.234 mmol). After being stirred in ice bath for 30 min, the reaction was quenched by adding a mixture of 10 % aq. Na<sub>2</sub>S<sub>2</sub>O<sub>3</sub> and sat. aq. NaHCO<sub>3</sub>, and diluted with EtOAc. The organic layer was separated and washed with brine, dried over MgSO<sub>4</sub> and concentrated at reduced pressure. The residue was purified by silica gel column chromatography and NH-silica gel column chromatography (EtOAc:*n*-Hex=0:100 to 15:85) to afford the corresponding α,β-epoxyketone.

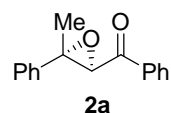 **2a** (80 % yield, 91 % ee)<sup>8</sup>: white solid; <sup>1</sup>H NMR (CDCl<sub>3</sub>) δ 7.96 (2H, d, *J* = 7.8 Hz), 7.62 (1H, t, *J* = 7.4 Hz), 7.46-7.52 (4H, m), 7.43 (2H, t, *J* = 7.5 Hz), 7.37 (1H, t, *J* = 7.2 Hz), 4.16 (1H, s), 1.64 (3H, s); <sup>13</sup>C NMR (CDCl<sub>3</sub>) δ 193.0, 140.4, 135.6, 134.0, 128.9, 128.8, 128.2, 125.1, 66.9, 62.8, 16.9; IR (neat) 1691, 1598, 1449, 1383, 1229, 957, 848, 751 cm<sup>-1</sup>; MS (ESI<sup>+</sup>) *m/z* (%): 499 ([2M+Na]<sup>+</sup>, 30), 239 ([M+H]<sup>+</sup>, 100); [α]<sub>D</sub><sup>23</sup> -137 (CHCl<sub>3</sub>, *c* 0.66); lit.<sup>7b</sup> for (2*S*, 3*R*)-isomer: [α]<sub>D</sub><sup>25</sup> +147 (CHCl<sub>3</sub>, *c* 1.3); chiral HPLC analysis (Chiralcel AS-H, *i*PrOH:*n*-Hex=5/95, flow rate = 1.0 mL/min, λ = 254 nm), *t*<sub>r</sub> (minor) = 12.4 min, *t*<sub>r</sub> (major) = 29.3 min.

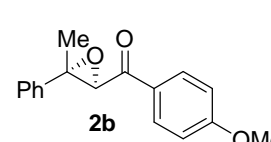 **2b** (78% yield, 90 % ee): yellowish oil; <sup>1</sup>H NMR (CDCl<sub>3</sub>) δ 7.96 (2H, d, *J* = 8.9 Hz), 7.46-7.50 (2H, m), 7.43 (2H, t, *J* = 7.6 Hz), 7.34-7.39 (1H, m), 6.96 (2H, d, *J* = 8.9 Hz), 4.11 (1H, s), 3.88 (3H, s), 1.62 (3H, s); <sup>13</sup>C NMR (CDCl<sub>3</sub>) δ 191.3, 164.1, 140.6, 130.6, 128.7, 128.1, 125.1, 114.1, 66.8, 62.5, 55.5, 17.0; IR (neat) 1682, 1600, 1261, 1239, 1171, 1025, 956, 857, 765, 699; MS (ESI<sup>+</sup>) *m/z* (%): 559 ([2M+Na]<sup>+</sup>, 30), 269 ([M+H]<sup>+</sup>, 50), 135 (100); [α]<sub>D</sub><sup>23</sup> -115 (CHCl<sub>3</sub>, *c* 0.90); chiral HPLC analysis (Chiralcel AS-H, *i*PrOH:*n*-Hex=10/90, flow rate = 1.0 mL/min, λ = 254 nm), *t*<sub>r</sub> (minor) = 18.7 min, *t*<sub>r</sub> (major) = 46.1 min.

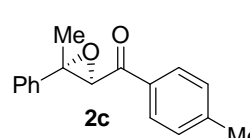 **2c** (77 % yield, 92 % ee): white solid; <sup>1</sup>H NMR (CDCl<sub>3</sub>) δ 7.82 (2H, d, *J* = 8.2 Hz), 7.49 (2H, d, *J* = 7.2 Hz), 7.43 (2H, t, *J* = 7.4 Hz), 7.37 (1H, t, *J* = 7.2 Hz), 7.29 (2H, d, *J* = 8.1 Hz), 4.14 (1H, s), 2.43 (3H, s), 1.62 (3H, s); <sup>13</sup>C NMR (CDCl<sub>3</sub>) δ 192.5, 145.0, 140.5, 133.1, 129.6, 128.7, 128.3, 128.2, 125.1, 66.8, 62.7, 21.8, 17.0; IR (neat) 1688,

1606, 1382, 1232, 1181, 955, 761, 699  $\text{cm}^{-1}$ ; MS (ESI<sup>+</sup>)  $m/z$  (%): 527 ([2M+Na]<sup>+</sup>, 30), 253 ([M+H]<sup>+</sup>, 70), 119 (100);  $[\alpha]_{\text{D}}^{24}$  -128 (CHCl<sub>3</sub>,  $c$  0.72); chiral HPLC analysis (Chiralcel AS-H, *i*PrOH:*n*-Hex=10/90, flow rate = 1.0 mL/min,  $\lambda$  = 254 nm),  $t_{\text{r}}$  (minor) = 12.7 min,  $t_{\text{r}}$  (major) = 34.6 min.

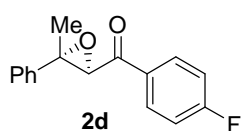

**2d** (78 % yield, 92 % ee): white solid; <sup>1</sup>H NMR (CDCl<sub>3</sub>)  $\delta$  8.02 (2H, m), 7.46-7.51 (2H, m), 7.43 (2H, t,  $J$  = 7.4 Hz), 7.35-7.40 (1H, m), 7.17 (2H, t,  $J$  = 8.6 Hz), 4.11 (1H, s), 1.63 (3H, s); <sup>13</sup>C NMR (CDCl<sub>3</sub>)  $\delta$  191.5, 166.2 (d,  $J$  = 257 Hz), 140.2, 132.1, 131.0 (d,  $J$  = 9.6 Hz), 128.8, 128.3, 125.1, 116.2 (d,  $J$  = 22.1 Hz), 66.7, 62.3, 17.0; IR (neat) 1691, 1598, 1506, 1231, 1156, 958, 860, 763, 699  $\text{cm}^{-1}$ ; MS (ESI<sup>+</sup>)  $m/z$  (%): 535 ([2M+Na]<sup>+</sup>, 30), 257 ([M+H]<sup>+</sup>, 70), 123 (100);  $[\alpha]_{\text{D}}^{22}$  -129 (CHCl<sub>3</sub>,  $c$  0.58); chiral HPLC analysis (Chiralcel AS-H, *i*PrOH:*n*-Hex=10/90, flow rate = 1.0 mL/min,  $\lambda$  = 254 nm),  $t_{\text{r}}$  (minor) = 13.5 min,  $t_{\text{r}}$  (major) = 34.0 min.

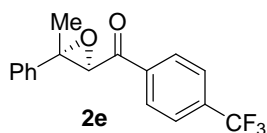

**2e** (70 % yield, 89 % ee): white solid; <sup>1</sup>H NMR (CDCl<sub>3</sub>)  $\delta$  8.09 (2H, d,  $J$  = 8.1 Hz), 7.77 (2H, d,  $J$  = 8.2 Hz), 7.46-7.50 (2H, m), 7.44 (2H, t,  $J$  = 7.5 Hz), 7.37-7.41 (1H, m), 4.15 (1H, s), 1.64 (3H, s); <sup>13</sup>C NMR (CDCl<sub>3</sub>)  $\delta$  192.3, 140.0, 138.1, 135.1 (q,  $J$  = 32.9 Hz), 128.8, 128.7, 128.4, 126.0 (q,  $J$  = 3.7 Hz), 125.1, 123.4 (q,  $J$  = 273 Hz), 66.8, 63.1, 17.0; IR (neat) 1699, 1414, 1326, 1227, 1171, 1131, 1107, 1067, 1015, 958, 863, 766, 698  $\text{cm}^{-1}$ ; MS (ESI<sup>+</sup>)  $m/z$  (%): 307 ([M+H]<sup>+</sup>, 20), 173 (100);  $[\alpha]_{\text{D}}^{23}$  -115 (CHCl<sub>3</sub>,  $c$  0.78); chiral HPLC analysis (Chiralcel AS-H, *i*PrOH:*n*-Hex=10/90, flow rate = 1.0 mL/min,  $\lambda$  = 254 nm),  $t_{\text{r}}$  (minor) = 7.2 min,  $t_{\text{r}}$  (major) = 10.9 min.

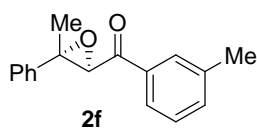

**2f** (67 % yield, 90 % ee): white solid; <sup>1</sup>H NMR (CDCl<sub>3</sub>)  $\delta$  7.80 (1H, s), 7.74 (1H, d,  $J$  = 7.6 Hz), 7.47-7.53 (2H, m), 7.41-7.47 (3H, m), 7.37 (2H, t,  $J$  = 7.7 Hz), 2.42 (3H, s), 1.63 (3H, s); <sup>13</sup>C NMR (CDCl<sub>3</sub>)  $\delta$  193.2, 140.5, 138.9, 135.6, 134.8, 128.74, 128.73, 128.6, 128.2, 125.5, 125.1, 66.9, 62.8, 21.3, 17.0; IR (neat) 1691, 1382, 1254, 1169, 934, 759, 699  $\text{cm}^{-1}$ ; MS (ESI<sup>+</sup>)  $m/z$  (%): 253 ([M+H]<sup>+</sup>, 60), 119 (100);  $[\alpha]_{\text{D}}^{23}$  -139 (CHCl<sub>3</sub>,  $c$  0.93); chiral HPLC analysis (Chiralcel AS-H, *i*PrOH:*n*-Hex=10/90, flow rate = 1.0 mL/min,  $\lambda$  = 254 nm),  $t_{\text{r}}$  (minor) = 8.5 min,  $t_{\text{r}}$  (major) = 19.6 min.

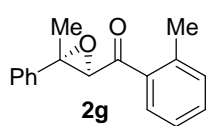

**2g** (61 % yield, 92 % ee): white solid; <sup>1</sup>H NMR (CDCl<sub>3</sub>)  $\delta$  7.65 (1H, d,  $J$  = 7.8 Hz), 7.46-7.50 (2H, m), 7.39-7.46 (3H, m), 7.34-7.38 (1H, m), 7.29 (2H, t,  $J$  = 8.2 Hz), 3.99 (1H, s), 2.59 (3H, s), 1.69 (3H, s); <sup>13</sup>C NMR (CDCl<sub>3</sub>)  $\delta$  195.8, 140.5, 139.4, 135.2, 132.4, 132.3, 129.3, 128.7, 128.2, 125.9, 125.1, 67.9, 63.2, 21.2, 16.7; IR (neat) 1691, 1455, 1381, 1221, 956, 752, 731, 698, 656  $\text{cm}^{-1}$ ; MS (ESI<sup>+</sup>)  $m/z$  (%): 527 ([2M+Na]<sup>+</sup>, 10), 253 ([M+H]<sup>+</sup>, 50), 119 (100);  $[\alpha]_{\text{D}}^{23}$  -154 (CHCl<sub>3</sub>,  $c$  0.80); chiral HPLC analysis (Chiralcel AS-H, *i*PrOH:*n*-Hex=10/90, flow rate = 1.0 mL/min,  $\lambda$  = 254 nm),  $t_{\text{r}}$  (minor) = 8.1 min,  $t_{\text{r}}$  (major) = 13.3 min.

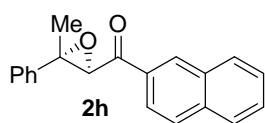

**2h** (88 % yield, 92 % ee): yellow oil;  $^1\text{H NMR}$  ( $\text{CDCl}_3$ )  $\delta$  8.49 (1H, s), 8.03 (1H, dd,  $J = 8.6$  Hz), 7.94 (2H, t,  $J = 7.4$  Hz), 7.89 (1H, d,  $J = 8.2$  Hz), 7.63 (1H, t,  $J = 7.5$  Hz), 7.52-7.59 (3H, m), 7.47 (2H, t,  $J = 7.5$  Hz), 7.40 (1H, br-t,  $J = 7.3$  Hz), 4.29 (1H, s), 1.67 (3H, s);  $^{13}\text{C NMR}$  ( $\text{CDCl}_3$ )  $\delta$  192.9, 140.5, 135.9, 132.9, 132.4, 130.4, 129.7, 129.0, 128.9, 128.8, 128.2, 127.9, 127.0, 125.1, 123.5, 66.9, 62.9, 17.1; IR (neat) 2361, 2337, 1685, 1394, 1276, 1181, 942, 762, 699  $\text{cm}^{-1}$ ; MS ( $\text{ESI}^+$ )  $m/z$  (%): 601 ( $[\text{2M}+\text{Na}]^+$ , 10), 289 ( $[\text{M}+\text{H}]^+$ , 70), 155 (100);  $[\alpha]_{\text{D}}^{25} -72.0$  ( $\text{CHCl}_3$ ,  $c$  1.70); chiral HPLC analysis (Chiralcel AS-H,  $i\text{PrOH}:n\text{-Hex}=10/90$ , flow rate = 1.0 mL/min,  $\lambda = 254$  nm),  $t_{\text{r}}$  (minor) = 12.4 min,  $t_{\text{r}}$  (major) = 29.3 min.

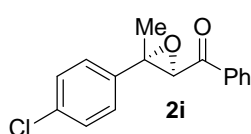

**2i** (88 % yield, 92 % ee): white solid;  $^1\text{H NMR}$  ( $\text{CDCl}_3$ )  $\delta$  7.95 (2H, d,  $J = 7.3$  Hz), 7.63 (1H, td,  $J = 7.5, 0.8$  Hz), 7.50 (2H, t,  $J = 7.7$  Hz), 7.38-7.45 (4H, m), 4.11 (1H, s), 1.62 (3H, s);  $^{13}\text{C NMR}$  ( $\text{CDCl}_3$ )  $\delta$  192.6, 139.0, 135.5, 134.2, 134.0, 129.0, 128.2, 126.6, 66.8, 62.3, 16.8; IR (neat) 1692, 1598, 1495, 1450, 1383, 1229, 1093, 1013, 957, 700, 667  $\text{cm}^{-1}$ ; MS ( $\text{ESI}^+$ )  $m/z$  (%): 567 ( $[\text{2M}+\text{Na}]^+$ , 40), 275 ( $[\text{M}+\text{H}+2]^+$ , 60), 273 ( $[\text{M}+\text{H}]^+$ , 95), 105 (100);  $[\alpha]_{\text{D}}^{23} -184$  ( $\text{CHCl}_3$ ,  $c$  0.82); chiral HPLC analysis (Chiralcel AS-H,  $i\text{PrOH}:n\text{-Hex}=10/90$ , flow rate = 1.0 mL/min,  $\lambda = 254$  nm),  $t_{\text{r}}$  (minor) = 10.1 min,  $t_{\text{r}}$  (major) = 30.8 min.

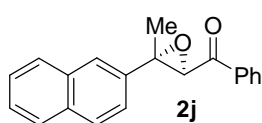

**2j** (45 % yield, 92 % ee): yellow oil;  $^1\text{H NMR}$  ( $\text{CDCl}_3$ )  $\delta$  7.96-7.99 (3H, m), 7.91 (1H, d,  $J = 8.7$  Hz), 7.86-7.90 (2H, m), 7.62 (1H, tt,  $J = 7.4, 1.2$  Hz), 7.56 (1H, dd,  $J = 8.6, 1.9$  Hz), 7.51-7.55 (2H, m), 7.49 (2H, t,  $J = 7.8$  Hz), 4.25 (1H, s), 1.75 (3H, s);  $^{13}\text{C NMR}$  ( $\text{CDCl}_3$ )  $\delta$  192.9, 137.8, 135.6, 134.0, 133.1, 133.0, 128.9, 128.7, 128.2, 128.1, 127.7, 126.6, 126.5, 124.6, 122.5, 67.0, 62.9, 16.9; IR (neat) 2361, 2337, 1685, 1449, 1386, 1228, 1181, 962, 820, 707, 669  $\text{cm}^{-1}$ ; MS ( $\text{ESI}^+$ )  $m/z$  (%): 289 ( $[\text{M}+\text{H}]^+$ , 100), 105 (60);  $[\alpha]_{\text{D}}^{24} -185$  ( $\text{CHCl}_3$ ,  $c$  1.47); chiral HPLC analysis (Chiralcel AS-H,  $i\text{PrOH}:n\text{-Hex}=10/90$ , flow rate = 1.0 mL/min,  $\lambda = 254$  nm),  $t_{\text{r}}$  (minor) = 12.6 min,  $t_{\text{r}}$  (major) = 26.8 min.

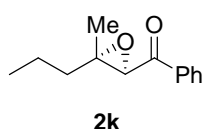

**2k** (20 % yield, 51 % ee): colorless oil;  $^1\text{H NMR}$  ( $\text{CDCl}_3$ )  $\delta$  7.99 (2H, dd,  $J = 7.4, 1.0$  Hz), 7.62 (1H, td,  $J = 7.4, 1.1$  Hz), 7.51 (2H, t,  $J = 7.7$  Hz), 4.06 (1H, s), 1.79 (2H, m), 1.57 (2H, sext,  $J = 7.6$  Hz), 1.23 (3H, s), 1.02 (3H, t,  $J = 7.3$  Hz);  $^{13}\text{C NMR}$  ( $\text{CDCl}_3$ )  $\delta$  194.4, 135.8, 133.7, 128.8, 128.2, 63.9, 63.5, 40.1, 18.4, 16.3, 14.1; IR (neat) 1691, 1598, 1450, 1401, 1385, 1229, 928, 693  $\text{cm}^{-1}$ ; MS ( $\text{ESI}^+$ )  $m/z$  (%): 187 ( $[\text{M}+\text{H}]^+$ , 20), 105 (100);  $[\alpha]_{\text{D}}^{23} -7.7$  ( $\text{CHCl}_3$ ,  $c$  0.19); chiral HPLC analysis (Chiralcel AS-H,  $i\text{PrOH}:n\text{-Hex}=10/90$ , flow rate = 1.0 mL/min,  $\lambda = 254$  nm),  $t_{\text{r}}$  (minor) = 7.1 min,  $t_{\text{r}}$  (major) = 38.0 min.

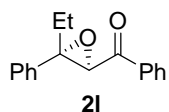

**2l** (72 % yield, 92 % ee)<sup>9</sup>: white solid, m.p. 49-51  $^{\circ}\text{C}$ ;  $^1\text{H NMR}$  ( $\text{CDCl}_3$ )  $\delta$  7.99-8.05 (2H, m), 7.63 (1H, tt,  $J = 7.4, 1.3$  Hz), 7.48-7.54 (4H, m), 7.44 (2H, t,  $J = 7.5$  Hz), 7.37 (1H, tt,  $J = 7.6,$

1.3 Hz), 4.15 (1H, s), 2.13 (1H, sext,  $J = 7.4$  Hz), 1.62 (1H, sext,  $J = 7.3$  Hz), 0.91 (3H, t,  $J = 7.4$  Hz);  $^{13}\text{C}$  NMR ( $\text{CDCl}_3$ )  $\delta$  193.1, 138.7, 135.6, 133.9, 128.9, 128.7, 128.2, 128.0, 125.8, 67.4, 67.1, 23.7, 9.4; IR (neat) 3062, 2975, 2938, 2879, 1691, 1598, 1450, 1228, 946, 845, 751  $\text{cm}^{-1}$ ; MS ( $\text{ESI}^+$ )  $m/z$  (%): 253 ( $[\text{M}+\text{H}]^+$ , 100), 105 (80);  $[\alpha]_{\text{D}}^{23}$  -82 ( $\text{CHCl}_3$ ,  $c$  1.3); chiral HPLC analysis (Chiralcel AS-H,  $i\text{PrOH}:n\text{-Hex}=10/90$ , flow rate = 1.0 mL/min,  $\lambda = 254$  nm),  $t_{\text{r}}$  (minor) = 8.8 min,  $t_{\text{r}}$  (major) = 16.9 min.

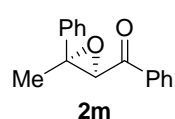

**2m** (33 % yield, 6 % ee): yellow solid;  $^1\text{H}$  NMR ( $\text{CDCl}_3$ )  $\delta$  7.82 (2H, d,  $J = 8.4$  Hz), 7.54 (1H, t,  $J = 7.4$  Hz), 7.41 (2H, t,  $J = 7.8$  Hz), 7.31 (2H, d,  $J = 8.2$  Hz), 7.13-7.21 (3H, m), 4.34 (1H, s), 1.93 (3H, s);  $^{13}\text{C}$  NMR ( $\text{CDCl}_3$ )  $\delta$  192.5, 136.6, 135.5, 133.5, 128.6, 128.0, 127.9, 127.8, 126.2, 66.1, 64.5, 24.4; IR (neat) 1684, 1228, 9757, 763, 700, 689  $\text{cm}^{-1}$ ; MS ( $\text{ESI}^+$ )  $m/z$  (%): 239 ( $[\text{M}+\text{H}]^+$ , 100), 261 ( $[\text{M}+\text{Na}]^+$ , 50); chiral HPLC analysis (Chiralcel AS-H,  $i\text{PrOH}:n\text{-Hex}=10/90$ , flow rate = 1.0 mL/min,  $\lambda = 254$  nm),  $t_{\text{r}}$  (minor) = 7.9 min,  $t_{\text{r}}$  (major) = 33.0 min.

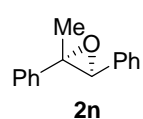

**2n** (50 % yield, 87 % ee)<sup>10</sup>: colorless oil;  $^1\text{H}$  NMR ( $\text{CDCl}_3$ )  $\delta$  7.44-7.48 (2H, m), 7.35-7.41 (6H, m), 7.30-7.34 (2H, m), 3.98 (1H, s), 1.47 (3H, s);  $^{13}\text{C}$  NMR ( $\text{CDCl}_3$ )  $\delta$  142.3, 135.9, 128.4, 128.2, 127.7, 127.5, 126.5, 125.1, 67.1, 63.1, 16.7; IR (neat) 1496, 1449, 1381, 1279, 1065, 1027, 763, 741, 698, 605  $\text{cm}^{-1}$ ; MS ( $\text{ESI}^+$ )  $m/z$  (%): 211 ( $[\text{M}+\text{H}]^+$ , 100);  $[\alpha]_{\text{D}}^{24}$  -107 (EtOH,  $c$  0.50); lit.<sup>10b</sup> for (*R,R*)-isomer (95.5% ee):  $[\alpha]_{\text{D}}^{25}$  +113.9 (EtOH,  $c$  0.9); chiral HPLC analysis (Chiralcel OD-H,  $i\text{PrOH}:n\text{-Hex}=3/97$ , flow rate = 1.0 mL/min,  $\lambda = 225$  nm),  $t_{\text{r}}$  (minor) = 14.1 min,  $t_{\text{r}}$  (major) = 5.5 min.

#### 4.1. Another example of the iron-catalyzed asymmetric epoxidation.

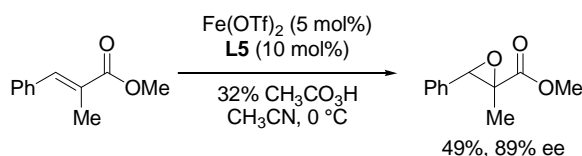

Some of  $\alpha,\beta$ -unsaturated esters can be epoxidized. For example,  $\alpha$ -methyl *trans*-cinnamic acid methyl ester was converted to the corresponding epoxide in 49% and 89% ee.

## 5. Representative procedure for Lewis acid mediated rearrangement and characterization data.

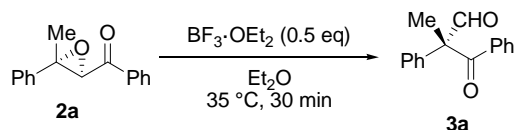

To a solution of **2a** (16 mg, 0.067 mmol, 91% ee) in Et<sub>2</sub>O (0.7 mL) was added BF<sub>3</sub>·OEt<sub>2</sub> (4 μL, 0.033 mmol). After being stirred at 35 °C for 30 min, the reaction was quenched by adding sat. aq. NaHCO<sub>3</sub> and diluted with EtOAc. The organic layer was separated and washed with brine, dried over MgSO<sub>4</sub> and concentrated at reduced pressure. The residue was purified by silica gel column chromatography (EtOAc:*n*-Hex=0:100 to 15:85) to afford **3a** (15.3 mg).

**3a** (95 % yield, 90 % ee)<sup>8b</sup>: colorless oil; <sup>1</sup>H NMR (CDCl<sub>3</sub>) δ 9.93 (1H, s), 7.62 (2H, d, *J* = 8.1 Hz), 7.41-7.48 (3H, m), 7.32-7.40 (3H, m), 7.29 (2H, t, *J* = 7.8 Hz), 1.87 (3H, s); <sup>13</sup>C NMR (CDCl<sub>3</sub>) δ 200.6, 196.6, 136.0, 134.4, 133.1, 129.9, 129.6, 128.4, 128.3, 127.0, 65.5, 17.5; IR (neat) 1729, 1684, 1666, 1597, 1578, 1494, 1447, 1260, 972, 760, 700 cm<sup>-1</sup>; MS (ESI<sup>+</sup>) *m/z* (%): 260 ([M+Na]<sup>+</sup>, 20), 239 ([M+H]<sup>+</sup>, 10), 225 (90), 163 (100); [α]<sub>D</sub><sup>24</sup> +425 (CHCl<sub>3</sub>, *c* 1.06); lit.<sup>7b</sup> for (*S*)-isomer: [α]<sub>D</sub><sup>25</sup> -411 (CHCl<sub>3</sub>, *c* 1.1); chiral HPLC analysis (Chiralcel AS-H, *i*PrOH:*n*-Hex=5/95, flow rate = 1.0 mL/min, λ = 254 nm), *t*<sub>r</sub> (major) = 10.4 min, *t*<sub>r</sub> (minor) = 12.1 min.

**3l** (58 % yield, 90 % ee): colorless oil ; <sup>1</sup>H NMR (CDCl<sub>3</sub>) δ 9.97 (1H, d, *J* = 1.6 Hz), 7.62-7.66 (2H, m), 7.446 (1H, tt, *J* = 7.4, 1.2 Hz), 7.38-7.43 (2H, m), 7.27-7.37 (5H, m), 2.82 (1H, sext, *J* = 7.2 Hz), 2.31 (1H, sextd, *J* = 7.1, 1.6 Hz), 0.84 (3H, t, *J* = 7.4 Hz); <sup>13</sup>C NMR (CDCl<sub>3</sub>) δ 199.8, 196.3, 135.8, 135.1, 133.1, 129.6, 128.4, 128.2, 127.3, 69.5, 24.6, 9.5; IR (neat) 1727, 1663, 1596, 1578, 1447, 1236, 758, 715, 700 cm<sup>-1</sup>; MS (ESI<sup>+</sup>) *m/z* (%): 275 ([M+Na]<sup>+</sup>, 10), 253 ([M+H]<sup>+</sup>, 20); [α]<sub>D</sub><sup>23</sup> +411 (CHCl<sub>3</sub>, *c* 0.63); chiral HPLC analysis (Chiralcel AS-H, *i*PrOH:*n*-Hex=5/95, flow rate = 1.0 mL/min, λ = 254 nm), *t*<sub>r</sub> (minor) = 7.2 min, *t*<sub>r</sub> (major) = 8.6 min.

**3o** (35 % yield, 77 % ee): colorless oil ; <sup>1</sup>H NMR (CDCl<sub>3</sub>) δ 9.92 (1H, s), 7.44 (2H, t, *J* = 7.6 Hz), 7.37 (1H, t, *J* = 7.3 Hz), 7.24-7.28 (2H, m), 2.36 (2H, q, *J* = 7.2 Hz), 1.70 (3H, s), 1.01 (3H, t, *J* = 7.2 Hz); <sup>13</sup>C NMR (CDCl<sub>3</sub>) δ 210.5, 198.9, 135.7, 129.4, 128.3, 127.0, 66.9, 32.2, 16.0, 7.9; IR (neat) 1729, 1702, 1494, 1459, 1446, 1377, 1344, 1187, 1091, 1026, 971, 759, 701 cm<sup>-1</sup>; MS (ESI<sup>+</sup>) *m/z* (%): 191 ([M+H]<sup>+</sup>, 100); [α]<sub>D</sub><sup>23</sup> +156 (CHCl<sub>3</sub>, *c* 0.34); chiral HPLC analysis (Chiralcel AS-H, *i*PrOH:*n*-Hex=5/95, flow rate = 1.0 mL/min, λ = 210 nm), *t*<sub>r</sub> (minor) = 22.9 min, *t*<sub>r</sub> (major) = 9.3 min.

## 6. Experimental procedure for the synthesis of isoxazoline 4a and characterization data.

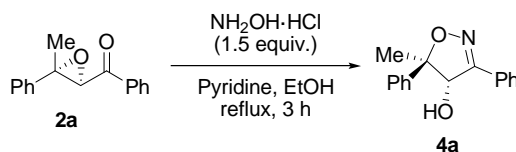

To a solution of **2a** (25 mg, 0.10 mmol, 91% ee) in EtOH (0.66 mL) was added  $\text{NH}_2\text{OH}\cdot\text{HCl}$  (11 mg, 0.16 mmol) and pyridine (73 mL, 0.90 mmol). After refluxing for 3 h, the reaction was quenched by adding 0.5 M aq. HCl and diluted with  $\text{Et}_2\text{O}$ . The organic layer was separated and dried over  $\text{MgSO}_4$  and concentrated at reduced pressure. The obtained residue was dissolved in  $\text{CHCl}_3$ , and the solution was filtered through short pad of silica gel. The filtrate was concentrated until white solid was precipitated which was collected to afford the oxime **4a** (17 mg, 99% ee).

**4a** (65 % yield, 99 % ee): white crystal ;  $^1\text{H}$  NMR ( $\text{DMSO}-d_6$ )  $\delta$  7.71-7.76 (2H, m), 7.39-7.43 (5H, m), 7.36 (2H, t,  $J = 7.6$  Hz), 7.26 (1H, t,  $J = 7.2$  Hz), 6.34 (1H, d,  $J = 8.1$  Hz), 5.18 (1H, d,  $J = 8.1$ ), 1.63 (3H, s);  $^{13}\text{C}$  NMR ( $\text{DMSO}-d_6$ )  $\delta$  157.7, 144.2, 130.0, 128.9, 128.8, 128.4, 127.3, 126.8, 124.7, 90.2, 82.1, 20.6; IR (neat) 3295, 1568, 1496, 1448, 1350, 1049, 928, 919, 757, 697  $\text{cm}^{-1}$ ; MS ( $\text{ESI}^+$ )  $m/z$  (%): 254 ( $[\text{M}+\text{H}]^+$ , 100);  $[\alpha]_{\text{D}}^{23}$  -35 ( $\text{CHCl}_3$ ,  $c$  0.12); chiral HPLC analysis (Chiralcel AS-H,  $i\text{PrOH}:n\text{-Hex}=10/90$ , flow rate = 1.0 mL/min,  $\lambda = 254$  nm),  $t_{\text{r}}$  (minor) = 8.8 min,  $t_{\text{r}}$  (major) = 11.8 min.

## 7. References

- 1) (a) Schilling, B.; Kaufmann, D. E. *Eur. J. Org. Chem.* **1998**, 701. (b) Morrison, D. J.; Piers, W. E.; Parvez, M. *Synlett*, **2004**, 13, 2429.
- 2) (a) Brown, K. J.; Berry, M. S.; Murdoch, J. R. *J. Org. Chem.* **1985**, 50, 4345. (b) Usanov, D. L.; Yamamoto, H. *Angew. Chem. Int. Ed.* **2010**, 49, 8169.
- 3) Saitoh, Y.; Koizumi, T.; Osakada, K.; Yamamoto, T. *Can. J. Chem.* **1997**, 75, 1336.
- 4) Case, F. H.; Sasin, R. *J. Org. Chem.* **1955**, 20, 1330.
- 5) Lu, S.-M.; Bolm, C. *Chem. Eur. J.* **2008**, 14, 7513.
- 6) Levai, A. *Monatsh. Chem.* **1995**, 126, 1245.
- 7) Kanazawa, Y.; Tsuchiya, Y.; Kobayashi, K.; Shiomi, T.; Itoh, J.-i.; Kikuchi, M.; Yamamoto, Y.; Nishiyama, H. *Chem. Eur. J.* **2005**, 12, 63.
- 8) (a) Adam, W.; Rao, P.; Degen, H.-G.; Saha-Möller, C. *Eur. J. Org. Chem.* **2002**, 630. (b) Domagala, J. M.; Bach, R. D. *J. Am. Chem. Soc.* **1978**, 100, 1605.
- 9) Moiseev, A. G.; Neckers, D. C. *Synthesis*, **2005**, 2901.
- 10) (a) Brandes, B. D.; Jacobsen, E. N. *J. Org. Chem.* **1994**, 59, 4378-4380. (b) Wang, Z. X.; Tu, Y.;

Frohn, M.; Zhang, J. R.; Shi, Y. *J. Am. Chem. Soc.* **1997**, *119*, 11224.

#### 8. Complete ref 17a.

Olson, R. E.; Sielecki, T. M.; Wityak, J.; Pinto, D. J.; Balt, D. G.; Frieze, W. E.; Liu, J.; Tobin, A. E.; Orwat, M. J.; Di Meo, S. V.; Houghton, G. C.; Lalka, G. K.; Mousa, S. A.; Racanelli, A. L.; Hausner, E. A.; Kapil, R. P.; Rabel, S. R.; Thoolen, M. J.; Reilly, T. M.; Anderson, P. S.; Wexler, R. R. *J. Med. Chem.* **1999**, *42*, 1178.

#### 9. X-ray crystallographic analysis of $[\text{Fe}(\text{L3})_2(\text{CH}_3\text{CN})(\text{OTf})](\text{OTf})$

$[\text{Fe}(\text{L3})_2(\text{CH}_3\text{CN})(\text{OTf})](\text{OTf})$ : To *rac*-**L3** (30 mg, 0.051 mmol) was added  $\text{Fe}(\text{OTf})_2$  (0.025 M solution in  $\text{CH}_3\text{CN}$ , 1.0 mL) and  $\text{CH}_3\text{CN}$  (0.5 mL) at room temperature under nitrogen atmosphere. After being stirred for 3 h at the same temperature, the solution was placed without stirring. Crystals were observed after 1 week, which were collected by filtration, washed with cold ether, and dried under nitrogen stream to yield the title compound as crystal (9.1 mg, 25% yield). MS (ESI<sup>+</sup>) *m/z* (%): 612 ( $[\text{Fe}(\text{L3})_2]^{2+}$ , 20).

The obtained crystal was tested for the epoxidation as follows: A suspension of the obtained crystal (6.1 mg, 4.3  $\mu\text{mol}$ ) and **1a** (19 mg, 86.2  $\mu\text{mol}$ ) in  $\text{CH}_3\text{CN}$  (0.34 mL) was cooled in ice bath. To the suspension,  $\text{CH}_3\text{CO}_3\text{H}$  (32 wt% solution in  $\text{CH}_3\text{CO}_2\text{H}$ , 27  $\mu\text{L}$ , 0.129 mmol) was rapidly added. After being stirred in ice bath for 30 min, the reaction was quenched and purified by the same way as described in general procedure of the epoxidation to afford the  $\alpha,\beta$ -epoxyketone **2a** (12 mg, 58% yield).



**Crystal Structure Report for Nish02**  
 **$C_{88}H_{56}FeN_4 + 2C_2H_3N + 2CF_3O_3S + 2O$**

**Report Prepared for:**  
**Yasuhiro Nishikawa and Mr. H. Yamamoto**

**September, 2010**

Ian Steele (steele@geosci.uchicago.edu)  
X-ray Laboratory, Searle B013, 773-834-5861  
Department of Chemistry  
The University of Chicago  
5735 S. Ellis Ave.  
Chicago, IL 60637

## Crystallographic Experimental Section

### Data Collection

A well formed rhomb (0.16 x 0.12 x 0.10 mm) was selected under a stereomicroscope while immersed in Fluorolube oil to avoid possible reaction with air. The crystal was removed from the oil using a tapered glass fiber that also served to hold the crystal for data collection. The crystal was mounted and centered on a Bruker SMART APEX system at 100 K. Rotation and still images showed the diffractions to be sharp. Frames separated in reciprocal space were obtained and provided an orientation matrix and initial cell parameters. Final cell parameters were obtained from the full data set.

A “full sphere” data set was obtained which samples approximately all of reciprocal space to a resolution of 0.75 Å using 0.3° steps in  $\omega$  using 10 second integration times for each frame. Data collection was made at 100 K. Integration of intensities and refinement of cell parameters were done using SAINT [1]. Absorption corrections were applied using SADABS [1] based on redundant diffractions.

### Structure solution and refinement

The space group was determined as P1(bar) based on systematic absences and intensity statistics. Direct methods were used to locate the Fe and some C atoms from the E-map. Repeated difference Fourier maps allowed recognition of all expected C and N atoms. In addition two C<sub>2</sub>H<sub>3</sub>N and CF<sub>3</sub>O<sub>3</sub>S molecules were present, one of the former bonded to Fe through its N atom and one of the latter bonded to Fe through an O atom. In addition two isolated atoms are present which were assigned as O with occupancies of 0.73 and 0.44; presumably these are H<sub>2</sub>O molecules. Following anisotropic refinement of all non-H atoms, ideal H-atom positions were calculated except for the two isolated O atoms. Final refinement was anisotropic for all non-H atoms, and isotropic-riding for H atoms. The C<sub>2</sub>H<sub>3</sub>N and CF<sub>3</sub>O<sub>3</sub>S molecules bonded to Fe showed moderate disorder while those not bonded molecules showed severe disorder. No other anomalous bond lengths or thermal parameters were noted. All ORTEP diagrams have been drawn with 50% probability ellipsoids.

**Equations of interest:**

$$R_{\text{int}} = \Sigma |F_o^2 - \langle F_o^2 \rangle| / \Sigma |F_o^2|$$

$$R1 = \Sigma ||F_o| - |F_c|| / \Sigma |F_o|$$

$$wR2 = [\Sigma [w (F_o^2 - F_c^2)^2] / \Sigma [w (F_o^2)^2]]^{1/2}$$

$$\text{GooF} = S = [\Sigma [w (F_o^2 - F_c^2)^2] / (n-p)]^{1/2}$$

$$\text{where: } w = q / \sigma^2 (F_o^2) + (aP)^2 + bP;$$

n = number of independent reflections;

q, a, b, P as defined in [1]

p = number of parameters refined.

**References**

[1] All software and sources of scattering factors are contained in the SHELXTL (version 5.1) program library (G. Sheldrick, Bruker Analytical X-ray Systems, Madison, WI).

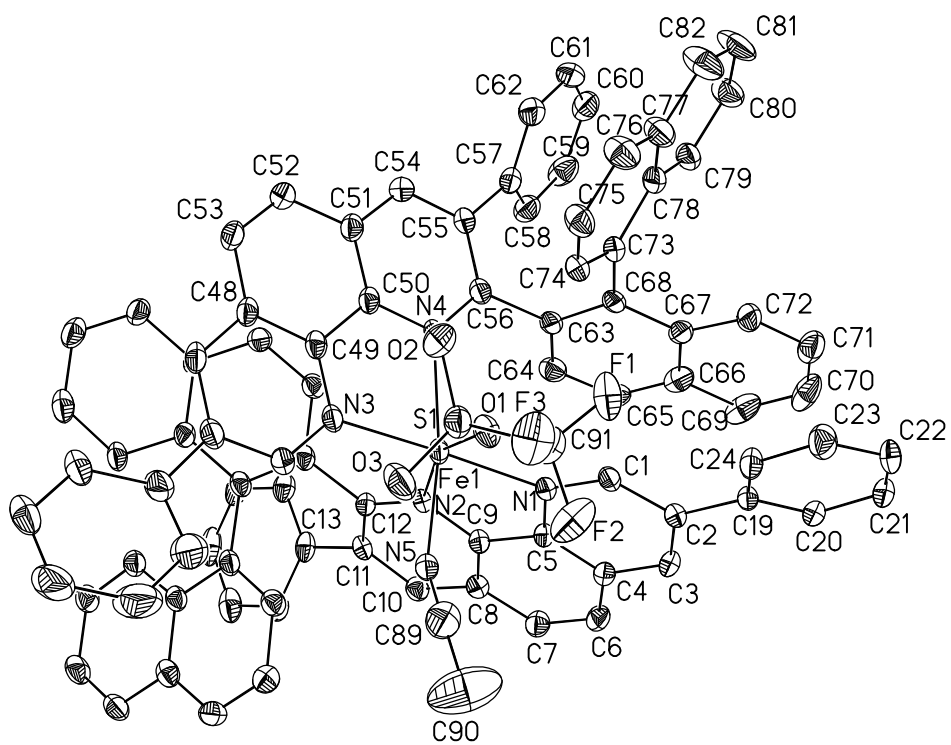

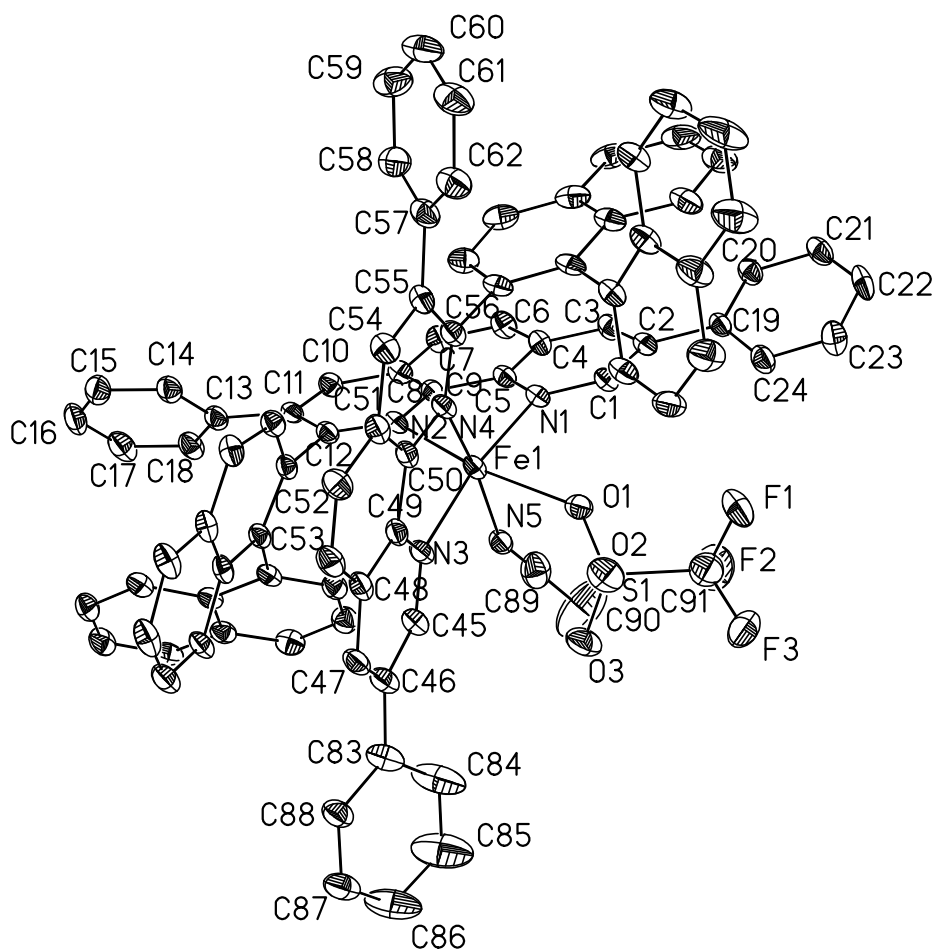

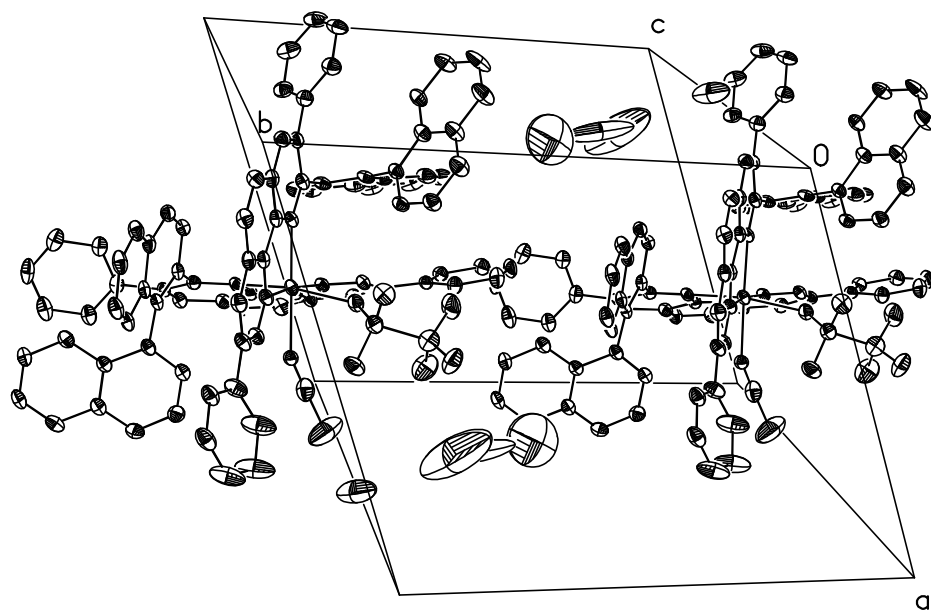

Table 1. Crystal and structure refinement for Nish02.

|                                          |                                                                                                                |                             |
|------------------------------------------|----------------------------------------------------------------------------------------------------------------|-----------------------------|
| Identification Code                      | Nish02                                                                                                         |                             |
| Empirical formula                        | $C_{88}H_{56}FeN_4 + 2C_2H_3N + 2CF_3O_3S + 2O$                                                                |                             |
| Formula weight                           | 1621.47                                                                                                        |                             |
| Temperature                              | 100 K                                                                                                          |                             |
| Wavelength                               | 0.71073 Å                                                                                                      |                             |
| Crystal system                           | Triclinic                                                                                                      |                             |
| Space Group                              | P1(bar)                                                                                                        |                             |
| Unit cell dimensions                     | $a = 12.581(2)$ Å                                                                                              | $\alpha = 108.511(3)^\circ$ |
|                                          | $b = 16.682(3)$ Å                                                                                              | $\beta = 90.726(3)^\circ$   |
|                                          | $c = 21.338(4)$ Å                                                                                              | $\gamma = 112.000(3)^\circ$ |
| Volume                                   | 3892.9(12) Å <sup>3</sup>                                                                                      |                             |
| Z                                        | 2                                                                                                              |                             |
| Density (calculated)                     | 1.383 Mg/m <sup>3</sup>                                                                                        |                             |
| Absorption coefficient                   | 0.325 mm <sup>-1</sup>                                                                                         |                             |
| F(000)                                   | 1672                                                                                                           |                             |
| Crystal size, color, habit               | 0.16 x 0.12 x 0.10 mm, pale yellow, rhomb                                                                      |                             |
| Theta range for data collection          | 1.76 – 28.35 °                                                                                                 |                             |
| Index ranges                             | -16 ≤ h ≤ 16, -22 ≤ k ≤ 22, -28 ≤ l ≤ 27                                                                       |                             |
| Reflections collected                    | 47,447                                                                                                         |                             |
| Independent reflections                  | 18,748 (R <sub>int</sub> = 0.0288)                                                                             |                             |
| Reflections with I > 4σ(F <sub>o</sub> ) | 10,808                                                                                                         |                             |
| Absorption correction                    | SADABS based on redundant diffractions                                                                         |                             |
| Max. and min. transmission               | 1.0, 0.849                                                                                                     |                             |
| Refinement method                        | Full-matrix least squares on F <sup>2</sup>                                                                    |                             |
| Weighting scheme                         | $w = q [\sigma^2 (F_o^2) + (aP)^2 + bP]^{-1}$ where:<br>$P = (F_o^2 + 2 F_c^2)/3$ , a = 0.0783, b = 0.0, q = 1 |                             |
| Data / restraints / parameters           | 18748 / 0 / 1058                                                                                               |                             |
| Goodness-of-fit on F <sup>2</sup>        | 0.897                                                                                                          |                             |
| Final R indices [I > 2 sigma(I)]         | R1 = 0.0632, wR2 = 0.1515                                                                                      |                             |
| R indices (all data)                     | R1 = 0.1084, wR2 = 0.1684                                                                                      |                             |
| Largest diff. peak and hole              | 1.338, -0.579 eÅ <sup>-3</sup>                                                                                 |                             |

Table 2. Atomic coordinates [ $\times 10^4$ ] and equivalent isotropic displacement parameters [ $\text{\AA}^2 \times 10^3$ ] for Nish02.  $U(\text{eq})$  is defined as one third of the trace of the orthogonalized  $U_{ij}$  tensor.

|       | x        | y        | z        | U(eq) | SOF |
|-------|----------|----------|----------|-------|-----|
| C(1)  | 6278(3)  | -1576(2) | 7885(2)  | 21(1) |     |
| C(2)  | 6604(3)  | -1948(2) | 8325(2)  | 21(1) |     |
| C(3)  | 7134(3)  | -1340(2) | 8963(2)  | 23(1) |     |
| C(4)  | 7311(3)  | -410(2)  | 9153(2)  | 22(1) |     |
| C(5)  | 6932(3)  | -114(2)  | 8677(2)  | 20(1) |     |
| C(6)  | 7820(3)  | 236(2)   | 9811(2)  | 26(1) |     |
| C(7)  | 7948(3)  | 1123(2)  | 9974(2)  | 25(1) |     |
| C(8)  | 7564(3)  | 1437(2)  | 9501(2)  | 23(1) |     |
| C(9)  | 7046(3)  | 819(2)   | 8853(2)  | 20(1) |     |
| C(10) | 7626(3)  | 2338(2)  | 9662(2)  | 23(1) |     |
| C(11) | 7155(3)  | 2590(2)  | 9210(2)  | 20(1) |     |
| C(12) | 6672(3)  | 1925(2)  | 8561(2)  | 19(1) |     |
| C(13) | 7126(3)  | 3519(2)  | 9427(2)  | 25(1) |     |
| C(14) | 6090(3)  | 3614(2)  | 9345(2)  | 27(1) |     |
| C(15) | 6051(3)  | 4476(2)  | 9596(2)  | 33(1) |     |
| C(16) | 7041(4)  | 5247(2)  | 9926(2)  | 37(1) |     |
| C(17) | 8079(3)  | 5160(2)  | 10012(2) | 36(1) |     |
| C(18) | 8120(3)  | 4298(2)  | 9766(2)  | 28(1) |     |
| C(19) | 6337(3)  | -2946(2) | 8112(2)  | 20(1) |     |
| C(20) | 6284(3)  | -3371(2) | 8582(2)  | 24(1) |     |
| C(21) | 5967(3)  | -4318(2) | 8374(2)  | 28(1) |     |
| C(22) | 5717(3)  | -4849(2) | 7707(2)  | 33(1) |     |
| C(23) | 5797(3)  | -4425(2) | 7236(2)  | 34(1) |     |
| C(24) | 6111(3)  | -3485(2) | 7435(2)  | 27(1) |     |
| C(25) | 6168(3)  | 2166(2)  | 8041(1)  | 20(1) |     |
| C(26) | 4946(3)  | 1787(2)  | 7888(2)  | 22(1) |     |
| C(27) | 4417(3)  | 1996(2)  | 7438(2)  | 25(1) |     |
| C(28) | 5086(3)  | 2544(2)  | 7085(2)  | 23(1) |     |
| C(29) | 6318(3)  | 2918(2)  | 7229(2)  | 21(1) |     |
| C(30) | 6857(3)  | 2765(2)  | 7747(2)  | 20(1) |     |
| C(31) | 4556(3)  | 2698(2)  | 6569(2)  | 28(1) |     |
| C(32) | 5214(3)  | 3182(2)  | 6198(2)  | 31(1) |     |
| C(33) | 6424(3)  | 3541(2)  | 6336(2)  | 29(1) |     |
| C(34) | 6969(3)  | 3424(2)  | 6837(2)  | 24(1) |     |
| C(35) | 8142(3)  | 3226(2)  | 7954(2)  | 21(1) |     |
| C(36) | 8778(3)  | 2707(2)  | 7908(2)  | 24(1) |     |
| C(37) | 9981(3)  | 3101(2)  | 8106(2)  | 29(1) |     |
| C(38) | 10559(3) | 4041(2)  | 8352(2)  | 28(1) |     |
| C(39) | 9946(3)  | 4612(2)  | 8418(2)  | 24(1) |     |
| C(40) | 8727(3)  | 4213(2)  | 8226(2)  | 21(1) |     |
| C(41) | 10528(3) | 5586(2)  | 8684(2)  | 28(1) |     |
| C(42) | 9925(3)  | 6134(2)  | 8771(2)  | 29(1) |     |
| C(43) | 8723(3)  | 5738(2)  | 8595(2)  | 27(1) |     |
| C(44) | 8131(3)  | 4803(2)  | 8332(2)  | 25(1) |     |
| C(45) | 7099(3)  | 1010(2)  | 6380(2)  | 24(1) |     |
| C(46) | 7005(3)  | 1311(2)  | 5842(2)  | 26(1) |     |
| C(47) | 5910(3)  | 1157(2)  | 5591(2)  | 25(1) |     |
| C(48) | 4938(3)  | 707(2)   | 5848(2)  | 23(1) |     |



|       |          |          |          |         |
|-------|----------|----------|----------|---------|
| C(49) | 5121(3)  | 404(2)   | 6371(2)  | 21(1)   |
| C(50) | 4147(3)  | -106(2)  | 6626(2)  | 20(1)   |
| C(51) | 3035(3)  | -251(2)  | 6373(2)  | 23(1)   |
| C(52) | 2879(3)  | 93(2)    | 5861(2)  | 26(1)   |
| C(53) | 3792(3)  | 543(2)   | 5605(2)  | 26(1)   |
| C(54) | 2103(3)  | -712(2)  | 6654(2)  | 25(1)   |
| C(55) | 2277(3)  | -1028(2) | 7150(2)  | 23(1)   |
| C(56) | 3424(3)  | -903(2)  | 7349(2)  | 21(1)   |
| C(57) | 1270(3)  | -1469(2) | 7460(2)  | 26(1)   |
| C(58) | 1276(3)  | -1123(2) | 8147(2)  | 30(1)   |
| C(59) | 303(3)   | -1503(3) | 8423(2)  | 37(1)   |
| C(60) | -671(3)  | -2232(3) | 8023(2)  | 38(1)   |
| C(61) | -689(3)  | -2571(3) | 7338(2)  | 36(1)   |
| C(62) | 275(3)   | -2185(2) | 7055(2)  | 32(1)   |
| C(63) | 3624(3)  | -1331(2) | 7833(2)  | 22(1)   |
| C(64) | 4057(3)  | -765(2)  | 8507(2)  | 26(1)   |
| C(65) | 4209(3)  | -1144(2) | 8967(2)  | 30(1)   |
| C(66) | 3962(3)  | -2090(3) | 8777(2)  | 30(1)   |
| C(67) | 3523(3)  | -2667(2) | 8103(2)  | 25(1)   |
| C(68) | 3331(3)  | -2270(2) | 7626(2)  | 22(1)   |
| C(69) | 4168(3)  | -2485(3) | 9243(2)  | 38(1)   |
| C(70) | 3925(3)  | -3405(3) | 9046(2)  | 43(1)   |
| C(71) | 3512(3)  | -3966(3) | 8381(2)  | 38(1)   |
| C(72) | 3333(3)  | -3607(2) | 7918(2)  | 31(1)   |
| C(73) | 2894(3)  | -2874(2) | 6910(2)  | 22(1)   |
| C(74) | 3583(3)  | -2721(2) | 6431(2)  | 25(1)   |
| C(75) | 3260(3)  | -3307(2) | 5758(2)  | 30(1)   |
| C(76) | 2233(3)  | -4062(2) | 5568(2)  | 35(1)   |
| C(77) | 1482(3)  | -4242(2) | 6032(2)  | 33(1)   |
| C(78) | 1786(3)  | -3643(2) | 6712(2)  | 26(1)   |
| C(79) | 994(3)   | -3832(2) | 7160(2)  | 28(1)   |
| C(80) | -33(3)   | -4595(2) | 6956(2)  | 36(1)   |
| C(81) | -314(3)  | -5203(3) | 6287(2)  | 47(1)   |
| C(82) | 416(3)   | -5029(3) | 5838(2)  | 44(1)   |
| C(83) | 8041(3)  | 1725(2)  | 5550(2)  | 33(1)   |
| C(84) | 9004(3)  | 1507(3)  | 5588(2)  | 60(1)   |
| C(85) | 9942(4)  | 1844(4)  | 5270(2)  | 74(2)   |
| C(86) | 9919(4)  | 2399(3)  | 4904(2)  | 61(1)   |
| C(87) | 8968(3)  | 2584(2)  | 4844(2)  | 36(1)   |
| C(88) | 8034(3)  | 2248(2)  | 5158(2)  | 31(1)   |
| C(89) | 9000(4)  | 333(3)   | 7441(2)  | 41(1)   |
| C(90) | 10087(5) | 183(5)   | 7379(3)  | 103(2)  |
| C(91) | 6887(3)  | -2414(3) | 5791(2)  | 39(1)   |
| C(92) | 1514(7)  | 2463(15) | 6764(3)  | 227(11) |
| C(93) | 1813(11) | 3630(8)  | 6786(5)  | 242(8)  |
| C(94) | 1136(4)  | 1644(3)  | 9398(2)  | 58(1)   |
| F(1)  | 6022(2)  | -3091(1) | 5887(1)  | 48(1)   |
| F(2)  | 7802(2)  | -2209(2) | 6227(1)  | 60(1)   |
| F(3)  | 7135(2)  | -2711(2) | 5179(1)  | 51(1)   |
| F(4)  | 357(3)   | 832(3)   | 9108(2)  | 161(2)  |
| F(5)  | 699(3)   | 2167(4)  | 9258(3)  | 169(2)  |
| F(6)  | 1148(3)  | 1819(4)  | 10023(2) | 144(2)  |
| Fe(1) | 6250(1)  | -18(1)   | 7383(1)  | 20(1)   |
| N(1)  | 6436(2)  | -701(2)  | 8045(1)  | 19(1)   |
| N(2)  | 6622(2)  | 1069(2)  | 8386(1)  | 19(1)   |
| N(3)  | 6202(2)  | 571(2)   | 6637(1)  | 21(1)   |
| N(4)  | 4344(2)  | -431(2)  | 7111(1)  | 20(1)   |

|      |          |          |         |         |      |
|------|----------|----------|---------|---------|------|
| N(5) | 8158(2)  | 430(2)   | 7463(1) | 23(1)   |      |
| N(6) | 1521(14) | 2031(14) | 6880(9) | 348(11) |      |
| O(1) | 6290(2)  | -1202(1) | 6598(1) | 27(1)   |      |
| O(2) | 5542(2)  | -1746(2) | 5431(1) | 36(1)   |      |
| O(3) | 7587(2)  | -739(2)  | 5817(1) | 39(1)   |      |
| O(4) | 2306(4)  | 1594(5)  | 8460(2) | 196(3)  |      |
| O(5) | 2831(4)  | 1165(3)  | 9310(2) | 107(2)  |      |
| O(6) | 3217(3)  | 2695(2)  | 9513(3) | 180(3)  |      |
| O(7) | 3163(5)  | 3627(4)  | 8278(3) | 95(3)   | 0.73 |
| O(8) | 9971(7)  | 9968(7)  | 5681(5) | 103(5)  | 0.44 |
| S(1) | 6542(1)  | -1409(1) | 5917(1) | 28(1)   |      |
| S(2) | 2522(1)  | 1790(1)  | 9141(1) | 50(1)   |      |

---

Table 3. Bond lengths [Å] and angles [°] for Nish02.

---

|             |          |             |          |
|-------------|----------|-------------|----------|
| C(1)-N(1)   | 1.324(4) | C(45)-N(3)  | 1.328(4) |
| C(1)-C(2)   | 1.407(4) | C(45)-C(46) | 1.409(4) |
| C(2)-C(3)   | 1.385(4) | C(46)-C(47) | 1.371(4) |
| C(2)-C(19)  | 1.480(4) | C(46)-C(83) | 1.478(4) |
| C(3)-C(4)   | 1.401(4) | C(47)-C(48) | 1.397(4) |
| C(4)-C(5)   | 1.409(4) | C(48)-C(49) | 1.411(4) |
| C(4)-C(6)   | 1.429(4) | C(48)-C(53) | 1.420(4) |
| C(5)-N(1)   | 1.359(4) | C(49)-N(3)  | 1.358(4) |
| C(5)-C(9)   | 1.429(4) | C(49)-C(50) | 1.432(4) |
| C(6)-C(7)   | 1.352(4) | C(50)-N(4)  | 1.370(4) |
| C(7)-C(8)   | 1.430(4) | C(50)-C(51) | 1.397(4) |
| C(8)-C(10)  | 1.401(4) | C(51)-C(54) | 1.400(4) |
| C(8)-C(9)   | 1.402(4) | C(51)-C(52) | 1.430(4) |
| C(9)-N(2)   | 1.367(4) | C(52)-C(53) | 1.345(4) |
| C(10)-C(11) | 1.375(4) | C(54)-C(55) | 1.372(4) |
| C(11)-C(12) | 1.419(4) | C(55)-C(56) | 1.418(4) |
| C(11)-C(13) | 1.485(4) | C(55)-C(57) | 1.488(4) |
| C(12)-N(2)  | 1.332(4) | C(56)-N(4)  | 1.343(4) |
| C(12)-C(25) | 1.502(4) | C(56)-C(63) | 1.495(4) |
| C(13)-C(14) | 1.387(5) | C(57)-C(62) | 1.392(4) |
| C(13)-C(18) | 1.392(4) | C(57)-C(58) | 1.395(5) |
| C(14)-C(15) | 1.386(4) | C(58)-C(59) | 1.385(5) |
| C(15)-C(16) | 1.380(5) | C(59)-C(60) | 1.381(5) |
| C(16)-C(17) | 1.383(5) | C(60)-C(61) | 1.386(5) |
| C(17)-C(18) | 1.386(5) | C(61)-C(62) | 1.389(5) |
| C(19)-C(20) | 1.390(4) | C(63)-C(68) | 1.382(4) |
| C(19)-C(24) | 1.397(4) | C(63)-C(64) | 1.410(4) |
| C(20)-C(21) | 1.389(4) | C(64)-C(65) | 1.371(4) |
| C(21)-C(22) | 1.375(5) | C(65)-C(66) | 1.405(5) |
| C(22)-C(23) | 1.385(5) | C(66)-C(67) | 1.415(5) |
| C(23)-C(24) | 1.379(4) | C(66)-C(69) | 1.424(4) |
| C(25)-C(30) | 1.381(4) | C(67)-C(72) | 1.412(4) |
| C(25)-C(26) | 1.413(4) | C(67)-C(68) | 1.441(4) |
| C(26)-C(27) | 1.361(4) | C(68)-C(73) | 1.496(4) |
| C(27)-C(28) | 1.411(4) | C(69)-C(70) | 1.365(5) |
| C(28)-C(31) | 1.418(4) | C(70)-C(71) | 1.391(5) |
| C(28)-C(29) | 1.424(4) | C(71)-C(72) | 1.365(4) |
| C(29)-C(34) | 1.424(4) | C(73)-C(74) | 1.372(4) |
| C(29)-C(30) | 1.426(4) | C(73)-C(78) | 1.438(4) |
| C(30)-C(35) | 1.495(4) | C(74)-C(75) | 1.406(4) |
| C(31)-C(32) | 1.373(5) | C(75)-C(76) | 1.365(5) |
| C(32)-C(33) | 1.399(5) | C(76)-C(77) | 1.402(5) |
| C(33)-C(34) | 1.367(4) | C(77)-C(82) | 1.420(5) |
| C(35)-C(36) | 1.367(4) | C(77)-C(78) | 1.425(5) |
| C(35)-C(40) | 1.436(4) | C(78)-C(79) | 1.409(4) |
| C(36)-C(37) | 1.401(4) | C(79)-C(80) | 1.371(4) |
| C(37)-C(38) | 1.370(5) | C(80)-C(81) | 1.411(5) |
| C(38)-C(39) | 1.411(4) | C(81)-C(82) | 1.358(5) |
| C(39)-C(40) | 1.418(4) | C(83)-C(88) | 1.389(5) |
| C(39)-C(41) | 1.418(4) | C(83)-C(84) | 1.398(5) |
| C(40)-C(44) | 1.413(4) | C(84)-C(85) | 1.390(6) |
| C(41)-C(42) | 1.363(5) | C(85)-C(86) | 1.395(6) |
| C(42)-C(43) | 1.395(4) | C(86)-C(87) | 1.358(6) |
| C(43)-C(44) | 1.366(4) | C(87)-C(88) | 1.380(5) |

|                   |          |                   |          |
|-------------------|----------|-------------------|----------|
| C(89)-N(5)        | 1.129(4) | Fe(1)-N(3)        | 2.132(2) |
| C(89)-C(90)       | 1.480(6) | Fe(1)-N(1)        | 2.136(2) |
| C(91)-F(1)        | 1.317(4) | Fe(1)-O(1)        | 2.166(2) |
| C(91)-F(3)        | 1.328(4) | Fe(1)-N(5)        | 2.217(3) |
| C(91)-F(2)        | 1.336(4) | Fe(1)-N(2)        | 2.227(2) |
| C(91)-S(1)        | 1.826(4) | Fe(1)-N(4)        | 2.245(3) |
| C(92)-N(6)        | 0.84(3)  | O(1)-S(1)         | 1.451(2) |
| C(92)-C(93)       | 1.82(2)  | O(2)-S(1)         | 1.429(2) |
| C(94)-F(6)        | 1.270(5) | O(3)-S(1)         | 1.442(2) |
| C(94)-F(4)        | 1.279(5) | O(4)-S(2)         | 1.384(4) |
| C(94)-F(5)        | 1.294(5) | O(5)-S(2)         | 1.381(4) |
| C(94)-S(2)        | 1.787(5) | O(6)-S(2)         | 1.381(4) |
|                   |          |                   |          |
| N(1)-C(1)-C(2)    | 124.4(3) | C(31)-C(28)-C(29) | 119.3(3) |
| C(3)-C(2)-C(1)    | 116.6(3) | C(28)-C(29)-C(34) | 118.1(3) |
| C(3)-C(2)-C(19)   | 122.8(3) | C(28)-C(29)-C(30) | 119.6(3) |
| C(1)-C(2)-C(19)   | 120.6(3) | C(34)-C(29)-C(30) | 122.3(3) |
| C(2)-C(3)-C(4)    | 120.8(3) | C(25)-C(30)-C(29) | 118.5(3) |
| C(3)-C(4)-C(5)    | 118.0(3) | C(25)-C(30)-C(35) | 120.8(3) |
| C(3)-C(4)-C(6)    | 122.8(3) | C(29)-C(30)-C(35) | 120.7(3) |
| C(5)-C(4)-C(6)    | 119.1(3) | C(32)-C(31)-C(28) | 120.9(3) |
| N(1)-C(5)-C(4)    | 121.6(3) | C(31)-C(32)-C(33) | 119.7(3) |
| N(1)-C(5)-C(9)    | 118.1(3) | C(34)-C(33)-C(32) | 121.2(3) |
| C(4)-C(5)-C(9)    | 120.3(3) | C(33)-C(34)-C(29) | 120.8(3) |
| C(7)-C(6)-C(4)    | 120.6(3) | C(36)-C(35)-C(40) | 118.7(3) |
| C(6)-C(7)-C(8)    | 121.2(3) | C(36)-C(35)-C(30) | 120.0(3) |
| C(10)-C(8)-C(9)   | 117.4(3) | C(40)-C(35)-C(30) | 121.3(3) |
| C(10)-C(8)-C(7)   | 122.8(3) | C(35)-C(36)-C(37) | 122.5(3) |
| C(9)-C(8)-C(7)    | 119.7(3) | C(38)-C(37)-C(36) | 119.7(3) |
| N(2)-C(9)-C(8)    | 122.4(3) | C(37)-C(38)-C(39) | 120.3(3) |
| N(2)-C(9)-C(5)    | 118.6(3) | C(38)-C(39)-C(40) | 120.0(3) |
| C(8)-C(9)-C(5)    | 119.0(3) | C(38)-C(39)-C(41) | 121.0(3) |
| C(11)-C(10)-C(8)  | 121.0(3) | C(40)-C(39)-C(41) | 119.0(3) |
| C(10)-C(11)-C(12) | 117.6(3) | C(44)-C(40)-C(39) | 118.5(3) |
| C(10)-C(11)-C(13) | 119.1(3) | C(44)-C(40)-C(35) | 122.6(3) |
| C(12)-C(11)-C(13) | 123.2(3) | C(39)-C(40)-C(35) | 118.8(3) |
| N(2)-C(12)-C(11)  | 122.9(3) | C(42)-C(41)-C(39) | 120.8(3) |
| N(2)-C(12)-C(25)  | 117.0(3) | C(41)-C(42)-C(43) | 120.0(3) |
| C(11)-C(12)-C(25) | 120.1(3) | C(44)-C(43)-C(42) | 121.0(3) |
| C(14)-C(13)-C(18) | 119.1(3) | C(43)-C(44)-C(40) | 120.7(3) |
| C(14)-C(13)-C(11) | 120.4(3) | N(3)-C(45)-C(46)  | 124.2(3) |
| C(18)-C(13)-C(11) | 120.3(3) | C(47)-C(46)-C(45) | 116.7(3) |
| C(15)-C(14)-C(13) | 120.1(3) | C(47)-C(46)-C(83) | 122.5(3) |
| C(16)-C(15)-C(14) | 120.4(3) | C(45)-C(46)-C(83) | 120.7(3) |
| C(15)-C(16)-C(17) | 119.9(3) | C(46)-C(47)-C(48) | 121.3(3) |
| C(16)-C(17)-C(18) | 119.8(3) | C(47)-C(48)-C(49) | 117.6(3) |
| C(17)-C(18)-C(13) | 120.6(3) | C(47)-C(48)-C(53) | 123.0(3) |
| C(20)-C(19)-C(24) | 118.6(3) | C(49)-C(48)-C(53) | 119.4(3) |
| C(20)-C(19)-C(2)  | 120.7(3) | N(3)-C(49)-C(48)  | 121.8(3) |
| C(24)-C(19)-C(2)  | 120.7(3) | N(3)-C(49)-C(50)  | 118.5(3) |
| C(21)-C(20)-C(19) | 119.9(3) | C(48)-C(49)-C(50) | 119.7(3) |
| C(22)-C(21)-C(20) | 121.2(3) | N(4)-C(50)-C(51)  | 122.4(3) |
| C(21)-C(22)-C(23) | 119.0(3) | N(4)-C(50)-C(49)  | 118.6(3) |
| C(24)-C(23)-C(22) | 120.4(3) | C(51)-C(50)-C(49) | 119.0(3) |
| C(23)-C(24)-C(19) | 120.7(3) | C(50)-C(51)-C(54) | 117.8(3) |
| C(30)-C(25)-C(26) | 121.1(3) | C(50)-C(51)-C(52) | 120.1(3) |
| C(30)-C(25)-C(12) | 121.9(3) | C(54)-C(51)-C(52) | 122.0(3) |
| C(26)-C(25)-C(12) | 116.9(3) | C(53)-C(52)-C(51) | 120.8(3) |
| C(27)-C(26)-C(25) | 120.7(3) | C(52)-C(53)-C(48) | 121.0(3) |
| C(26)-C(27)-C(28) | 120.2(3) | C(55)-C(54)-C(51) | 120.9(3) |
| C(27)-C(28)-C(31) | 121.2(3) | C(54)-C(55)-C(56) | 117.7(3) |
| C(27)-C(28)-C(29) | 119.4(3) | C(54)-C(55)-C(57) | 119.1(3) |

|                   |          |                  |            |
|-------------------|----------|------------------|------------|
| C(56)-C(55)-C(57) | 123.2(3) | F(1)-C(91)-F(3)  | 109.1(3)   |
| N(4)-C(56)-C(55)  | 122.8(3) | F(1)-C(91)-F(2)  | 106.5(3)   |
| N(4)-C(56)-C(63)  | 118.2(3) | F(3)-C(91)-F(2)  | 108.0(3)   |
| C(55)-C(56)-C(63) | 119.0(3) | F(1)-C(91)-S(1)  | 111.4(3)   |
| C(62)-C(57)-C(58) | 119.4(3) | F(3)-C(91)-S(1)  | 110.9(3)   |
| C(62)-C(57)-C(55) | 119.8(3) | F(2)-C(91)-S(1)  | 110.8(3)   |
| C(58)-C(57)-C(55) | 120.6(3) | N(6)-C(92)-C(93) | 160.4(19)  |
| C(59)-C(58)-C(57) | 120.0(3) | F(6)-C(94)-F(4)  | 106.9(5)   |
| C(60)-C(59)-C(58) | 120.5(3) | F(6)-C(94)-F(5)  | 105.2(5)   |
| C(59)-C(60)-C(61) | 119.9(3) | F(4)-C(94)-F(5)  | 103.3(5)   |
| C(60)-C(61)-C(62) | 120.1(3) | F(6)-C(94)-S(2)  | 113.6(3)   |
| C(61)-C(62)-C(57) | 120.1(3) | F(4)-C(94)-S(2)  | 113.4(4)   |
| C(68)-C(63)-C(64) | 121.2(3) | F(5)-C(94)-S(2)  | 113.6(4)   |
| C(68)-C(63)-C(56) | 120.1(3) | N(3)-Fe(1)-N(1)  | 171.91(10) |
| C(64)-C(63)-C(56) | 118.6(3) | N(3)-Fe(1)-O(1)  | 87.68(9)   |
| C(65)-C(64)-C(63) | 119.9(3) | N(1)-Fe(1)-O(1)  | 85.36(9)   |
| C(64)-C(65)-C(66) | 121.1(3) | N(3)-Fe(1)-N(5)  | 92.12(10)  |
| C(65)-C(66)-C(67) | 119.6(3) | N(1)-Fe(1)-N(5)  | 82.84(9)   |
| C(65)-C(66)-C(69) | 121.7(3) | O(1)-Fe(1)-N(5)  | 81.89(9)   |
| C(67)-C(66)-C(69) | 118.7(3) | N(3)-Fe(1)-N(2)  | 108.77(9)  |
| C(72)-C(67)-C(66) | 118.6(3) | N(1)-Fe(1)-N(2)  | 77.22(9)   |
| C(72)-C(67)-C(68) | 122.3(3) | O(1)-Fe(1)-N(2)  | 159.52(9)  |
| C(66)-C(67)-C(68) | 119.1(3) | N(5)-Fe(1)-N(2)  | 85.29(9)   |
| C(63)-C(68)-C(67) | 119.0(3) | N(3)-Fe(1)-N(4)  | 77.36(9)   |
| C(63)-C(68)-C(73) | 121.6(3) | N(1)-Fe(1)-N(4)  | 107.18(9)  |
| C(67)-C(68)-C(73) | 119.2(3) | O(1)-Fe(1)-N(4)  | 93.84(9)   |
| C(70)-C(69)-C(66) | 120.7(4) | N(5)-Fe(1)-N(4)  | 168.85(9)  |
| C(69)-C(70)-C(71) | 120.4(3) | N(2)-Fe(1)-N(4)  | 101.48(9)  |
| C(72)-C(71)-C(70) | 120.5(4) | C(1)-N(1)-C(5)   | 118.6(3)   |
| C(71)-C(72)-C(67) | 121.1(4) | C(1)-N(1)-Fe(1)  | 127.4(2)   |
| C(74)-C(73)-C(78) | 118.8(3) | C(5)-N(1)-Fe(1)  | 113.26(19) |
| C(74)-C(73)-C(68) | 119.6(3) | C(12)-N(2)-C(9)  | 118.6(3)   |
| C(78)-C(73)-C(68) | 121.5(3) | C(12)-N(2)-Fe(1) | 130.7(2)   |
| C(73)-C(74)-C(75) | 122.3(3) | C(9)-N(2)-Fe(1)  | 109.65(19) |
| C(76)-C(75)-C(74) | 119.6(3) | C(45)-N(3)-C(49) | 118.3(3)   |
| C(75)-C(76)-C(77) | 120.6(3) | C(45)-N(3)-Fe(1) | 126.7(2)   |
| C(76)-C(77)-C(82) | 120.9(3) | C(49)-N(3)-Fe(1) | 114.84(19) |
| C(76)-C(77)-C(78) | 120.4(3) | C(56)-N(4)-C(50) | 118.1(3)   |
| C(82)-C(77)-C(78) | 118.8(3) | C(56)-N(4)-Fe(1) | 131.3(2)   |
| C(79)-C(78)-C(77) | 118.7(3) | C(50)-N(4)-Fe(1) | 110.65(19) |
| C(79)-C(78)-C(73) | 123.1(3) | C(89)-N(5)-Fe(1) | 155.7(3)   |
| C(77)-C(78)-C(73) | 118.2(3) | S(1)-O(1)-Fe(1)  | 136.65(13) |
| C(80)-C(79)-C(78) | 121.1(3) | O(2)-S(1)-O(3)   | 116.29(15) |
| C(79)-C(80)-C(81) | 120.0(3) | O(2)-S(1)-O(1)   | 113.14(15) |
| C(82)-C(81)-C(80) | 120.5(3) | O(3)-S(1)-O(1)   | 115.37(14) |
| C(81)-C(82)-C(77) | 120.9(3) | O(2)-S(1)-C(91)  | 103.77(17) |
| C(88)-C(83)-C(84) | 117.5(3) | O(3)-S(1)-C(91)  | 103.51(17) |
| C(88)-C(83)-C(46) | 121.1(3) | O(1)-S(1)-C(91)  | 102.35(15) |
| C(84)-C(83)-C(46) | 120.9(3) | O(6)-S(2)-O(5)   | 113.0(3)   |
| C(85)-C(84)-C(83) | 120.8(4) | O(6)-S(2)-O(4)   | 115.6(4)   |
| C(84)-C(85)-C(86) | 119.7(4) | O(5)-S(2)-O(4)   | 114.2(4)   |
| C(87)-C(86)-C(85) | 119.8(4) | O(6)-S(2)-C(94)  | 103.6(3)   |
| C(86)-C(87)-C(88) | 120.5(4) | O(5)-S(2)-C(94)  | 105.5(2)   |
| C(87)-C(88)-C(83) | 121.6(4) | O(4)-S(2)-C(94)  | 103.2(2)   |
| N(5)-C(89)-C(90)  | 177.4(4) |                  |            |

Table 4. Anisotropic displacement parameters [ $\text{\AA}^2 \times 10^3$ ] for Nish02.  
 The anisotropic displacement factor exponent takes the form:  
 $-2\pi^2[h^2a^{*2}U_{11} + \dots + 2hka^*b^*U_{12}]$

|       | U <sub>11</sub> | U <sub>22</sub> | U <sub>33</sub> | U <sub>23</sub> | U <sub>13</sub> | U <sub>12</sub> |
|-------|-----------------|-----------------|-----------------|-----------------|-----------------|-----------------|
| C(1)  | 21(2)           | 17(2)           | 22(2)           | 8(1)            | 2(1)            | 4(1)            |
| C(2)  | 19(2)           | 19(2)           | 25(2)           | 11(1)           | 3(1)            | 6(1)            |
| C(3)  | 25(2)           | 23(2)           | 27(2)           | 14(1)           | 2(1)            | 12(1)           |
| C(4)  | 22(2)           | 19(2)           | 24(2)           | 9(1)            | 0(1)            | 7(1)            |
| C(5)  | 20(2)           | 19(2)           | 22(2)           | 11(1)           | 3(1)            | 7(1)            |
| C(6)  | 30(2)           | 27(2)           | 23(2)           | 11(1)           | -3(1)           | 10(2)           |
| C(7)  | 30(2)           | 22(2)           | 22(2)           | 6(1)            | -1(1)           | 10(1)           |
| C(8)  | 21(2)           | 22(2)           | 24(2)           | 10(1)           | 3(1)            | 7(1)            |
| C(9)  | 21(2)           | 18(2)           | 22(2)           | 9(1)            | 4(1)            | 7(1)            |
| C(10) | 25(2)           | 19(2)           | 20(2)           | 6(1)            | 1(1)            | 6(1)            |
| C(11) | 22(2)           | 16(2)           | 21(2)           | 8(1)            | 6(1)            | 5(1)            |
| C(12) | 20(2)           | 19(2)           | 23(2)           | 11(1)           | 4(1)            | 8(1)            |
| C(13) | 39(2)           | 22(2)           | 19(2)           | 10(1)           | 7(1)            | 14(2)           |
| C(14) | 38(2)           | 25(2)           | 21(2)           | 10(1)           | 5(1)            | 14(2)           |
| C(15) | 52(2)           | 36(2)           | 24(2)           | 15(2)           | 11(2)           | 28(2)           |
| C(16) | 69(3)           | 24(2)           | 28(2)           | 12(2)           | 13(2)           | 26(2)           |
| C(17) | 57(3)           | 22(2)           | 23(2)           | 8(2)            | 2(2)            | 10(2)           |
| C(18) | 39(2)           | 23(2)           | 22(2)           | 9(1)            | 1(2)            | 10(2)           |
| C(19) | 18(2)           | 18(2)           | 30(2)           | 12(1)           | 4(1)            | 7(1)            |
| C(20) | 22(2)           | 23(2)           | 30(2)           | 13(1)           | 2(1)            | 10(1)           |
| C(21) | 28(2)           | 25(2)           | 38(2)           | 19(2)           | 3(2)            | 11(2)           |
| C(22) | 38(2)           | 16(2)           | 46(2)           | 12(2)           | 1(2)            | 11(2)           |
| C(23) | 42(2)           | 24(2)           | 34(2)           | 8(2)            | 1(2)            | 14(2)           |
| C(24) | 31(2)           | 22(2)           | 33(2)           | 14(2)           | 5(2)            | 12(2)           |
| C(25) | 26(2)           | 14(1)           | 18(2)           | 4(1)            | 2(1)            | 7(1)            |
| C(26) | 24(2)           | 18(2)           | 23(2)           | 7(1)            | 2(1)            | 6(1)            |
| C(27) | 23(2)           | 19(2)           | 31(2)           | 8(1)            | -1(1)           | 8(1)            |
| C(28) | 28(2)           | 16(2)           | 26(2)           | 7(1)            | -2(1)           | 10(1)           |
| C(29) | 26(2)           | 12(1)           | 21(2)           | 4(1)            | -2(1)           | 6(1)            |
| C(30) | 24(2)           | 13(1)           | 20(2)           | 5(1)            | 2(1)            | 5(1)            |
| C(31) | 33(2)           | 20(2)           | 30(2)           | 10(2)           | -6(2)           | 9(2)            |
| C(32) | 44(2)           | 19(2)           | 26(2)           | 7(1)            | -8(2)           | 11(2)           |
| C(33) | 42(2)           | 19(2)           | 24(2)           | 10(1)           | 4(2)            | 8(2)            |
| C(34) | 32(2)           | 15(2)           | 23(2)           | 9(1)            | 1(1)            | 5(1)            |
| C(35) | 25(2)           | 18(2)           | 19(2)           | 10(1)           | 3(1)            | 5(1)            |
| C(36) | 25(2)           | 20(2)           | 23(2)           | 7(1)            | 2(1)            | 6(1)            |
| C(37) | 27(2)           | 30(2)           | 33(2)           | 14(2)           | 5(2)            | 13(2)           |
| C(38) | 21(2)           | 32(2)           | 30(2)           | 13(2)           | 1(1)            | 7(2)            |
| C(39) | 28(2)           | 21(2)           | 18(2)           | 7(1)            | 3(1)            | 5(1)            |
| C(40) | 24(2)           | 21(2)           | 18(2)           | 9(1)            | 4(1)            | 6(1)            |
| C(41) | 25(2)           | 28(2)           | 24(2)           | 11(2)           | 2(1)            | 1(2)            |
| C(42) | 33(2)           | 16(2)           | 29(2)           | 5(1)            | 1(2)            | 2(1)            |
| C(43) | 31(2)           | 18(2)           | 28(2)           | 7(1)            | 1(1)            | 7(1)            |
| C(44) | 27(2)           | 23(2)           | 23(2)           | 11(1)           | 2(1)            | 7(1)            |
| C(45) | 24(2)           | 20(2)           | 25(2)           | 11(1)           | 1(1)            | 6(1)            |
| C(46) | 28(2)           | 21(2)           | 25(2)           | 11(1)           | 3(1)            | 4(1)            |
| C(47) | 31(2)           | 22(2)           | 26(2)           | 15(1)           | 6(1)            | 10(1)           |
| C(48) | 30(2)           | 17(2)           | 22(2)           | 8(1)            | 2(1)            | 10(1)           |

|       |         |         |        |        |       |         |
|-------|---------|---------|--------|--------|-------|---------|
| C(49) | 28(2)   | 14(2)   | 21(2)  | 6(1)   | 4(1)  | 8(1)    |
| C(50) | 27(2)   | 15(2)   | 20(2)  | 6(1)   | 2(1)  | 8(1)    |
| C(51) | 28(2)   | 19(2)   | 24(2)  | 9(1)   | 2(1)  | 10(1)   |
| C(52) | 27(2)   | 25(2)   | 26(2)  | 12(1)  | 0(1)  | 9(1)    |
| C(53) | 32(2)   | 25(2)   | 25(2)  | 13(1)  | 1(1)  | 12(2)   |
| C(54) | 22(2)   | 23(2)   | 29(2)  | 10(1)  | 0(1)  | 7(1)    |
| C(55) | 24(2)   | 17(2)   | 27(2)  | 9(1)   | 2(1)  | 7(1)    |
| C(56) | 25(2)   | 17(2)   | 20(2)  | 7(1)   | 2(1)  | 5(1)    |
| C(57) | 25(2)   | 26(2)   | 32(2)  | 17(2)  | 4(1)  | 10(1)   |
| C(58) | 26(2)   | 38(2)   | 35(2)  | 19(2)  | 6(2)  | 16(2)   |
| C(59) | 33(2)   | 56(3)   | 37(2)  | 27(2)  | 11(2) | 23(2)   |
| C(60) | 24(2)   | 53(2)   | 53(2)  | 38(2)  | 12(2) | 15(2)   |
| C(61) | 19(2)   | 38(2)   | 50(2)  | 23(2)  | 1(2)  | 4(2)    |
| C(62) | 28(2)   | 34(2)   | 36(2)  | 18(2)  | 4(2)  | 10(2)   |
| C(63) | 17(2)   | 25(2)   | 24(2)  | 14(1)  | 4(1)  | 4(1)    |
| C(64) | 22(2)   | 29(2)   | 25(2)  | 10(2)  | 4(1)  | 6(1)    |
| C(65) | 22(2)   | 44(2)   | 20(2)  | 13(2)  | 3(1)  | 11(2)   |
| C(66) | 23(2)   | 47(2)   | 27(2)  | 22(2)  | 9(1)  | 15(2)   |
| C(67) | 17(2)   | 32(2)   | 30(2)  | 20(2)  | 4(1)  | 7(1)    |
| C(68) | 15(2)   | 24(2)   | 26(2)  | 15(1)  | 4(1)  | 2(1)    |
| C(69) | 34(2)   | 72(3)   | 27(2)  | 30(2)  | 14(2) | 29(2)   |
| C(70) | 41(2)   | 71(3)   | 52(3)  | 49(2)  | 26(2) | 37(2)   |
| C(71) | 29(2)   | 47(2)   | 56(3)  | 37(2)  | 15(2) | 19(2)   |
| C(72) | 23(2)   | 33(2)   | 44(2)  | 26(2)  | 7(2)  | 9(2)    |
| C(73) | 22(2)   | 19(2)   | 26(2)  | 12(1)  | 1(1)  | 5(1)    |
| C(74) | 20(2)   | 22(2)   | 31(2)  | 14(1)  | 3(1)  | 4(1)    |
| C(75) | 31(2)   | 28(2)   | 27(2)  | 13(2)  | 9(2)  | 6(2)    |
| C(76) | 38(2)   | 33(2)   | 23(2)  | 6(2)   | 3(2)  | 5(2)    |
| C(77) | 32(2)   | 28(2)   | 29(2)  | 11(2)  | 1(2)  | 1(2)    |
| C(78) | 27(2)   | 23(2)   | 26(2)  | 14(1)  | 1(1)  | 6(1)    |
| C(79) | 28(2)   | 24(2)   | 27(2)  | 13(2)  | 1(1)  | 3(1)    |
| C(80) | 30(2)   | 36(2)   | 33(2)  | 16(2)  | 3(2)  | -1(2)   |
| C(81) | 35(2)   | 38(2)   | 39(2)  | 15(2)  | -3(2) | -16(2)  |
| C(82) | 42(2)   | 37(2)   | 27(2)  | 6(2)   | 1(2)  | -7(2)   |
| C(83) | 29(2)   | 38(2)   | 31(2)  | 20(2)  | 3(2)  | 4(2)    |
| C(84) | 34(2)   | 93(4)   | 66(3)  | 60(3)  | 8(2)  | 12(2)   |
| C(85) | 30(2)   | 126(5)  | 75(3)  | 66(4)  | 7(2)  | 16(3)   |
| C(86) | 32(2)   | 91(4)   | 57(3)  | 48(3)  | 7(2)  | 2(2)    |
| C(87) | 44(2)   | 28(2)   | 26(2)  | 11(2)  | 7(2)  | 2(2)    |
| C(88) | 37(2)   | 23(2)   | 29(2)  | 11(2)  | 6(2)  | 5(2)    |
| C(89) | 49(3)   | 33(2)   | 36(2)  | 6(2)   | -2(2) | 16(2)   |
| C(90) | 79(4)   | 146(6)  | 87(4)  | 4(4)   | 6(3)  | 79(4)   |
| C(91) | 43(2)   | 42(2)   | 35(2)  | 16(2)  | 6(2)  | 19(2)   |
| C(92) | 56(5)   | 560(30) | 22(3)  | 40(8)  | 9(3)  | 122(10) |
| C(93) | 273(17) | 252(14) | 102(8) | -15(9) | 43(8) | 62(12)  |
| C(94) | 51(3)   | 62(3)   | 61(3)  | 36(3)  | -3(2) | 10(2)   |
| F(1)  | 65(2)   | 31(1)   | 58(2)  | 25(1)  | 14(1) | 19(1)   |
| F(2)  | 63(2)   | 74(2)   | 62(2)  | 29(1)  | 2(1)  | 44(2)   |
| F(3)  | 70(2)   | 52(2)   | 44(1)  | 16(1)  | 24(1) | 40(1)   |
| F(4)  | 99(3)   | 113(3)  | 152(4) | -11(3) | 70(3) | -39(2)  |
| F(5)  | 83(3)   | 229(5)  | 307(6) | 200(5) | 46(3) | 93(3)   |
| F(6)  | 117(3)  | 311(6)  | 53(2)  | 55(3)  | 27(2) | 143(4)  |
| Fe(1) | 24(1)   | 16(1)   | 19(1)  | 9(1)   | 1(1)  | 6(1)    |
| N(1)  | 18(1)   | 18(1)   | 21(1)  | 10(1)  | 2(1)  | 5(1)    |
| N(2)  | 20(1)   | 15(1)   | 23(1)  | 10(1)  | 3(1)  | 4(1)    |
| N(3)  | 24(1)   | 18(1)   | 24(1)  | 11(1)  | 5(1)  | 6(1)    |
| N(4)  | 22(1)   | 15(1)   | 20(1)  | 8(1)   | 2(1)  | 4(1)    |

|      |         |         |         |         |         |         |
|------|---------|---------|---------|---------|---------|---------|
| N(5) | 23(2)   | 21(1)   | 28(2)   | 12(1)   | 5(1)    | 9(1)    |
| N(6) | 333(18) | 520(20) | 500(30) | 340(20) | 266(18) | 348(19) |
| O(1) | 32(1)   | 22(1)   | 23(1)   | 9(1)    | 8(1)    | 8(1)    |
| O(2) | 39(2)   | 41(2)   | 30(1)   | 17(1)   | -2(1)   | 15(1)   |
| O(3) | 34(1)   | 33(1)   | 46(2)   | 21(1)   | 11(1)   | 4(1)    |
| O(4) | 61(3)   | 424(10) | 101(4)  | 152(5)  | 25(3)   | 43(4)   |
| O(5) | 128(4)  | 93(3)   | 169(4)  | 90(3)   | 76(3)   | 79(3)   |
| O(6) | 47(2)   | 33(2)   | 385(9)  | -15(3)  | 27(4)   | 12(2)   |
| O(7) | 92(4)   | 104(5)  | 129(5)  | 67(4)   | 32(4)   | 61(4)   |
| O(8) | 55(6)   | 141(10) | 134(9)  | 65(7)   | 35(5)   | 48(6)   |
| S(1) | 31(1)   | 26(1)   | 28(1)   | 13(1)   | 5(1)    | 10(1)   |
| S(2) | 47(1)   | 40(1)   | 57(1)   | 25(1)   | 4(1)    | 5(1)    |

---



Table 5. Hydrogen coordinates [ $\times 10^4$ ] and isotropic displacement parameters [ $\text{\AA}^2 \times 10^3$ ] for Nish02.

|       | x     | y     | z     | U(eq) |
|-------|-------|-------|-------|-------|
| H(1)  | 5921  | -1981 | 7444  | 25    |
| H(3)  | 7381  | -1557 | 9275  | 28    |
| H(6)  | 8070  | 41    | 10136 | 32    |
| H(7)  | 8300  | 1545  | 10412 | 30    |
| H(10) | 7999  | 2780  | 10091 | 27    |
| H(14) | 5405  | 3088  | 9115  | 32    |
| H(15) | 5338  | 4537  | 9540  | 40    |
| H(16) | 7010  | 5836  | 10095 | 45    |
| H(17) | 8763  | 5690  | 10238 | 43    |
| H(18) | 8833  | 4239  | 9829  | 34    |
| H(20) | 6465  | -3015 | 9046  | 28    |
| H(21) | 5921  | -4604 | 8699  | 34    |
| H(22) | 5494  | -5497 | 7570  | 39    |
| H(23) | 5634  | -4783 | 6773  | 40    |
| H(24) | 6174  | -3201 | 7107  | 32    |
| H(26) | 4489  | 1383  | 8100  | 27    |
| H(27) | 3596  | 1772  | 7362  | 30    |
| H(31) | 3734  | 2462  | 6479  | 34    |
| H(32) | 4849  | 3273  | 5850  | 37    |
| H(33) | 6875  | 3872  | 6076  | 35    |
| H(34) | 7792  | 3682  | 6925  | 29    |
| H(36) | 8390  | 2054  | 7736  | 29    |
| H(37) | 10394 | 2718  | 8071  | 35    |
| H(38) | 11377 | 4310  | 8478  | 34    |
| H(41) | 11347 | 5860  | 8804  | 33    |
| H(42) | 10325 | 6786  | 8950  | 35    |
| H(43) | 8309  | 6125  | 8659  | 32    |
| H(44) | 7311  | 4547  | 8219  | 30    |
| H(45) | 7853  | 1129  | 6570  | 28    |
| H(47) | 5811  | 1359  | 5234  | 30    |
| H(52) | 2121  | 4     | 5699  | 31    |
| H(53) | 3669  | 753   | 5257  | 31    |
| H(54) | 1339  | -808  | 6498  | 30    |
| H(58) | 1947  | -628  | 8427  | 37    |
| H(59) | 306   | -1260 | 8891  | 45    |
| H(60) | -1328 | -2500 | 8216  | 46    |
| H(61) | -1361 | -3068 | 7062  | 43    |
| H(62) | 255   | -2411 | 6585  | 38    |
| H(64) | 4244  | -122  | 8642  | 32    |
| H(65) | 4486  | -760  | 9422  | 35    |
| H(69) | 4477  | -2104 | 9695  | 46    |
| H(70) | 4038  | -3664 | 9366  | 52    |
| H(71) | 3354  | -4605 | 8248  | 45    |
| H(72) | 3076  | -3995 | 7463  | 37    |
| H(74) | 4303  | -2201 | 6558  | 29    |
| H(75) | 3753  | -3178 | 5438  | 35    |
| H(76) | 2025  | -4469 | 5116  | 42    |
| H(79) | 1175  | -3425 | 7611  | 33    |
| H(80) | -555  | -4713 | 7265  | 44    |

|        |       |       |      |     |
|--------|-------|-------|------|-----|
| H(81)  | -1019 | -5737 | 6150 | 56  |
| H(82)  | 210   | -5440 | 5388 | 53  |
| H(84)  | 9017  | 1124  | 5833 | 72  |
| H(85)  | 10596 | 1697  | 5302 | 89  |
| H(86)  | 10567 | 2646  | 4697 | 74  |
| H(87)  | 8944  | 2948  | 4585 | 44  |
| H(88)  | 7372  | 2377  | 5104 | 37  |
| H(90A) | 9984  | -386  | 7460 | 155 |
| H(90B) | 10717 | 705   | 7709 | 155 |
| H(90C) | 10280 | 131   | 6929 | 155 |
| H(93A) | 1085  | 3675  | 6674 | 362 |
| H(93B) | 2330  | 3773  | 6461 | 362 |
| H(93C) | 2186  | 4070  | 7235 | 362 |

---

Table 6. Torsion angles [°] for Nish02.

|                         |           |                         |           |
|-------------------------|-----------|-------------------------|-----------|
| N(1)-C(1)-C(2)-C(3)     | -0.7(5)   | C(31)-C(28)-C(29)-C(30) | -179.9(3) |
| N(1)-C(1)-C(2)-C(19)    | 176.8(3)  | C(26)-C(25)-C(30)-C(29) | -6.7(4)   |
| C(1)-C(2)-C(3)-C(4)     | 1.0(4)    | C(12)-C(25)-C(30)-C(29) | 176.4(3)  |
| C(19)-C(2)-C(3)-C(4)    | -176.4(3) | C(26)-C(25)-C(30)-C(35) | 174.7(3)  |
| C(2)-C(3)-C(4)-C(5)     | 0.1(5)    | C(12)-C(25)-C(30)-C(35) | -2.1(4)   |
| C(2)-C(3)-C(4)-C(6)     | 177.9(3)  | C(28)-C(29)-C(30)-C(25) | 7.5(4)    |
| C(3)-C(4)-C(5)-N(1)     | -1.7(4)   | C(34)-C(29)-C(30)-C(25) | -171.4(3) |
| C(6)-C(4)-C(5)-N(1)     | -179.6(3) | C(28)-C(29)-C(30)-C(35) | -173.9(3) |
| C(3)-C(4)-C(5)-C(9)     | 177.3(3)  | C(34)-C(29)-C(30)-C(35) | 7.2(4)    |
| C(6)-C(4)-C(5)-C(9)     | -0.6(5)   | C(27)-C(28)-C(31)-C(32) | -175.7(3) |
| C(3)-C(4)-C(6)-C(7)     | -178.5(3) | C(29)-C(28)-C(31)-C(32) | 1.6(5)    |
| C(5)-C(4)-C(6)-C(7)     | -0.7(5)   | C(28)-C(31)-C(32)-C(33) | -0.9(5)   |
| C(4)-C(6)-C(7)-C(8)     | 1.0(5)    | C(31)-C(32)-C(33)-C(34) | -0.4(4)   |
| C(6)-C(7)-C(8)-C(10)    | 176.5(3)  | C(32)-C(33)-C(34)-C(29) | 1.0(5)    |
| C(6)-C(7)-C(8)-C(9)     | -0.1(5)   | C(28)-C(29)-C(34)-C(33) | -0.3(4)   |
| C(10)-C(8)-C(9)-N(2)    | 0.7(4)    | C(30)-C(29)-C(34)-C(33) | 178.6(3)  |
| C(7)-C(8)-C(9)-N(2)     | 177.5(3)  | C(25)-C(30)-C(35)-C(36) | 57.9(4)   |
| C(10)-C(8)-C(9)-C(5)    | -178.0(3) | C(29)-C(30)-C(35)-C(36) | -120.7(3) |
| C(7)-C(8)-C(9)-C(5)     | -1.2(4)   | C(25)-C(30)-C(35)-C(40) | -119.9(3) |
| N(1)-C(5)-C(9)-N(2)     | 1.8(4)    | C(29)-C(30)-C(35)-C(40) | 61.6(4)   |
| C(4)-C(5)-C(9)-N(2)     | -177.2(3) | C(40)-C(35)-C(36)-C(37) | -1.0(5)   |
| N(1)-C(5)-C(9)-C(8)     | -179.5(3) | C(30)-C(35)-C(36)-C(37) | -178.8(3) |
| C(4)-C(5)-C(9)-C(8)     | 1.5(4)    | C(35)-C(36)-C(37)-C(38) | -0.5(5)   |
| C(9)-C(8)-C(10)-C(11)   | 2.5(5)    | C(36)-C(37)-C(38)-C(39) | 1.2(5)    |
| C(7)-C(8)-C(10)-C(11)   | -174.2(3) | C(37)-C(38)-C(39)-C(40) | -0.4(5)   |
| C(8)-C(10)-C(11)-C(12)  | -3.9(4)   | C(37)-C(38)-C(39)-C(41) | 178.7(3)  |
| C(8)-C(10)-C(11)-C(13)  | 173.3(3)  | C(38)-C(39)-C(40)-C(44) | 176.7(3)  |
| C(10)-C(11)-C(12)-N(2)  | 2.4(4)    | C(41)-C(39)-C(40)-C(44) | -2.4(4)   |
| C(13)-C(11)-C(12)-N(2)  | -174.7(3) | C(38)-C(39)-C(40)-C(35) | -1.1(4)   |
| C(10)-C(11)-C(12)-C(25) | -178.7(3) | C(41)-C(39)-C(40)-C(35) | 179.8(3)  |
| C(13)-C(11)-C(12)-C(25) | 4.2(4)    | C(36)-C(35)-C(40)-C(44) | -175.9(3) |
| C(10)-C(11)-C(13)-C(14) | -125.6(3) | C(30)-C(35)-C(40)-C(44) | 1.9(4)    |
| C(12)-C(11)-C(13)-C(14) | 51.5(4)   | C(36)-C(35)-C(40)-C(39) | 1.8(4)    |
| C(10)-C(11)-C(13)-C(18) | 49.1(4)   | C(30)-C(35)-C(40)-C(39) | 179.6(3)  |
| C(12)-C(11)-C(13)-C(18) | -133.8(3) | C(38)-C(39)-C(41)-C(42) | -177.5(3) |
| C(18)-C(13)-C(14)-C(15) | 0.1(5)    | C(40)-C(39)-C(41)-C(42) | 1.6(5)    |
| C(11)-C(13)-C(14)-C(15) | 174.9(3)  | C(39)-C(41)-C(42)-C(43) | -0.1(5)   |
| C(13)-C(14)-C(15)-C(16) | 0.3(5)    | C(41)-C(42)-C(43)-C(44) | -0.4(5)   |
| C(14)-C(15)-C(16)-C(17) | -0.3(5)   | C(42)-C(43)-C(44)-C(40) | -0.5(5)   |
| C(15)-C(16)-C(17)-C(18) | -0.2(5)   | C(39)-C(40)-C(44)-C(43) | 2.0(4)    |
| C(16)-C(17)-C(18)-C(13) | 0.6(5)    | C(35)-C(40)-C(44)-C(43) | 179.6(3)  |
| C(14)-C(13)-C(18)-C(17) | -0.6(5)   | N(3)-C(45)-C(46)-C(47)  | 2.1(5)    |
| C(11)-C(13)-C(18)-C(17) | -175.4(3) | N(3)-C(45)-C(46)-C(83)  | -174.8(3) |
| C(3)-C(2)-C(19)-C(20)   | 19.4(5)   | C(45)-C(46)-C(47)-C(48) | -1.2(5)   |
| C(1)-C(2)-C(19)-C(20)   | -158.0(3) | C(83)-C(46)-C(47)-C(48) | 175.6(3)  |
| C(3)-C(2)-C(19)-C(24)   | -161.9(3) | C(46)-C(47)-C(48)-C(49) | -0.9(5)   |
| C(1)-C(2)-C(19)-C(24)   | 20.7(4)   | C(46)-C(47)-C(48)-C(53) | 179.4(3)  |
| C(24)-C(19)-C(20)-C(21) | -2.5(5)   | C(47)-C(48)-C(49)-N(3)  | 2.5(4)    |
| C(2)-C(19)-C(20)-C(21)  | 176.2(3)  | C(53)-C(48)-C(49)-N(3)  | -177.8(3) |
| C(19)-C(20)-C(21)-C(22) | 1.0(5)    | C(47)-C(48)-C(49)-C(50) | -176.5(3) |
| C(20)-C(21)-C(22)-C(23) | 0.6(5)    | C(53)-C(48)-C(49)-C(50) | 3.2(4)    |
| C(21)-C(22)-C(23)-C(24) | -0.6(5)   | N(3)-C(49)-C(50)-N(4)   | -2.2(4)   |
| C(22)-C(23)-C(24)-C(19) | -0.9(5)   | C(48)-C(49)-C(50)-N(4)  | 176.9(3)  |
| C(20)-C(19)-C(24)-C(23) | 2.5(5)    | N(3)-C(49)-C(50)-C(51)  | 177.7(3)  |
| C(2)-C(19)-C(24)-C(23)  | -176.2(3) | C(48)-C(49)-C(50)-C(51) | -3.3(4)   |
| N(2)-C(12)-C(25)-C(30)  | -110.1(3) | N(4)-C(50)-C(51)-C(54)  | 2.9(5)    |
| C(11)-C(12)-C(25)-C(30) | 70.9(4)   | C(49)-C(50)-C(51)-C(54) | -176.9(3) |
| N(2)-C(12)-C(25)-C(26)  | 72.9(4)   | N(4)-C(50)-C(51)-C(52)  | -179.2(3) |
| C(11)-C(12)-C(25)-C(26) | -106.1(3) | C(49)-C(50)-C(51)-C(52) | 1.0(4)    |
| C(30)-C(25)-C(26)-C(27) | 0.8(5)    | C(50)-C(51)-C(52)-C(53) | 1.5(5)    |
| C(12)-C(25)-C(26)-C(27) | 177.8(3)  | C(54)-C(51)-C(52)-C(53) | 179.3(3)  |
| C(25)-C(26)-C(27)-C(28) | 4.4(5)    | C(51)-C(52)-C(53)-C(48) | -1.6(5)   |
| C(26)-C(27)-C(28)-C(31) | 173.9(3)  | C(47)-C(48)-C(53)-C(52) | 178.9(3)  |
| C(26)-C(27)-C(28)-C(29) | -3.4(5)   | C(49)-C(48)-C(53)-C(52) | -0.8(5)   |
| C(27)-C(28)-C(29)-C(34) | 176.4(3)  | C(50)-C(51)-C(54)-C(55) | -1.4(5)   |
| C(31)-C(28)-C(29)-C(34) | -1.0(4)   | C(52)-C(51)-C(54)-C(55) | -179.3(3) |
| C(27)-C(28)-C(29)-C(30) | -2.6(4)   | C(51)-C(54)-C(55)-C(56) | -2.5(5)   |

|                         |           |                         |             |
|-------------------------|-----------|-------------------------|-------------|
| C(51)-C(54)-C(55)-C(57) | 176.7(3)  | C(45)-C(46)-C(83)-C(88) | -162.1(3)   |
| C(54)-C(55)-C(56)-N(4)  | 5.3(5)    | C(47)-C(46)-C(83)-C(84) | -150.5(4)   |
| C(57)-C(55)-C(56)-N(4)  | -173.8(3) | C(45)-C(46)-C(83)-C(84) | 26.2(5)     |
| C(54)-C(55)-C(56)-C(63) | -173.2(3) | C(88)-C(83)-C(84)-C(85) | 3.2(7)      |
| C(57)-C(55)-C(56)-C(63) | 7.6(5)    | C(46)-C(83)-C(84)-C(85) | 175.2(4)    |
| C(54)-C(55)-C(57)-C(62) | 51.9(4)   | C(83)-C(84)-C(85)-C(86) | -0.6(8)     |
| C(56)-C(55)-C(57)-C(62) | -128.9(3) | C(84)-C(85)-C(86)-C(87) | -1.9(8)     |
| C(54)-C(55)-C(57)-C(58) | -122.9(3) | C(85)-C(86)-C(87)-C(88) | 1.7(7)      |
| C(56)-C(55)-C(57)-C(58) | 56.2(4)   | C(86)-C(87)-C(88)-C(83) | 1.0(6)      |
| C(62)-C(57)-C(58)-C(59) | 0.9(5)    | C(84)-C(83)-C(88)-C(87) | -3.5(5)     |
| C(55)-C(57)-C(58)-C(59) | 175.8(3)  | C(46)-C(83)-C(88)-C(87) | -175.4(3)   |
| C(57)-C(58)-C(59)-C(60) | 0.9(5)    | C(2)-C(1)-N(1)-C(5)     | -0.8(4)     |
| C(58)-C(59)-C(60)-C(61) | -1.7(5)   | C(2)-C(1)-N(1)-Fe(1)    | 168.5(2)    |
| C(59)-C(60)-C(61)-C(62) | 0.6(5)    | C(4)-C(5)-N(1)-C(1)     | 2.0(4)      |
| C(60)-C(61)-C(62)-C(57) | 1.3(5)    | C(9)-C(5)-N(1)-C(1)     | -177.0(3)   |
| C(58)-C(57)-C(62)-C(61) | -2.0(5)   | C(4)-C(5)-N(1)-Fe(1)    | -168.8(2)   |
| C(55)-C(57)-C(62)-C(61) | -176.9(3) | C(9)-C(5)-N(1)-Fe(1)    | 12.3(3)     |
| N(4)-C(56)-C(63)-C(68)  | -104.1(3) | N(3)-Fe(1)-N(1)-C(1)    | -45.8(8)    |
| C(55)-C(56)-C(63)-C(68) | 74.5(4)   | O(1)-Fe(1)-N(1)-C(1)    | -15.2(2)    |
| N(4)-C(56)-C(63)-C(64)  | 79.1(4)   | N(5)-Fe(1)-N(1)-C(1)    | -97.6(3)    |
| C(55)-C(56)-C(63)-C(64) | -102.3(3) | N(2)-Fe(1)-N(1)-C(1)    | 175.6(3)    |
| C(68)-C(63)-C(64)-C(65) | 0.9(5)    | N(4)-Fe(1)-N(1)-C(1)    | 77.4(3)     |
| C(56)-C(63)-C(64)-C(65) | 177.6(3)  | N(3)-Fe(1)-N(1)-C(5)    | 124.0(7)    |
| C(63)-C(64)-C(65)-C(66) | 1.3(5)    | O(1)-Fe(1)-N(1)-C(5)    | 154.6(2)    |
| C(64)-C(65)-C(66)-C(67) | -1.5(5)   | N(5)-Fe(1)-N(1)-C(5)    | 72.2(2)     |
| C(64)-C(65)-C(66)-C(69) | 177.0(3)  | N(2)-Fe(1)-N(1)-C(5)    | -14.6(2)    |
| C(65)-C(66)-C(67)-C(72) | 177.1(3)  | N(4)-Fe(1)-N(1)-C(5)    | -112.8(2)   |
| C(69)-C(66)-C(67)-C(72) | -1.5(5)   | C(11)-C(12)-N(2)-C(9)   | 0.6(4)      |
| C(65)-C(66)-C(67)-C(68) | -0.4(5)   | C(25)-C(12)-N(2)-C(9)   | -178.4(3)   |
| C(69)-C(66)-C(67)-C(68) | -178.9(3) | C(11)-C(12)-N(2)-Fe(1)  | -166.4(2)   |
| C(64)-C(63)-C(68)-C(67) | -2.8(5)   | C(25)-C(12)-N(2)-Fe(1)  | 14.6(4)     |
| C(56)-C(63)-C(68)-C(67) | -179.5(3) | C(8)-C(9)-N(2)-C(12)    | -2.2(4)     |
| C(64)-C(63)-C(68)-C(73) | -178.7(3) | C(5)-C(9)-N(2)-C(12)    | 176.5(3)    |
| C(56)-C(63)-C(68)-C(73) | 4.6(4)    | C(8)-C(9)-N(2)-Fe(1)    | 167.4(2)    |
| C(72)-C(67)-C(68)-C(63) | -174.8(3) | C(5)-C(9)-N(2)-Fe(1)    | -13.9(3)    |
| C(66)-C(67)-C(68)-C(63) | 2.5(4)    | N(3)-Fe(1)-N(2)-C(12)   | 8.6(3)      |
| C(72)-C(67)-C(68)-C(73) | 1.2(4)    | N(1)-Fe(1)-N(2)-C(12)   | -177.1(3)   |
| C(66)-C(67)-C(68)-C(73) | 178.5(3)  | O(1)-Fe(1)-N(2)-C(12)   | 150.5(3)    |
| C(65)-C(66)-C(69)-C(70) | -179.8(3) | N(5)-Fe(1)-N(2)-C(12)   | 99.2(3)     |
| C(67)-C(66)-C(69)-C(70) | -1.2(5)   | N(4)-Fe(1)-N(2)-C(12)   | -71.8(3)    |
| C(66)-C(69)-C(70)-C(71) | 2.4(5)    | N(3)-Fe(1)-N(2)-C(9)    | -159.34(19) |
| C(69)-C(70)-C(71)-C(72) | -0.7(5)   | N(1)-Fe(1)-N(2)-C(9)    | 15.01(19)   |
| C(70)-C(71)-C(72)-C(67) | -2.1(5)   | O(1)-Fe(1)-N(2)-C(9)    | -17.4(4)    |
| C(66)-C(67)-C(72)-C(71) | 3.2(5)    | N(5)-Fe(1)-N(2)-C(9)    | -68.7(2)    |
| C(68)-C(67)-C(72)-C(71) | -179.5(3) | N(4)-Fe(1)-N(2)-C(9)    | 120.26(19)  |
| C(63)-C(68)-C(73)-C(74) | 60.7(4)   | C(46)-C(45)-N(3)-C(49)  | -0.5(5)     |
| C(67)-C(68)-C(73)-C(74) | -115.2(3) | C(46)-C(45)-N(3)-Fe(1)  | 173.8(2)    |
| C(63)-C(68)-C(73)-C(78) | -122.2(3) | C(48)-C(49)-N(3)-C(45)  | -1.8(4)     |
| C(67)-C(68)-C(73)-C(78) | 61.9(4)   | C(50)-C(49)-N(3)-C(45)  | 177.2(3)    |
| C(78)-C(73)-C(74)-C(75) | -2.2(5)   | C(48)-C(49)-N(3)-Fe(1)  | -176.8(2)   |
| C(68)-C(73)-C(74)-C(75) | 175.0(3)  | C(50)-C(49)-N(3)-Fe(1)  | 2.2(3)      |
| C(73)-C(74)-C(75)-C(76) | -0.6(5)   | N(1)-Fe(1)-N(3)-C(45)   | -50.8(8)    |
| C(74)-C(75)-C(76)-C(77) | 2.0(5)    | O(1)-Fe(1)-N(3)-C(45)   | -81.3(3)    |
| C(75)-C(76)-C(77)-C(82) | -179.7(4) | N(5)-Fe(1)-N(3)-C(45)   | 0.5(3)      |
| C(75)-C(76)-C(77)-C(78) | -0.5(6)   | N(2)-Fe(1)-N(3)-C(45)   | 86.3(3)     |
| C(76)-C(77)-C(78)-C(79) | 178.2(3)  | N(4)-Fe(1)-N(3)-C(45)   | -175.7(3)   |
| C(82)-C(77)-C(78)-C(79) | -2.6(5)   | N(1)-Fe(1)-N(3)-C(49)   | 123.8(7)    |
| C(76)-C(77)-C(78)-C(73) | -2.3(5)   | O(1)-Fe(1)-N(3)-C(49)   | 93.2(2)     |
| C(82)-C(77)-C(78)-C(73) | 176.9(3)  | N(5)-Fe(1)-N(3)-C(49)   | 175.0(2)    |
| C(74)-C(73)-C(78)-C(79) | -176.9(3) | N(2)-Fe(1)-N(3)-C(49)   | -99.2(2)    |
| C(68)-C(73)-C(78)-C(79) | 5.9(5)    | N(4)-Fe(1)-N(3)-C(49)   | -1.2(2)     |
| C(74)-C(73)-C(78)-C(77) | 3.6(5)    | C(55)-C(56)-N(4)-C(50)  | -4.0(4)     |
| C(68)-C(73)-C(78)-C(77) | -173.5(3) | C(63)-C(56)-N(4)-C(50)  | 174.6(3)    |
| C(77)-C(78)-C(79)-C(80) | 2.2(5)    | C(55)-C(56)-N(4)-Fe(1)  | 174.3(2)    |
| C(73)-C(78)-C(79)-C(80) | -177.3(3) | C(63)-C(56)-N(4)-Fe(1)  | -7.2(4)     |
| C(78)-C(79)-C(80)-C(81) | -0.3(5)   | C(51)-C(50)-N(4)-C(56)  | -0.3(4)     |
| C(79)-C(80)-C(81)-C(82) | -1.3(6)   | C(49)-C(50)-N(4)-C(56)  | 179.6(3)    |
| C(80)-C(81)-C(82)-C(77) | 0.9(7)    | C(51)-C(50)-N(4)-Fe(1)  | -178.8(2)   |
| C(76)-C(77)-C(82)-C(81) | -179.7(4) | C(49)-C(50)-N(4)-Fe(1)  | 1.0(3)      |
| C(78)-C(77)-C(82)-C(81) | 1.0(6)    | N(3)-Fe(1)-N(4)-C(56)   | -178.2(3)   |
| C(47)-C(46)-C(83)-C(88) | 21.2(5)   | N(1)-Fe(1)-N(4)-C(56)   | 8.7(3)      |

|                        |             |                       |           |
|------------------------|-------------|-----------------------|-----------|
| O(1)-Fe(1)-N(4)-C(56)  | 95.0(3)     | Fe(1)-O(1)-S(1)-O(3)  | 47.1(3)   |
| N(5)-Fe(1)-N(4)-C(56)  | 162.1(4)    | Fe(1)-O(1)-S(1)-C(91) | 158.8(2)  |
| N(2)-Fe(1)-N(4)-C(56)  | -71.3(3)    | F(1)-C(91)-S(1)-O(2)  | -60.2(3)  |
| N(3)-Fe(1)-N(4)-C(50)  | 0.10(19)    | F(3)-C(91)-S(1)-O(2)  | 61.5(3)   |
| N(1)-Fe(1)-N(4)-C(50)  | -172.97(19) | F(2)-C(91)-S(1)-O(2)  | -178.6(3) |
| O(1)-Fe(1)-N(4)-C(50)  | -86.6(2)    | F(1)-C(91)-S(1)-O(3)  | 178.0(2)  |
| N(5)-Fe(1)-N(4)-C(50)  | -19.6(6)    | F(3)-C(91)-S(1)-O(3)  | -60.4(3)  |
| N(2)-Fe(1)-N(4)-C(50)  | 107.02(19)  | F(2)-C(91)-S(1)-O(3)  | 59.5(3)   |
| C(90)-C(89)-N(5)-Fe(1) | 66(11)      | F(1)-C(91)-S(1)-O(1)  | 57.7(3)   |
| N(3)-Fe(1)-N(5)-C(89)  | -120.9(7)   | F(3)-C(91)-S(1)-O(1)  | 179.4(3)  |
| N(1)-Fe(1)-N(5)-C(89)  | 52.7(7)     | F(2)-C(91)-S(1)-O(1)  | -60.7(3)  |
| O(1)-Fe(1)-N(5)-C(89)  | -33.6(7)    | F(6)-C(94)-S(2)-O(6)  | -57.3(5)  |
| N(2)-Fe(1)-N(5)-C(89)  | 130.4(7)    | F(4)-C(94)-S(2)-O(6)  | -179.6(5) |
| N(4)-Fe(1)-N(5)-C(89)  | -101.7(8)   | F(5)-C(94)-S(2)-O(6)  | 62.9(5)   |
| N(3)-Fe(1)-O(1)-S(1)   | 17.2(2)     | F(6)-C(94)-S(2)-O(5)  | 61.7(5)   |
| N(1)-Fe(1)-O(1)-S(1)   | -158.6(2)   | F(4)-C(94)-S(2)-O(5)  | -60.7(5)  |
| N(5)-Fe(1)-O(1)-S(1)   | -75.2(2)    | F(5)-C(94)-S(2)-O(5)  | -178.2(5) |
| N(2)-Fe(1)-O(1)-S(1)   | -127.0(2)   | F(6)-C(94)-S(2)-O(4)  | -178.2(5) |
| N(4)-Fe(1)-O(1)-S(1)   | 94.4(2)     | F(4)-C(94)-S(2)-O(4)  | 59.5(5)   |
| Fe(1)-O(1)-S(1)-O(2)   | -90.2(2)    | F(5)-C(94)-S(2)-O(4)  | -58.0(6)  |

---

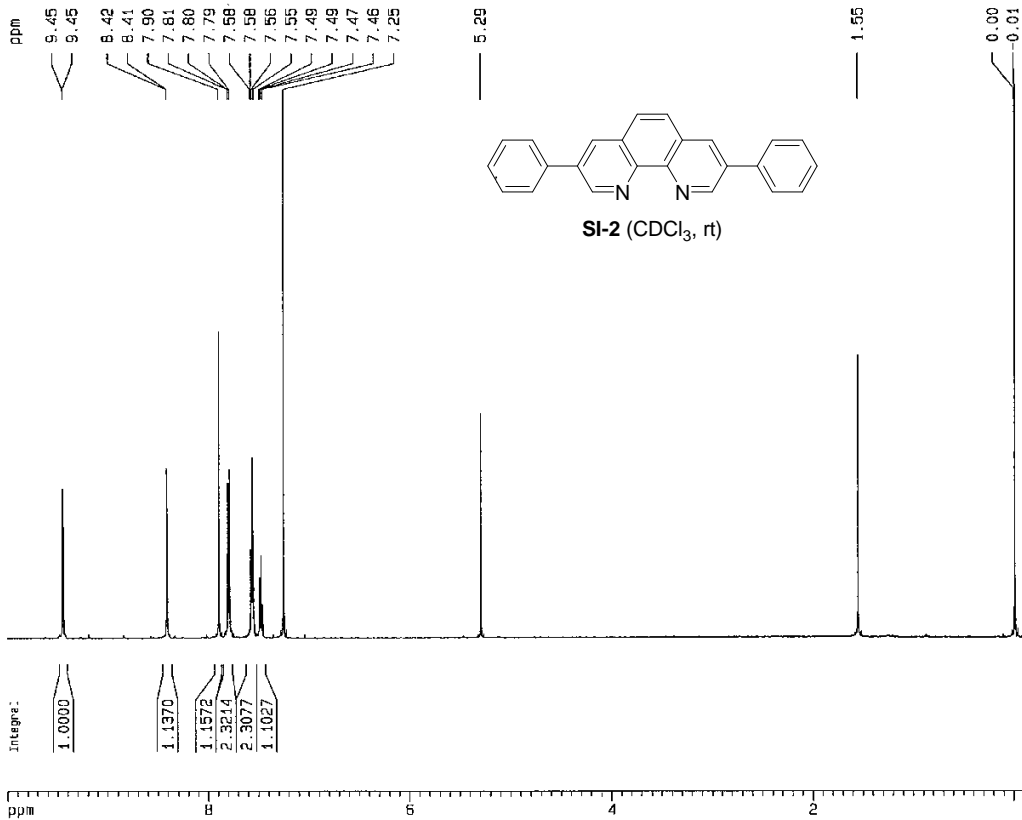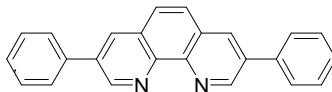

SI-2 (CDCl<sub>3</sub>, rt)

Current Data Parameters

NAME L51-7-A  
EXPNO 1  
PROCNO 2

F2 - Acquisition Parameters

Date\_ 20110212  
Time 15.51  
INSTRUM spect  
PROBHD 5 mm QNP 1H  
PULPROG zg  
TD 48076  
SOLVENT CDCl3  
NS 8  
DS 0  
SWH 6012.620 Hz  
FIDRES 0.165670 Hz  
AQ 2.9999924 sec  
RG 512  
DN 62.400 usec  
DE 4.50 usec  
TE 300.0 K  
D1 3.0000000 sec

===== CHANNEL f1 =====

NUC1 1H  
P1 9.00 usec  
PL1 0.00 dB  
SFO1 500.1325005 MHz

F2 - Processing parameters

SI 65536  
SF 500.1300181 MHz  
WDW EM  
SSB 0  
LB 0.30 Hz  
GB 0  
PC 1.00

1D NMR plot parameters

CX 20.00 cm  
F4P 10.000 ppm  
F1 5001.30 Hz  
F2P -0.100 ppm  
F2 -50.01 Hz  
PPMCK 0.50500 ppm/cm  
HZCM 252.56566 Hz/cm

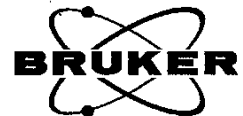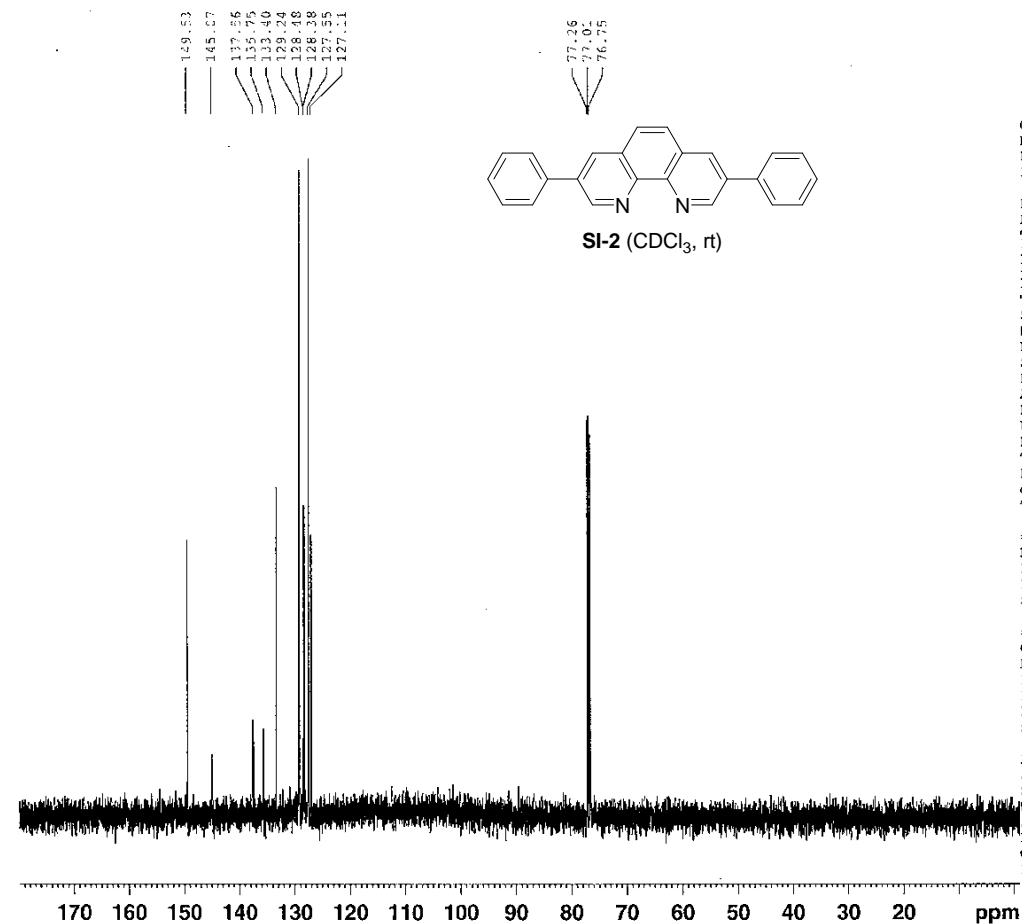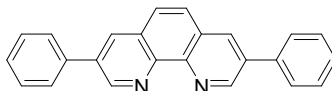

SI-2 (CDCl<sub>3</sub>, rt)

Current Data Parameters

NAME L51-6-A-BCM  
EXPNO 1  
PROCNO 1

F2 - Acquisition Parameters

Date\_ 20110110  
Time 15.43  
INSTRUM spect  
PROBHD 5 mm PABBI 1H/  
PULPROG zg30  
TD 136360  
SOLVENT CDCl3  
NS 160  
DS 0  
SWH 37593.984 Hz  
FIDRES 0.275697 Hz  
AQ 1.8136380 sec  
RG 14596.5  
DW 13.300 usec  
DE 7.50 usec  
TE 295.0 K  
D1 2.0000000 sec  
d11 0.0300000 sec  
TD0 1

===== CHANNEL f1 =====

NUC1 13C  
P1 12.00 usec  
PL1 -3.00 dB  
SFO1 125.7024664 MHz

===== CHANNEL f2 =====

CPDPRG2 waltz16  
NUC2 1H  
PCPD2 90.00 usec  
PL2 0.00 dB  
PL12 28.00 dB  
SFO2 499.8734991 MHz

F2 - Processing parameters

SI 32768  
SF 125.6924181 MHz  
WDW FM  
SSB 0  
LB 1.00 Hz  
GB 0  
PC 1.40

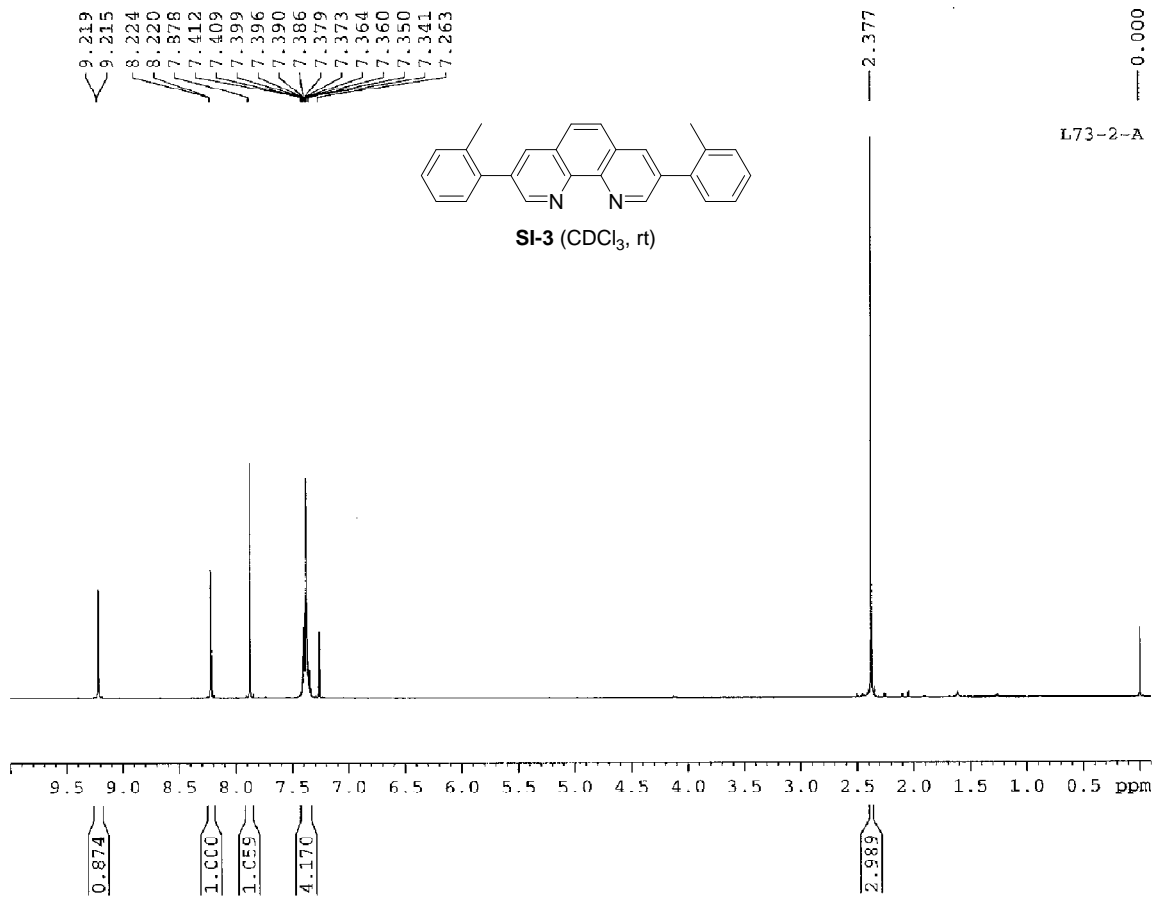

97/10/17, #5, 122.5 mg

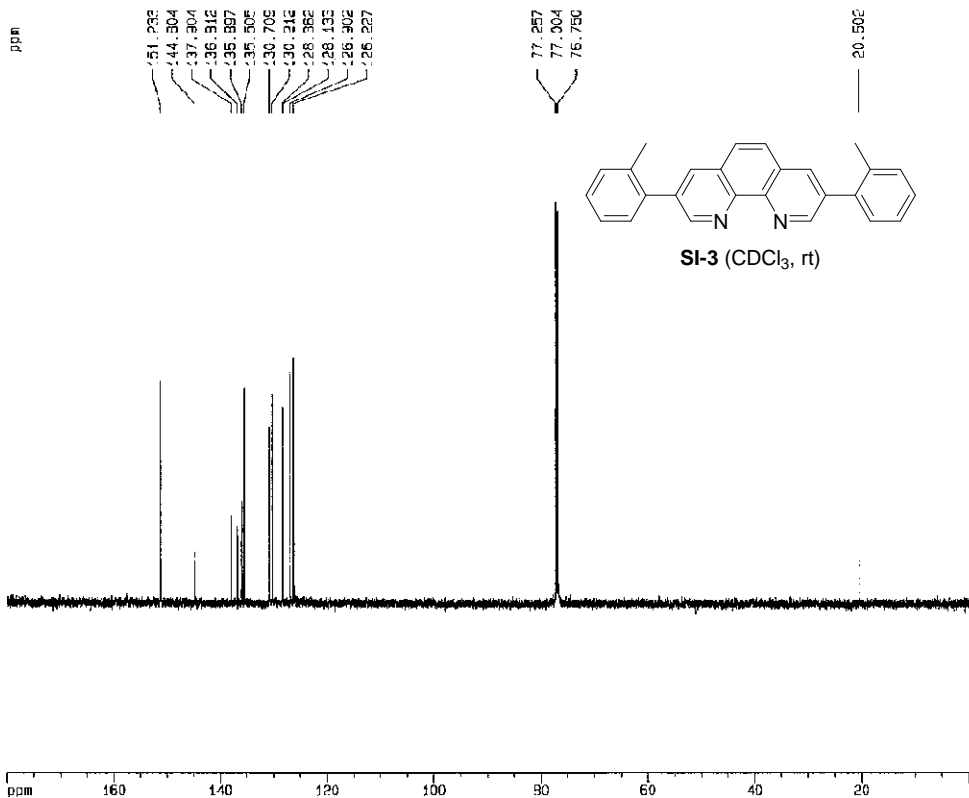

Current Data Parameters  
NAME: L73-2-A-3CM  
EXPNO: 1  
PROCNO: 2

F2 - Acquisition Parameters  
Date\_: 20110201  
Time: 10.44  
INSTRUM: spect  
PROBHD: 5 mm BBO 1H  
PULPROG: zgpg  
TD: 112768  
SOLVENT: CDCl3  
NS: 166  
DS: 6  
SWH: 37593.984 Hz  
FIDRES: 0.333339 Hz  
AQ: 1.5000240 sec  
RG: 8192  
DW: 13.300 usec  
DE: 7.50 usec  
TE: 300.0 K  
D1: 4.0000000 sec  
d11: 0.0200000 sec

CHANNEL F1  
NUC1: 13C  
P1: 6.00 usec  
PL1: 3.00 dB  
SF01: 125.7671708 MHz

CHANNEL F2  
CPDPRG2: waltz16  
NUC2: 1H  
PCPD2: 90.00 usec  
PL2: 120.00 dB  
PL12: 20.00 dB  
SFO2: 500.1300000 MHz

F2 - Processing parameters  
SI: 32768  
SF: 125.7577938 MHz  
WDW: EM  
SSB: 0  
LB: 1.00 Hz  
GB: 0  
PC: 1.40

1D NMR plot parameters  
CX: 20.00 cm  
F1F: 180.000 ppm  
F1: 22636.40 Hz  
F2F: -1.000 ppm  
F2: -125.76 Hz  
PCKCM: 9.05000 ppm/cm  
HCCM: 1135.10731 Hz/cm

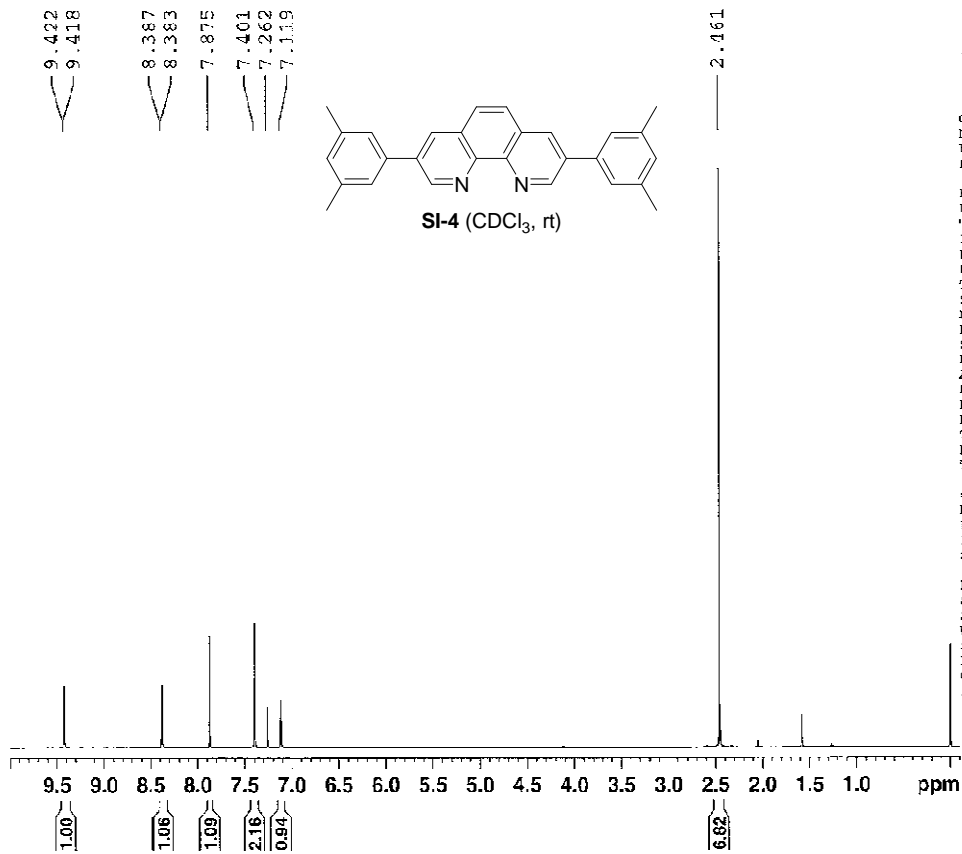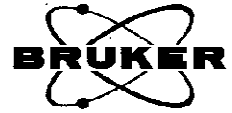

Current Data Parameters  
 NAME L86-6-A2  
 EXPNO 1  
 PROCNO 1

F2 - Acquisition Parameters  
 Date\_ 20100910  
 Time 17.43  
 INSTRUM spect  
 PROBRD 5 mm PARR1 LH/  
 PULPROG zg  
 TD 59996  
 SOLVENT CDCl3  
 NS 6  
 DS 0  
 SAR 10000.000 Hz  
 FIDRES 0.166872 Hz  
 AQ 2.9999499 sec  
 RG 181  
 DW 50.000 usec  
 DE 7.50 usec  
 TE 295.4 K  
 DL 1.0000000 eac  
 TDO 1

===== CHANNEL f1 =====  
 NUC1 1H  
 P1 5.35 usec  
 PL1 0.00 dB  
 SFO1 499.8722322 MHz

F2 - Processing parameters  
 SI 32768  
 SF 499.8700170 MHz  
 WDW EM  
 SSB 0  
 LB 0.30 Hz  
 GB 0  
 PC 1.00

97/10/17, #5, 122.5 mg

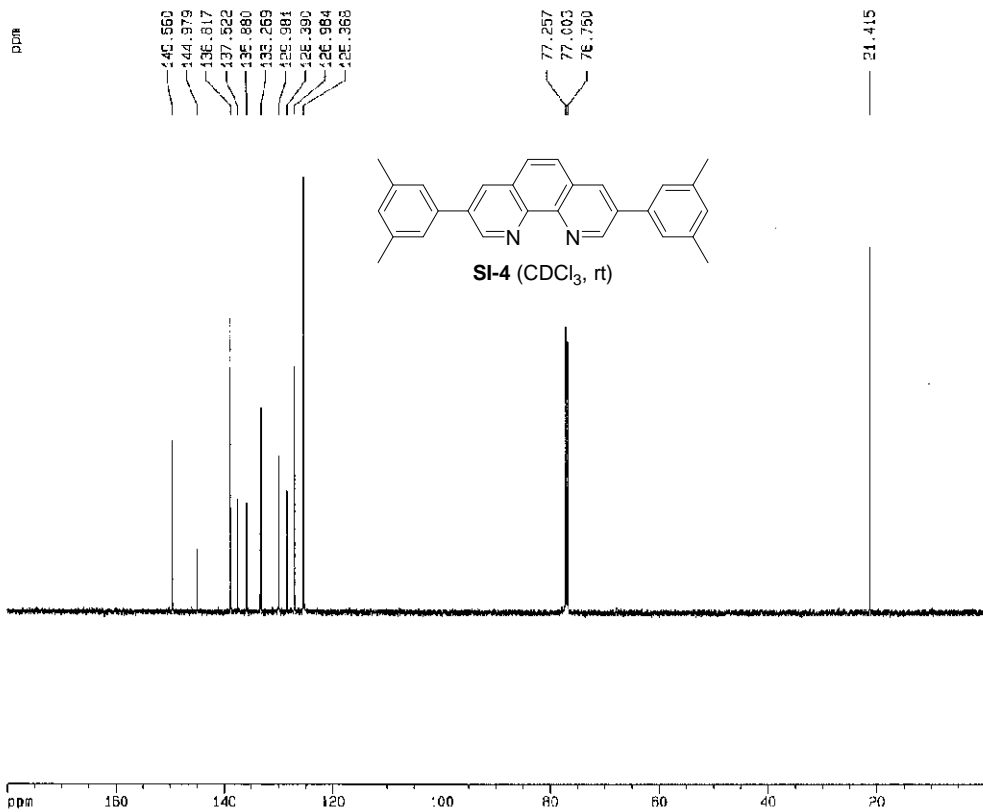

Current Data Parameters  
 NAME L86-TH-BCM  
 EXPNO 1  
 PROCNO 2

F2 - Acquisition Parameters  
 Date\_ 20101230  
 Time 10.02  
 INSTRUM spect  
 PROBRD 5 mm QNP 1H  
 PULPROG zgpg30  
 TD 112760  
 SOLVENT CDCl3  
 NS 200  
 DS 0  
 SAR 37593.084 Hz  
 FIDRES 0.333338 Hz  
 AQ 1.5000240 sec  
 RG 8192  
 DW 13.300 usec  
 DE 7.50 usec  
 TE 300.0 K  
 DL 4.000000000 sec  
 d11 0.03000000 sec

----- CHANNEL f1 -----  
 NUC1 13C  
 P1 8.00 usec  
 PL1 3.00 dB  
 SFO1 125.7613708 MHz

===== CHANNEL f2 =====  
 P2PROG2 wa11215  
 NUC2 1H  
 P2P2 90.00 usec  
 PL2 120.00 dB  
 PL12 20.00 dB  
 SFO2 500.1338000 MHz

F2 - Processing parameters  
 SI 32768  
 SF 125.7577954 MHz  
 WDW EM  
 SSB 0  
 LB 1.00 Hz  
 GB 0  
 PC 1.40

13C NMR plot parameters  
 CX 20.00 cm  
 F1P 180.000 ppm  
 F1 22636.40 Hz  
 F2P -1.000 ppm  
 F2 -125.761 Hz  
 FWHM 9.05000 ppm/cm  
 HZCN 138.16791 Hz/cm



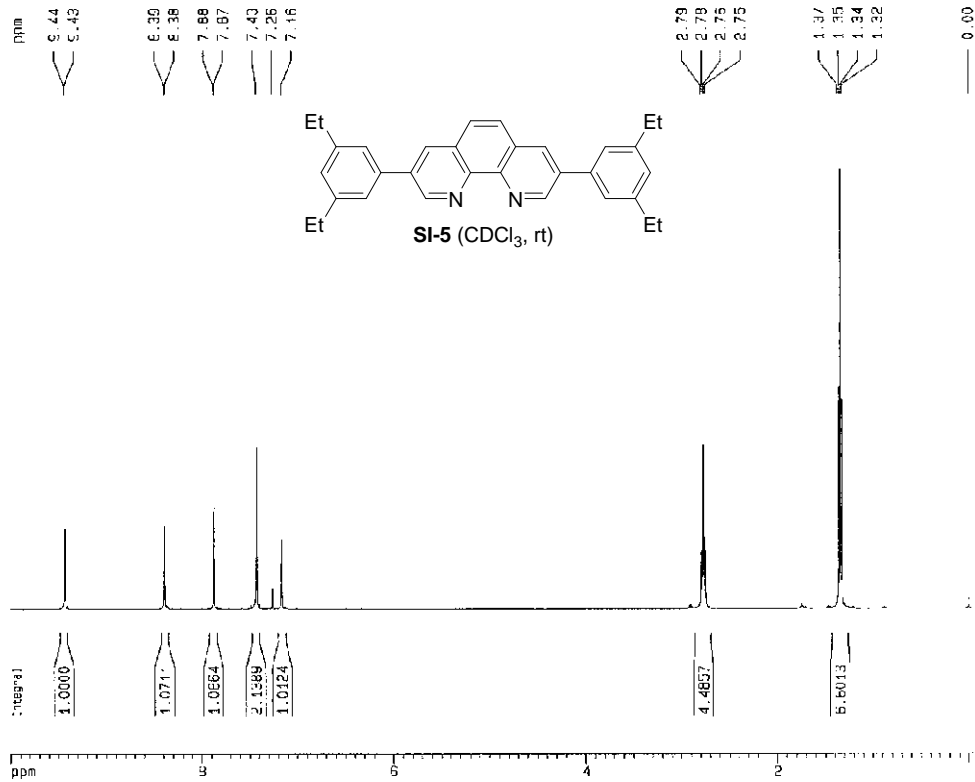

Current Data Parameters  
 NAME L317-1-A  
 EXNO 1  
 PROCNO 2

F2 - Acquisition Parameters  
 Date 20110110  
 Time 14:02  
 INSTRUM spect  
 PROBEID 5 mm QNP 1H  
 PULPROG zg  
 TD 48072  
 SOLVENT CDCl3  
 NS 6  
 DS 4  
 SWH 400.146670 MHz  
 FIDRES 0.166670 Hz  
 AQ 2.6999997 sec  
 RG 67  
 DW 62.400 usec  
 DE 4.50 usec  
 TE 300.2 K  
 D1 3.0000000 sec

CHANNEL 11  
 NUC1 1H  
 P1 9.00 usec  
 PL1 0.00 dB  
 SFO1 500.1325000 MHz

F2 - Processing Parameters  
 SI 65536  
 SF 500.1300129 MHz  
 NDW 64  
 SSB 0  
 LB 0.30 Hz  
 GB 0  
 PC 1.00

1H NMR plot parameters  
 CX 20.00 cm  
 F1P 10.000 ppm  
 F1 5001.30 Hz  
 F2P -0.100 ppm  
 F2 50.61 Hz  
 PPMCM 0.50500 ppm/cm  
 HZCM 252.56566 Hz/cm

97/10/17, #5, 122.5 mg

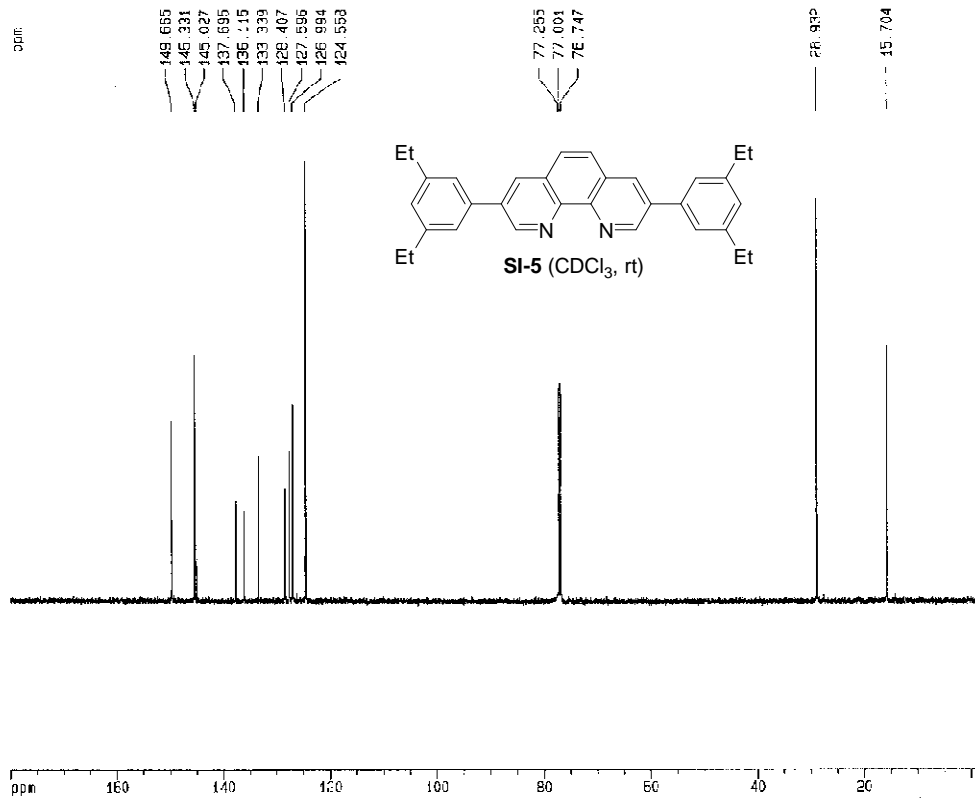

Current Data Parameters  
 NAME L117-1-A-BCH  
 EXNO 1  
 PROCNO 2

F2 - Acquisition Parameters  
 Date 20110110  
 Time 15:22  
 INSTRUM spect  
 PROBEID 5 mm QNP 1H  
 PULPROG zgpg30  
 TD 112760  
 SOLVENT CDCl3  
 NS 160  
 DS 4  
 SWH 37502.984 MHz  
 FIDRES 6.333339 Hz  
 AQ 1.5033240 sec  
 RG 3102  
 DW 13.300 usec  
 DE 7.50 usec  
 TE 300.2 K  
 D1 4.0000000 sec  
 d11 0.0300000 sec

CHANNEL 11  
 NUC1 13C  
 P1 3.00 usec  
 PL1 3.00 dB  
 SFO1 125.7671708 MHz

CHANNEL 12  
 NUC2 1H  
 P2 93.00 usec  
 PL2 120.00 dB  
 SFO2 500.1300129 MHz

F2 - Processing parameters  
 SI 32768  
 SF 125.7672961 MHz  
 NDW 64  
 SSB 0  
 LB 1.00 Hz  
 GB 0  
 PC 1.40

13C NMR plot parameters  
 CX 20.00 cm  
 F1P 100.000 ppm  
 F1 252635.40 Hz  
 F2P -1.000 ppm  
 F2 125.76 Hz  
 PPMCM 9.05000 ppm/cm  
 HZCM 1138.10791 Hz/cm

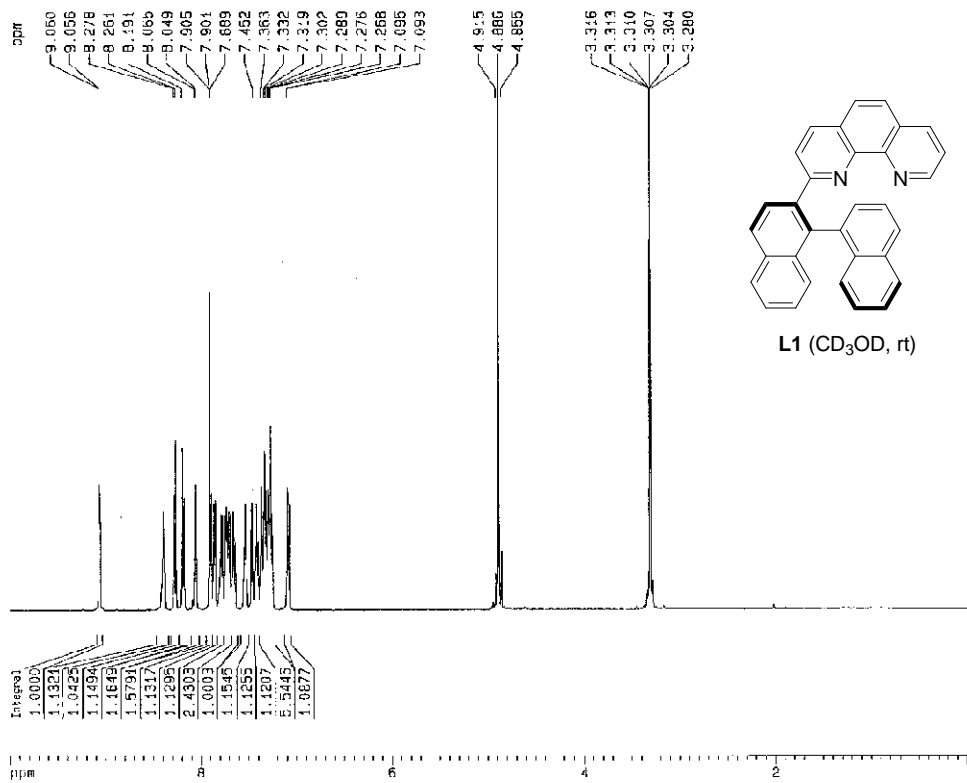

Current Data Parameters  
 NAME L40 3-A  
 EXPNO 1  
 PROCNO 2

F2 - Acquisition Parameters  
 DATE\_ 20101201  
 TIME 16:48  
 INSTRUM spect  
 PROBP0 5 mm QNP 1H  
 PULPROG zg  
 TD 4096  
 SOLVENT MeOH  
 NS 16  
 DS 0  
 SWH 8012.820 Hz  
 FIDRES 0.366670 Hz  
 AQ 2.9999224 sec  
 RG 256  
 DW 62.400 usec  
 DE 4.50 usec  
 TE 300.0 K  
 D1 3.0000000 sec

===== CHANNEL f1 =====  
 NUC1 1H  
 P1 9.00 usec  
 PL1 0.00 dB  
 SFO1 500.1326006 MHz

F2 - Processing parameters  
 SI 65538  
 SF 500.1300110 MHz  
 MHZ EM  
 SSB 0  
 LB 0.50 Hz  
 GB 0  
 PC 1.00

1D NMR plot parameters  
 CX 20.00 cm  
 F1P 10.000 ppm  
 F1 5001.50 MHz  
 F2P -9.100 ppm  
 F2 -50.61 Hz  
 PPMFM 0.50600 ppm/cm  
 HZCM 252.58566 Hz/cm

07/10/17, #5, 122.5 mg

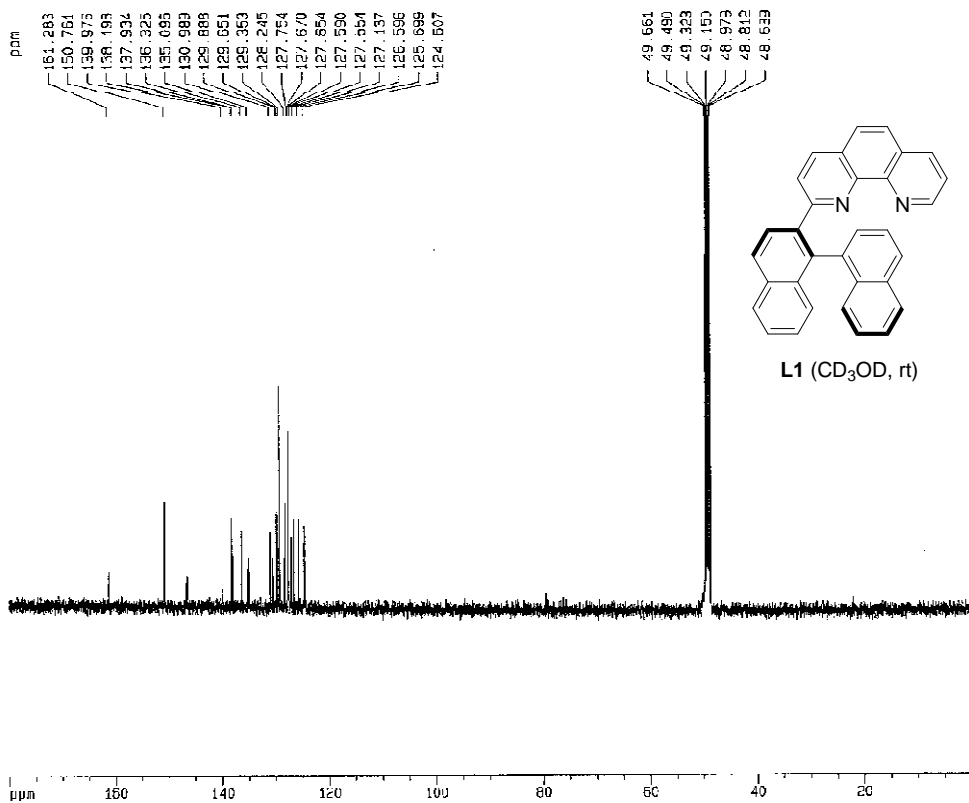

Current Data Parameters  
 NAME L40 3-A-13C  
 EXPNO 1  
 PROCNO 2

F2 - Acquisition Parameters  
 DATE 20101201  
 TIME 17:14  
 INSTRUM spect  
 PROBP0 5 mm QNP 1H  
 PULPROG zgpg30  
 TD 112768  
 SOLVENT MeOH  
 NS 320  
 DS 0  
 SWH 17589.964 Hz  
 FIDRES 0.333329 Hz  
 AQ 1.0000240 sec  
 RG 8192  
 DW 13.300 usec  
 DE 7.50 usec  
 TE 300.0 K  
 U1 4.0000000 sec  
 d11 0.0300000 sec

===== CHANNEL f1 =====  
 NUC1 13C  
 P1 8.00 usec  
 PL1 3.00 dB  
 SFO1 125.7671708 MHz

===== CHANNEL f2 =====  
 NUC2 1H  
 P2 90.00 usec  
 PL2 19.00 dB  
 PL12 20.00 dB  
 SFO2 500.1339000 MHz

F2 - Processing parameters  
 SI 32768  
 SF 125.7575939 MHz  
 MHZ EM  
 SSB 0  
 LB 1.00 Hz  
 GB 0  
 PC 1.40

1D NMR plot parameters  
 CX 20.00 cm  
 F1P 100.620 ppm  
 F1 28200.37 Hz  
 F2P -1.360 ppm  
 F2 -125.76 Hz  
 PPMFM 9.05706 ppm/cm  
 HZCM 1130.10588 Hz/cm

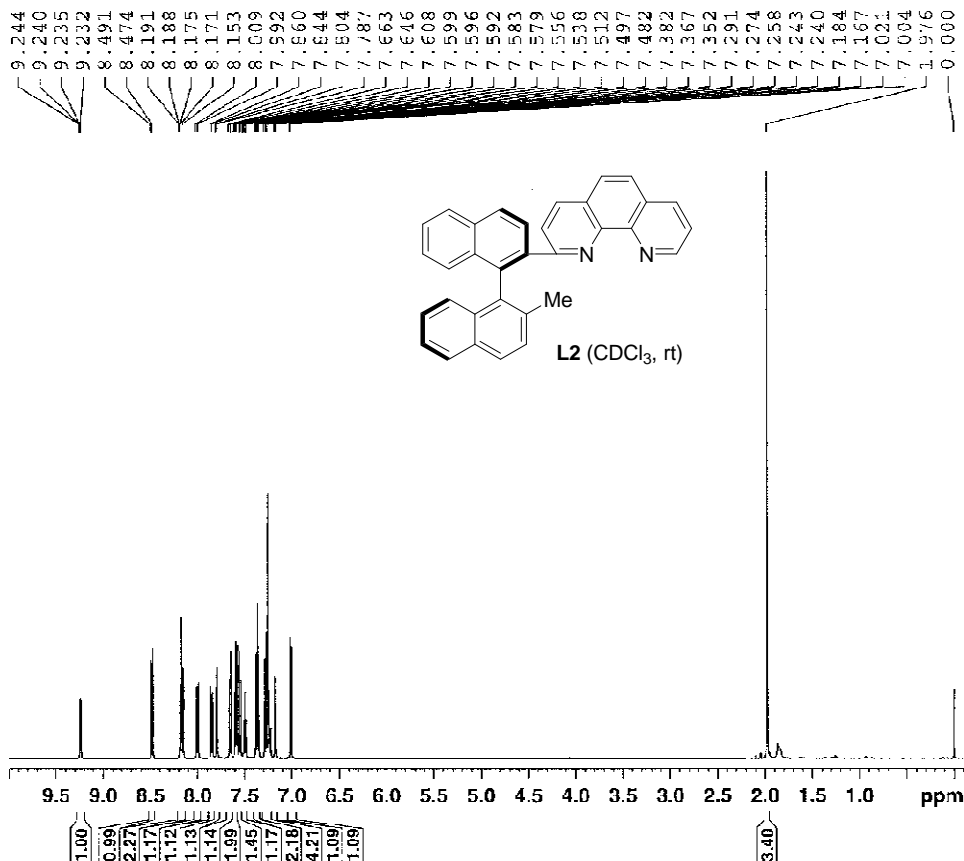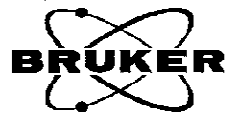

Current Data Parameters  
 NAME L21-2-A  
 EXPNO 1  
 PROCNO 1

F2 - Acquisition Parameters  
 Date\_ 20101129  
 Time 11.03  
 INSTRUM spect  
 PROBHD 5 mm PABBI IH/  
 PULPROG zg  
 TD 59998  
 SOLVENT CDCl3  
 NS 8  
 DS 0  
 SWH 10000.000 Hz  
 FIDRES 0.166672 Hz  
 AQ 2.9999499 sec  
 RG 90.5  
 DW 50.000 usec  
 DE 7.50 usec  
 TE 295.4 K  
 D1 1.6000000 sec  
 TD0 1

===== CHANNEL f1 =====  
 NUC1 1H  
 P1 5.33 usec  
 PL1 0.00 dB  
 SFO1 499.8729992 MHz

F2 - Processing parameters  
 SI 32768  
 SF 499.8700191 MHz  
 WDW SM  
 SSB 0  
 FR 0.30 Hz  
 GB 0  
 FC 1.00

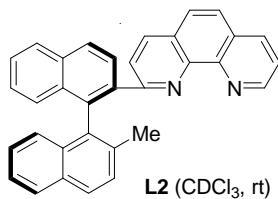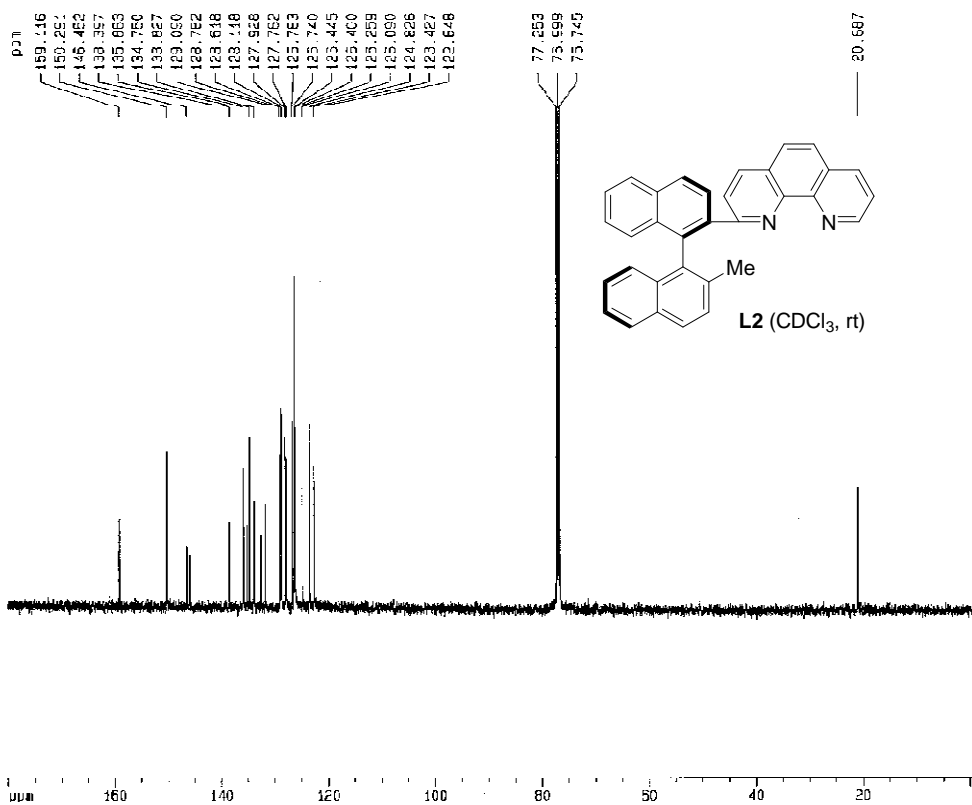

Current Data Parameters  
 NAME L21-1-A-B04  
 EXPNO 1  
 PROCNO 2

F2 - Acquisition Parameters  
 Date\_ 20101202  
 Time 0.18  
 INSTRUM spect  
 PROBHD 5 mm DNP 1H  
 PULPROG zgpg30  
 TD 112780  
 SOLVENT CDCl3  
 NS 400  
 DS 0  
 SWH 37593.884 Hz  
 FIDRES 0.333338 Hz  
 AQ 1.5000249 sec  
 RG 8192  
 DW 13.300 usec  
 DE 7.50 usec  
 TE 300.0 K  
 D1 4.0000000 sec  
 D11 0.0300000 sec

===== CHANNEL f1 =====  
 NUC1 13C  
 P1 8.00 usec  
 PL1 3.00 dB  
 SFO1 125.7671708 MHz

===== CHANNEL f2 =====  
 CPDPRG2 waltz16  
 NUC2 1H  
 PULPR2 50.00 usec  
 PL2 120.00 dB  
 PL12 20.00 dB  
 SFO2 500.1360000 MHz

F2 - Processing parameters  
 SI 47264  
 SF 125.7577950 MHz  
 WDW EM  
 SSB 0  
 LB 1.00 Hz  
 GB 0  
 FC 1.40

f1: NMR plot parameters  
 EX 20.00 dB  
 LSF 150.000 ppm  
 F1 22536.40 Hz  
 F2 -1.000 ppm  
 F2 -125.76 Hz  
 PPMCM 9.95000 ppm/cm  
 HZCM 1138.10751 Hz/cm

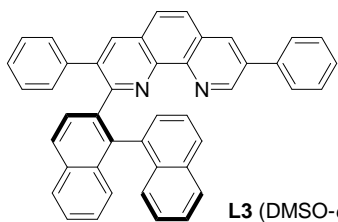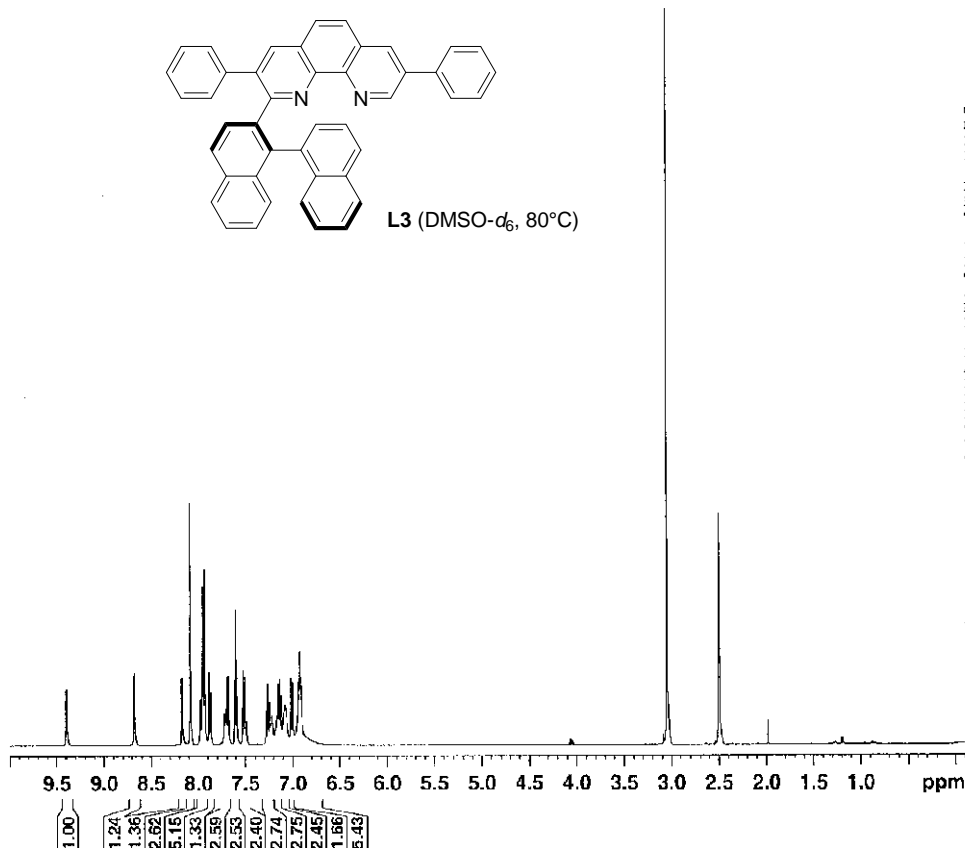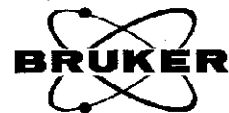

Current Data Parameters  
 NAME L55-4-A-VT80-1  
 EXPNO 1  
 PROCNO 1

F2 - Acquisition Parameters  
 Date\_ 20101219  
 Time 16.55  
 INSTRUM spect  
 PROBHD 5 mm PABBI 1H/  
 PULPROG zg  
 TD 59998  
 SOLVENT DMSO  
 NS 8  
 DS 0  
 SWH 10000.000 Hz  
 FIDRES 0.166572 Hz  
 AQ 2.9999499 sec  
 RG 161.3  
 DW 50.000 usec  
 DE 7.50 usec  
 TE 353.2 K  
 D1 1.0000000 sec  
 TDO 1

===== CHANNEL f1 =====  
 NUC1 1H  
 P1 5.35 usec  
 PL1 0.00 dB  
 SFO1 499.8719997 MHz

F2 - Processing parameters  
 SI 32768  
 SF 499.8700093 MHz  
 WDW EM  
 SSB 0  
 LB 0.30 Hz  
 GB 0  
 PC 1.00

137.59  
147.98  
149.58  
136.20  
135.36  
135.16  
134.27  
134.13  
133.62  
132.37  
132.22  
132.02  
129.98  
128.68  
128.08  
127.91  
127.64  
127.34  
127.07  
126.99  
126.84  
126.74  
126.26  
125.68  
125.72  
125.57  
124.77  
124.53  
124.06

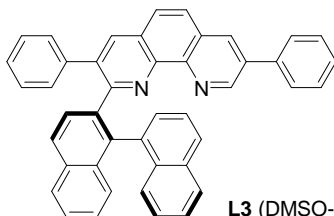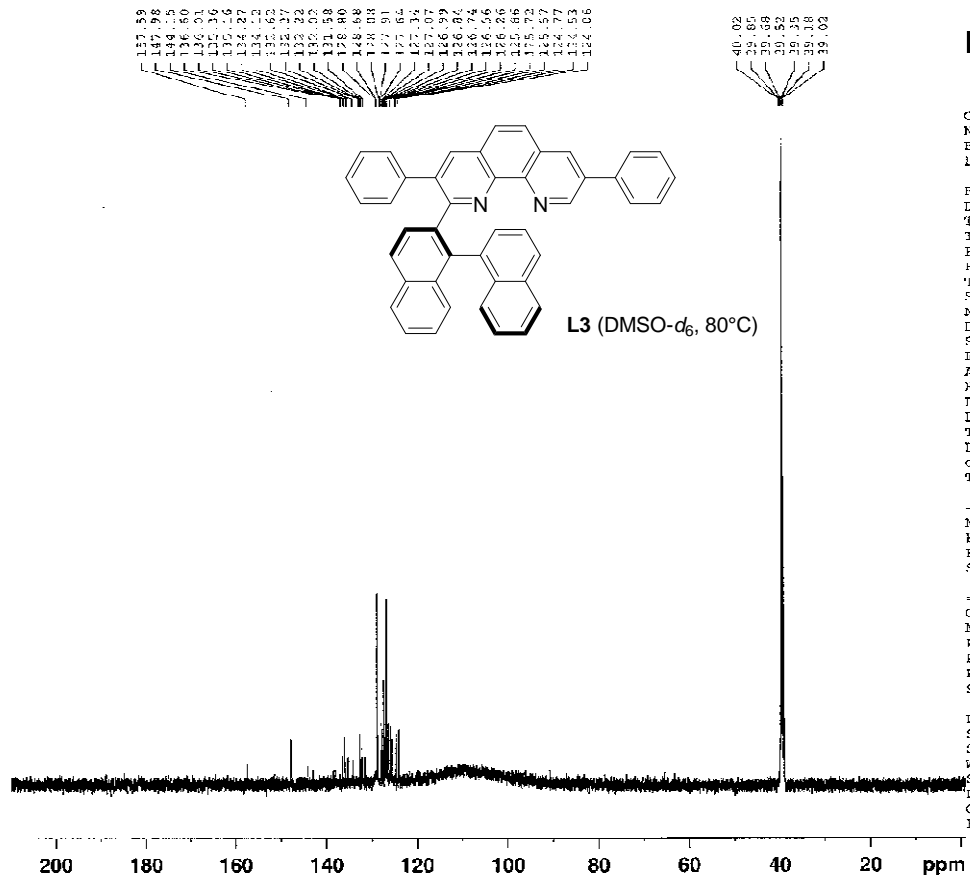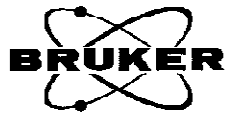

Current Data Parameters  
 NAME L55-4-A-BCN0-VT80-3  
 EXPNO 1  
 PROCNO 1

F2 - Acquisition Parameters  
 Date\_ 20101226  
 Time 15.48  
 INSTRUM spect  
 PROBHD 5 mm PABBI 1H/  
 PULPROG zgpg30  
 TD 136390  
 SOLVENT DMSO  
 NS 2002  
 DS 0  
 SWH 37593.984 Hz  
 FIDRES 0.275697 Hz  
 AQ 1.8136380 sec  
 RG 14596.5  
 DW 13.300 usec  
 DE 7.50 usec  
 TE 353.0 K  
 D1 2.0000000 sec  
 d11 0.0300000 sec  
 TDO 1

===== CHANNEL f1 =====  
 NUC1 13C  
 P1 12.00 usec  
 PL1 -3.00 dB  
 SFO1 125.7024654 MHz

===== CHANNEL f2 =====  
 CPDPRG2 waltz16  
 NUC2 1H  
 PCPD2 90.00 usec  
 PL2 0.00 dB  
 PL12 28.00 dB  
 SFO2 499.8734991 MHz

F2 - Processing parameters  
 SI 32768  
 SF 125.5925253 MHz  
 WDW FM  
 SSB C  
 LB 1.00 Hz  
 GB C  
 PC 2.40

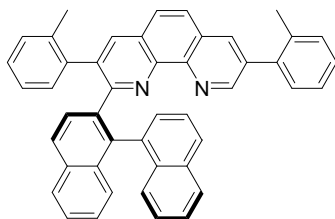

L4 (DMSO-d<sub>6</sub>, 80°C)

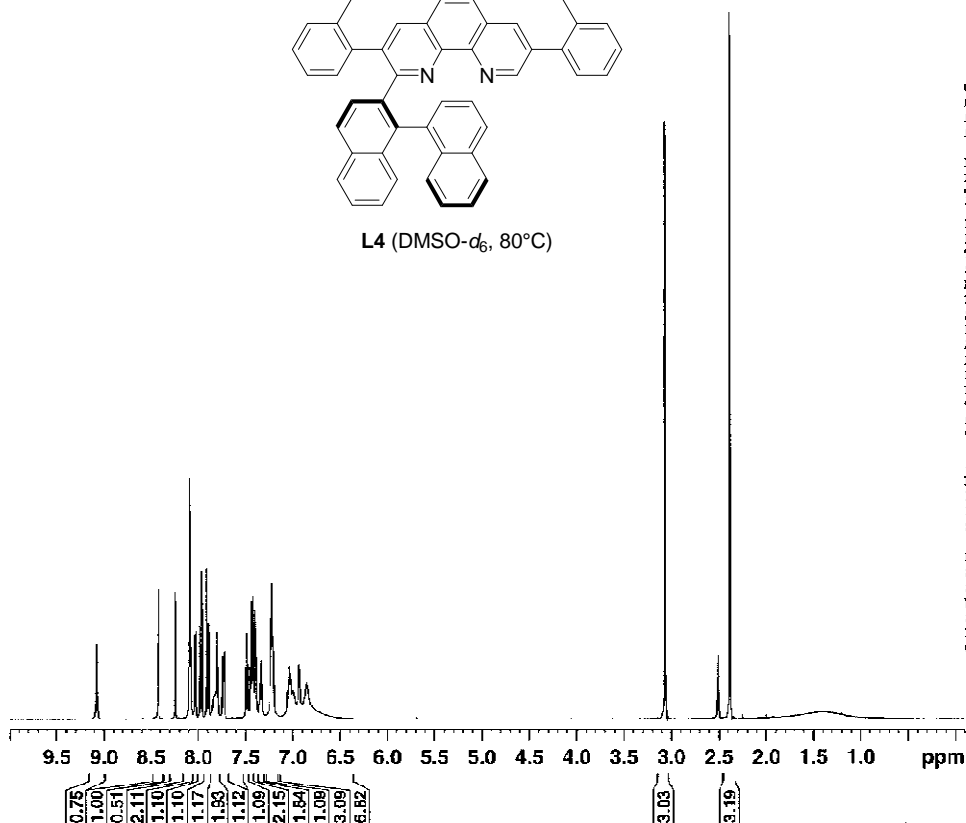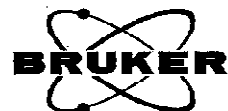

Current Data Parameters  
 NAME: L74-2-A-0980  
 EXPNO: 1  
 PROCNO: 1

F2 - Acquisition Parameters  
 Date\_: 20110206  
 Time: 22.08  
 INSTRUM: spect  
 PROBHD: 5 mm PABBI 1H/  
 PULPROG: zg  
 TD: 59998  
 SOLVENT: DMSO  
 NS: 8  
 DS: 0  
 SWH: 10000.800 Hz  
 FIDRES: 0.166672 Hz  
 AQ: 2.9999499 sec  
 RG: 57  
 LW: 50.000 usec  
 DE: 7.50 usec  
 TE: 353.6 K  
 D1: 1.0000000 sec  
 ED0: 1

----- CHANNEL f1 -----  
 NUC1: 1H  
 P1: 5.35 usec  
 PL1: 0.00 dB  
 SFO1: 499.8729932 MHz

F2 - Processing parameters  
 SI: 32758  
 SF: 499.8700043 MHz  
 WDW: EM  
 SSB: 0  
 LB: 0.30 Hz  
 GB: 0  
 PC: 1.00

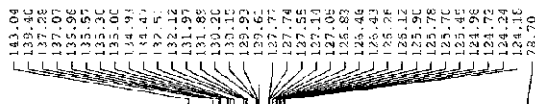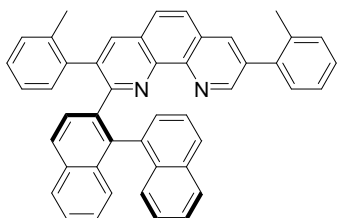

L4 (DMSO-d<sub>6</sub>, 80°C)

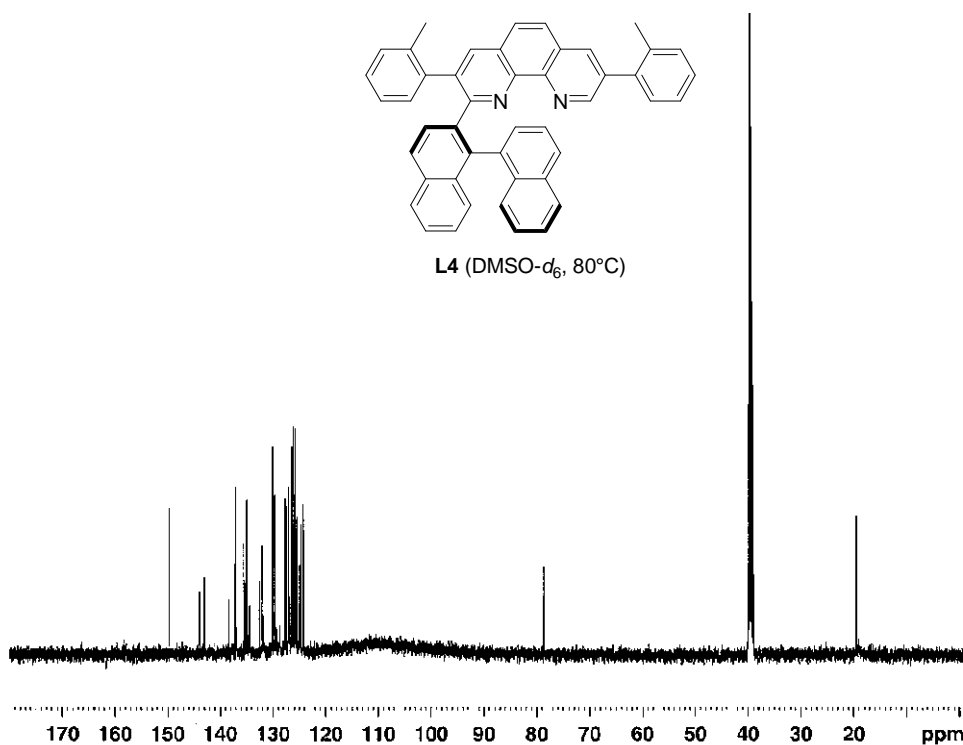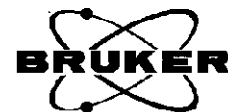

Current Data Parameters  
 NAME: L74-2-A-098-V180  
 EXPNO: 1  
 PROCNO: 1

F2 - Acquisition Parameters  
 Date\_: 20110206  
 Time: 23.18  
 INSTRUM: spect  
 PROBHD: 5 mm PABBI 1H/  
 PULPROG: zgdc  
 TD: 136360  
 SOLVENT: DMSO  
 NS: 1000  
 DS: 0  
 SWH: 37593.984 Hz  
 FIDRES: 0.275697 Hz  
 AQ: 1.8136380 sec  
 RG: 13004  
 LW: 13.300 usec  
 DE: 7.50 usec  
 TE: 353.0 K  
 D1: 2.0000000 sec  
 d11: 0.0300000 sec  
 TDD: 1

----- CHANNEL f1 -----  
 NUC1: 13C  
 P1: 12.00 usec  
 PL1: -3.00 dB  
 SFO1: 125.7024664 MHz

----- CHANNEL f2 -----  
 CPDPRG2: waltz16  
 NUC2: 1H  
 PCPD2: 90.00 usec  
 PL2: 0.00 dB  
 PLL2: 28.00 dB  
 SFO2: 499.8734991 MHz

F2 - Processing parameters  
 SI: 32758  
 SF: 125.6925274 MHz  
 WDW: EM  
 SSB: 0  
 LB: 1.00 Hz  
 GB: 0  
 PC: 1.40

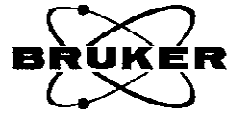

Current Data Parameters  
 NAME L94-6-A-DMSO-VT80  
 EXPNO 1  
 PROCNO 1

F2 - Acquisition Parameters  
 Date\_ 20101201  
 Time 23.00  
 INSTRUM spect  
 PROBD 5 mm PABBI 1H/  
 PULPROG zgpg30  
 TD 59998  
 SCLVNT DMSO  
 NS 8  
 DS 0  
 SWH 10000.000 Hz  
 FIDRES 0.156672 Hz  
 AQ 2.9999499 sec  
 RG 40.3  
 DW 50.000 usec  
 DE 7.50 usec  
 TR 352.7 K  
 D1 1.00000000 sec  
 TDO 1

===== CHANNEL f1 =====  
 NUC1 1H  
 P1 5.35 usec  
 PL1 0.00 dB  
 SFO1 499.8729592 MHz

F2 Processing parameters  
 SI 32768  
 SF 499.8730093 MHz  
 WDW EM  
 SSB 0  
 LB 0.30 Hz  
 GB 0  
 PC 1.00

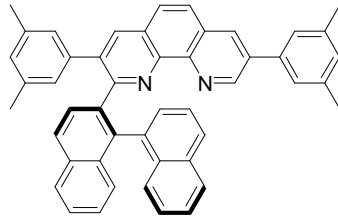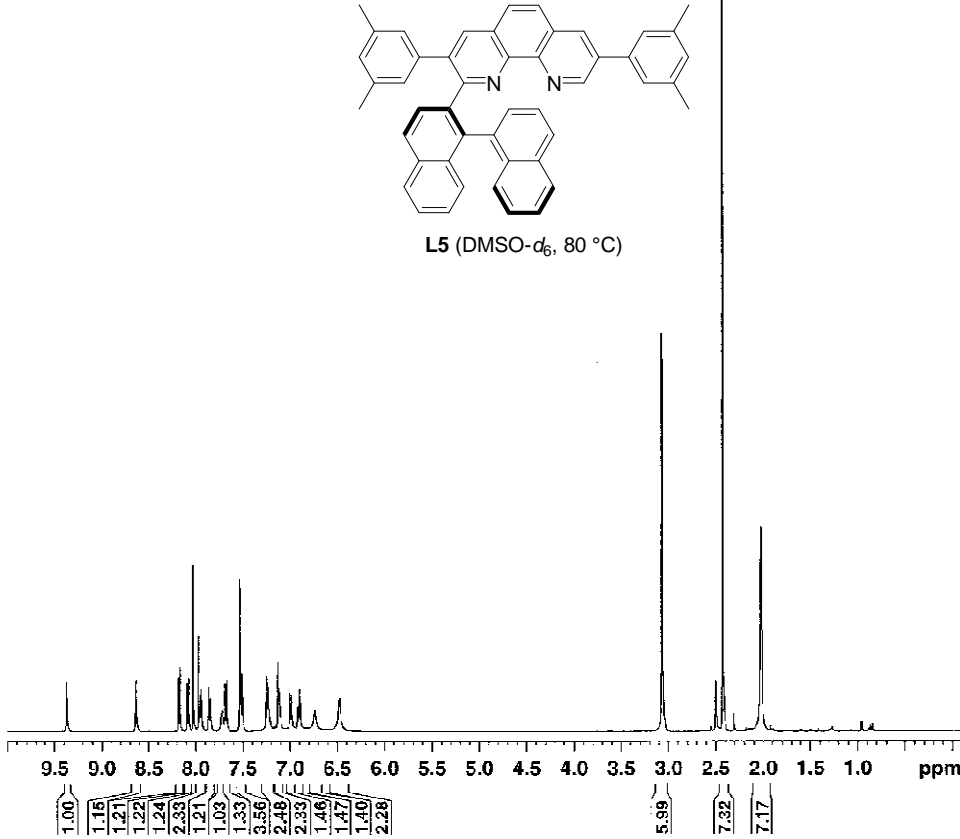

157.66  
 148.05  
 144.12  
 142.92  
 138.70  
 137.97  
 137.83  
 136.53  
 136.21  
 135.50  
 135.00  
 134.34  
 134.21  
 132.54  
 132.23  
 131.97  
 131.60  
 129.35  
 128.99  
 128.99  
 128.08  
 127.51  
 126.95  
 126.78  
 126.72  
 126.56  
 126.48  
 126.21  
 125.46  
 124.46  
 124.60  
 124.52  
 123.93

40.02  
 39.85  
 39.68  
 39.51  
 39.35  
 39.18  
 39.01  
 20.52  
 20.36

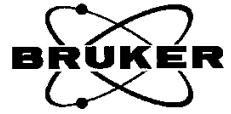

Current Data Parameters  
 NAME L94-6-A-DMSO-PCM-VT80  
 EXPNO 1  
 PROCNO 1

F2 - Acquisition Parameters  
 Date\_ 20101202  
 Time 0.02  
 INSTRUM spect  
 PROBD 5 mm PABBI 1H/  
 PULPROG zgpg30  
 TD 136360  
 SOLVENT DMSO  
 NS 800  
 DS 0  
 SWH 37593.984 Hz  
 FIDRES 0.275697 Hz  
 AQ 1.8136380 sec  
 RG 1839.4  
 DW 13.300 usec  
 DE 7.50 usec  
 TR 353.0 K  
 D1 2.00000000 sec  
 d11 0.03000000 sec  
 TDO 1

===== CHANNEL f1 =====  
 NUC1 13C  
 P1 12.00 usec  
 PL1 -3.00 dB  
 SFO1 125.7024664 MHz

===== CHANNEL f2 =====  
 CPDPRG2 waltz16  
 NUC2 1H  
 PCPD2 90.00 usec  
 PL2 0.00 dB  
 PL12 28.00 dB  
 SFO2 499.8734991 MHz

F2 Processing parameters  
 SI 32768  
 SF 125.6925261 MHz  
 WDW EM  
 SSB 0  
 LB 1.00 Hz  
 GB 0  
 PC 1.40

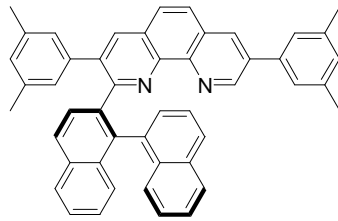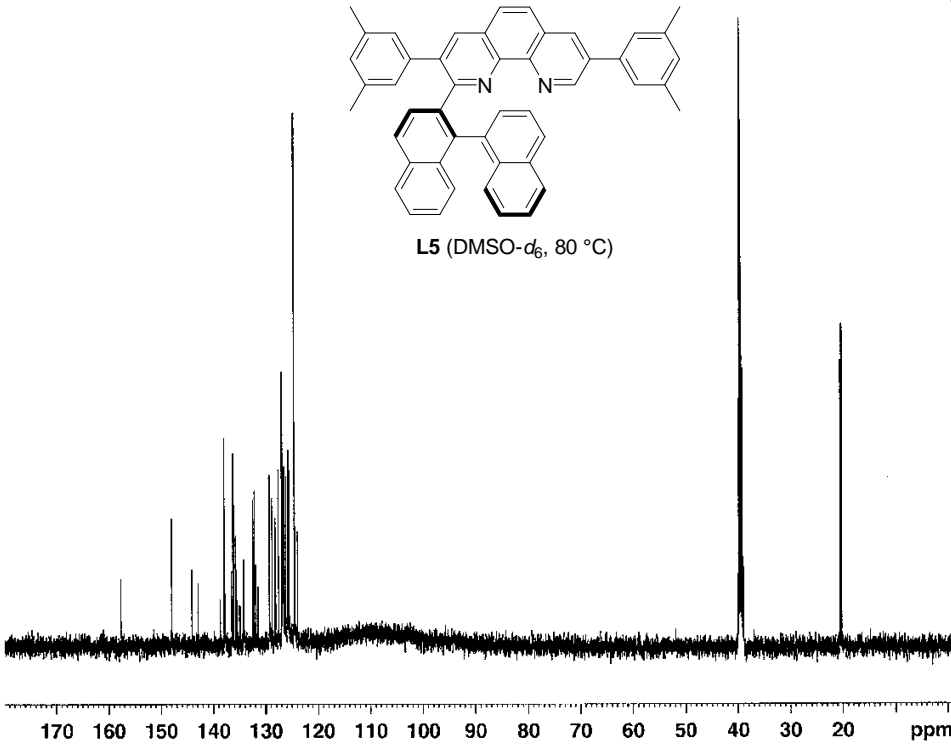

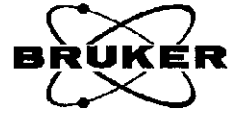

Current Data Parameters  
 NAME L119-1-A1-VF80  
 EXPNO -  
 PROCNO -

F2 - Acquisition Parameters  
 Date\_ 20110105  
 Time 8.50  
 INSTRUM spect  
 PROBHD 5 mm PABBI 1H/  
 PULPROG zg  
 TD 59998  
 SOLVENT DMSO  
 NS 8  
 DS 0  
 SWH 10000.000 Hz  
 FIDRES 0.166672 Hz  
 AQ 2.9999499 sec  
 RG 101.6  
 DW 50.000 usec  
 DE 7.50 usec  
 TE 354.3 K  
 D1 1.0000000 sec  
 TDO -

===== CHANNEL f1 =====  
 NUC1 1H  
 P1 5.35 usec  
 PL1 0.00 dB  
 SFO1 499.8729992 MHz

F2 - Processing parameters  
 SI 32768  
 SF 499.8700093 MHz  
 WDW EM  
 SSB 0  
 LB 0.30 Hz  
 GB 0  
 PC 1.00

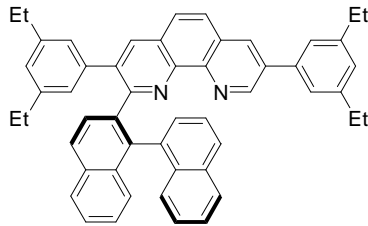

L6 (DMSO-d<sub>6</sub>, 80 °C)

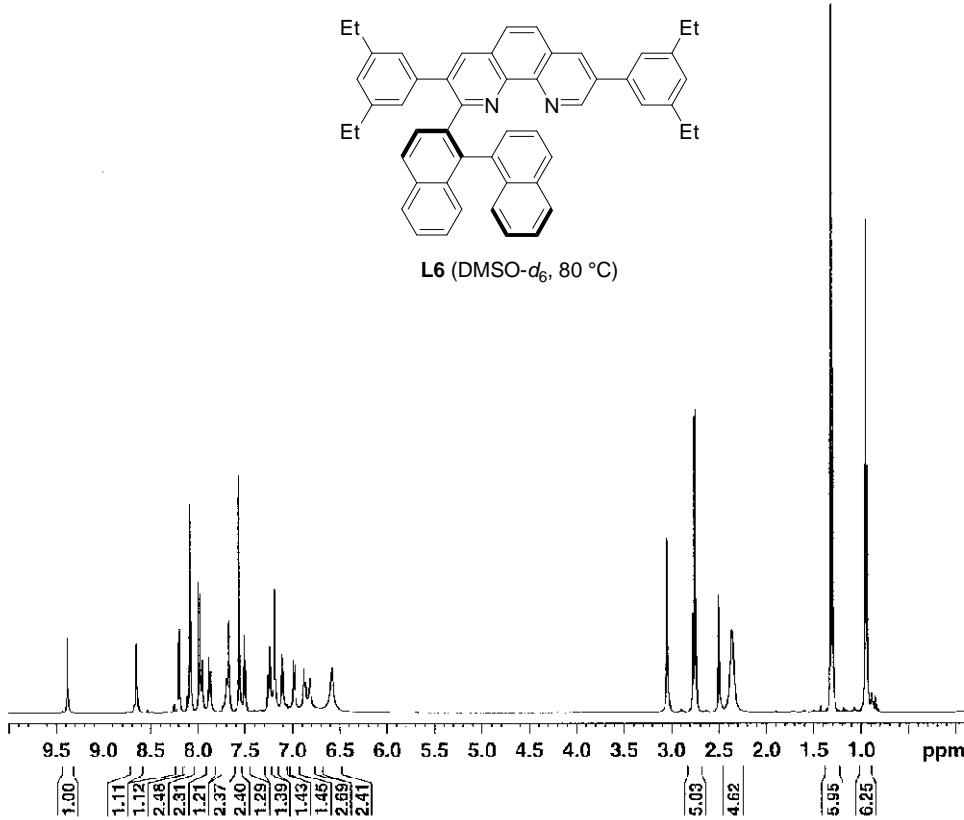

157.74  
 143.05  
 143.06  
 144.11  
 142.23  
 142.69  
 139.71  
 135.67  
 135.66  
 135.57  
 134.53  
 134.36  
 133.68  
 132.18  
 131.01  
 131.57  
 129.97  
 129.97  
 127.55  
 125.92  
 125.62  
 125.77  
 125.47  
 125.33  
 125.92  
 125.75  
 123.47  
 124.36  
 124.36  
 123.92  
 123.74

40.02  
 39.85  
 39.66  
 39.52  
 39.35  
 39.18  
 39.01  
 27.79  
 27.45  
 14.04  
 13.38

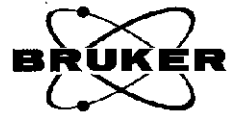

Current Data Parameters  
 NAME L119-1-A-FCM-VF80  
 EXPNO 1  
 PROCNO 1

F2 - Acquisition Parameters  
 Date\_ 20110116  
 Time 14.23  
 INSTRUM spect  
 PROBHD 5 mm PABBI 1H/  
 PULPROG zgdc  
 TD 136260  
 SOLVENT DMSO  
 NS 1200  
 DS 0  
 SWH 37593.984 Hz  
 FIDRES 0.275697 Hz  
 AQ 1.0116380 sec  
 RG 16384  
 DW 13.300 usec  
 DE 7.50 usec  
 TE 353.0 K  
 D1 2.0000000 sec  
 d1.1 0.0300000 sec  
 TDO 1

===== CHANNEL f1 =====  
 NUC1 13C  
 P1 12.00 usec  
 PL1 -3.00 dB  
 SFO1 125.7024864 MHz

===== CHANNEL f2 =====  
 CPDPRG2 waltz16  
 NUC2 1H  
 PCPD2 50.00 usec  
 PL2 0.00 dB  
 PL12 28.00 dB  
 SFO2 499.9734991 MHz

F2 - Processing parameters  
 SI 32768  
 SF 125.5925263 MHz  
 WDW EM  
 SSB C  
 LB 1.00 Hz  
 GB C  
 PC 1.40

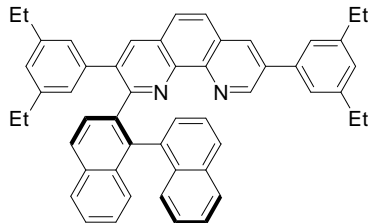

L6 (DMSO-d<sub>6</sub>, 80 °C)

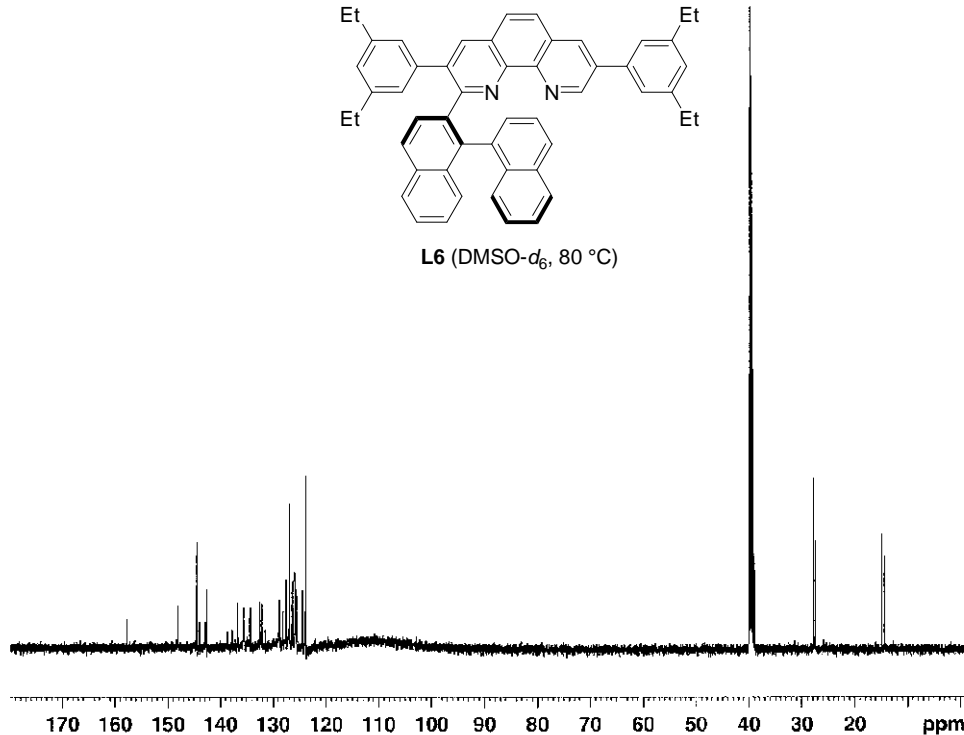

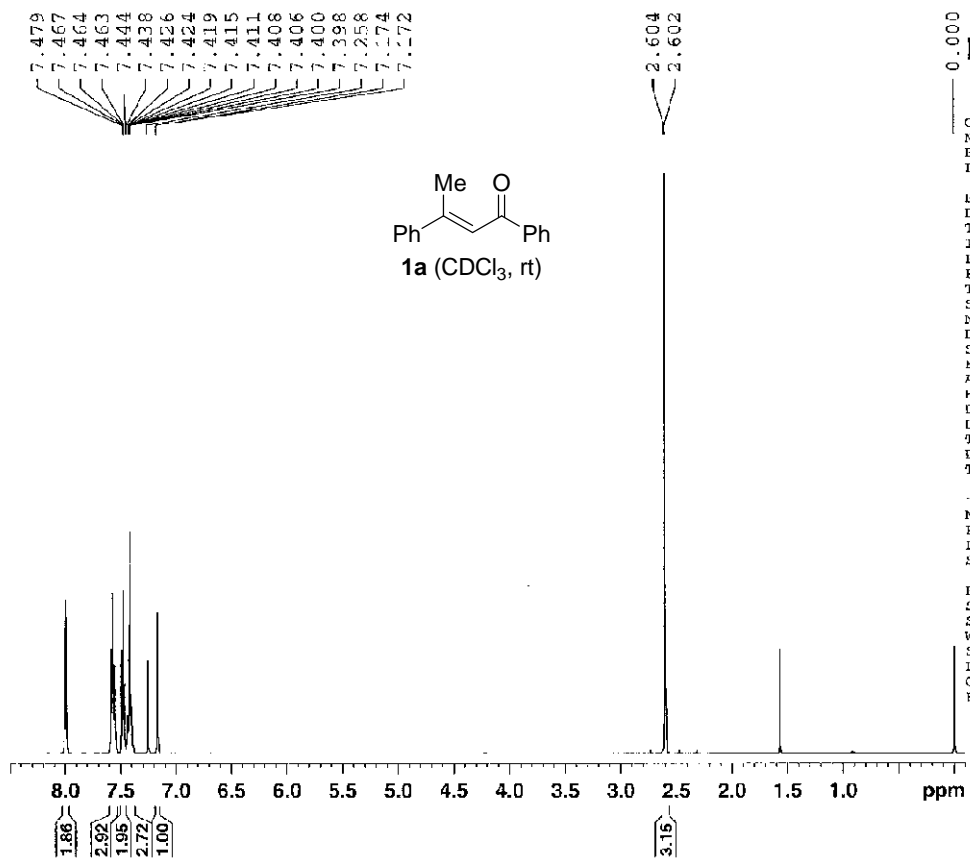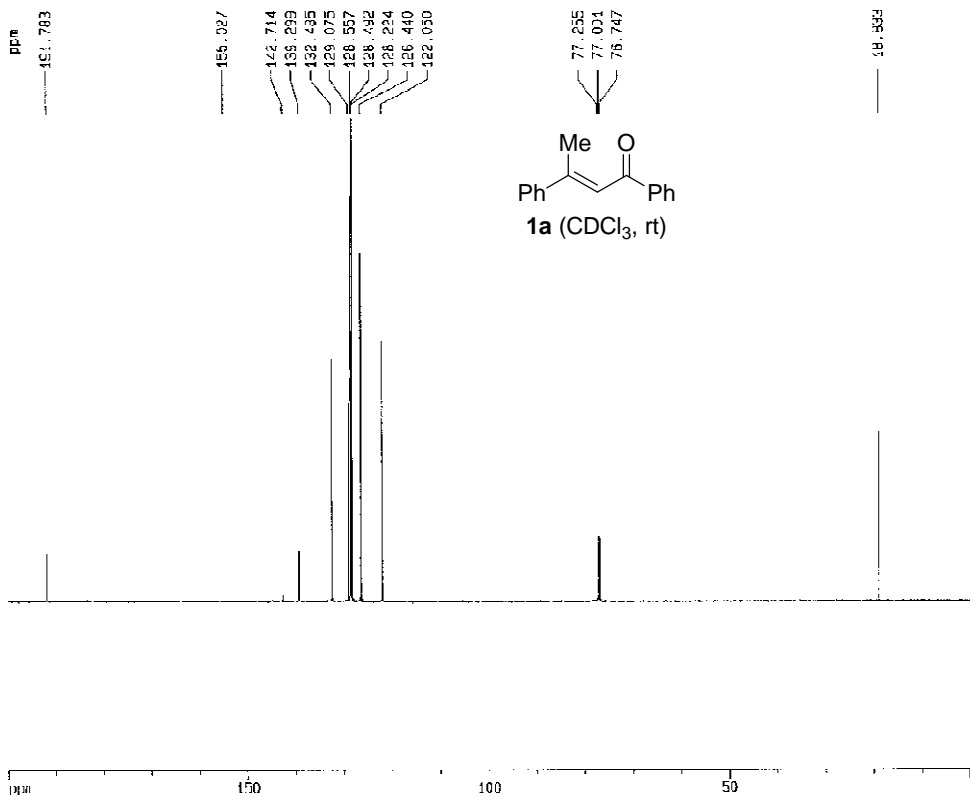



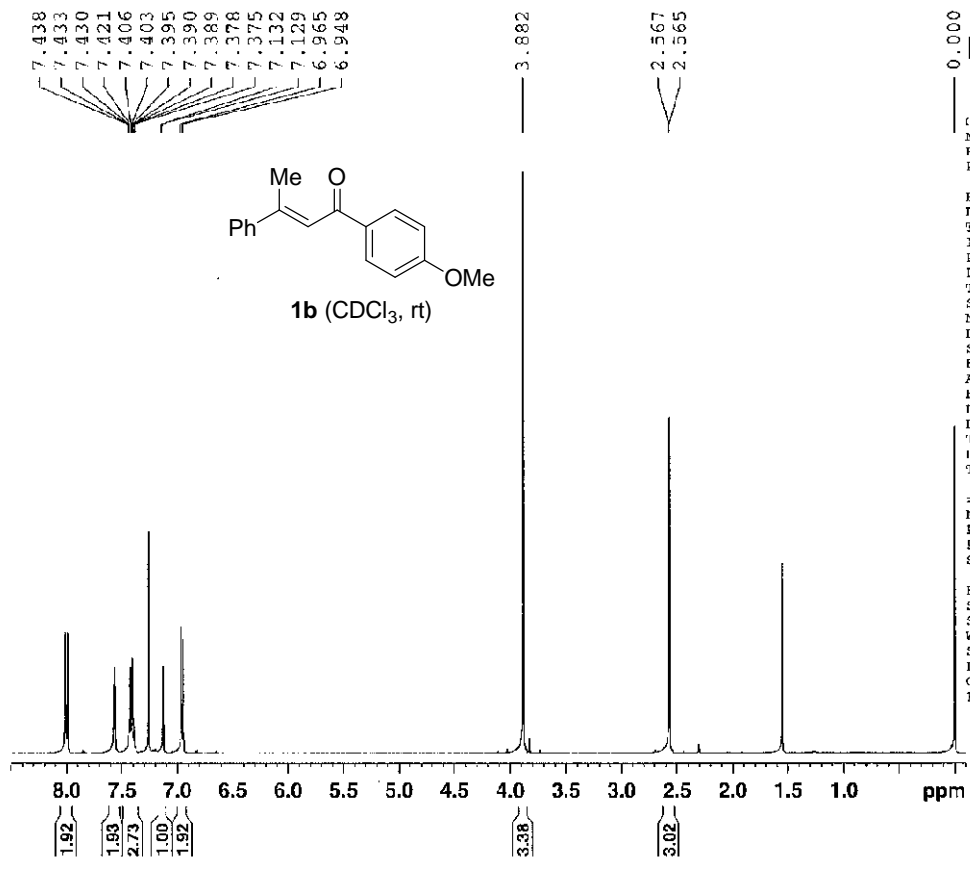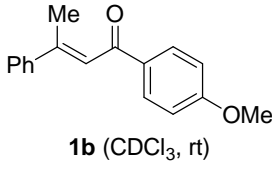

**BRUKER**

Current Data Parameters  
 NAME Sub88-1-A  
 EXPNO 5  
 PROCNO 1

F2 - Acquisition Parameters  
 Date\_ 20101105  
 Time 17.50  
 INSTRUM spect  
 PROBHD 5 mm PA3B1 LH/  
 PULPROG zgpg30  
 TD 59998  
 SOLVENT CDCl3  
 NS 8  
 DS 0  
 SWH 10000.000 Hz  
 FIDRES 0.166672 Hz  
 AQ 2.3989499 sec  
 RG 256  
 FW 50.000 usec  
 DE 7.50 usec  
 TE 294.6 K  
 D1 1.0000000 sec  
 TDO 1

==== CHANNEL f1 =====  
 NUC1 1H  
 P1 5.35 usec  
 PL1 0.00 dB  
 SFO1 499.8729992 MHz

F2 Processing parameters  
 SI 32768  
 SF 499.8700172 MHz  
 WDW EM  
 SGB 0  
 LB 0.30 Hz  
 GB 0  
 PC 1.00

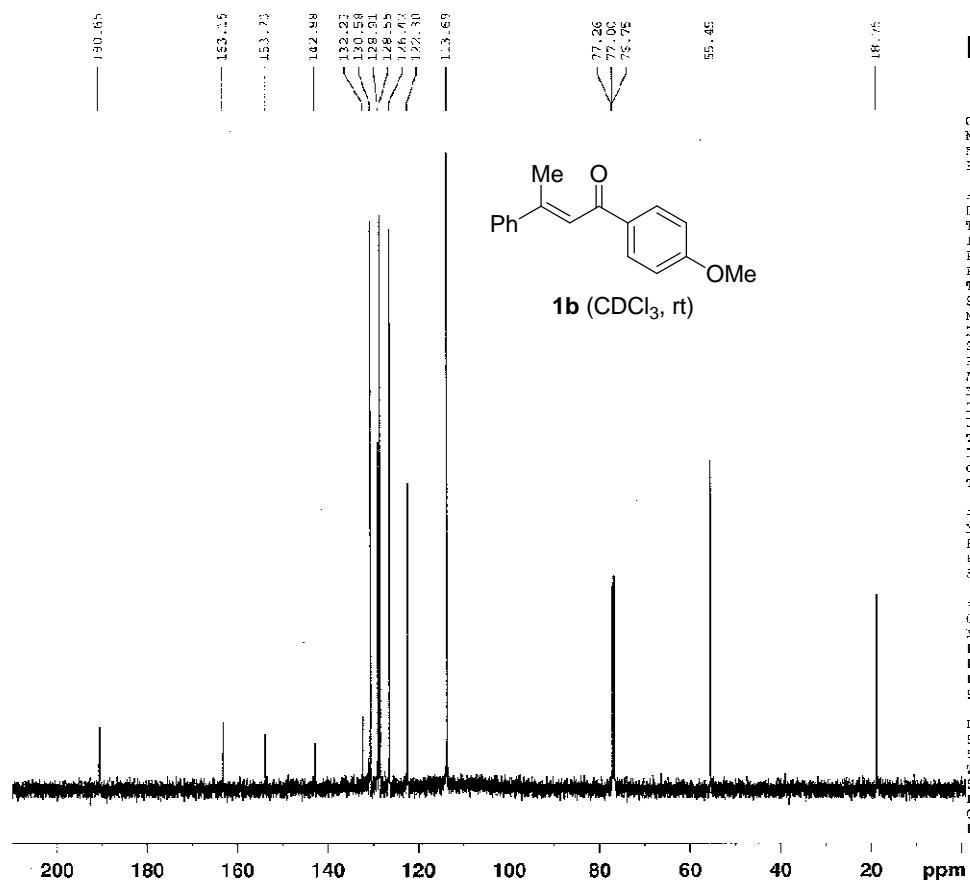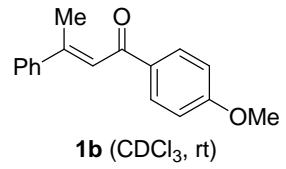

**BRUKER**

Current Data Parameters  
 NAME Sub58-1-A1-BCM  
 EXPNO 1  
 PROCNO 1

F2 - Acquisition Parameters  
 Date\_ 20101110  
 Time 23.21  
 INSTRUM spect  
 PROBHD 5 mm PABBI 1H/  
 PULPROG zgpg30  
 TD 135360  
 SOLVENT CDCl3  
 NS 340  
 DS 0  
 SWH 37593.984 Hz  
 FIDRES 0.275697 Hz  
 AQ 1.8135380 sec  
 RG 15384  
 DW 13.300 usec  
 DE 7.50 usec  
 TE 295.4 K  
 D1 2.0000000 sec  
 d11 0.0300000 sec  
 TDO 1

==== CHANNEL f1 =====  
 NUC1 13C  
 P1 12.00 usec  
 PL1 3.00 dB  
 SFO1 125.7024664 MHz

==== CHANNEL f2 =====  
 CPDPRG2 waltz16  
 NUC2 1H  
 PCPD2 90.00 usec  
 PL2 0.00 dB  
 PL12 28.00 dB  
 SFO2 499.8734991 MHz

F2 Processing parameters  
 SI 32768  
 SF 125.6924192 MHz  
 WDW EM  
 SGB 0  
 LB 1.00 Hz  
 GB 0  
 PC 1.40

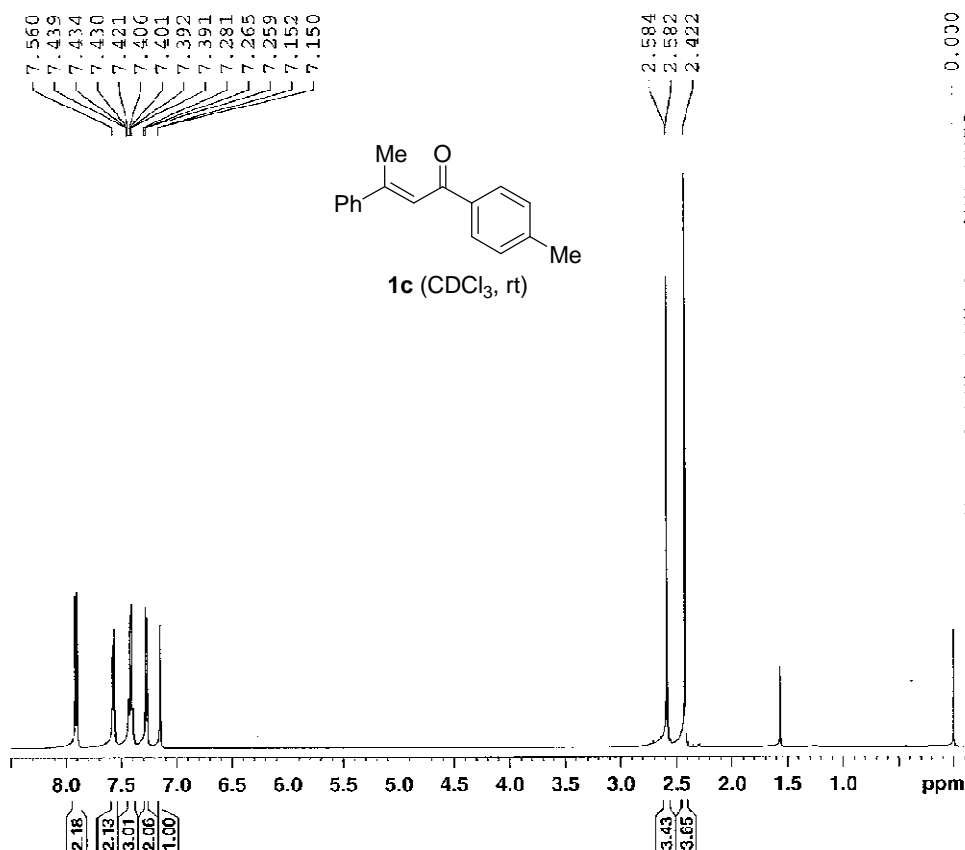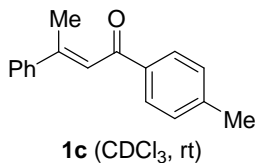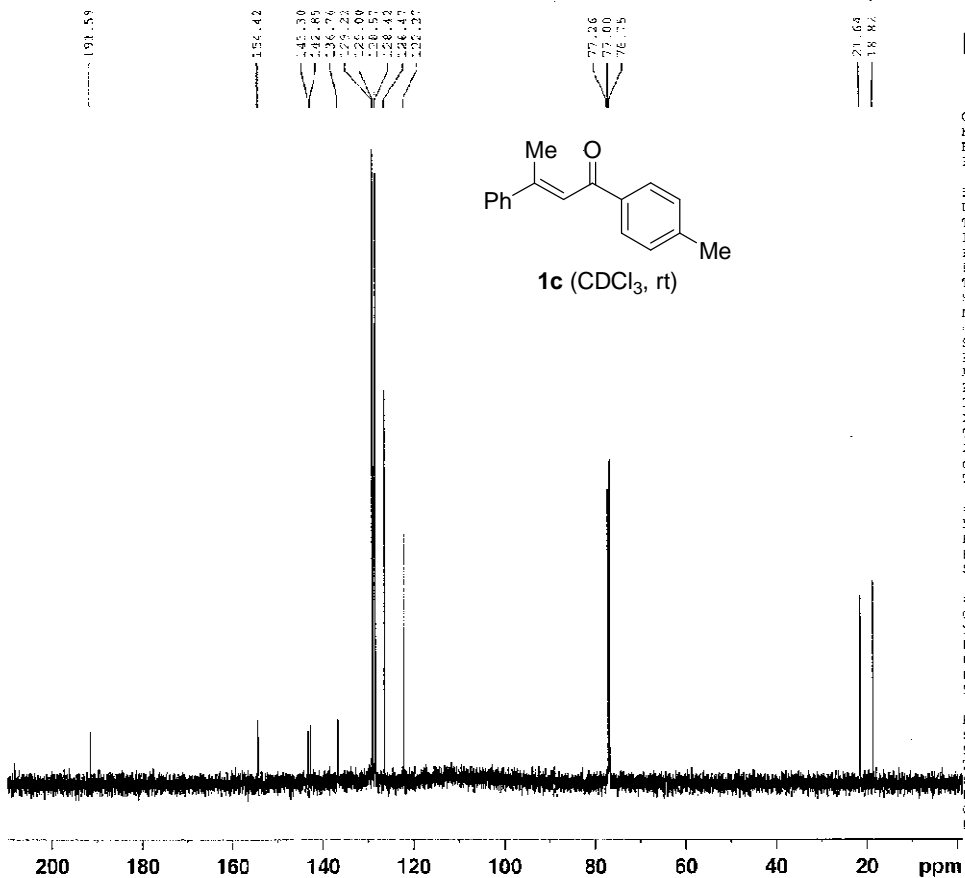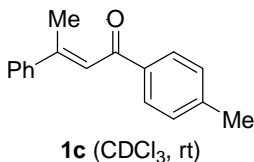

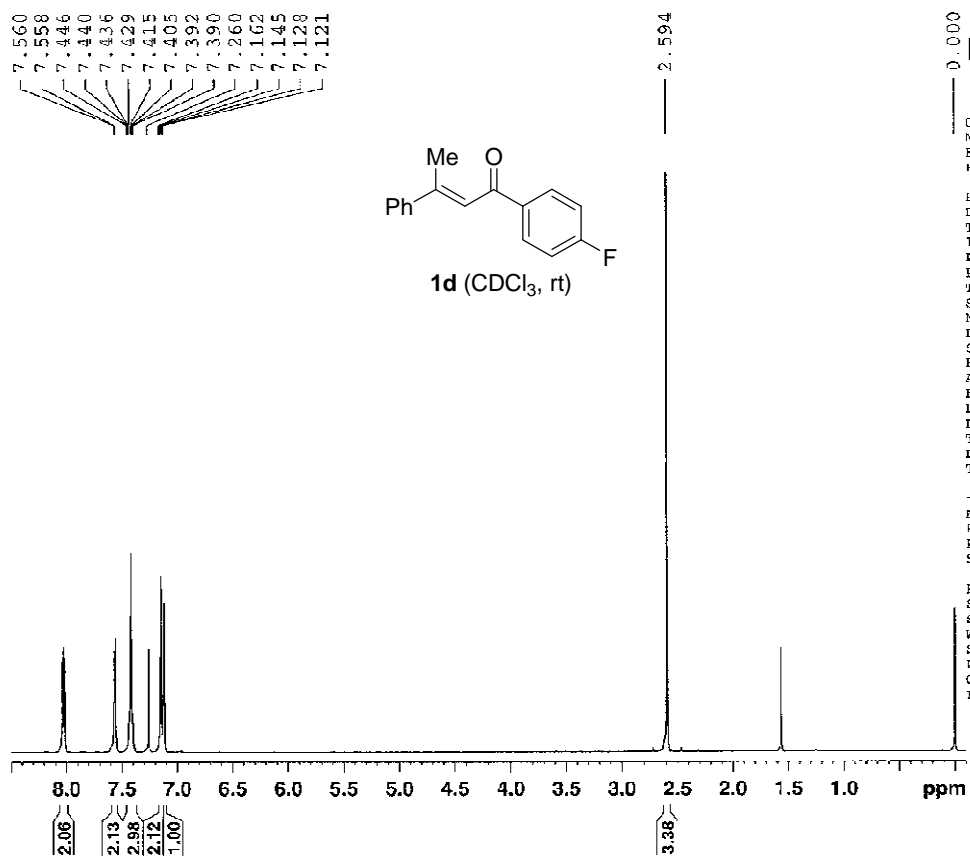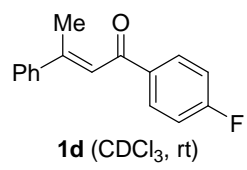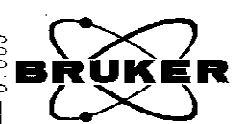

Current Data Parameters  
 NAME Sub60-1-A  
 EXPNO 1  
 PROCNO 1

F2 - Acquisition Parameters  
 Date\_ 20101109  
 Time 10.59  
 INSTRUM spect  
 PROBRD 5 mm EBBB1 1H/  
 PULPROG zg  
 TD 59998  
 SOLVENT CDCl3  
 NS 8  
 DS 0  
 SWH 10000.000 Hz  
 FIDRES 0.166672 Hz  
 AQ 2.9995499 sec  
 RG 161.3  
 LW 30.000 usec  
 DE 7.50 usec  
 TE 295.0 K  
 D1 1.0000000 sec  
 TD0 1

----- CHANNEL f1 -----  
 NUC1 1H  
 P1 7.50 usec  
 PL1 0.00 dB  
 SFO1 499.8729992 MHz

F2 - Processing parameters  
 SI 32768  
 SF 499.870079 MHz  
 WDW EM  
 SSB 0  
 LB 0.30 Hz  
 GB 0  
 EC 1.00

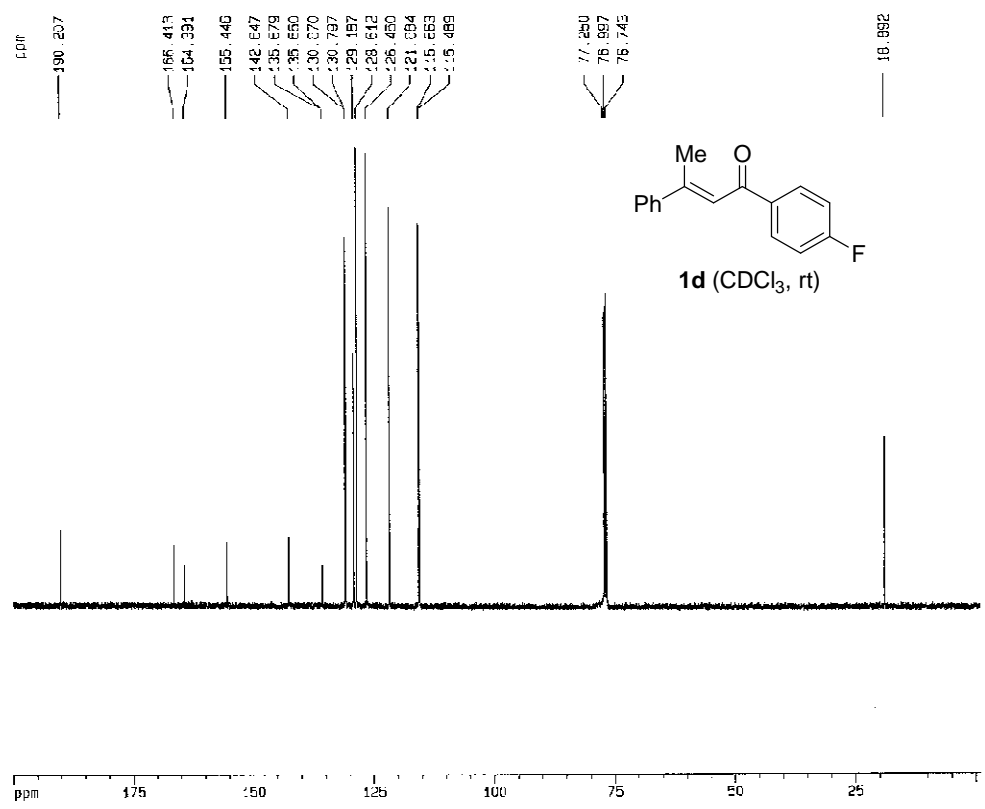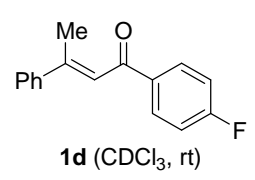

Current Data Parameters  
 NAME Sub60-1-A-BOM  
 EXPNO 1  
 PROCNO 2

F2 - Acquisition Parameters  
 Date\_ 2011203  
 Time 18.26  
 INSTRUM spect  
 PROBRD 5 mm BBO-1H  
 PULPROG zgpg30  
 TD 112760  
 SOLVENT CDCl3  
 NS 240  
 DS 0  
 SWH 37593.964 Hz  
 FIDRES 0.339320 Hz  
 AQ 1.0000240 sec  
 RG 8.82  
 LW 13.300 usec  
 DE 7.50 usec  
 TE 300.0 K  
 D1 4.0000000 sec  
 d11 0.0300000 sec

----- CHANNEL f1 -----  
 NUC1 13C  
 P1 0.00 usec  
 PL1 3.00 dB  
 SFO1 125.7671700 MHz

----- CHANNEL f2 -----  
 CPDPRG2 waltz16  
 NUC2 1H  
 PCH2 90.00 usec  
 PL2 120.00 dB  
 PL12 20.00 dB  
 SFO2 500.1330000 MHz

F2 - Processing parameters  
 SI 32768  
 SF 125.7577950 MHz  
 NMR EM  
 SSB 0  
 LB 1.00 Hz  
 GB 0  
 PC 1.40

10 NMR plot parameters  
 CX 20.00 cm  
 F1P 200.000 ppm  
 F1 25151.55 Hz  
 F2P -1.000 ppm  
 F2 -125.76 Hz  
 PPMEM 10.05000 ppm/cm  
 HZCM 1263.86662 Hz/cm

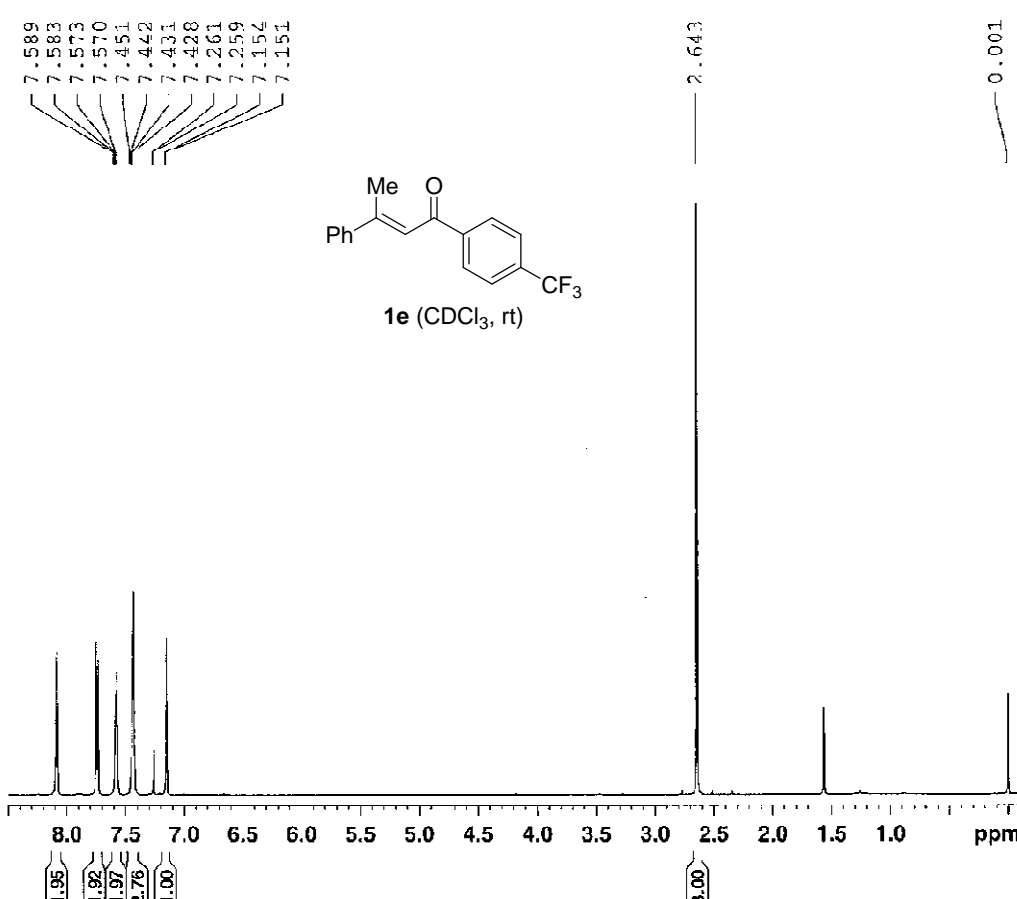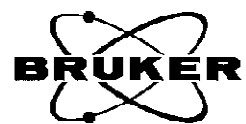

Current Data Parameters  
 NAME Sub107 2 A1  
 EXPNO 1  
 PROCNO 1

F2 - Acquisition Parameters  
 Date\_ 20110409  
 Time 0.46  
 INSTRUM spect  
 PROBHD 5 mm EBBB1 1H/  
 PULPROG zg  
 TD 59998  
 SOLVENT CDCl3  
 NS 16  
 DS 0  
 SWH 10000.000 Hz  
 FIDRES 0.165672 Hz  
 AQ 2.9999499 sec  
 RG 141  
 DW 50.000 usec  
 DE 7.50 usec  
 TE 680.7 K  
 D1 1.0000000 sec  
 TDO 1

----- CHANNEL f1 -----  
 NUC1 1H  
 P1 5.35 usec  
 PL1 0.00 dB  
 SFO1 499.8729992 MHz

F2 - Processing parameters  
 SI 32768  
 SF 499.8700191 MHz  
 WDW EM  
 SSB 0  
 LB 0.30 Hz  
 GB 0  
 PC 1.00

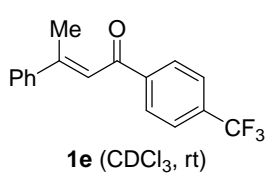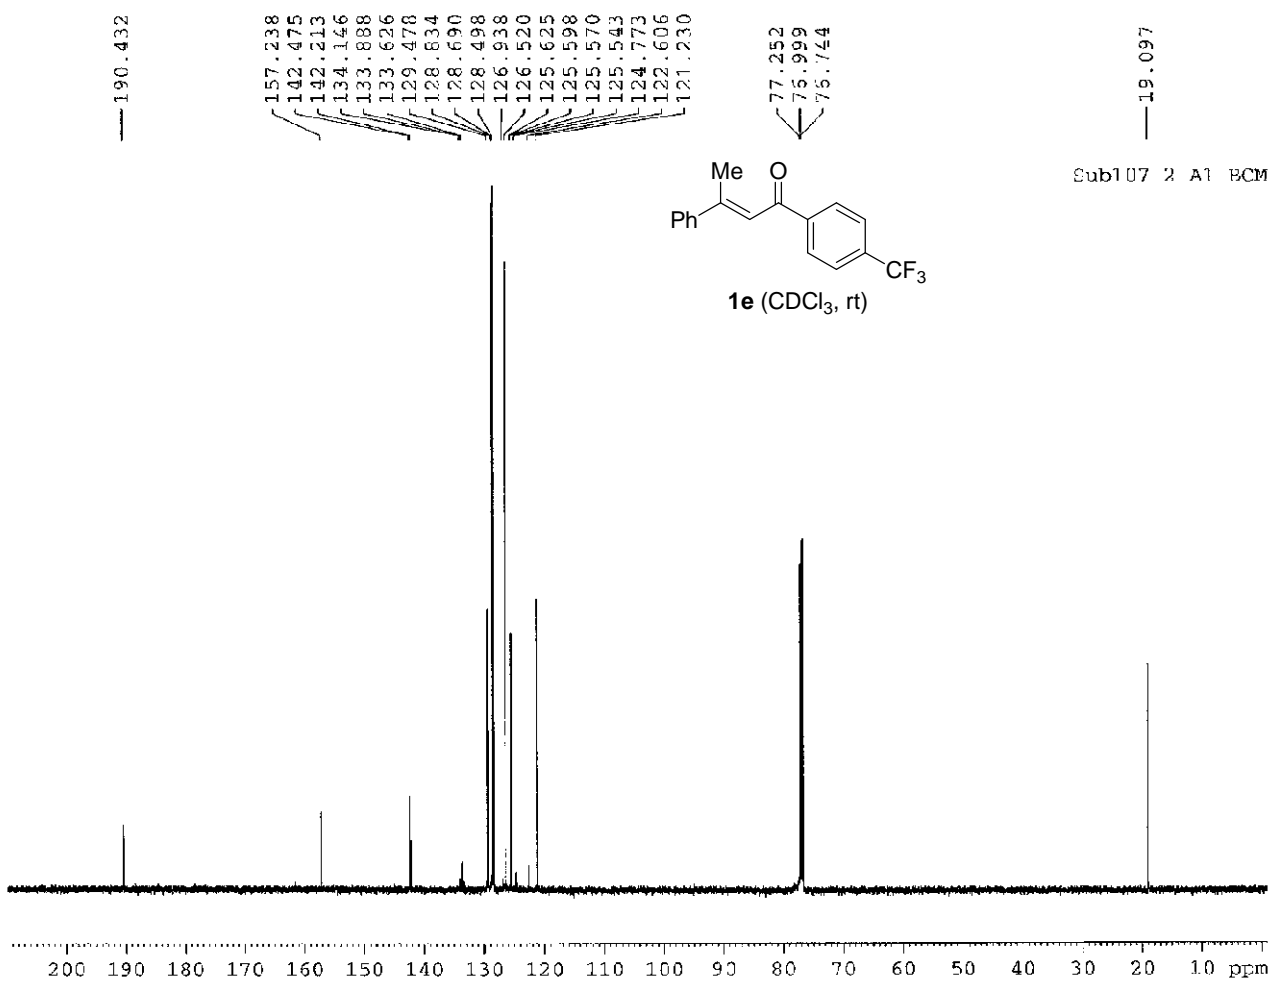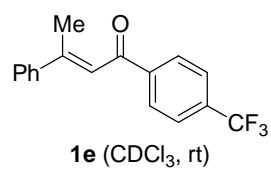

Sub107 2 A1 BCM

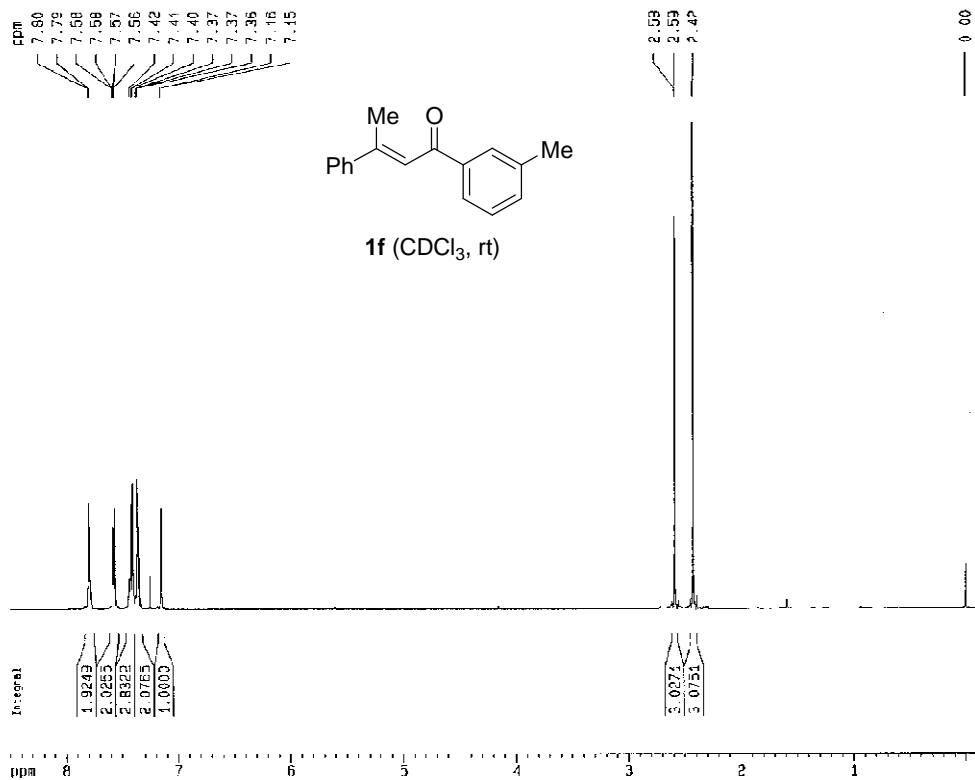

Current Data Parameters  
 NAME Sub101-1-A  
 EXPNO 1  
 FIDNO 2

F2 - Acquisition Parameters  
 Date\_ 20101216  
 Time 17:30  
 INSTRUM spect  
 PROBHD 5 mm QNP 1H  
 PULPROG zg  
 TD 48076  
 SOLVENT CDCl3  
 NS 3  
 DS 0  
 SWH 8012.820 Hz  
 FIDRES 0.166779 Hz  
 AQ 2.988824 sec  
 RG 128  
 CW 62.400 usec  
 DE 4.50 usec  
 TE 300.2 K  
 TI 3.0000000 sec

===== CHANNEL f1 =====  
 NUC1 13C  
 P1 9.00 usec  
 PL1 0.00 dB  
 SFO1 510.1329000 MHz

F2 - Processing parameters  
 SI 65535  
 SF 500.1360165 MHz  
 WHW EM  
 SSB 0  
 LB 0.30 Hz  
 GB 0  
 FC 1.00

1D NMR plot parameters  
 CX 20.00 cm  
 F1P 6.500 ppm  
 F1 4251.10 Hz  
 F2P 0.000 ppm  
 F2 -50.01 Hz  
 PPMCH 0.75000 ppm/cm  
 HZCM 215.05891 Hz/cm

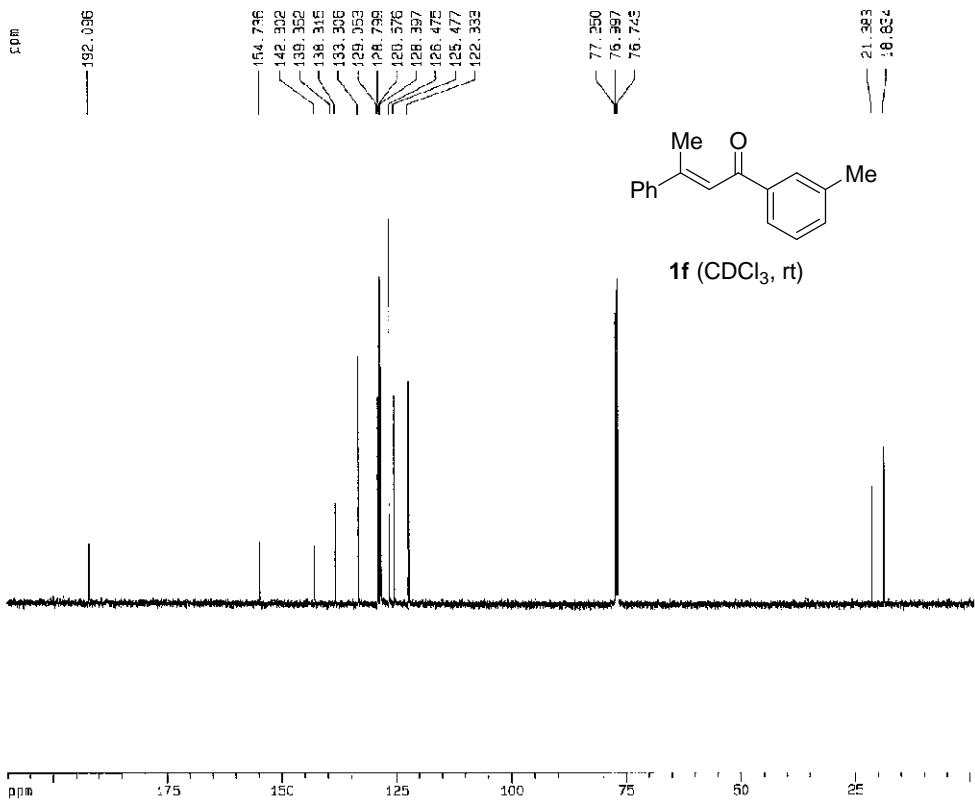

Current Data Parameters  
 NAME Sub101-1-A-824  
 EXPNO 1  
 FIDNO 2

F2 - Acquisition Parameters  
 Date\_ 20101216  
 Time 17:52  
 INSTRUM spect  
 PROBHD 5 mm QNP 1H  
 PULPROG zgpg30  
 TD 112780  
 SOLVENT CDCl3  
 NS 200  
 DS 0  
 SWH 37593.904 Hz  
 FIDRES 0.333329 Hz  
 AQ 1.5000740 sec  
 RG 4152  
 CW 13.300 usec  
 DE 7.50 usec  
 TE 300.2 K  
 TI 4.0000000 sec  
 D11 0.0300000 sec

===== CHANNEL f1 =====  
 NUC1 13C  
 P1 8.00 usec  
 PL1 3.00 dB  
 SFO1 125.7671700 MHz

===== CHANNEL f2 =====  
 NUC2 1H  
 P2 0.00 usec  
 PL2 120.00 dB  
 PL12 20.00 dB  
 SFO2 500.1338000 MHz

F2 - Processing parameters  
 SI 32768  
 SF 125.7671950 MHz  
 WHW EM  
 SSB 0  
 LB 1.00 Hz  
 GB 0  
 FC 1.40

1D NMR plot parameters  
 CX 20.00 cm  
 F1P 210.000 ppm  
 F1 26409.13 Hz  
 F2P -1.000 ppm  
 F2 -125.767 Hz  
 PPMCH 10.55000 ppm/cm  
 HZCM 1325.74463 Hz/cm

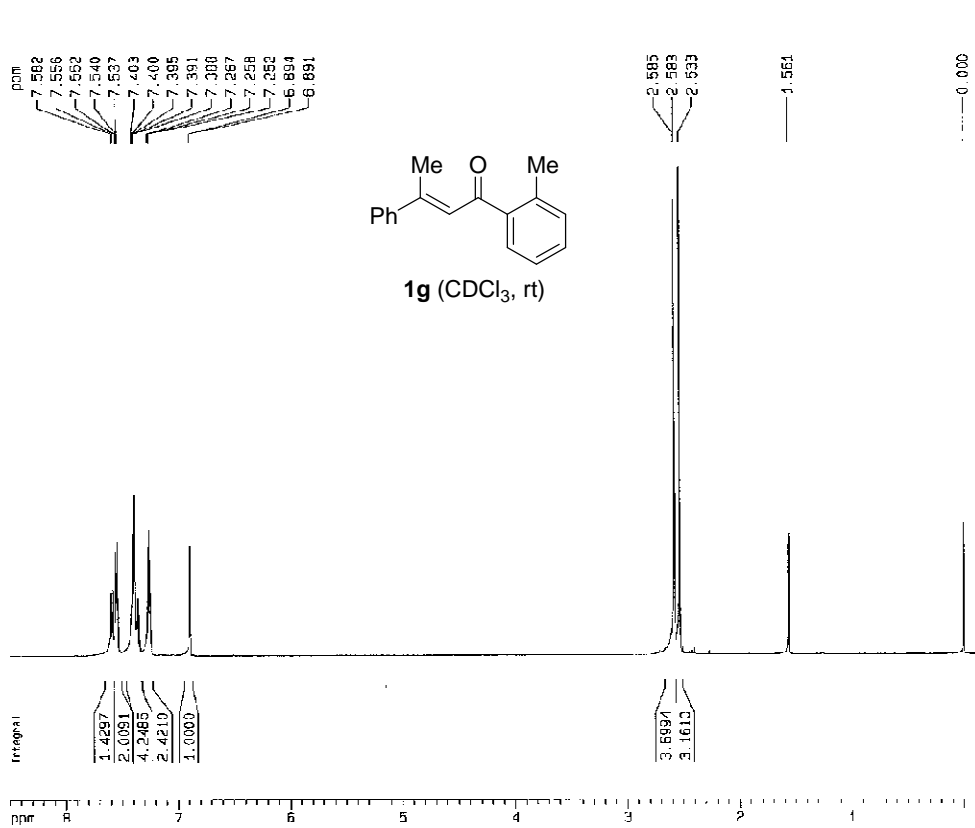

Current Data Parameters  
 NAME SUB61-1-A  
 EXPNO 1  
 PROCNO 2

F2 - Acquisition Parameters  
 Date\_ 2010109  
 Time 15.15  
 INSTRUM spect  
 PROBHD 5 mm QNP 1H  
 PULPROG zg  
 TD 48676  
 SOLVENT CDCl3  
 NS 8  
 DS 0  
 SWH 6012.620 Hz  
 FIDRES 0.166670 Hz  
 AQ 2.9599024 sec  
 RG 258  
 DW 62.400 usec  
 DE 4.50 usec  
 TC 300.0 K  
 NI 3.0000000 sec

===== CHANNEL f1 =====  
 NUC1 1H  
 P1 9.00 usec  
 PL1 0.00 dB  
 SFO1 500.1325006 MHz

F2 - Processing parameters  
 SI 65536  
 SF 500.1300144 MHz  
 WDW EM  
 SSB 0  
 LB 0.30 Hz  
 GB 0  
 PC 1.00

1D NMR plot parameters  
 CX 20.00 cm  
 F1 8.500 ppm  
 F2 4251.13 Hz  
 F3 -0.100 ppm  
 F4 -50.04 Hz  
 GPCM 0.43803 ppm/cm  
 HPCM 215.05583 Hz/cm

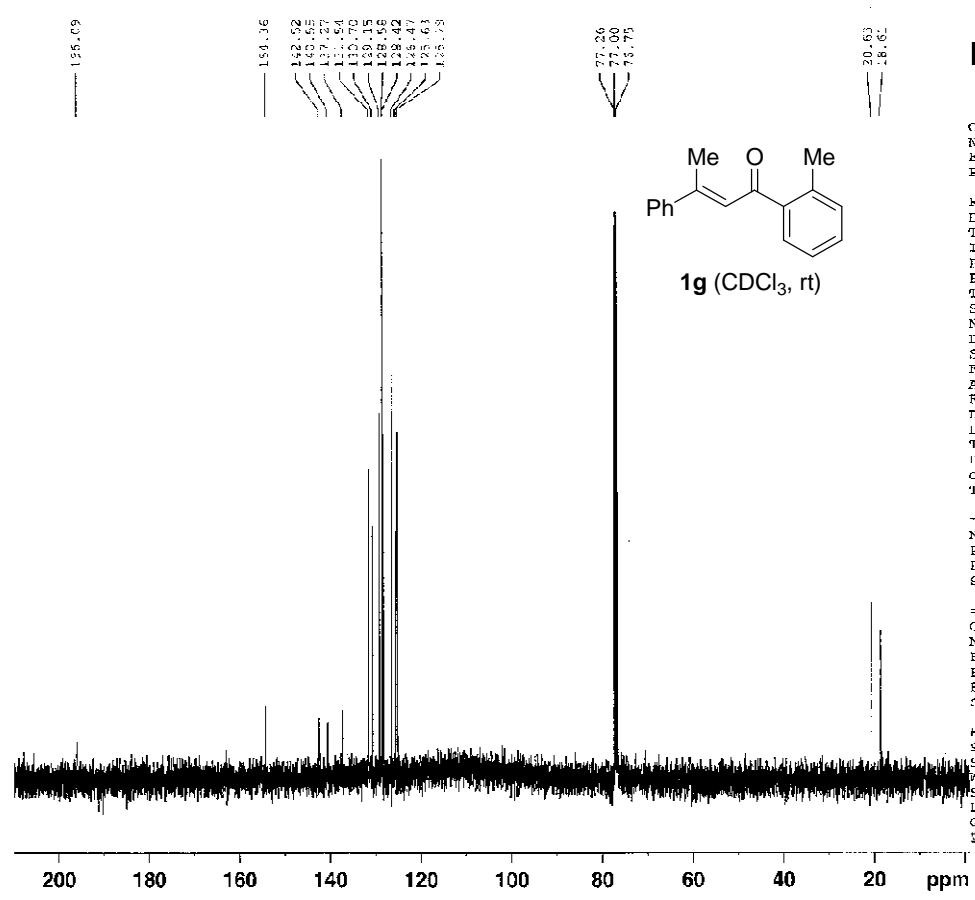

**BRUKER**

Current Data Parameters  
 NAME Sub61-1-A1-RUM  
 EXPNO 1  
 PROCNO 1

F2 - Acquisition Parameters  
 Date\_ 20101110  
 Time 23.56  
 INSTRUM spect  
 PROBHD 5 mm PABBI 1H/7  
 PULPROG zgdc  
 TD 136350  
 SOLVENT CDCl3  
 NS 240  
 DS 0  
 SWH 37593.934 Hz  
 FIDRES 0.275697 Hz  
 AQ 1.8136330 sec  
 RG 16334  
 DW 13.300 usec  
 DE 7.50 usec  
 TE 295.0 K  
 D1 2.0000000 sec  
 d11 0.0300000 sec  
 TD0 1

===== CHANNEL f1 =====  
 NUC1 13C  
 P1 12.00 usec  
 PL1 -3.00 dB  
 SFO1 125.7624654 MHz

===== CHANNEL f2 =====  
 CPDPRG2 waltz16  
 NUC2 1H  
 PCPD2 90.00 usec  
 PL2 0.00 dB  
 PL12 28.00 dB  
 SFO2 499.8734991 MHz

F2 - Processing parameters  
 SI 32768  
 SF 125.692417C MHz  
 WDW RM  
 SSB C  
 LB 1.00 Hz  
 GB C  
 PC 1.40

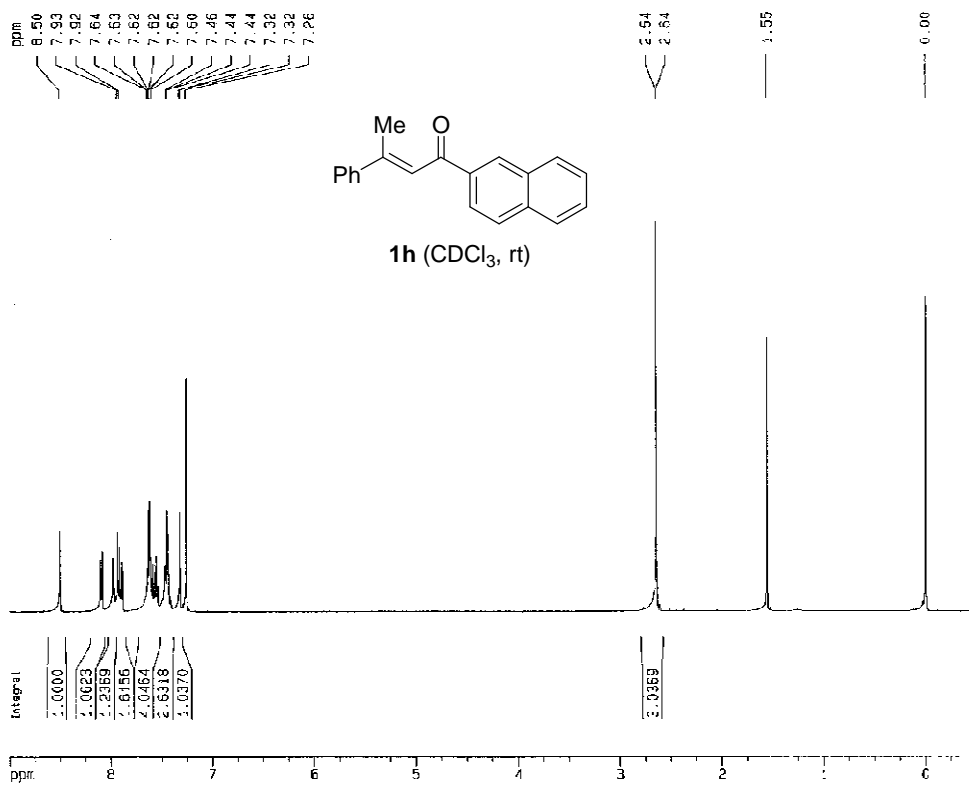

Current Data Parameters  
 NAME Cub62 1 A  
 EXPRO :  
 PROPR 2

F2 Acquisition Parameters  
 Date\_ 20101109  
 Time 15.24  
 INSTRUM spect  
 PROBR 5 mm QNP 3H  
 PULPROG zg  
 TD 49376  
 SOLVENT CDCl3  
 NS 8  
 DS 0  
 SWH 6042.320 Hz  
 FIDRES 0.165570 Hz  
 AQ 2.9999924 sec  
 RG 768  
 DW 62.400 usec  
 DE 4.50 usec  
 TE 302.0 K  
 D3 3.0000000 sec

===== CHANNEL 11 =====  
 NUC1 1H  
 P1 9.00 usec  
 PL1 0.00 dB  
 SFO1 500.1325300 MHz

F2 - Processing parameters  
 SI 65336  
 SF 500.1300435 MHz  
 RGW EM  
 SSB 0  
 LB 0.30 Hz  
 GB 0  
 PC 1.00

1D NMR plot parameters  
 CX 20.00 cm  
 F1 4.000 NCT  
 F1 4501.17 Hz  
 F2 -0.500 ppm  
 F2 -250.07 Hz  
 PPRCH 0.47500 ppm/cm  
 HZCH 237.56175 Hz/cm

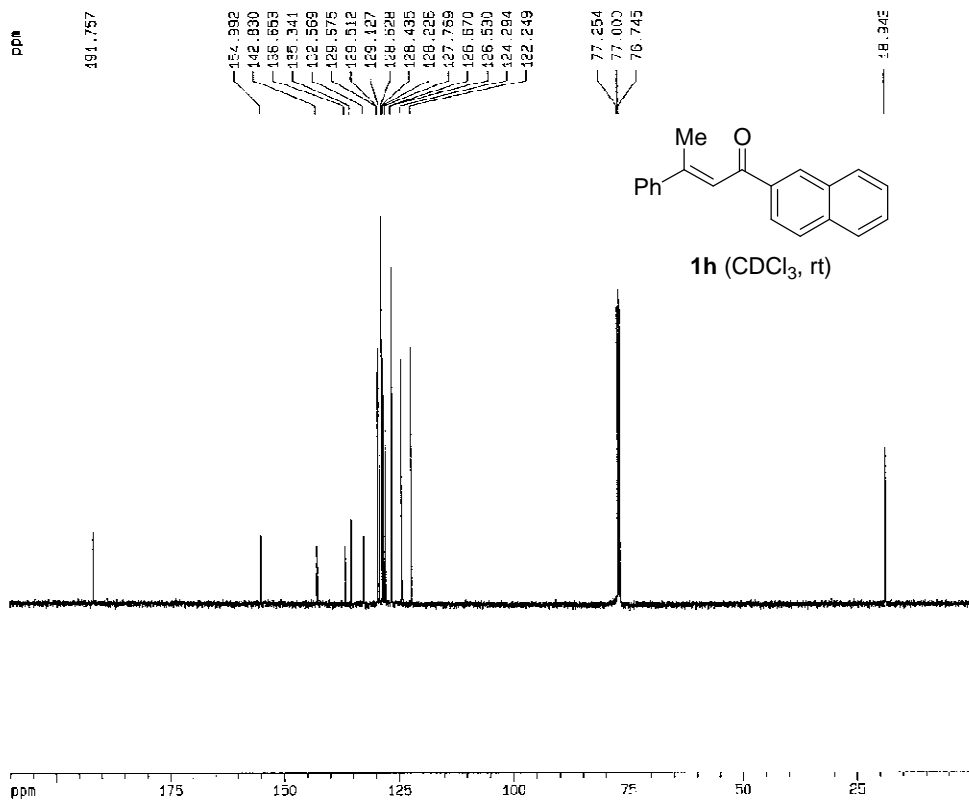

Current Data Parameters  
 NAME Sub62-1-A-00M  
 EXPRO 1  
 PROPR 2

F2 Acquisition Parameters  
 Date\_ 20101109  
 Time 16.43  
 INSTRUM spect  
 PROBR 5 mm QNP 1H  
 PULPROG zgpg30  
 TD 112760  
 SOLVENT CDCl3  
 NS 240  
 DS 0  
 SWH 12721.584 Hz  
 FIDRES 0.33330 Hz  
 AQ 1.5000000 sec  
 RG 8160  
 DW 13.300 usec  
 DE 7.50 usec  
 TE 300.0 K  
 D1 4.0000000 sec  
 D11 0.0000000 sec

===== CHANNEL 11 =====  
 NUC1 13C  
 P1 4.00 usec  
 PL1 3.00 dB  
 SFO1 125.7611008 MHz

===== CHANNEL 12 =====  
 NUC2 1H  
 P2 9.00 usec  
 PL2 120.00 dB  
 SFO2 500.1338000 MHz

F2 - Processing parameters  
 SI 32768  
 SF 125.7577950 MHz  
 RGW EM  
 SSB 0  
 LB 1.00 Hz  
 GB 0  
 PC 1.40

1D NMR plot parameters  
 CX 20.00 cm  
 F1 4.000 ppm  
 F1 24004.13 Hz  
 F2 -1.000 ppm  
 F2 -120.75 Hz  
 PPRCH 11.50000 ppm/cm  
 HZCH 1320.74403 Hz/cm

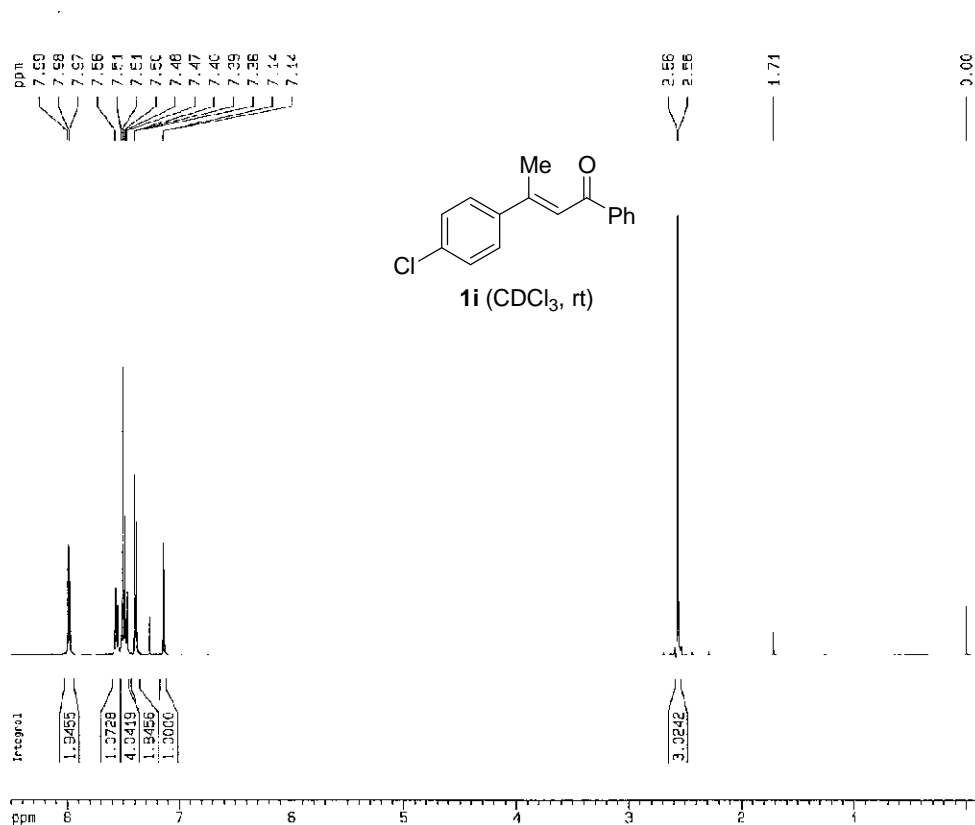

Current Data Parameters  
NAME Sub36-1-A-BCM  
EXPNO 1  
PROCNO 2

F2 - Acquisition Parameters  
Date\_ 20101219  
Time 17.29  
INSTRUM spect  
PROBHD 5 mm GNP 1H  
PULPROG zg  
TD 48176  
SOLVENT CDCl3  
NS 8  
DS 0  
SWH 8012.820 Hz  
FIDRES 0.166679 Hz  
AQ 2.559924 sec  
RG 128  
LW 62.400 usec  
DE 4.50 usec  
TE 300.0 K  
D1 3.000000 sec

----- CHANNEL f1 -----  
NUC1 1H  
P1 9.00 usec  
PL1 0.00 dB  
SFO1 500.132035 MHz

F2 - Processing parameters  
SI 65535  
SF 500.1300111 MHz  
WDW EM  
SS1 0  
LR 0.33 Hz  
GB 0  
PC 1.00

1D NMR plot parameters  
GX 20.00 cm  
FAP 0.500 ppm  
F1 4251.13 Hz  
F2 -1.000 ppm  
F3 -50.31 Hz  
PPMCM 0.43013 ppm/cm  
HZCM 215.06591 Hz/cm

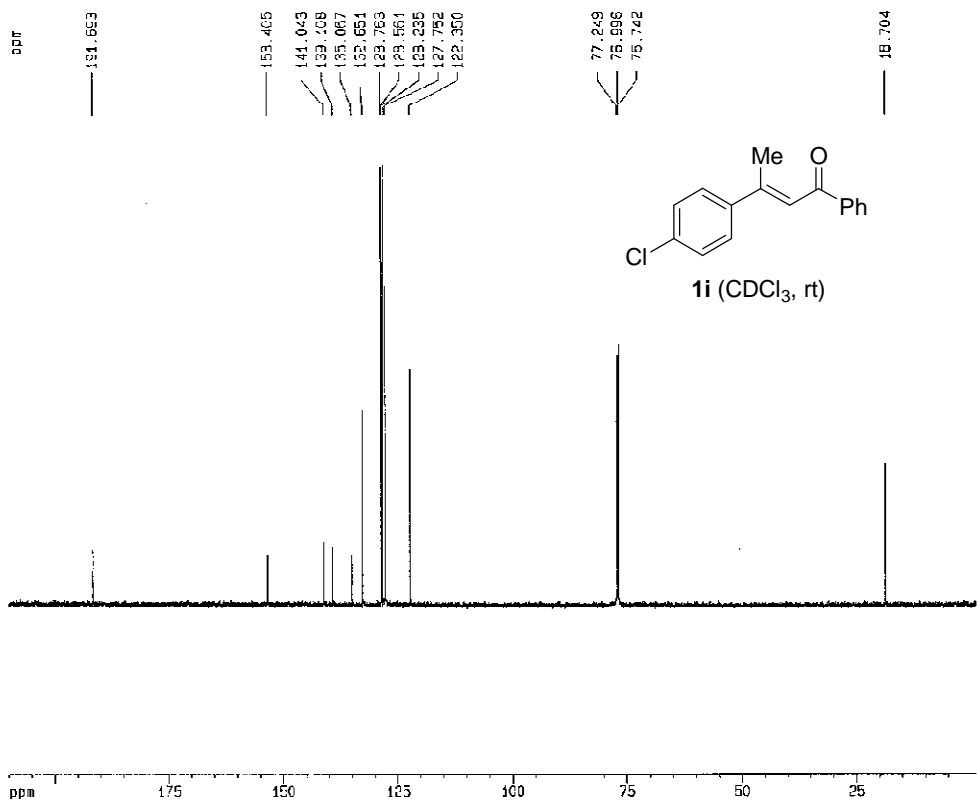

Current Data Parameters  
NAME Sub36-1-A-BCM  
EXPNO 1  
PROCNO 2

F2 - Acquisition Parameters  
Date\_ 20101219  
Time 19.09  
INSTRUM spect  
PROBHD 5 mm GNP 1H  
PULPROG zgpg  
TD 112780  
SOLVENT CDCl3  
NS 240  
DS 0  
SWH 37093.384 Hz  
FIDRES 0.533339 Hz  
AQ 1.5002240 sec  
RG 6192  
LW 17.700 usec  
DE 7.50 usec  
TE 300.0 K  
D1 4.0000000 sec  
d11 0.0300000 sec

----- CHANNEL f1 -----  
NUC1 13C  
P1 6.00 usec  
PL1 0.00 dB  
SFO1 125.7671700 MHz

----- CHANNEL f2 -----  
CPROG2 waltz16  
NUC2 1H  
PCPRG2 90.00 usec  
PL2 120.00 dB  
PL12 20.00 dB  
SFO2 500.1330000 MHz

F2 - Processing parameters  
SI 32788  
SF 125.7577951 MHz  
HOM EM  
SFB 0  
LB 1.00 Hz  
GB 0  
PC 1.40

1D NMR plot parameters  
GX 20.00 cm  
F1P 210.000 ppm  
F1 26409.13 Hz  
F2 -1.000 ppm  
F3 -25.70 Hz  
PPMCM 10.55009 ppm/cm  
HZCM 1360.74403 Hz/cm



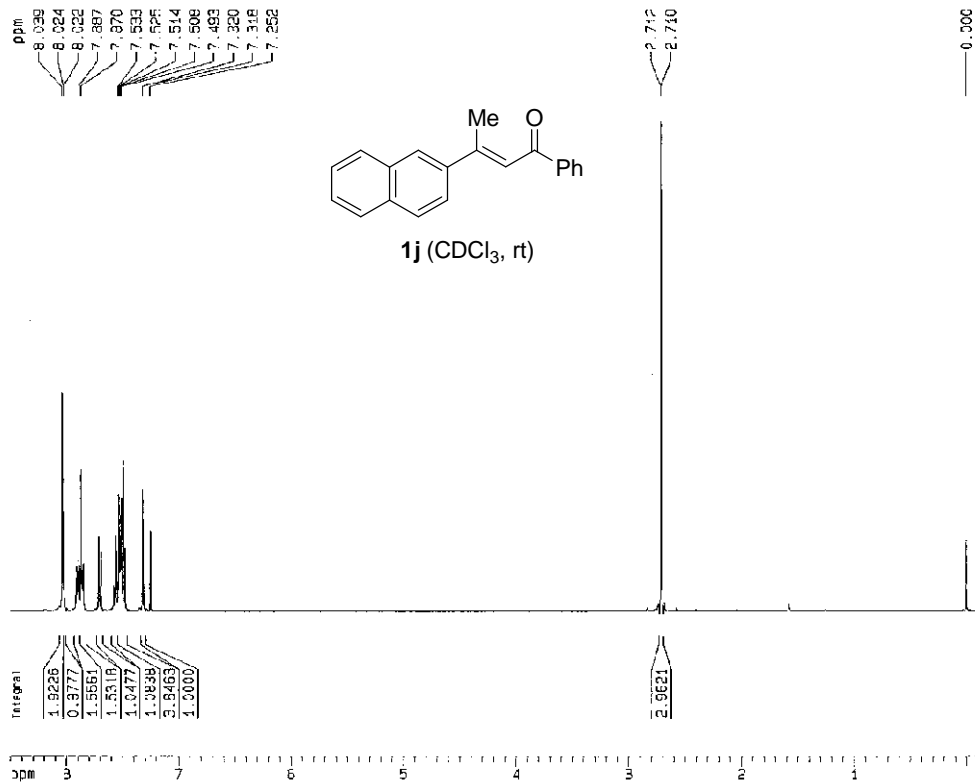

Current Data Parameters  
 NAME Sub97-1-A  
 EXPRO 1  
 PROCNO 2

F2 - Acquisition Parameters  
 Date\_ 20101214  
 Time 1.10  
 INSTRUM spect  
 PROBRD 5 mm QNP 1H  
 PULPROG zgpg30  
 TD 65536  
 SOVENT CDCl3  
 NS 8  
 DS 0  
 SWH 8012.020 Hz  
 FIDRES 0.166670 Hz  
 AQ 2.9599924 sec  
 RG 128  
 DW 62.400 usec  
 DE 4.50 usec  
 TE 300.0 K  
 D1 3.0000000 sec

===== CHANNEL f1 =====  
 NUC1 1H  
 P1 9.00 usec  
 PL1 0.00 dB  
 SFO1 500.136006 MHz

F2 - Processing parameters  
 SI 65536  
 SF 500.1360177 MHz  
 WDW EM  
 SSB 0  
 LB 0.30 Hz  
 GB 0  
 PC 1.00

1D NMR plot parameters  
 CX 20.00 cm  
 F1P 4.500 ppm  
 F1 4264.10 Hz  
 F2P 0.100 ppm  
 F2 -50.01 Hz  
 FWHM 0.42000 ppm/cm  
 HZCM 215.03281 Hz/cm

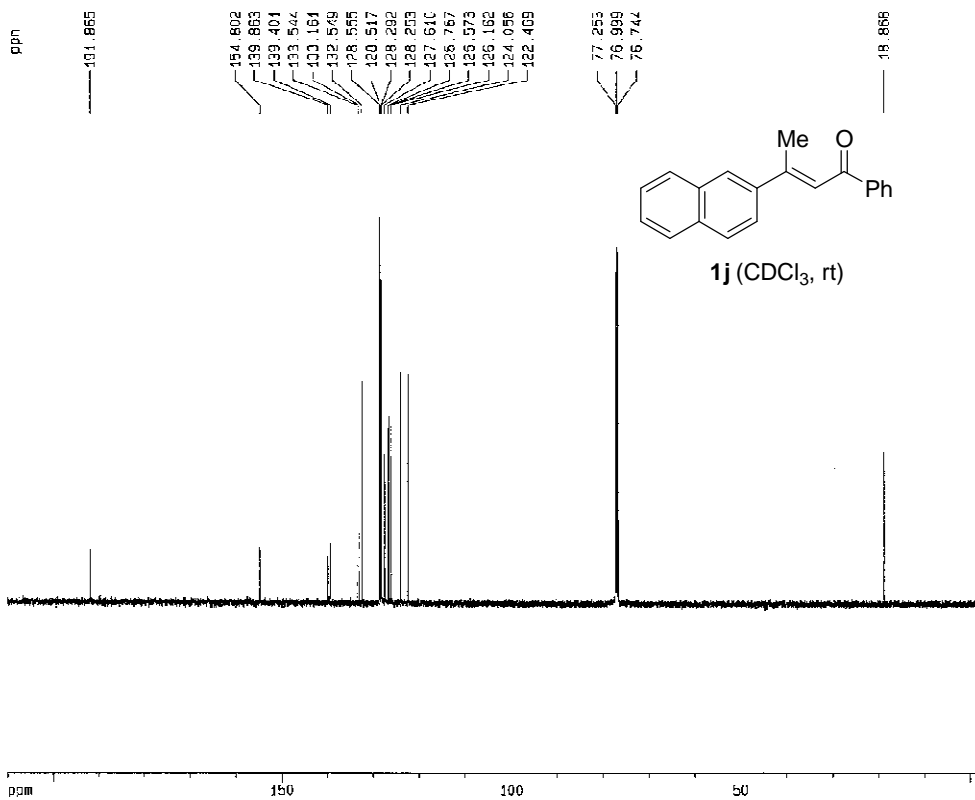

Current Data Parameters  
 NAME Sub97-1-A-BC4  
 EX-NU 1  
 PROCNO 2

F2 - Acquisition Parameters  
 Date\_ 20101215  
 Time 16.42  
 INSTRUM spect  
 PROBRD 5 mm QNP 1H  
 PULPROG zgpg30  
 TD 65536  
 SOVENT CDCl3  
 NS 3  
 DS 0  
 SWH 37893.984 Hz  
 FIDRES 0.333333 Hz  
 AQ 1.5000243 sec  
 RG 640  
 DW 13.300 usec  
 DE 2.50 usec  
 TE 300.3 K  
 D1 4.6000000 sec  
 d11 0.0300000 sec

----- CHANNEL f1 -----  
 NUC1 13C  
 P1 8.00 usec  
 PL1 0.00 dB  
 SFO1 125.7613708 MHz

----- CHANNEL f2 -----  
 EXPFRG2 wa1216  
 NUC2 1H  
 FREQ2 90.00 MHz  
 PL2 120.00 dB  
 PL12 00.00 dB  
 SFO2 500.136000 MHz

F2 - Processing parameters  
 SI 32768  
 SF 125.7613750 MHz  
 WDW FK  
 SSB 0  
 LB 1.00 Hz  
 GB 0  
 PC 1.40

1D NMR plot parameters  
 CX 20.00 cm  
 F1P 219.000 ppm  
 F1 26409.13 Hz  
 F2P 1.000 ppm  
 F2 -125.76 Hz  
 FWHM 10.55000 ppm/cm  
 HZCM 1326.74463 Hz/cm

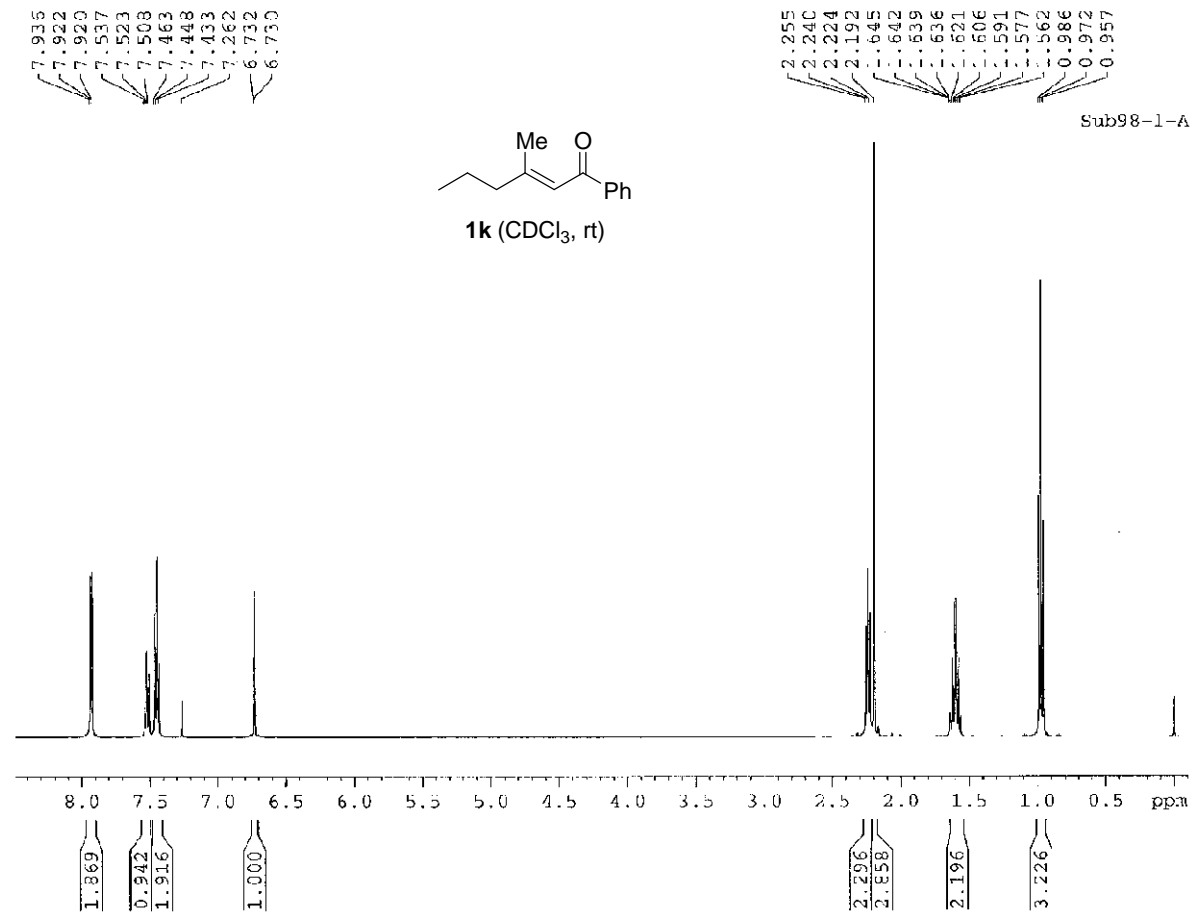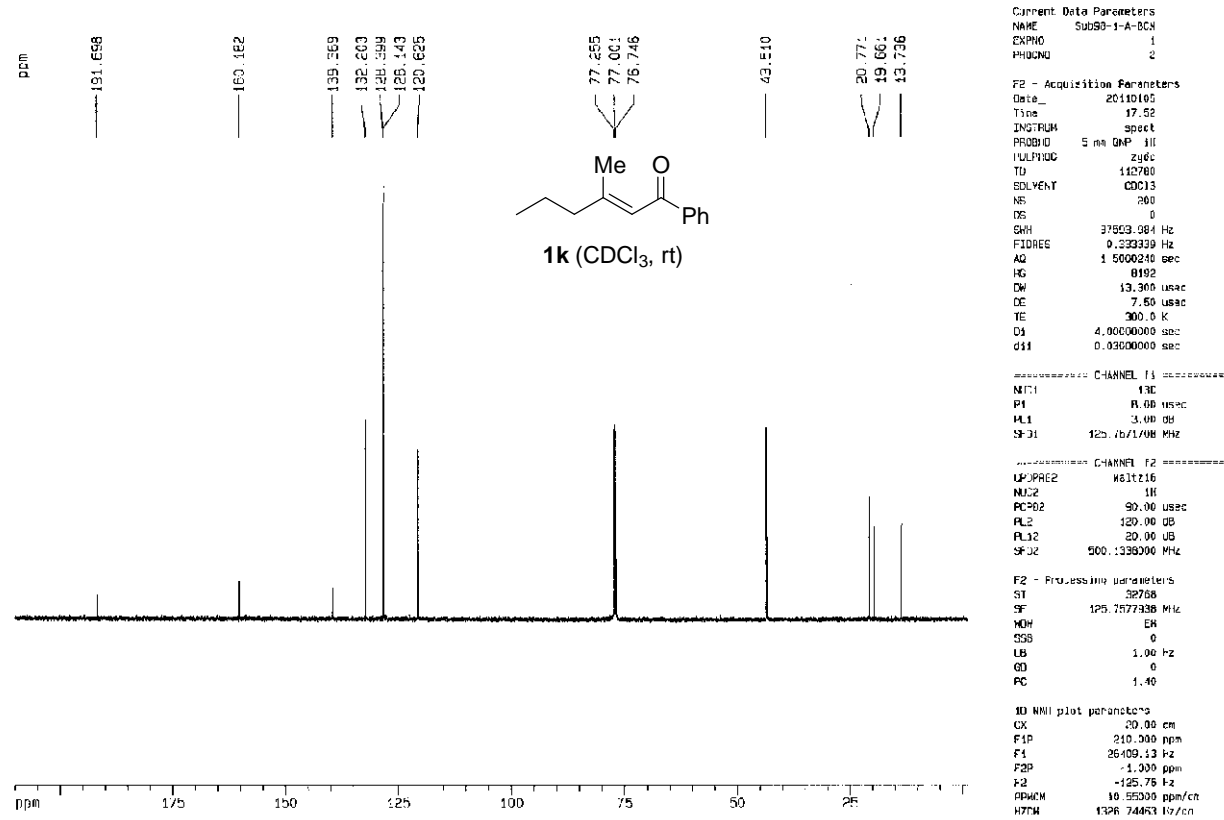

Current Data Parameters

NAME Sub98-1-A-BCN

EXPNO 1

PROCNO 2

F2 - Acquisition Parameters

Date\_ 20110105

Time 17.52

INSTRUM spect

PROBHD 5 mm QNP 1H

PULPROG zgpg

TD 112760

SOLVENT CDCl3

NS 260

DS 0

SWH 37803.084 Hz

FIDRES 0.333339 Hz

AQ 1.5000240 sec

HG 0192

DM 13.368 usec

DE 7.65 usec

TE 300.2 K

TC 200.5 K

D1 4.0000000 sec

d11 0.0300000 sec

===== CHANNEL f1 =====

NUC1 13C

P1 14.00 usec

PL1 3.00 dB

SF1 125.761100 MHz

===== CHANNEL f2 =====

UPPREZ 4611216

NUC2 1H

PCPD2 90.00 usec

PL2 120.00 dB

PL12 20.00 dB

SF12 500.136000 MHz

F2 - Processing parameters

SI 32768

SF 125.7577338 MHz

WDW EM

SSB 0

LB 1.00 Hz

GB 0

PC 1.40

F0 NMR1 plot parameters

CX 20.00 cm

F1P 210.300 ppm

F1 26409.13 Hz

F2P 1.300 ppm

F2 -125.76 Hz

PRNOM 10.55030 ppm/cm

HZFM 1326.74463 Hz/cm

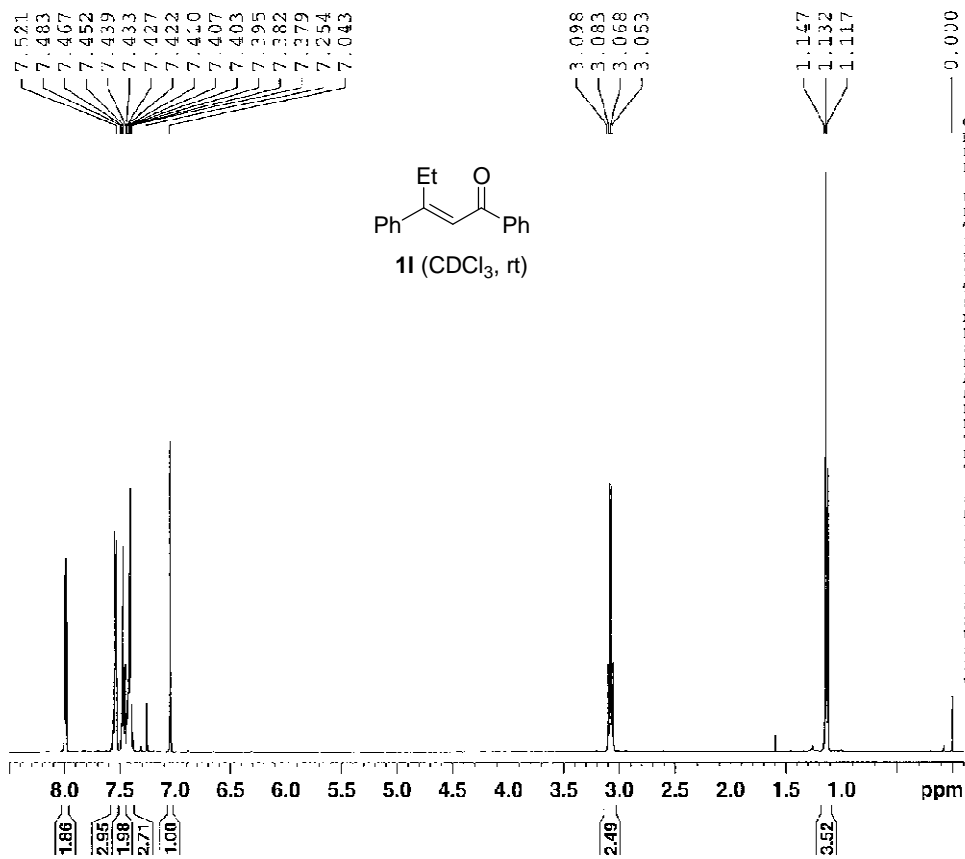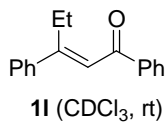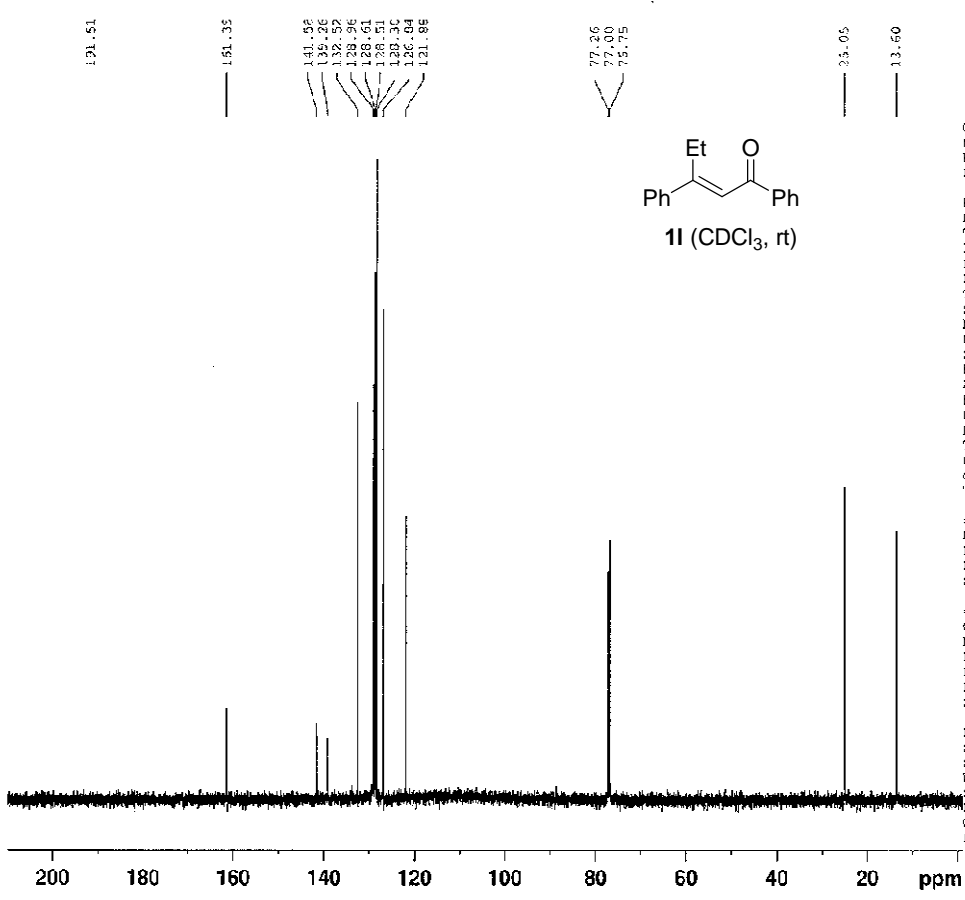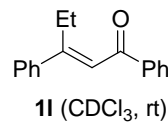

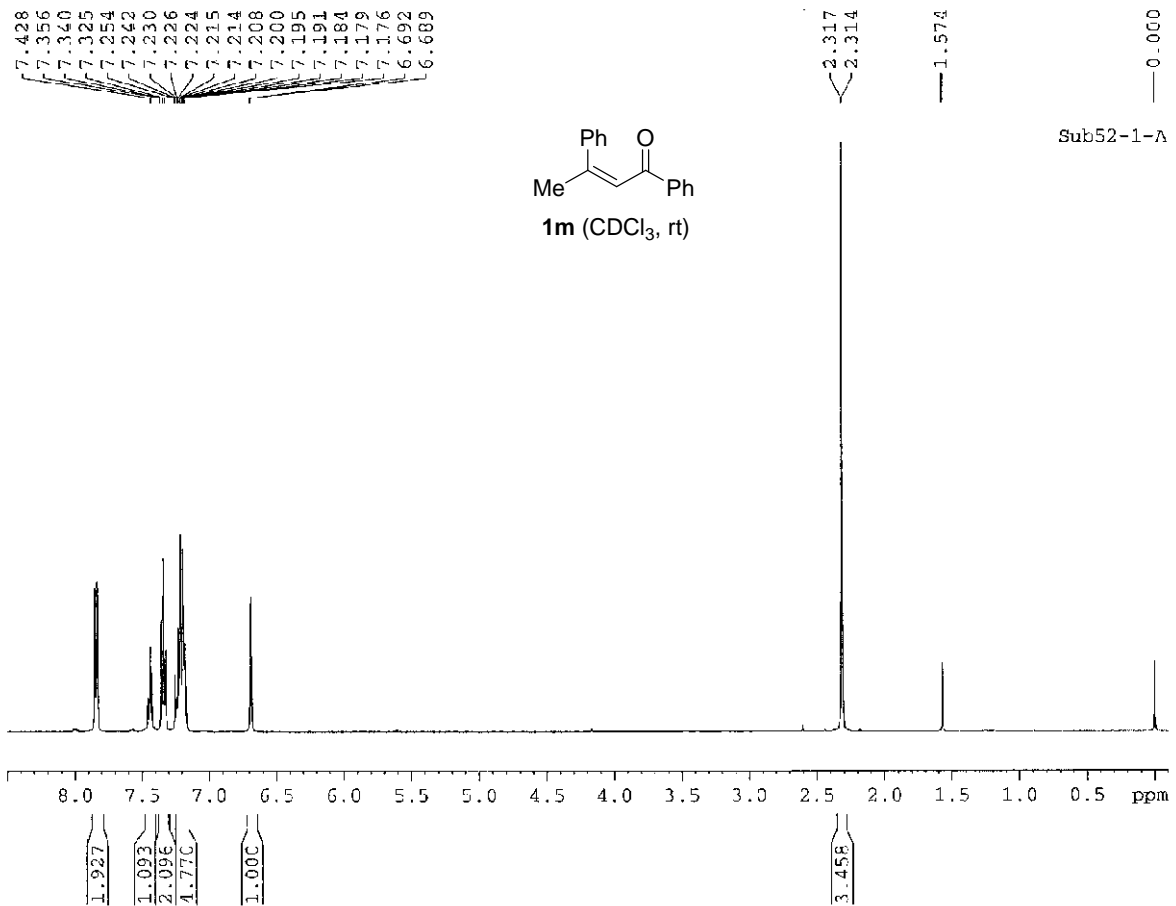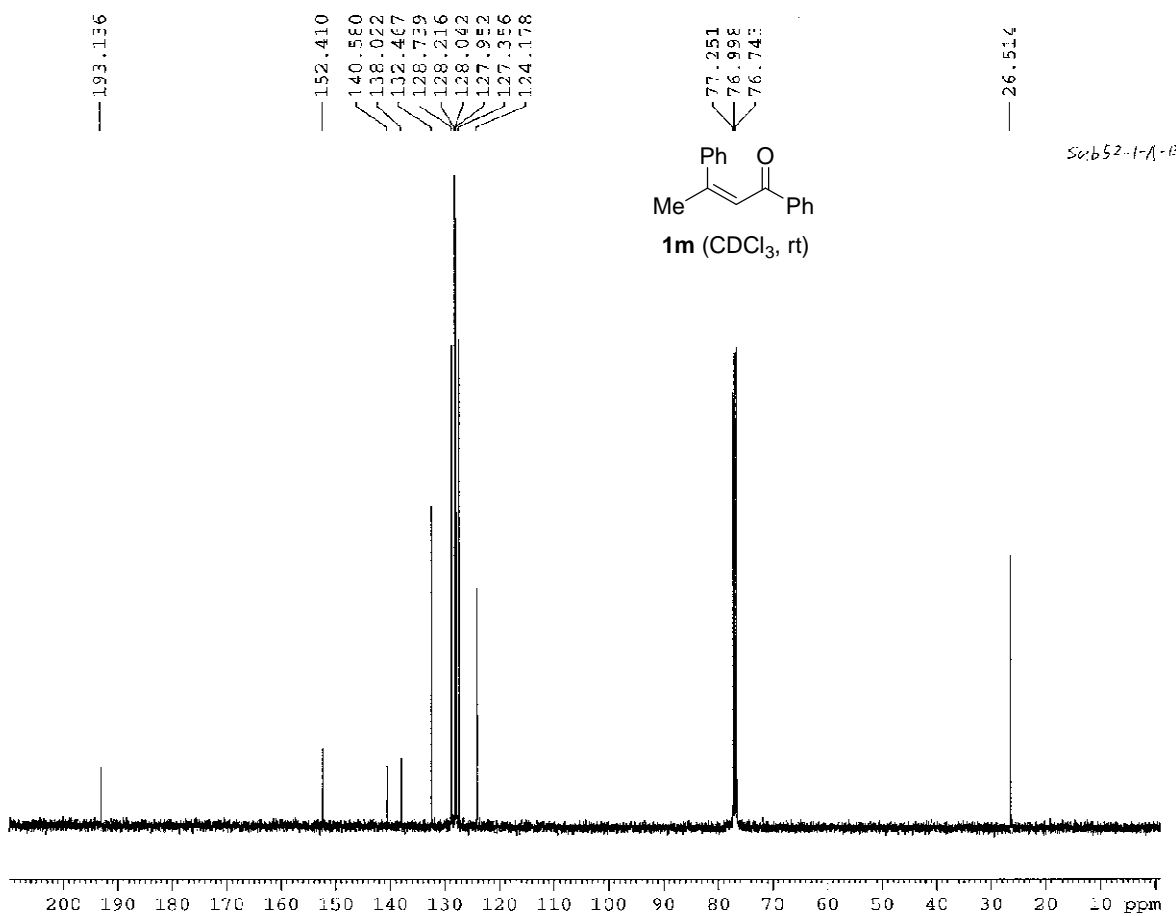

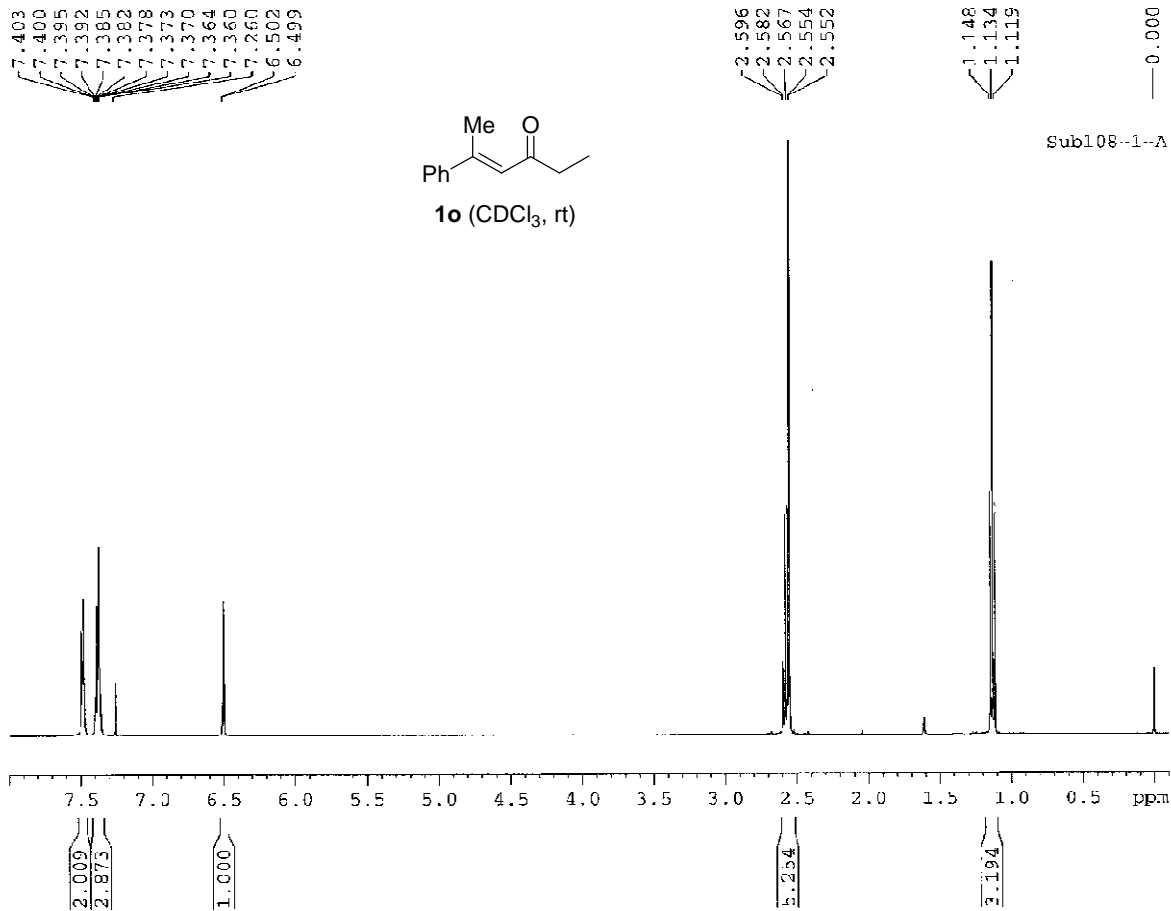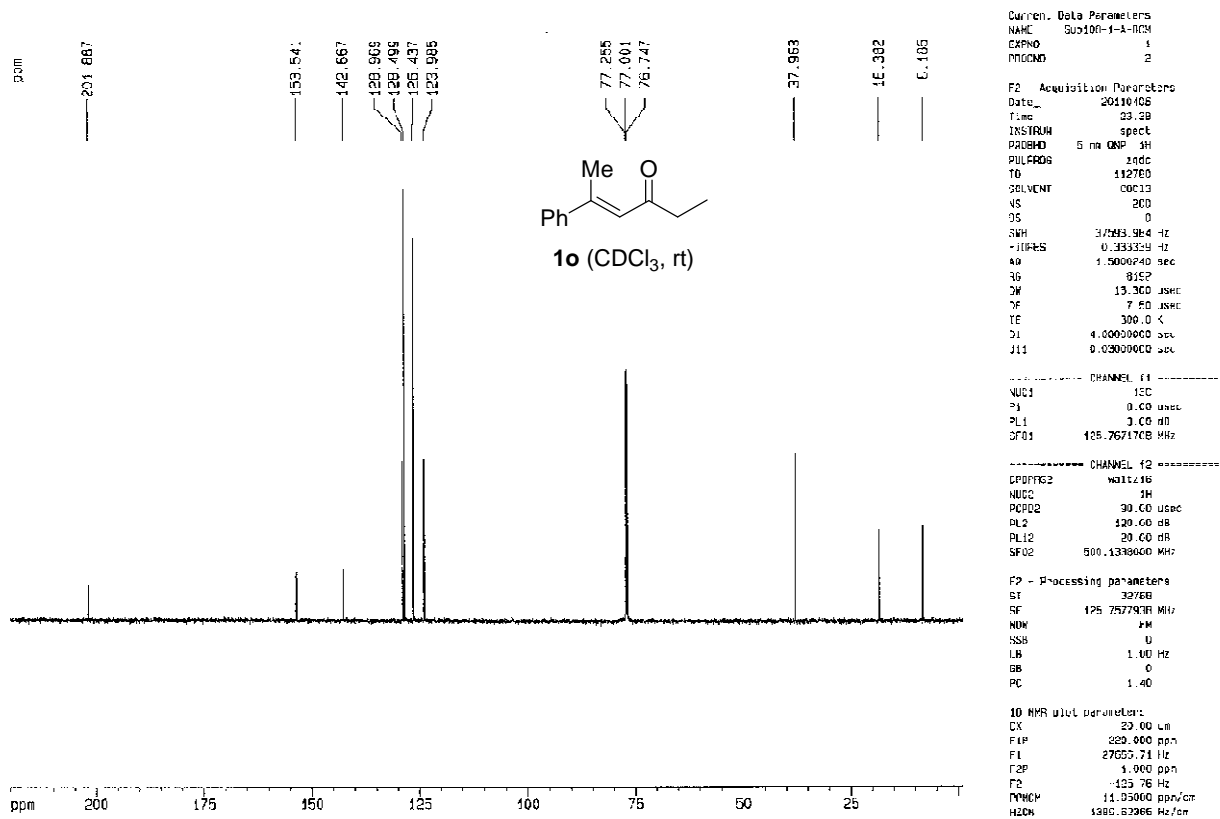

7.496  
7.484  
7.448  
7.433  
7.418  
7.388  
7.378  
7.373  
7.369  
7.361  
7.359

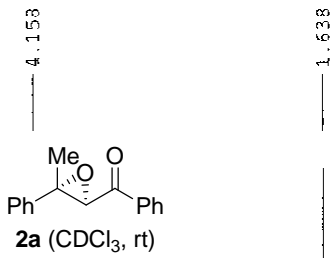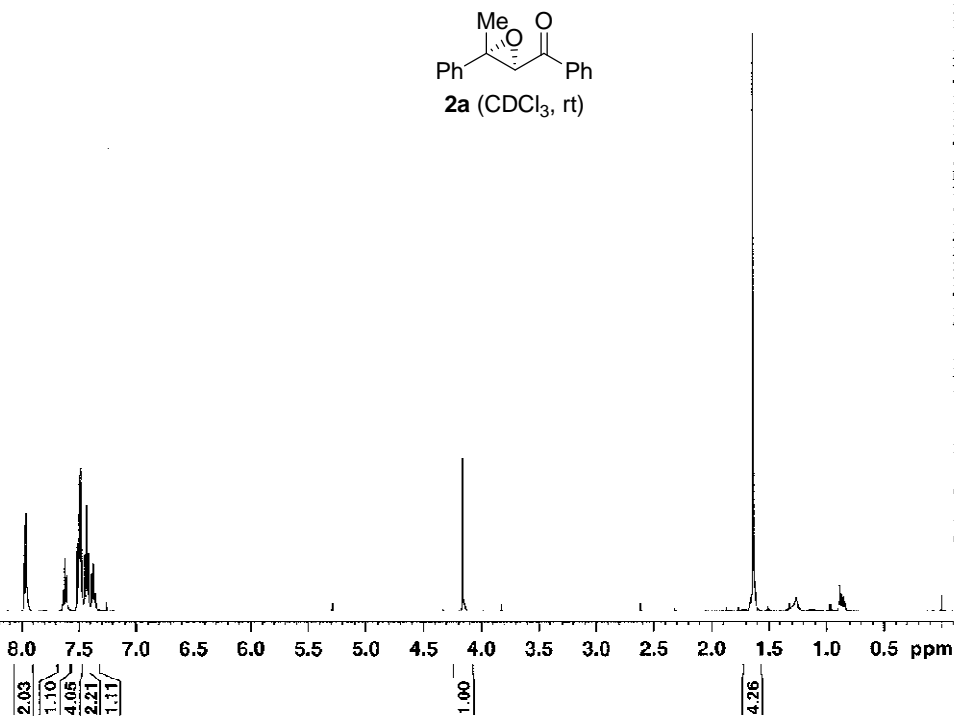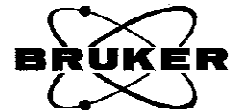

Current Data Parameters  
NAME BIP27-3-A1  
EXPNO 1  
PROCNO 1

F2 - Acquisition Parameters  
Date 20100926  
Time 13.11  
INSTRUM spect  
PROBHD 5 mm PABBI 1H/  
PULPROG zg  
TD 59298  
SOLVENT CDCl3  
NS 8  
DS 0  
SWH 10000.360 Hz  
FIDRES 0.166872 Hz  
AQ 2.9999499 sec  
RG 32  
DW 50.000 usec  
DE 7.50 usec  
TE 295.2 K  
D1 1.0000000 sec  
TD0 1

===== CHANNEL f1 =====  
NUC1 1H  
P1 5.35 usec  
PL1 0.00 dB  
SFO1 499.8729992 MHz

F2 - Processing parameters  
SI 32768  
SF 499.8700182 MHz  
WDW EM  
SSB 0  
LB 0.30 Hz  
GB 0  
PC 1.00

192.98

140.40  
135.57  
133.96  
128.93  
128.75  
128.23  
125.11

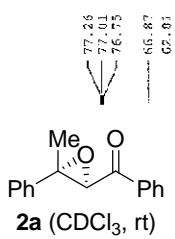

65.87  
62.01

16.94

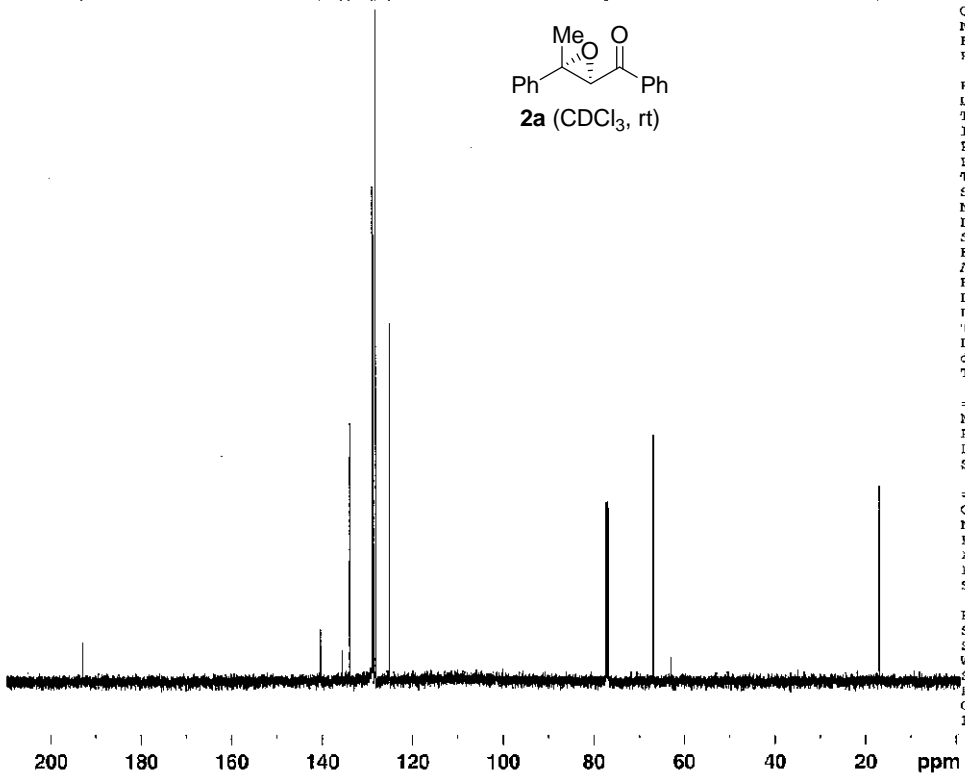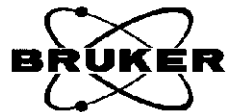

Current Data Parameters  
NAME BIP27-3-A2-BCM  
EXPNO 1  
PROCNO 1

F2 - Acquisition Parameters  
Date 20100927  
Time 23.49  
INSTRUM spect  
PROBHD 5 mm PABBI 1H/  
PULPROG zgdc  
TD 126366  
SOLVENT CDCl3  
NS 200  
DS 0  
SWH 37593.984 Hz  
FIDRES 0.275697 Hz  
AQ 1.8126380 sec  
RG 11585.2  
DW 12.300 usec  
DE 7.50 usec  
TE 300.0 K  
D1 2.0000000 sec  
d11 0.0000000 sec  
TD0 1

===== CHANNEL f1 =====  
NUC1 13C  
P1 12.00 usec  
PL1 3.00 dB  
SFO1 125.7024564 MHz

===== CHANNEL f2 =====  
CPDPRG2 waltz16  
NUC2 1H  
PCPD2 90.00 usec  
PL2 0.00 dB  
PL12 28.00 dB  
SFO2 499.8734991 MHz

F2 - Processing parameters  
SI 32768  
SF 125.6924183 MHz  
WDW EM  
SSB 0  
LB 1.00 Hz  
GB 0  
PC 1.40

# Chiral HPLC analysis of compound **2a**

*rac-2a*

Data File: c:\star\1-6-11 5:05:55 pm -1.run      Run Mode: Analysis  
 Sample ID: BIP27-rac 254nm      Peak Measurement: Peak Area  
 Operator (Inj): AS-H PrOH/Hex 5/95 FR1.0      Calibration Level: N/A  
 Injection Date: 01/06/11 05:05:55 PM      Run Time (min): 42.747

Injection Method: c:\star\yasuhiro\temporal.y.mth

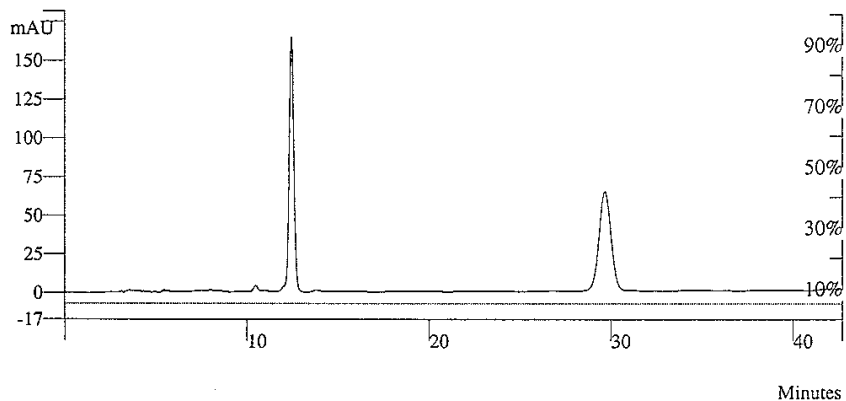

| Peak No | Result () | Ret Time (min)  | Time Offset (min) | Peak Area (counts) | Rel Ret Time | Sep. Code | Width 1/2 (sec) |
|---------|-----------|-----------------|-------------------|--------------------|--------------|-----------|-----------------|
| 1       | 50.1862   | 12.440          | 0.000             | 15054974           | 0.00         | BB        | 16.2            |
| 2       | 49.8138   | 29.640          | 0.000             | 14943252           | 0.00         | BB        | 42.3            |
|         |           | <b>100.0000</b> | <b>0.000</b>      | <b>29998226</b>    |              |           |                 |

chiral **2a**

Data File: c:\star\1-8-11 7:16:47 pm -1.run      Run Mode: Analysis  
 Sample ID: BIP27-27-A 254nm      Peak Measurement: Peak Area  
 Operator (Inj):      Calibration Level: N/A  
 Injection Date: 01/08/11 07:16:47 PM      Run Time (min): 33.093

Injection Method: c:\star\yasuhiro\temporal.y.mth

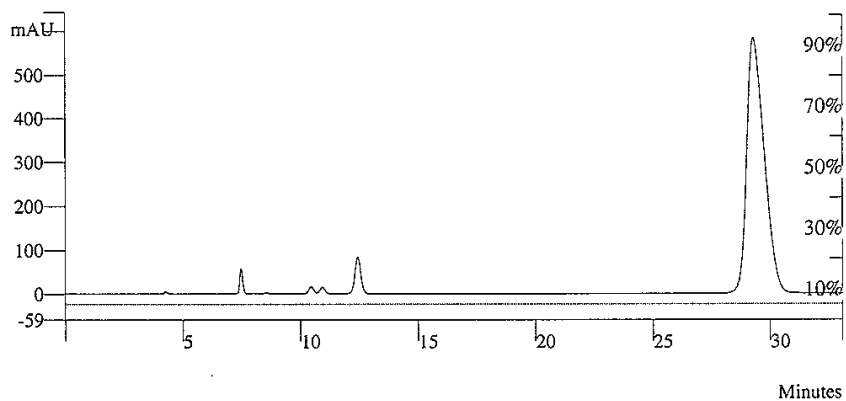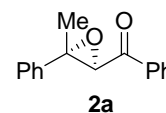

| Peak No | Result () | Ret Time (min)  | Time Offset (min) | Peak Area (counts) | Rel Ret Time | Sep. Code | Width 1/2 (sec) |
|---------|-----------|-----------------|-------------------|--------------------|--------------|-----------|-----------------|
| 1       | 4.4650    | 12.413          | 0.000             | 7346354            | 0.00         | BB        | 15.9            |
| 2       | 95.5350   | 29.267          | 0.000             | 157187232          | 0.00         | BB        | 49.2            |
|         |           | <b>100.0000</b> | <b>0.000</b>      | <b>164533584</b>   |              |           |                 |

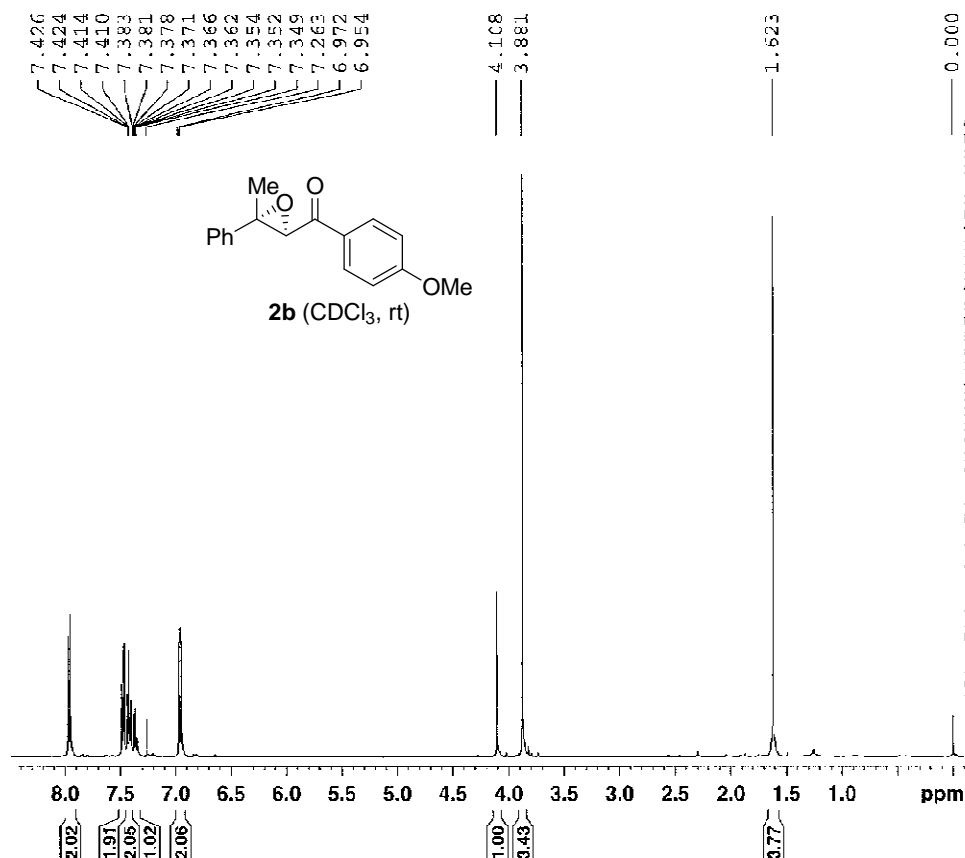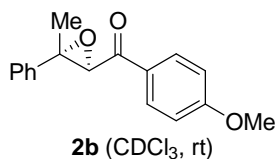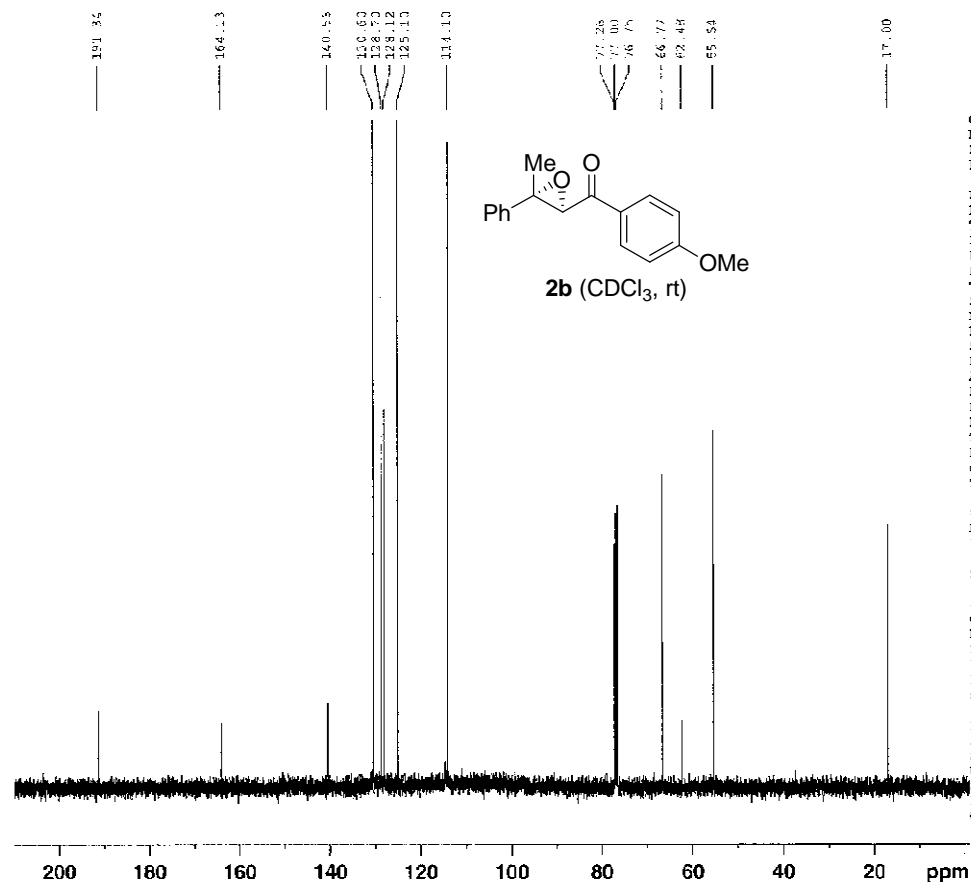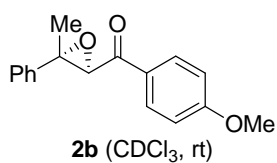



Chiral HPLC analysis of compound **2b**

*rac-2b*

Data File: c:\star\11-10-10 10:30:23 pm -1.run Run Mode: Analysis  
 Sample ID: BIP68-rac 254nm Peak Measurement: Peak Area  
 Operator (Inj): AS-H PrOH/Hex 10/90 FR1.0 Calibration Level: N/A  
 Injection Date: 11/10/10 10:30:23 PM Run Time (min): 73.547

Injection Method: c:\star\yasuhiro\temporal.y.mth

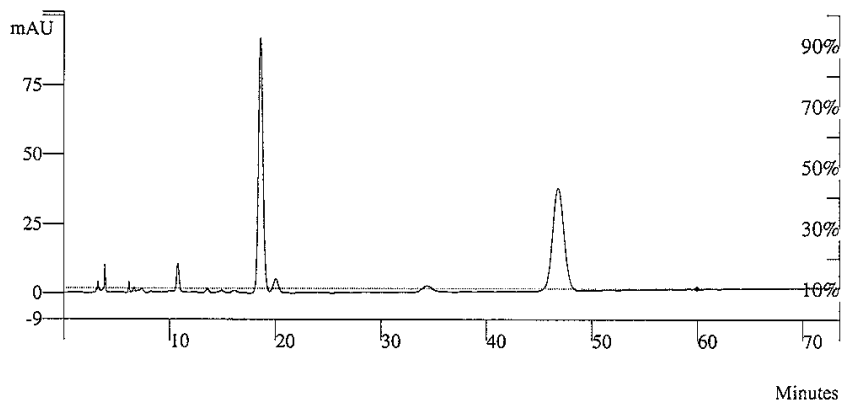

| Peak No | Result () | Ret Time (min)  | Time Offset (min) | Peak Area (counts) | Rel Ret Time | Sep. Code | Width 1/2 (sec) |
|---------|-----------|-----------------|-------------------|--------------------|--------------|-----------|-----------------|
| 1       | 48.8328   | 18.600          | 0.000             | 13537579           | 0.00         | BB        | 27.8            |
| 2       | 51.1672   | 46.787          | 0.000             | 14184718           | 0.00         | BB        | 70.3            |
|         |           | <b>100.0000</b> | <b>0.000</b>      | <b>27722296</b>    |              |           |                 |

chiral **2b**

Data File: c:\star\11-11-10 4:50:20 pm -1.run Run Mode: Analysis  
 Sample ID: BIP68-2-A 254nm Peak Measurement: Peak Area  
 Operator (Inj): Injection Date: 11/11/10 04:50:20 PM Calibration Level: N/A  
 Run Time (min): 61.280

Injection Method: c:\star\yasuhiro\temporal.y.mth

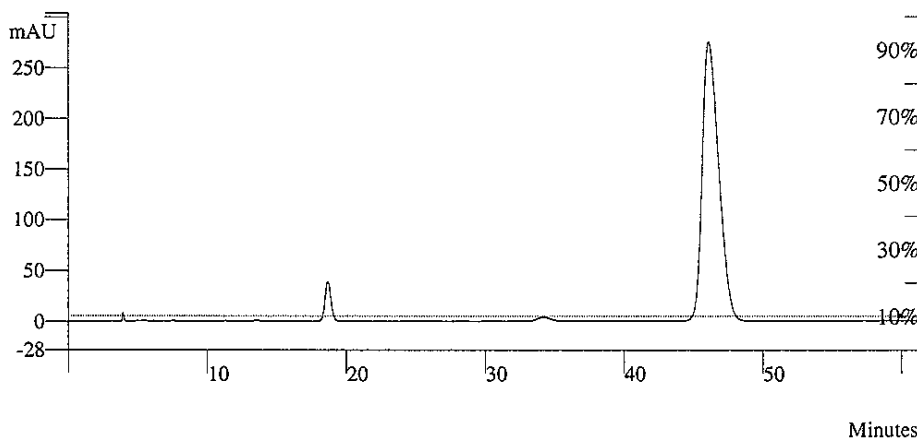

| Peak No | Result () | Ret Time (min)  | Time Offset (min) | Peak Area (counts) | Rel Ret Time | Sep. Code | Width 1/2 (sec) |
|---------|-----------|-----------------|-------------------|--------------------|--------------|-----------|-----------------|
| 1       | 4.8213    | 18.653          | 0.000             | 5893033            | 0.00         | BB        | 27.5            |
| 2       | 95.1787   | 46.093          | 0.000             | 116335656          | 0.00         | BB        | 77.5            |
|         |           | <b>100.0000</b> | <b>0.000</b>      | <b>122228688</b>   |              |           |                 |

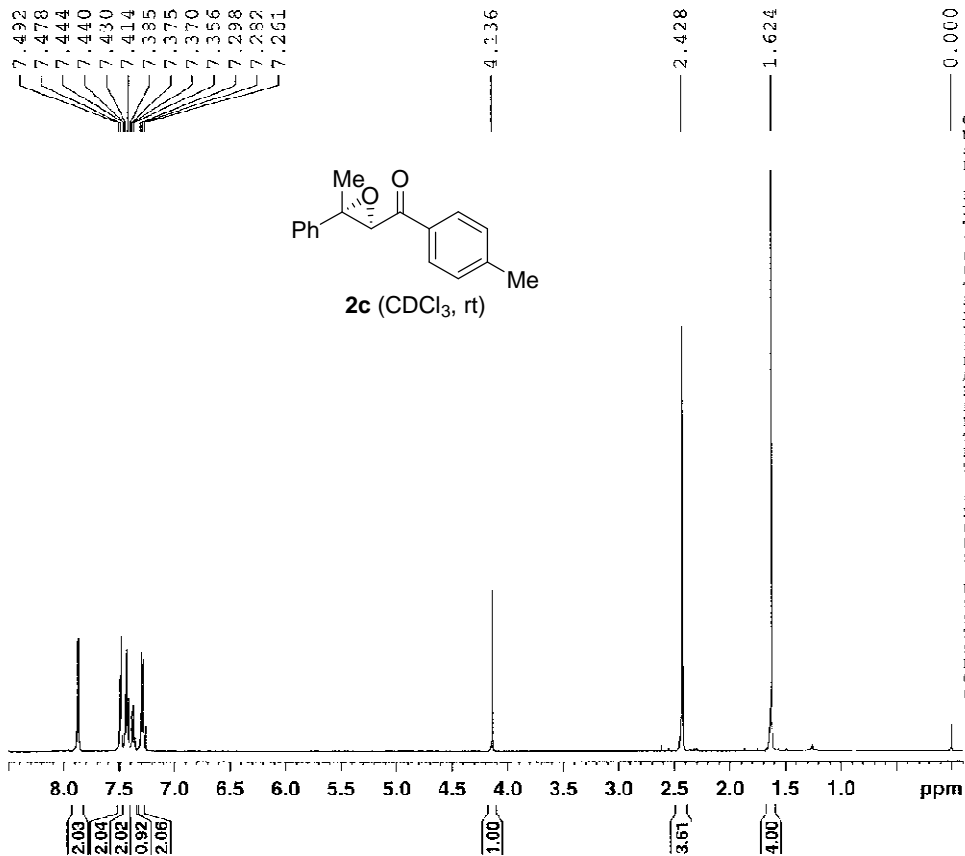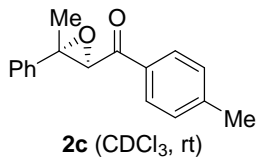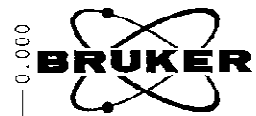

Current Data Parameters  
 NAME BIP69-2-A  
 EXPNO 1  
 PROCNO 1

F2 - Acquisition Parameters  
 Date\_ 20110114  
 Time 17.25  
 INSTRUM spect  
 PROBHD 5 mm PABBI 1H/  
 PULPROG zg  
 TD 59996  
 SOLVENT CDCl3  
 NS 4  
 DS 0  
 SWH 10000.000 Hz  
 FIDRES 0.166672 Hz  
 AQ 2.999499 sec  
 RG 45.3  
 DW 50.000 msec  
 DE 7.50 usec  
 TE 294.9 K  
 D1 1.0000000 sec  
 TDO 1

===== CHANNEL f1 =====  
 NUC1 1H  
 P1 5.35 usec  
 PL1 0.00 dB  
 SFO1 499.8729992 MHz

F2 - Processing parameters  
 SI 32768  
 SF 499.8700172 MHz  
 WDW EM  
 SSB 0  
 LB 0.30 Hz  
 GB 0  
 PC 1.00

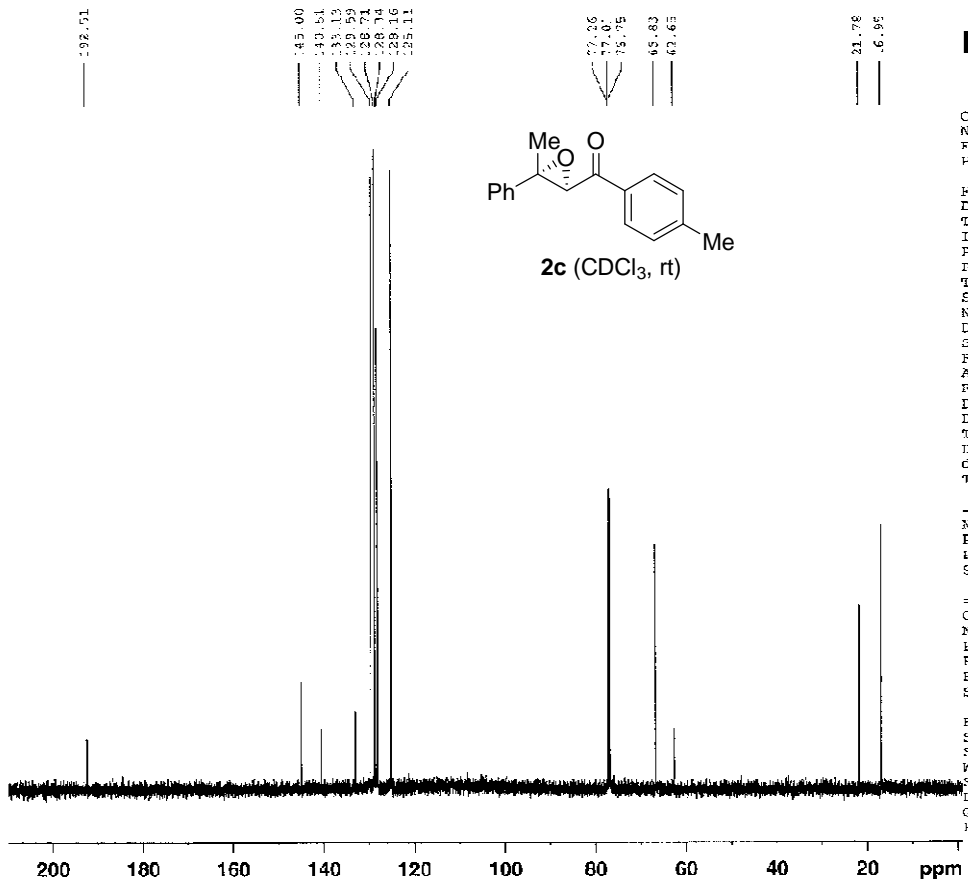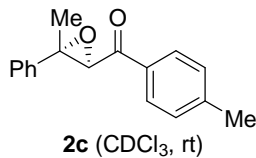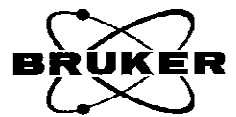

Current Data Parameters  
 NAME BIP69-2-A-BCM  
 EXPNO 1  
 PROCNO 1

F2 - Acquisition Parameters  
 Date\_ 20110114  
 Time 18.48  
 INSTRUM spect  
 PROBHD 5 mm PABBI 1H/  
 PULPROG zgpg30  
 TD 136360  
 SOLVENT CDCl3  
 NS 200  
 DS 0  
 SWH 37533.984 Hz  
 FIDRES 0.275697 Hz  
 AQ 1.8136380 sec  
 RG 13350.4  
 DW 13.300 usec  
 DE 7.50 usec  
 TE 295.1 K  
 D1 2.0030000 sec  
 d11 0.0330000 sec  
 TDO 1

===== CHANNEL F1 =====  
 NUC1 13C  
 P1 12.00 usec  
 PL1 -3.00 dB  
 SFO1 125.7024654 MHz

===== CHANNEL F2 =====  
 CPDPRG2 waltz16  
 NUC2 1H  
 PCPD2 90.00 usec  
 PL2 0.00 dB  
 EL12 28.00 dB  
 SFO2 499.8734991 MHz

F2 - Processing parameters  
 SI 32768  
 SF 125.6924192 MHz  
 WDW EM  
 SSB 0  
 LB 1.00 Hz  
 GB 0  
 PC 1.40

Chiral HPLC analysis of compound **2c**

*rac-2c*

Data File: c:\star\11-10-10 1:53:24 pm -1.run Run Mode: Analysis  
 Sample ID: BIP69-rac 254nm Peak Measurement: Peak Area  
 Operator (Inj): AS-H PrOH/Hex 5/95 FR1.0 Calibration Level: N/A  
 Injection Date: 11/10/10 01:53:24 PM Run Time (min): 52.667

Injection Method: c:\star\yasuhiro\temporaly.mth

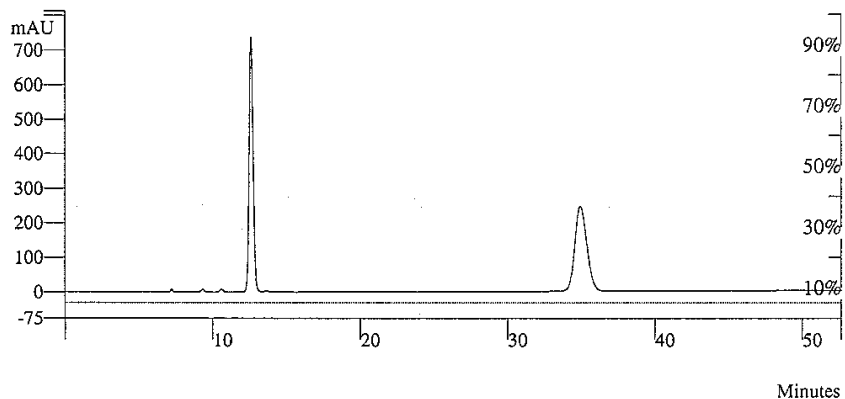

| Peak No | Result () | Ret Time (min) | Time Offset (min) | Peak Area (counts) | Rel Ret Time     | Sep. Code | Width 1/2 (sec) |
|---------|-----------|----------------|-------------------|--------------------|------------------|-----------|-----------------|
| 1       | 49.7482   | 12.600         | 0.000             | 69961256           | 0.00             | BB        | 17.2            |
| 2       | 50.2518   | 34.920         | 0.000             | 70669520           | 0.00             | BB        | 52.5            |
|         |           |                | <b>100.0000</b>   | <b>0.000</b>       | <b>140630784</b> |           |                 |

chiral **2c**

Data File: c:\star\11-11-10 11:05:17 am -1.run Run Mode: Analysis  
 Sample ID: BIP69-2-A 254nm Peak Measurement: Peak Area  
 Operator (Inj): Injection Date: 11/11/10 11:05:17 AM Calibration Level: N/A  
 Run Time (min): 43.360

Injection Method: c:\star\yasuhiro\temporaly.mth

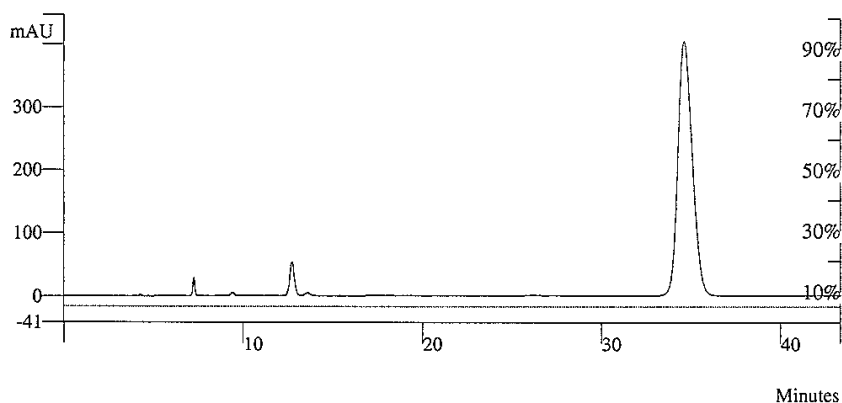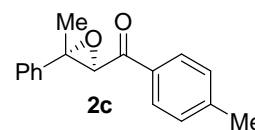

| Peak No | Result () | Ret Time (min) | Time Offset (min) | Peak Area (counts) | Rel Ret Time     | Sep. Code | Width 1/2 (sec) |
|---------|-----------|----------------|-------------------|--------------------|------------------|-----------|-----------------|
| 1       | 4.0338    | 12.707         | 0.000             | 4843680            | 0.00             | BB        | 16.6            |
| 2       | 95.9662   | 34.573         | 0.000             | 115235112          | 0.00             | BB        | 52.2            |
|         |           |                | <b>100.0000</b>   | <b>0.000</b>       | <b>120078792</b> |           |                 |

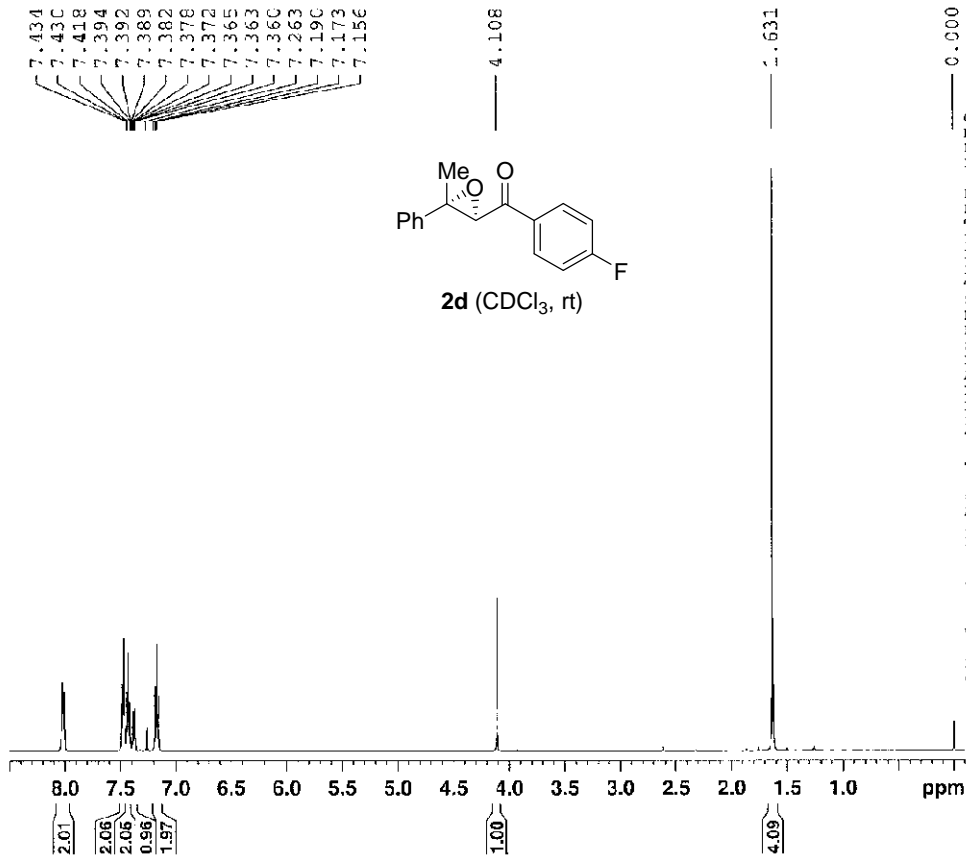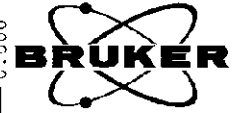

Current Data Parameters  
NAME BT7C-2-A  
EXPNO 1  
PROCNO 1

F2 - Acquisition Parameters  
Date\_ 20110114  
Time 17.31  
INSTRUM spect  
PROBHD 5 mm PABBI 1H/  
PULPROG zg  
TD 59098  
30°VRNT CDC13  
NS 8  
DS 0  
SWH 10000.000 Hz  
FIDRES 0.166672 Hz  
AQ 2.9959499 sec  
RG 64  
DW 50.000 usec  
DE 7.50 usec  
TE 294.9 K  
D1 1.0000000 sec  
TD0 1

===== CHANNEL f1 =====  
NUC1 1H  
P1 5.35 usec  
PL1 0.00 dB  
SFO1 499.8729992 MHz

F2 - Processing parameters  
SI 32768  
SF 499.8700160 MHz  
WDW EM  
SSB 0  
LB 0.30 Hz  
GB 0  
PC 1.00

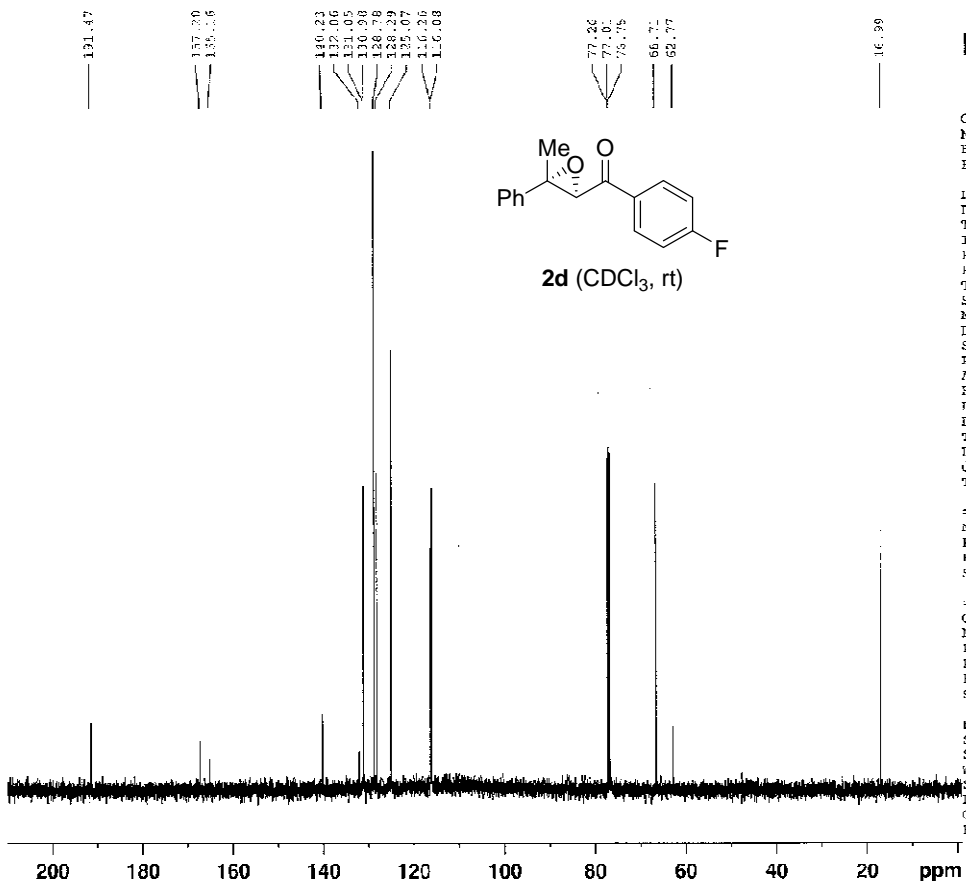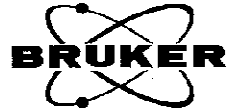

Current Data Parameters  
NAME BT70 2 A BCM  
EXPNO 1  
PROCNO 1

F2 - Acquisition Parameters  
Date 20110114  
Time 19.03  
INSTRUM spect  
PROBHD 5 mm PABBI 1H/  
PULPROG zgdc  
TD 138360  
SOLVENT CDC13  
NS 180  
DS 0  
SWH 37593.984 Hz  
FIDRES 0.275697 Hz  
AQ 1.8136380 sec  
RG 13390.4  
FW 13.300 usec  
DE 7.50 usec  
TE 295.0 K  
D1 2.0000000 sec  
D11 0.0300000 sec  
TD0 1

===== CHANNEL f1 =====  
NUC1 13C  
P1 12.00 usec  
PL1 2.00 dB  
SFO1 125.7024654 MHz

===== CHANNEL f2 =====  
CPDPRG2 waltz16  
NUC2 1H  
PCPD2 90.00 usec  
PL2 0.00 dB  
PL12 28.00 dB  
SFO2 499.8734991 MHz

F2 - Processing parameters  
SI 32768  
SF 125.6924180 MHz  
WDW EM  
SSB 0  
LB 1.00 Hz  
GB 0  
PC 1.40

# Chiral HPLC analysis of compound **2d**

*rac-2d*

Data File: c:\star\11-10-10 2:50:08 pm -1.run Run Mode: Analysis  
 Sample ID: BIP70-rac 254nm Peak Measurement: Peak Area  
 Operator (Inj): AS-H PrOH/Hex 5/95 FR 1.0 Calibration Level: N/A  
 Injection Date: 11/10/10 02:50:08 PM Run Time (min): 52.293

Injection Method: c:\star\yasuhiro\temporal.y.mth

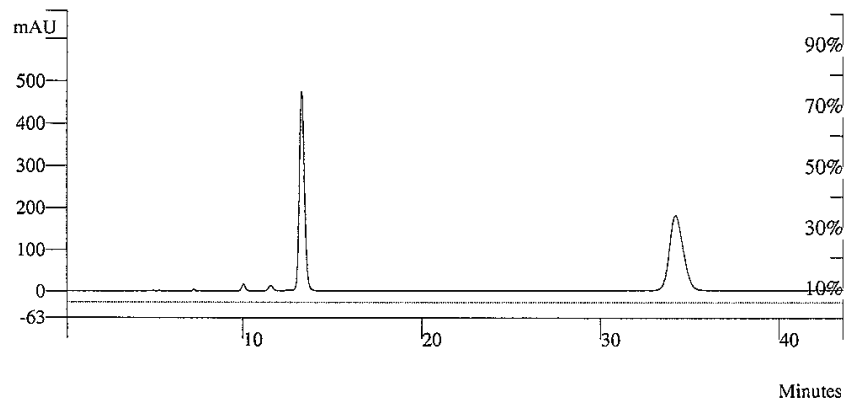

| Peak No | Result () | Ret Time (min)  | Time Offset (min) | Peak Area (counts) | Rel Ret Time | Sep. Code | Width 1/2 (sec) |
|---------|-----------|-----------------|-------------------|--------------------|--------------|-----------|-----------------|
| 1       | 49.5796   | 13.267          | 0.000             | 48385256           | 0.00         | BB        | 18.4            |
| 2       | 50.4204   | 34.200          | 0.000             | 49205740           | 0.00         | BB        | 49.9            |
|         |           | <b>100.0000</b> | <b>0.000</b>      | <b>97590992</b>    |              |           |                 |

*chiral-2d*

Data File: c:\star\11-11-10 11:51:34 am -1.run Run Mode: Analysis  
 Sample ID: BIP70-1-A 254nm Peak Measurement: Peak Area  
 Operator (Inj): AS-H PrOH/Hex 5/95 FR 1.0 Calibration Level: N/A  
 Injection Date: 11/11/10 11:51:34 AM Run Time (min): 40.827

Injection Method: c:\star\yasuhiro\temporal.y.mth

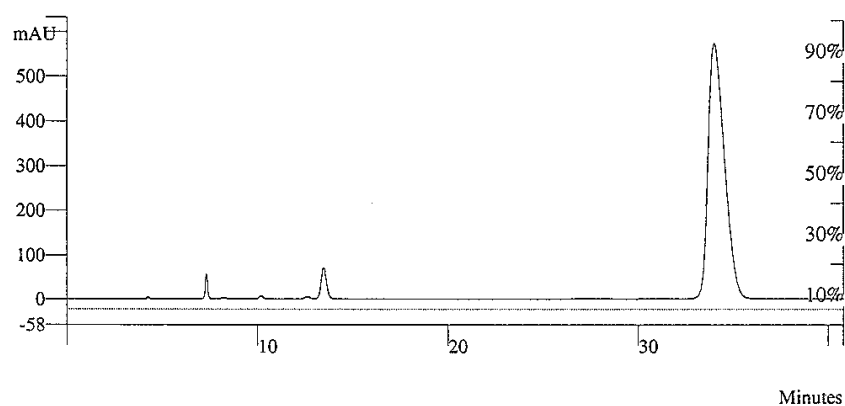

| Peak No | Result () | Ret Time (min)  | Time Offset (min) | Peak Area (counts) | Rel Ret Time | Sep. Code | Width 1/2 (sec) |
|---------|-----------|-----------------|-------------------|--------------------|--------------|-----------|-----------------|
| 1       | 3.8592    | 13.480          | 0.000             | 7048031            | 0.00         | BB        | 18.1            |
| 2       | 96.1408   | 33.987          | 0.000             | 175581072          | 0.00         | BB        | 56.2            |
|         |           | <b>100.0000</b> | <b>0.000</b>      | <b>182629104</b>   |              |           |                 |

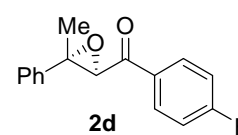

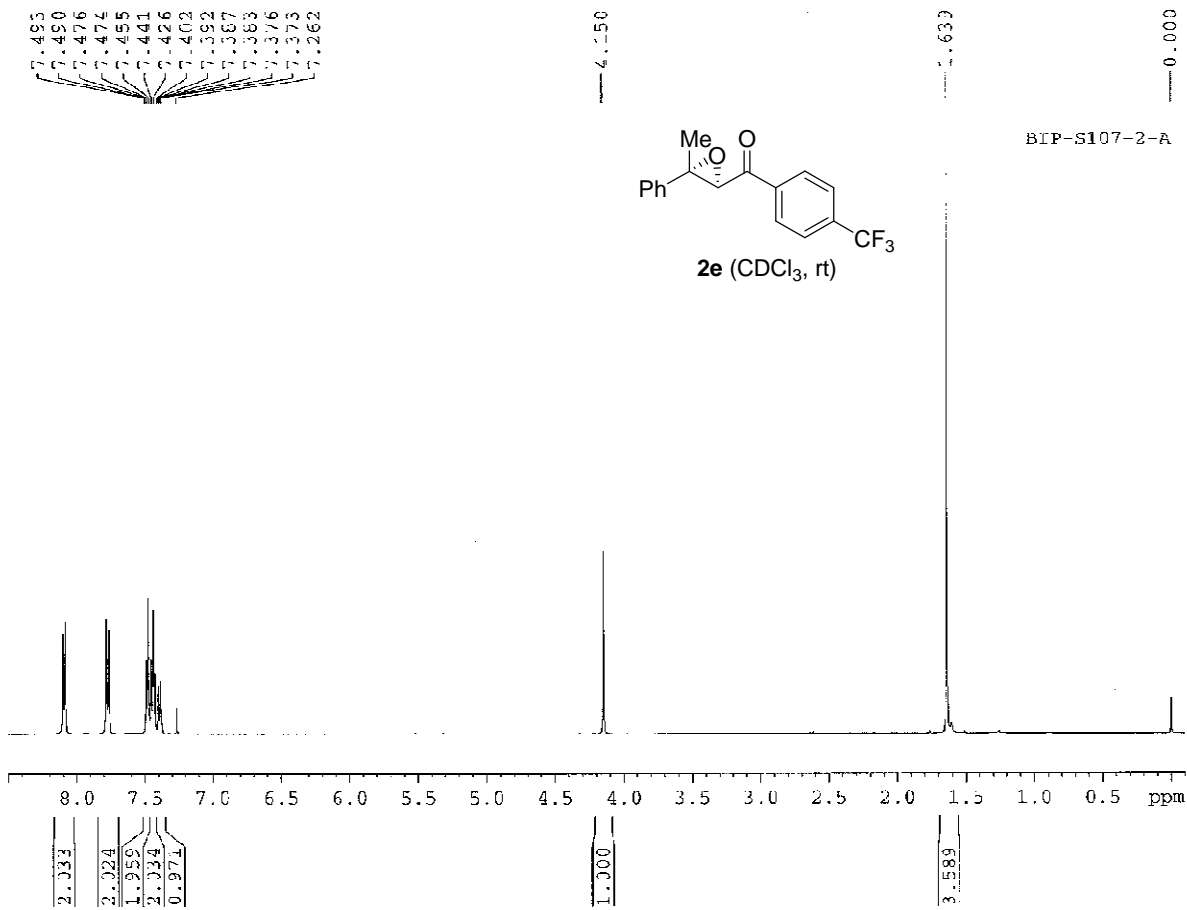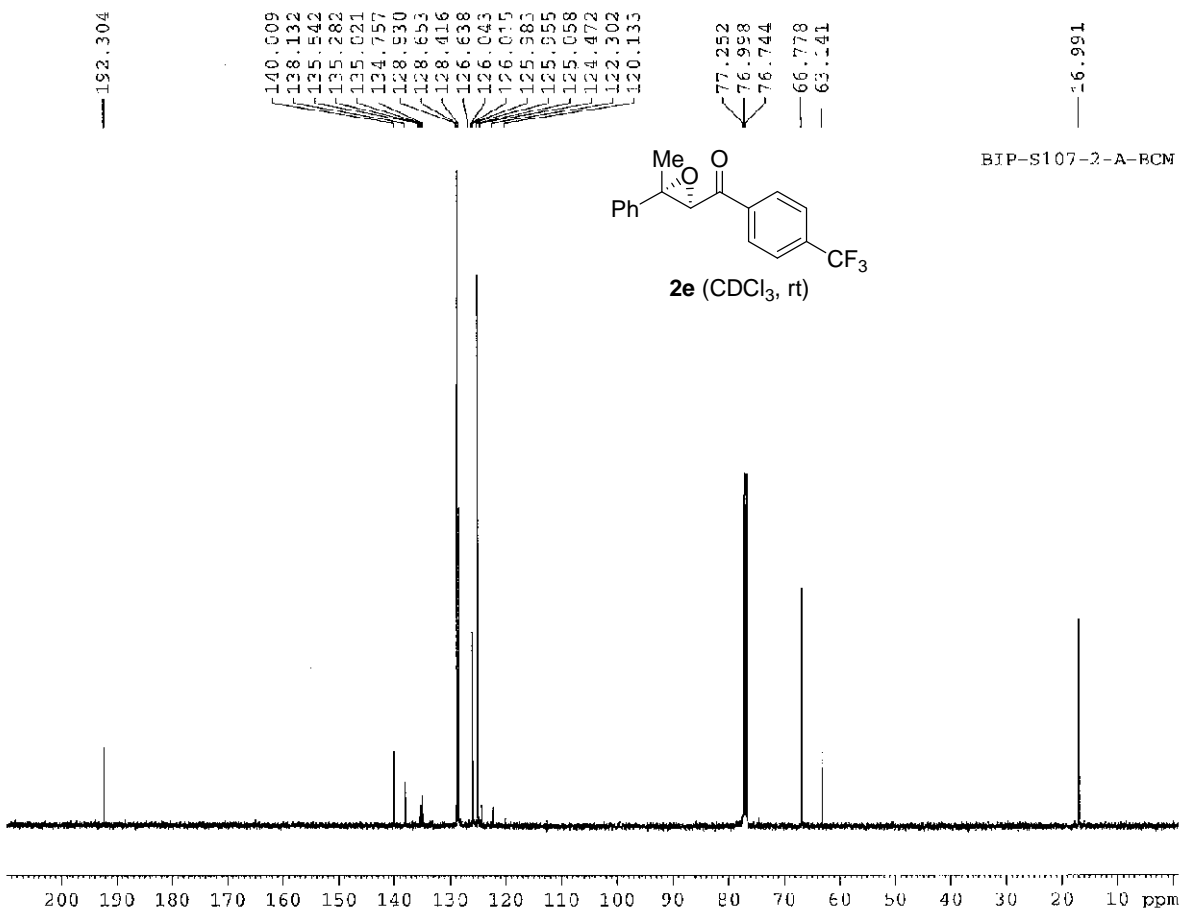

Chiral HPLC analysis of compound **2e**

*rac-2e*

Data File: c:\star\4-9-11 2:20:10 pm -1.run  
 Sample ID: BIP-S107-rac 254nm  
 Operator (Inj): AS-H PrOH/Hex 10/90 FR1.0  
 Injection Date: 04/09/11 02:20:10 PM

Run Mode: Analysis  
 Peak Measurement: Peak Area  
 Calibration Level: N/A  
 Run Time (min): 23.093

Injection Method: c:\star\yasuhiro\temporal\y.mth

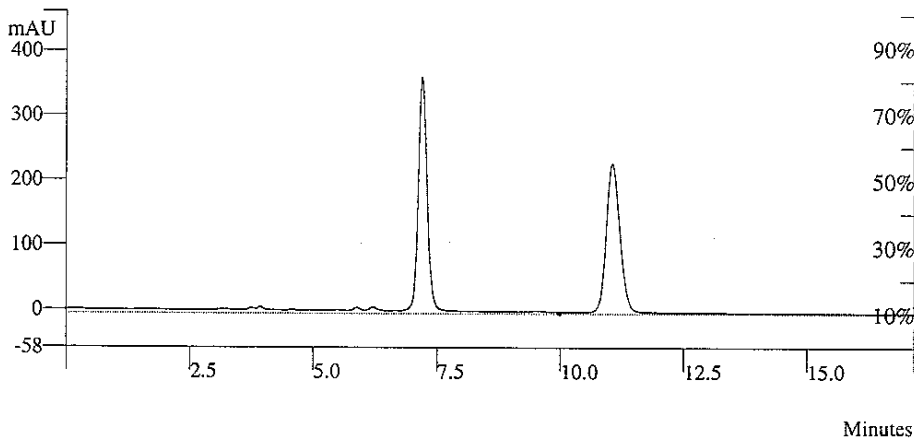

| Peak No | Result () | Ret Time (min) | Time Offset (min) | Peak Area (counts) | Rel Ret Time    | Sep. Code | Width 1/2 (sec) |
|---------|-----------|----------------|-------------------|--------------------|-----------------|-----------|-----------------|
| 1       | 50.2934   | 7.187          | 0.000             | 22690444           | 0.00            | BB        | 11.0            |
| 2       | 49.7066   | 11.053         | 0.000             | 22425706           | 0.00            | BB        | 17.6            |
|         |           |                | <b>100.0000</b>   | <b>0.000</b>       | <b>45116152</b> |           |                 |

*chiral-2e*

Data File: c:\star\4-9-11 4:15:01 pm -1.run  
 Sample ID: BIP-S107-1-A  
 Operator (Inj):  
 Injection Date: 04/09/11 04:15:01 PM

Run Mode: Analysis  
 Peak Measurement: Peak Area  
 Calibration Level: N/A  
 Run Time (min): 20.480

Injection Method: c:\star\yasuhiro\temporal\y.mth

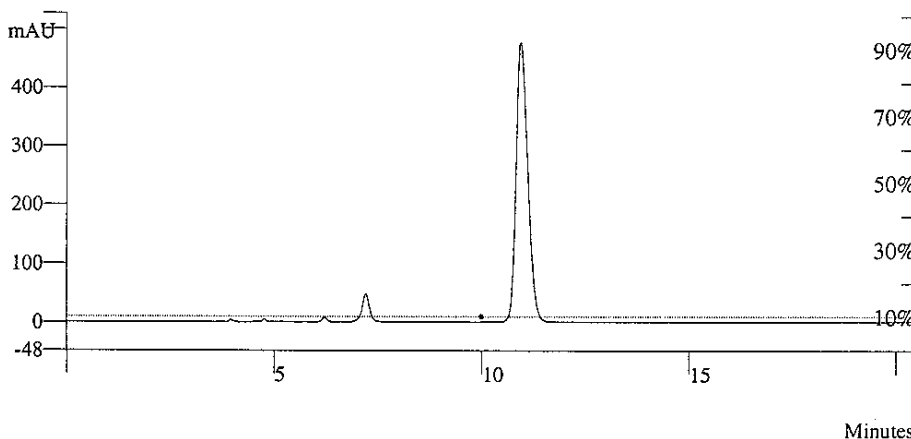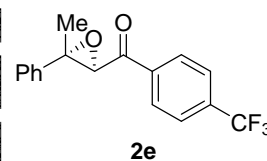

| Peak No | Result () | Ret Time (min) | Time Offset (min) | Peak Area (counts) | Rel Ret Time    | Sep. Code | Width 1/2 (sec) |
|---------|-----------|----------------|-------------------|--------------------|-----------------|-----------|-----------------|
| 1       | 5.6382    | 7.187          | 0.000             | 2848207            | 0.00            | BB        | 10.6            |
| 2       | 94.3618   | 10.947         | 0.000             | 47668300           | 0.00            | BB        | 18.1            |
|         |           |                | <b>100.0000</b>   | <b>0.000</b>       | <b>50516508</b> |           |                 |

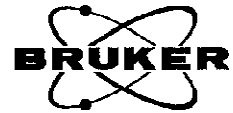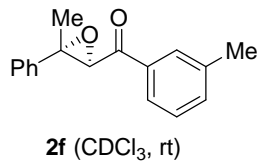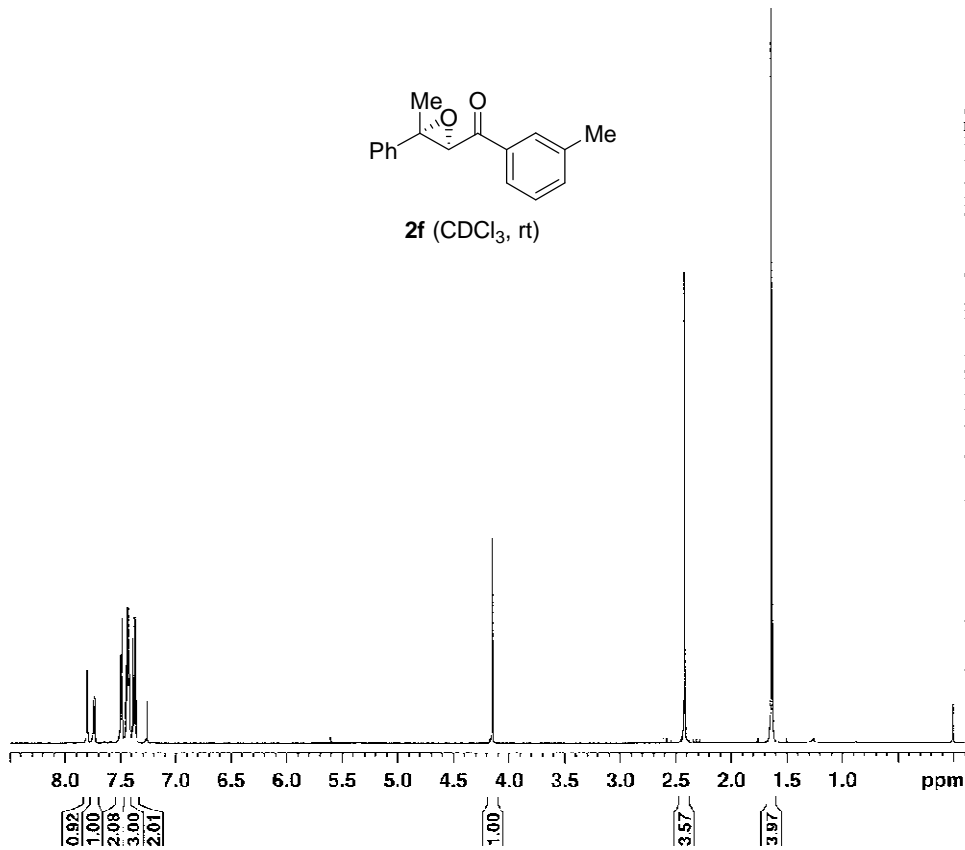

Current Data Parameters  
 NAME BIP79-2-A1  
 EXPNO 2  
 PROCNO 1  
 F2 - Acquisition Parameters  
 Date\_ 20110113  
 Time 17:20  
 INSTRUM spect  
 PROBHD 5 mm PABBI 1H/  
 PULPROG zg  
 TD 59998  
 SOLVENT CDCl3  
 NS 8  
 DS 0  
 SWE 10000.000 Hz  
 FIDRES 0.166672 Hz  
 AQ 2.9999499 sec  
 RG 45.3  
 DW 50.000 usec  
 DE 7.50 usec  
 TE 295.0 K  
 D1 1.0000000 sec  
 TDC -  
 ===== CHANNEL f1 =====  
 NUC1 1H  
 P1 5.35 usec  
 PL1 0.00 dB  
 SFO1 499.8729912 MHz  
 F2 - Processing parameters  
 SI 32768  
 SF 499.8700172 MHz  
 WDW EM  
 SSB 0  
 LB 0.30 Hz  
 GB 0  
 PC 1.00

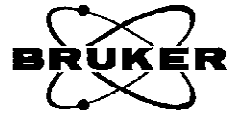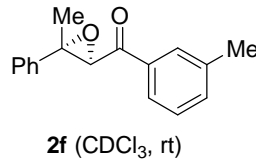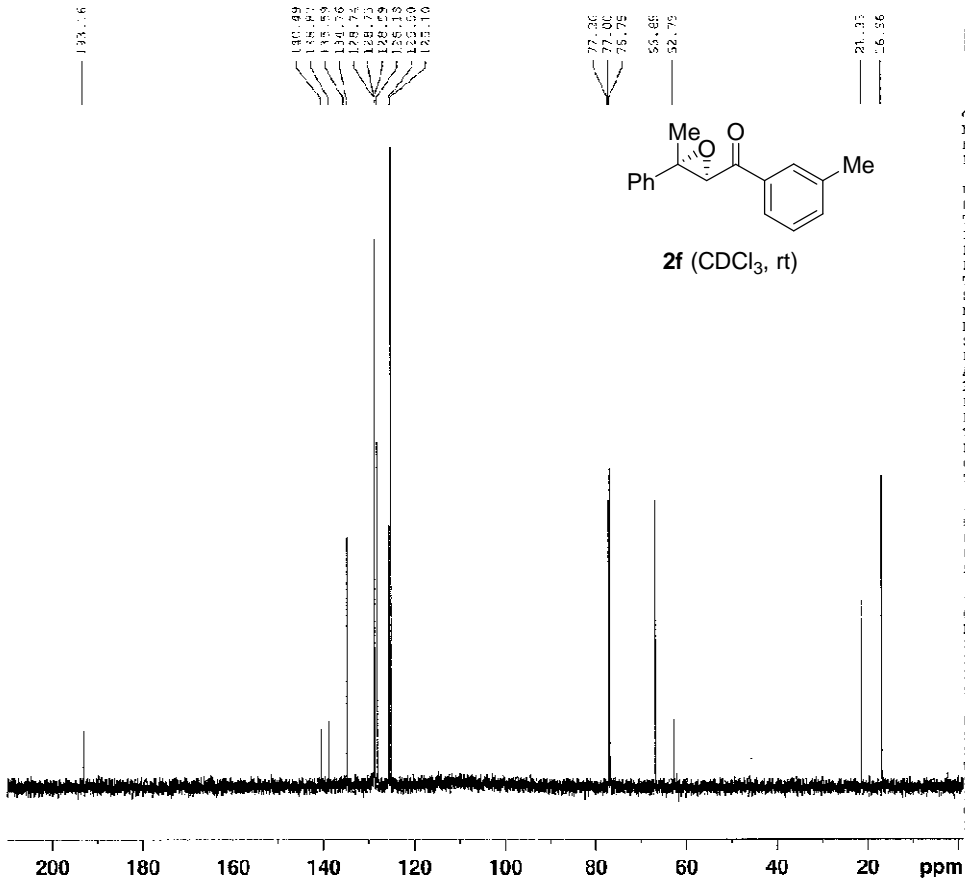

Current Data Parameters  
 NAME BIP79-2-A1-ECM  
 EXPNO 1  
 PROCNO 1  
 F2 - Acquisition Parameters  
 Date\_ 20110113  
 Time 18:21  
 INSTRUM spect  
 PROBHD 5 mm PABBI 1H/  
 PULPROG zgpg30  
 TD 136360  
 SOLVENT CDCl3  
 NS 240  
 DS 0  
 SWE 37593.984 Hz  
 FIDRES 0.275697 Hz  
 AQ 1.8136380 sec  
 RG 14598.5  
 DW 13.300 usec  
 DE 7.50 usec  
 TE 295.1 K  
 D1 2.0000000 sec  
 d11 0.0300000 sec  
 TDC 1  
 ===== CHANNEL f1 =====  
 NUC1 13C  
 P1 12.00 usec  
 PL1 -3.00 dB  
 SFO1 125.7624664 MHz  
 ===== CHANNEL f2 =====  
 CPDPRG2 waltz16  
 NUC2 1H  
 PCPD2 90.00 usec  
 PL2 0.00 dB  
 PL12 28.00 dB  
 SFO2 499.8734991 MHz  
 F2 - Processing parameters  
 SI 32768  
 SF 125.692492 MHz  
 WDW EM  
 SSB 0  
 LB 1.00 Hz  
 GB 0  
 PC 1.40



Chiral HPLC analysis of compound **2f**

*rac-2f*

Data File: c:\star\12-23-10 7:22:29 pm -1.run Run Mode: Analysis  
 Sample ID: BIP79-rac 254nm Peak Measurement: Peak Area  
 Operator (Inj): AS-H PrOH/Hex 10/90 FR1.0 Calibration Level: N/A  
 Injection Date: 12/23/10 07:22:29 PM Run Time (min): 33.253

Injection Method: c:\star\yasuhiro\temporalymth

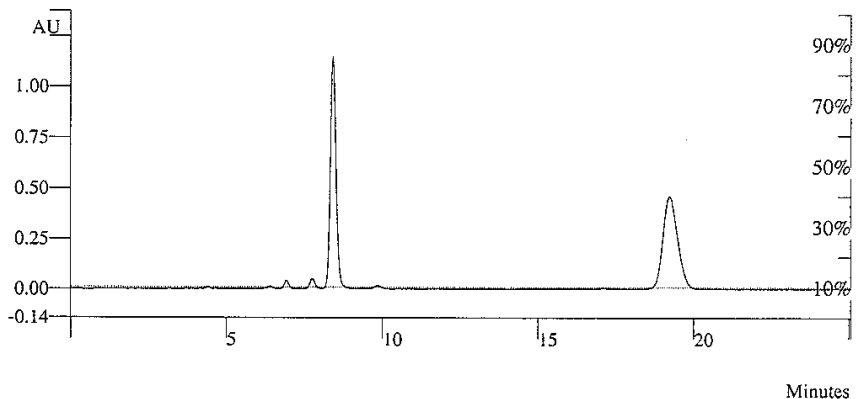

| Peak No | Result () | Ret Time (min) | Time Offset (min) | Peak Area (counts) | Rel Ret Time | Sep. Code | Width 1/2 (sec) |
|---------|-----------|----------------|-------------------|--------------------|--------------|-----------|-----------------|
| 1       | 49.5917   | 8.413          | 0.000             | 75518336           | 0.00         | BB        | 11.8            |
| 2       | 50.4083   | 19.213         | 0.000             | 76761848           | 0.00         | BB        | 30.5            |
|         |           |                | <b>0.000</b>      | <b>152280192</b>   |              |           |                 |

*chiral-2f*

Data File: c:\star\1-12-11 3:06:09 pm -1.run Run Mode: Analysis  
 Sample ID: BIP79-2-A 254nm Peak Measurement: Peak Area  
 Operator (Inj): Injection Date: 01/12/11 03:06:09 PM Calibration Level: N/A  
 Run Time (min): 24.240

Injection Method: c:\star\yasuhiro\temporalymth

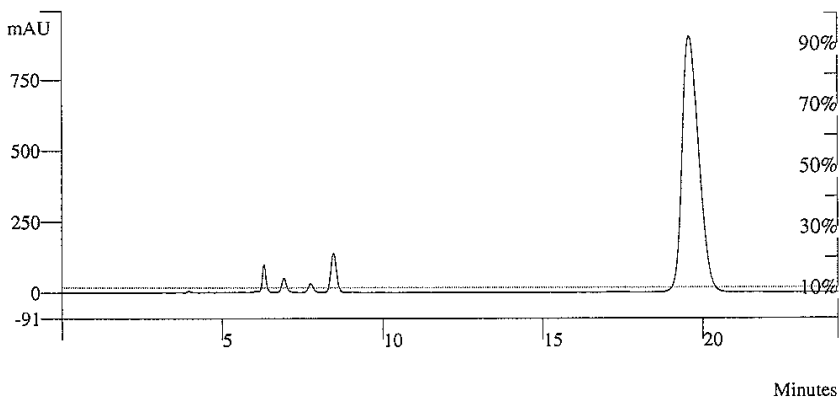

| Peak No | Result () | Ret Time (min) | Time Offset (min) | Peak Area (counts) | Rel Ret Time | Sep. Code | Width 1/2 (sec) |
|---------|-----------|----------------|-------------------|--------------------|--------------|-----------|-----------------|
| 1       | 5.0115    | 8.467          | 0.000             | 8734572            | 0.00         | BB        | 11.5            |
| 2       | 94.9885   | 19.560         | 0.000             | 165556336          | 0.00         | BB        | 33.5            |
|         |           |                | <b>0.000</b>      | <b>174290912</b>   |              |           |                 |

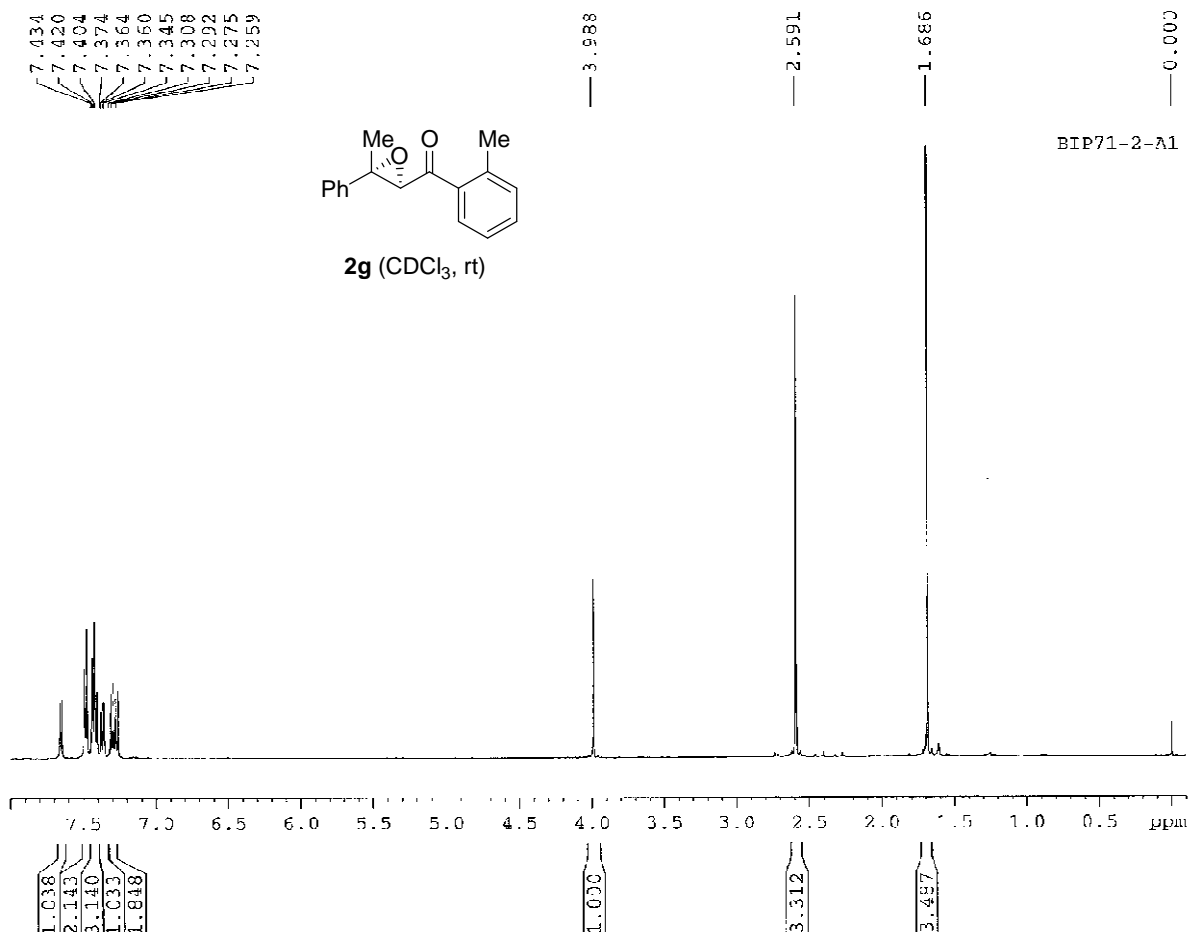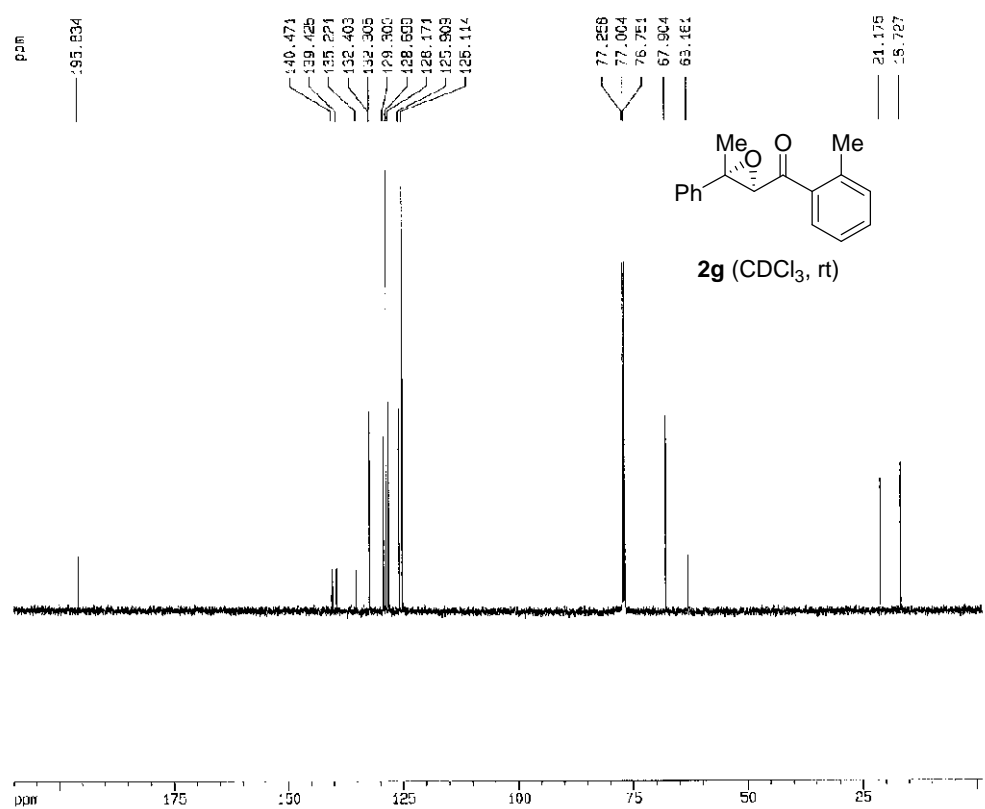

Current Data Parameters  
 NAME BIP71-2-A1-GEN  
 EXPNO 1  
 PROCNO 2

F2 - Acquisition Parameters  
 Date\_ 20110123  
 Time 17.24  
 INSTRUM spect  
 PROBHD 5 mm QNP 1H  
 PULPROG zgpg  
 TD 112760  
 SOLVENT CDCl3  
 VS 200  
 JS 0  
 SWH 37583.384 Hz  
 FIDRES 0.535333 Hz  
 AQ 1.5000246 sec  
 RG 8192  
 DM 13.306 usec  
 DE 7.50 usec  
 TE 300.0 K  
 D1 4.0000000 sec  
 d11 0.0300000 sec

===== CHANNEL f1 =====  
 NUC1 13C  
 P1 8.00 usec  
 PL1 3.00 dB  
 SF01 125.7671798 MHz

===== CHANNEL f2 =====  
 C-PPROG2 waltz16  
 NUC2 1H  
 P2P02 90.00 usec  
 P\_2 120.00 dB  
 P\_12 20.00 dB  
 SF02 500.1330030 MHz

F2 - Processing parameters  
 SI 32738  
 SF 125.7577938 MHz  
 NDM 0  
 SSB 0  
 LB 1.00 Hz  
 GB 0  
 PC 1.40

1D NMR plot parameters  
 CX 20.00 um  
 F1P 210.000 ppr  
 F1 26405.13 Hz  
 F2P -1.000 ppr  
 F2 -125.76 Hz  
 FWHM 10.55000 ppr/cm  
 HZCM 1320.74403 Hz/cm

# Chiral HPLC analysis of compound **2g**

*rac-2g*

Data File: c:\star\11-10-10 3;45;52 pm -1.run      Run Mode: Analysis  
 Sample ID: BIP71-rac 254nm      Peak Measurement: Peak Area  
 Operator (Inj): AS-H PrOH/Hex 5/95 FR1.0      Calibration Level: N/A  
 Injection Date: 11/10/10 03:45:52 PM      Run Time (min): 35.893

Injection Method: c:\star\yasuhiro\temporal.mth

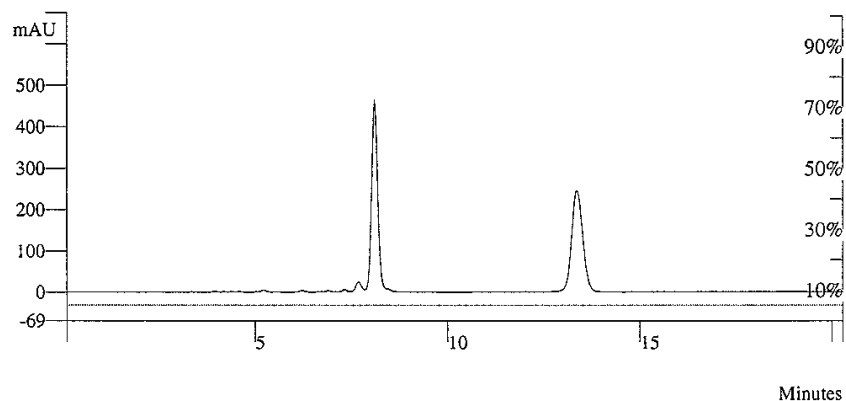

| Peak No | Result () | Ret Time (min) | Time Offset (min) | Peak Area (counts) | Rel Ret Time | Sep. Code | Width 1/2 (sec) |
|---------|-----------|----------------|-------------------|--------------------|--------------|-----------|-----------------|
| 1       | 50.2860   | 8.093          | 0.000             | 25563956           | 0.00         | BB        | 10.0            |
| 2       | 49.7140   | 13.373         | 0.000             | 25273168           | 0.00         | BB        | 18.5            |
|         |           |                | <b>0.0000</b>     | <b>50837124</b>    |              |           |                 |

*chiral-2g*

Data File: c:\star\11-11-10 1;18;13 pm -1.run      Run Mode: Analysis  
 Sample ID: BIP71-2-A 254nm      Peak Measurement: Peak Area  
 Operator (Inj):      Calibration Level: N/A  
 Injection Date: 11/11/10 01:18:13 PM      Run Time (min): 18.773

Injection Method: c:\star\yasuhiro\temporal.mth

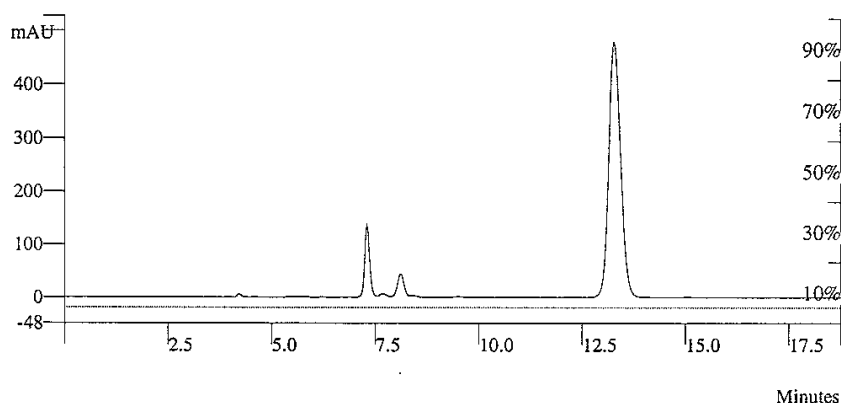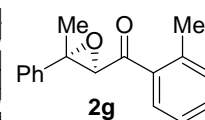

| Peak No | Result () | Ret Time (min) | Time Offset (min) | Peak Area (counts) | Rel Ret Time | Sep. Code | Width 1/2 (sec) |
|---------|-----------|----------------|-------------------|--------------------|--------------|-----------|-----------------|
| 1       | 4.1941    | 8.093          | 0.000             | 2147622            | 0.00         | BB        | 9.6             |
| 2       | 95.8059   | 13.267         | 0.000             | 49058432           | 0.00         | BB        | 18.6            |
|         |           |                | <b>0.0000</b>     | <b>51206056</b>    |              |           |                 |

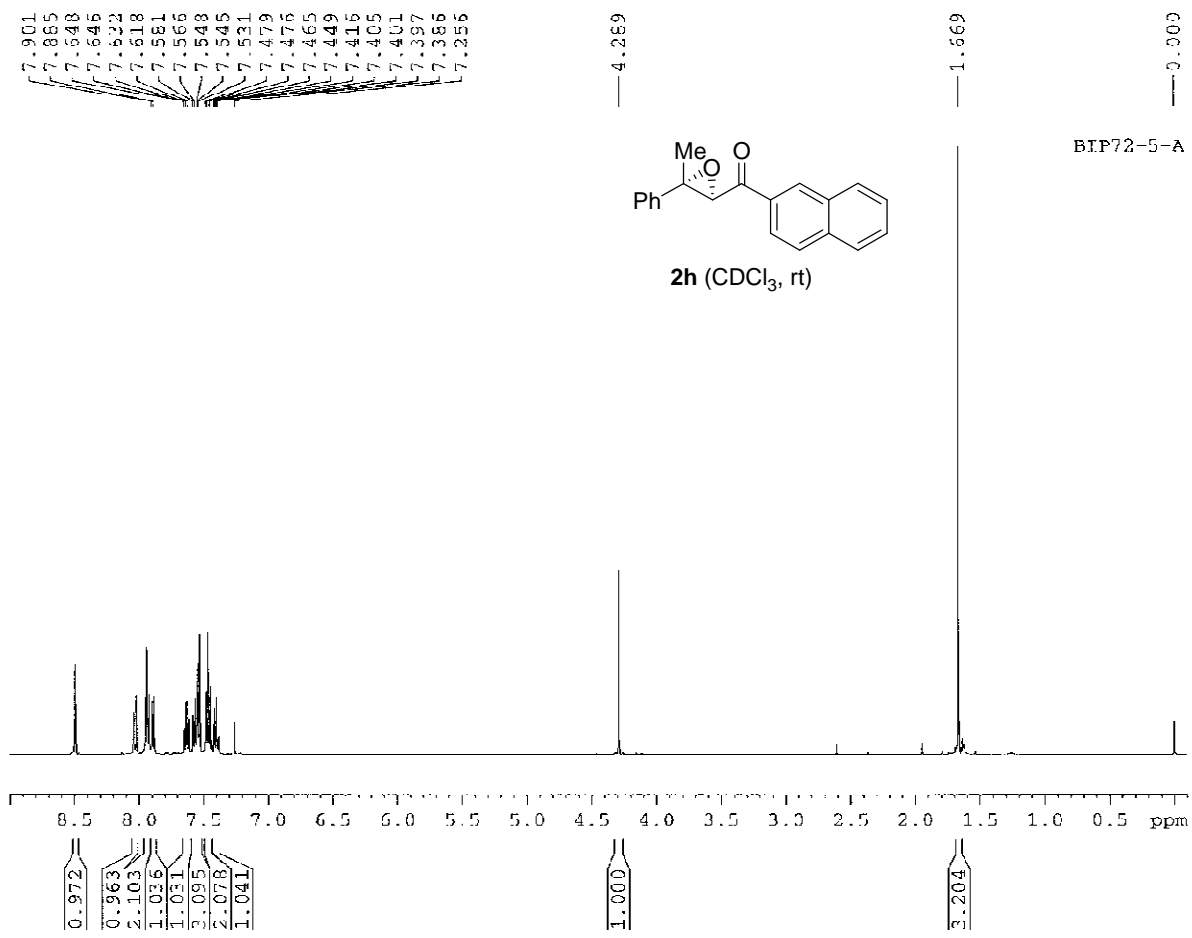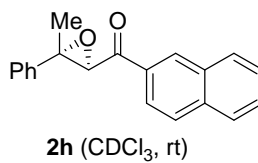

BIP72-5-A

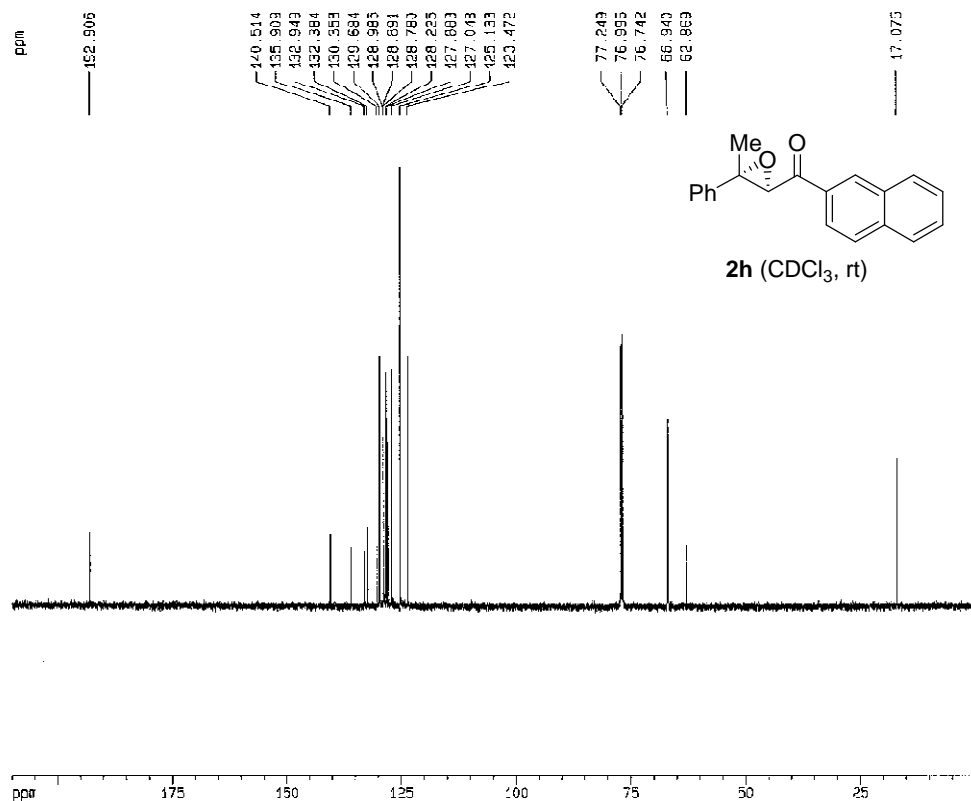

Current Data Parameters  
NAME BIP72-5-A-BCN  
EXPNO 1  
PROCNO 2

F2 - Acquisition Parameters  
Date\_ 20110120  
Time 15.08  
INSTRUM spect  
PROBHD 5 mm QNP 1H  
PULPROG zgpg30  
TD 112780  
SOLVENT CDCl3  
NS 160  
DS 0  
SWH 37592.934 Hz  
FIDRES 0.333330 Hz  
AQ 1.5000240 sec  
RG 5192  
DQ 13.300 usec  
DE 7.50 usec  
TE 300.0 K  
D1 4.0000000 sec  
d11 0.0300000 sec

==== CHANNEL f1 =====  
NUC1 13C  
P1 8.00 usec  
PL1 3.00 dB  
SFO1 125.7671708 MHz

==== CHANNEL f2 =====  
CROSSP2 waltz16  
NUC2 1H  
PCPD2 90.00 usec  
PL2 120.00 dB  
PL12 20.00 dB  
SFO2 500.1360000 MHz

F2 - Processing parameters  
SI 32/68  
SF 125.7577961 MHz  
AQW 0  
SFB 0  
LB 1.00 Hz  
GB 0  
PC 1.40

1D NMR plot parameters  
CX 20.00 cm  
FIP 240.000 ppm  
FI 26409.13 Hz  
F2P -1.000 ppm  
F2 -125.76 Hz  
PPHCH 10.55000 ppm/cm  
HZCH 1326.74463 Hz/cm

# Chiral HPLC analysis of compound **2h**

*rac-2h*

Data File: c:\star\11-18-10 7:05:20 pm -1.run Run Mode: Analysis  
 Sample ID: BIP72-rac 254nm Peak Measurement: Peak Area  
 Operator (Inj): Calibration Level: N/A  
 Injection Date: 11/18/10 07:05:20 PM Run Time (min): 33.573

Injection Method: c:\star\yasuhiro\temporal.y.mth

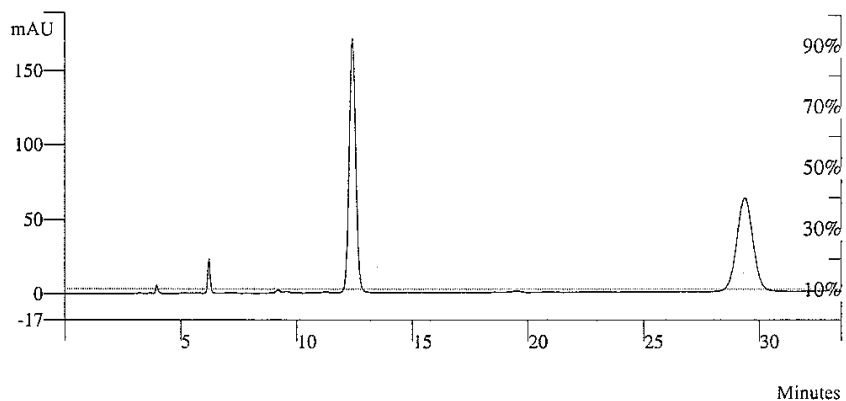

| Peak No | Result () | Ret Time (min)  | Time Offset (min) | Peak Area (counts) | Rel Ret Time | Sep. Code | Width 1/2 (sec) |
|---------|-----------|-----------------|-------------------|--------------------|--------------|-----------|-----------------|
| 1       | 52.3713   | 12.413          | 0.000             | 17317630           | 0.00         | BB        | 18.3            |
| 2       | 47.6287   | 29.373          | 0.000             | 15749393           | 0.00         | BB        | 45.8            |
|         |           | <b>100.0000</b> | <b>0.000</b>      | <b>33067024</b>    |              |           |                 |

*chiral-2h*

Data File: c:\star\11-19-10 2:52:49 pm -1.run Run Mode: Analysis  
 Sample ID: BIP72-5-A 254nm Peak Measurement: Peak Area  
 Operator (Inj): Calibration Level: N/A  
 Injection Date: 11/19/10 02:52:49 PM Run Time (min): 37.520

Injection Method: c:\star\yasuhiro\temporal.y.mth

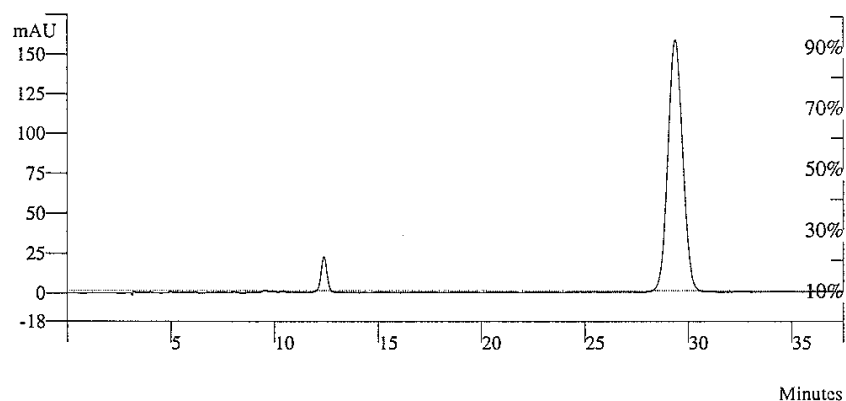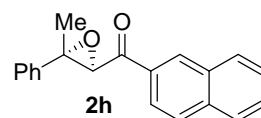

| Peak No | Result () | Ret Time (min)  | Time Offset (min) | Peak Area (counts) | Rel Ret Time | Sep. Code | Width 1/2 (sec) |
|---------|-----------|-----------------|-------------------|--------------------|--------------|-----------|-----------------|
| 1       | 5.0530    | 12.387          | 0.000             | 2156610            | 0.00         | BB        | 17.7            |
| 2       | 94.9470   | 29.347          | 0.000             | 40523036           | 0.00         | BB        | 46.3            |
|         |           | <b>100.0000</b> | <b>0.000</b>      | <b>42679648</b>    |              |           |                 |

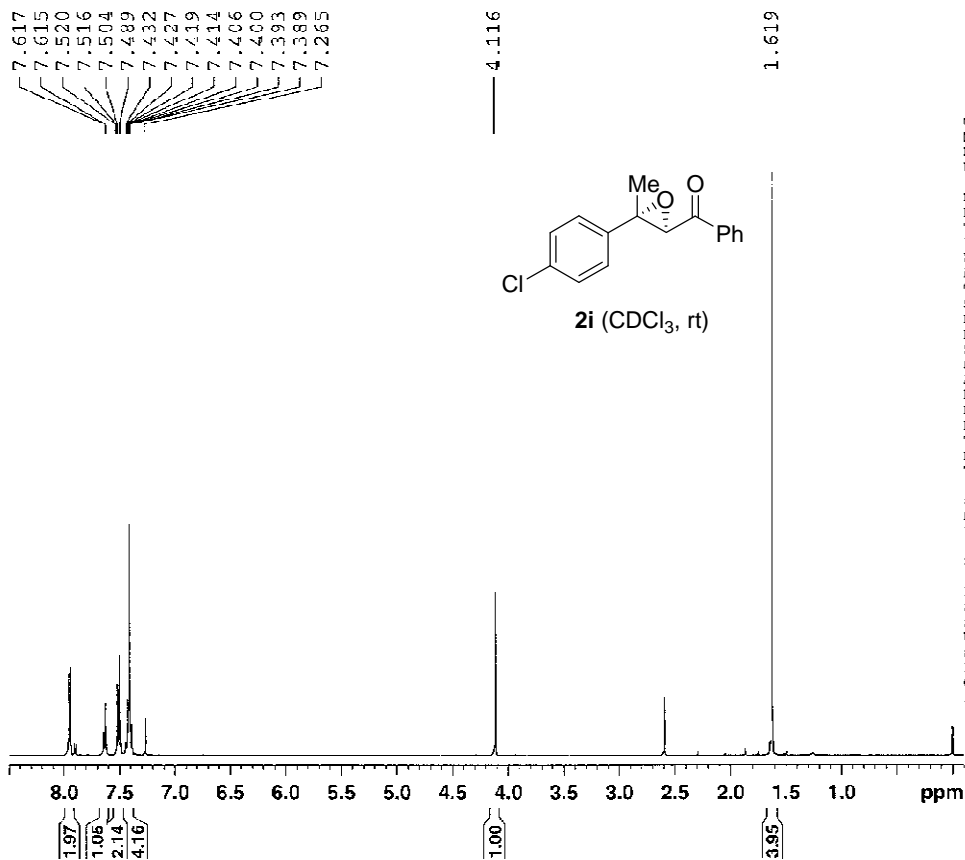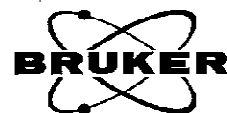

Current Data Parameters  
 NAME BIP76-2-A  
 EXPNO 1  
 PROCNO 1

F2 - Acquisition Parameters  
 Date\_ 20110114  
 Time 17.37  
 INSTRUM spect  
 PROBHD 5 mm PABBI 1H/  
 PULPROG zg  
 TD 4096  
 SOLVENT CDCl3  
 NS 8  
 DS 0  
 SWH 10000.000 Hz  
 FIDRES 0.166672 Hz  
 AQ 2.9999499 sec  
 RG 64  
 DM 50.000 usec  
 DE 7.50 usec  
 TE 294.7 K  
 D1 1.0000000 sec  
 TD0 1

===== CHANNEL f1 =====  
 NUC1 1H  
 P1 5.35 usec  
 PL1 0.00 dB  
 SFO1 499.8729982 MHz

F2 - Processing parameters  
 SI 32768  
 SF 499.870048 MHz  
 WDW EM  
 SSB 0  
 LB 0.30 Hz  
 GB 0  
 PC 1.00

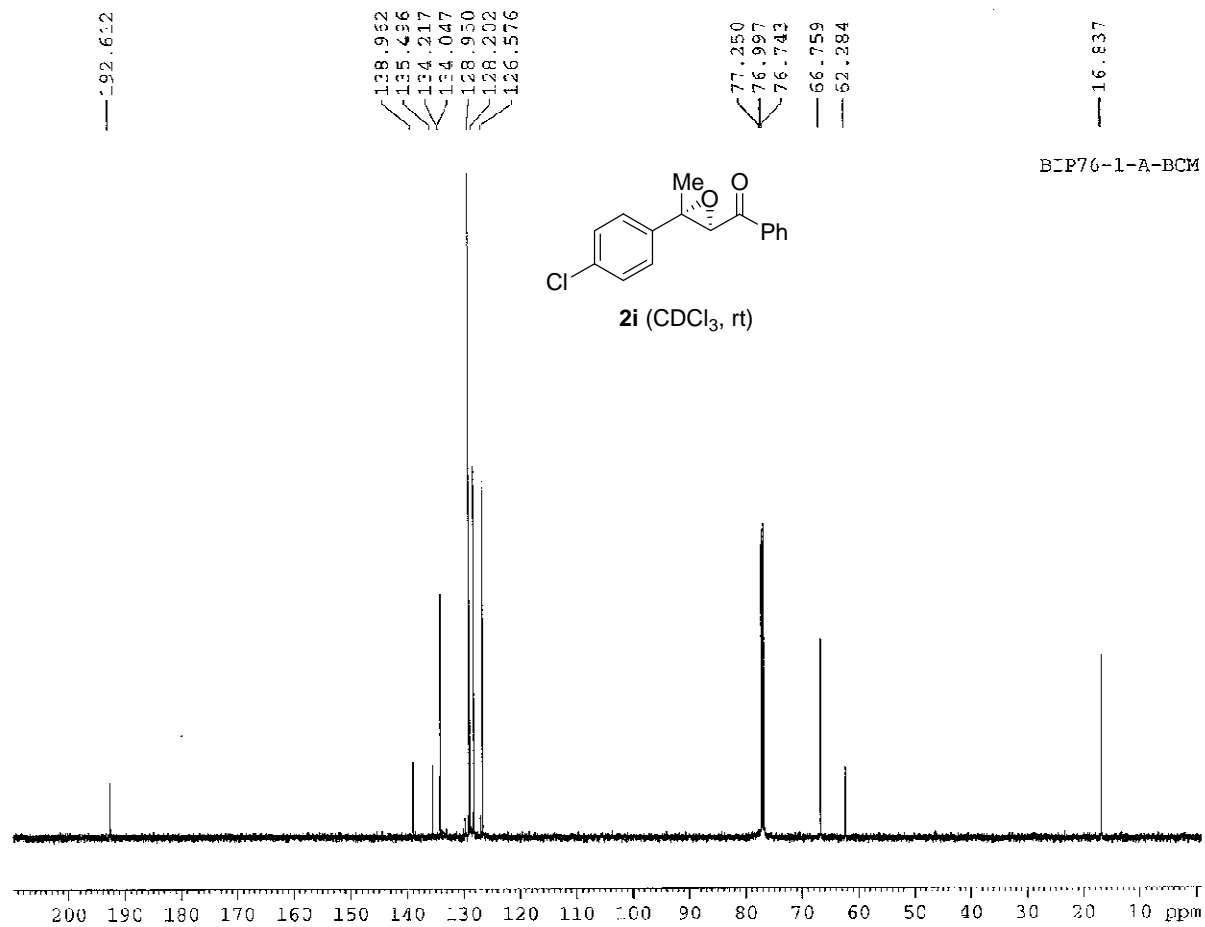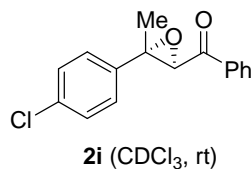

BIP76-1-A-BCM

Chiral HPLC analysis of compound **2i**

*rac-2i*

Data File: c:\star\12-23-10 5;20;33 pm -1.run Run Mode: Analysis  
 Sample ID: BIP76-rac 254nm Peak Measurement: Peak Area  
 Operator (Inj): AS-H PrOH/Hex 10/90 FR1.0 Calibration Level: N/A  
 Injection Date: 12/23/10 05:20:33 PM Run Time (min): 40.560

Injection Method: c:\star\yasuhiro\temporal.y.mth

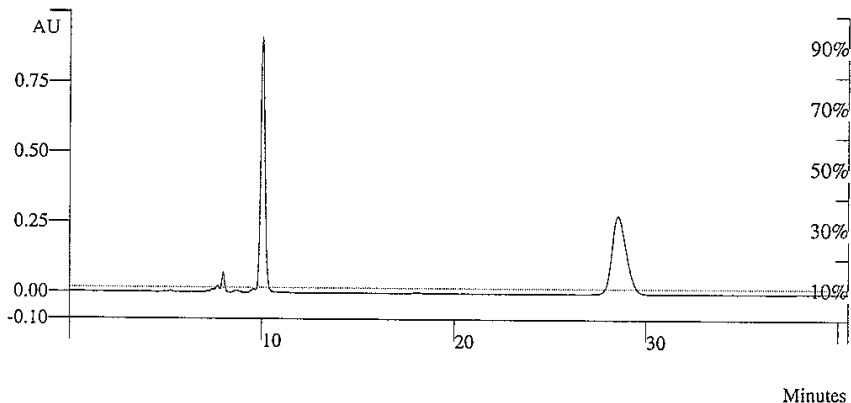

| Peak No | Result () | Ret Time (min)  | Time Offset (min) | Peak Area (counts) | Rel Ret Time | Sep. Code | Width 1/2 (sec) |
|---------|-----------|-----------------|-------------------|--------------------|--------------|-----------|-----------------|
| 1       | 49.1877   | 10.013          | 0.000             | 71183960           | 0.00         | BB        | 14.3            |
| 2       | 50.8123   | 28.520          | 0.000             | 73535112           | 0.00         | BB        | 48.0            |
|         |           | <b>100.0000</b> | <b>0.000</b>      | <b>144719072</b>   |              |           |                 |

*chiral-2i*

Data File: c:\star\1-14-11 2;21;52 pm -1.run Run Mode: Analysis  
 Sample ID: BIP76-2-A 254nm Peak Measurement: Peak Area  
 Operator (Inj): Calibration Level: N/A  
 Injection Date: 01/14/11 02:21:52 PM Run Time (min): 50.880

Injection Method: c:\star\yasuhiro\temporal.y.mth

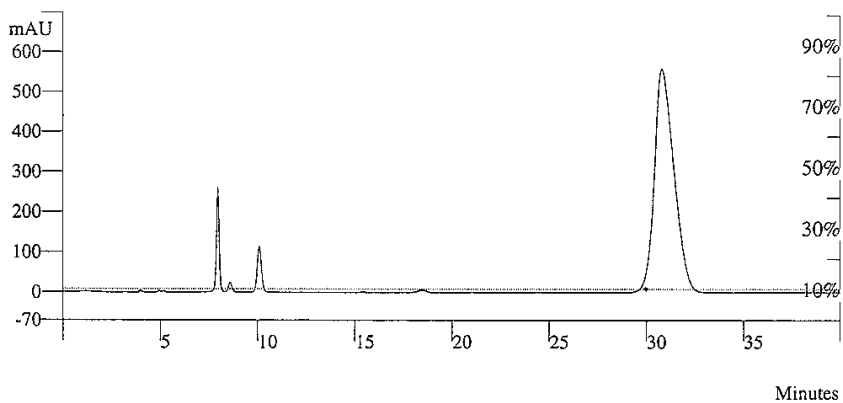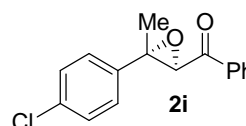

| Peak No | Result () | Ret Time (min)  | Time Offset (min) | Peak Area (counts) | Rel Ret Time | Sep. Code | Width 1/2 (sec) |
|---------|-----------|-----------------|-------------------|--------------------|--------------|-----------|-----------------|
| 1       | 4.2120    | 10.067          | 0.000             | 8787672            | 0.00         | BB        | 13.9            |
| 2       | 95.7880   | 30.787          | 0.000             | 199847744          | 0.00         | BB        | 64.2            |
|         |           | <b>100.0000</b> | <b>0.000</b>      | <b>208635424</b>   |              |           |                 |

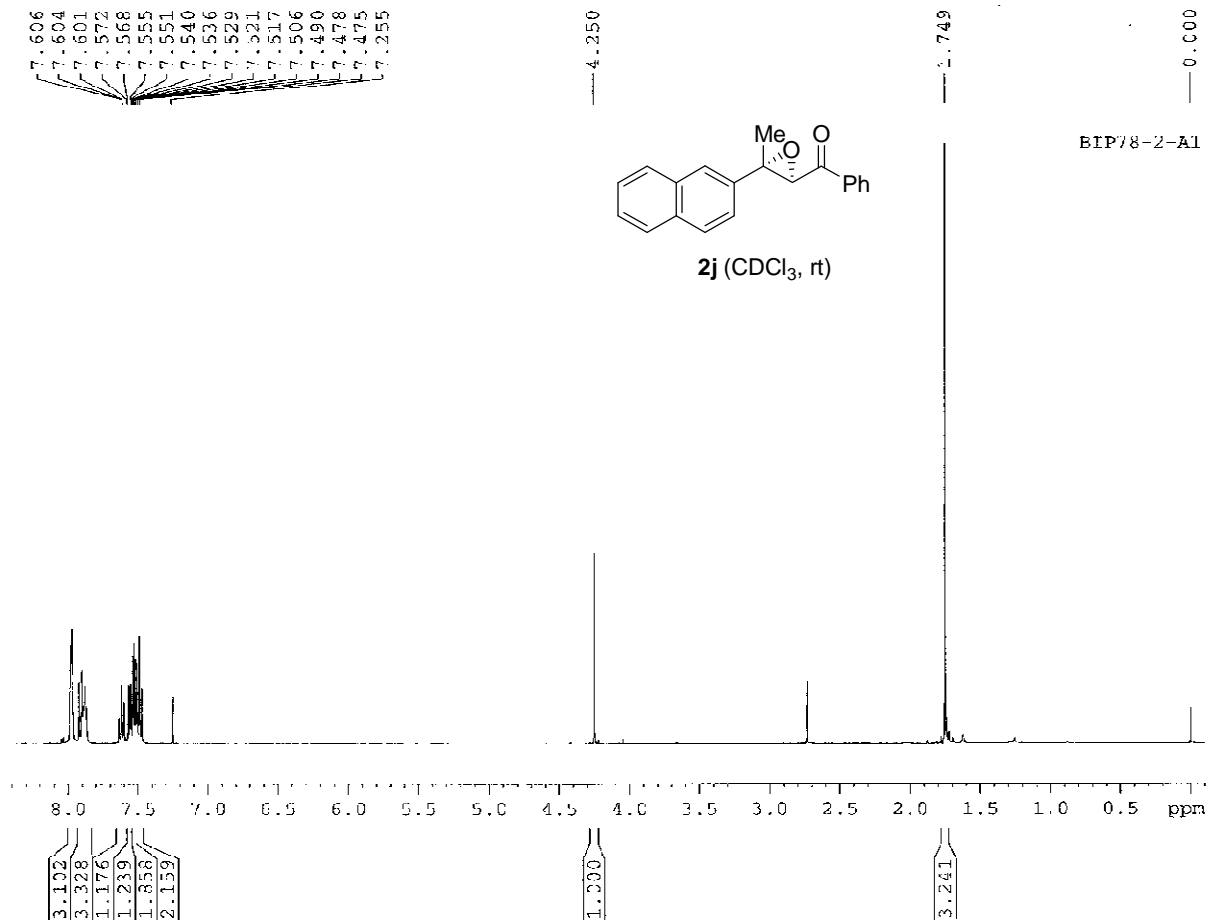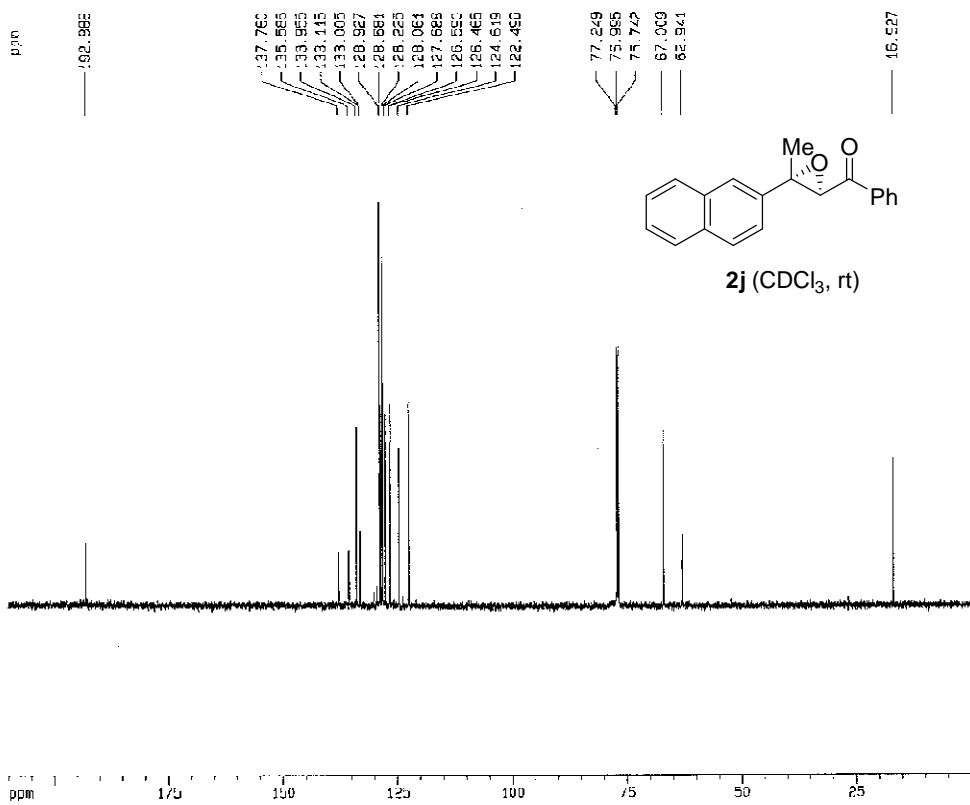

Current Data Parameters  
NAME BIP78-2-A1-BCM  
EXPNO 1  
PROCNO 2

F2 - Acquisition Parameters  
Date\_ 20110119  
Time 12:47  
INSTRUM spect  
PROBHD 5 mm QNP 1H  
PULPROG zgpg30  
TD 112700  
SOLVENT CDCl3  
NS 160  
DS 0  
SWH 17591.984 Hz  
FIDRES 0.333333 Hz  
AQ 1.5009240 sec  
RG 9152  
DM 13.300 usec  
DE 7.50 usec  
TE 300.2 K  
D1 4.80000000 sec  
d11 0.03000000 sec

===== CHANNEL f1 =====  
NUC1 13C  
P1 8.00 usec  
PL1 0.00 dB  
SFO1 125.761706 MHz

===== CHANNEL f2 =====  
CPDPRG2 waltz16  
NUC2 1H  
PCPD2 91.00 usec  
PL2 12.00 dB  
PI12 21.00 dB  
SFO2 500.133000 MHz

F2 Processing parameters  
SI 32768  
SF 125.7577951 MHz  
NM 16  
SSB 0  
LB 1.00 Hz  
GB 0  
PC 1.40

1D NMR plot parameters  
CX 20.00 um  
FIP 210.000 ppa  
F1 20409.13 Hz  
F2P -1.000 ppa  
F2 -125.76 Hz  
PPHMC 10.55000 ppa/cm  
HZCN 1326.74463 Hz/cm



# Chiral HPLC analysis of compound 2j

*rac*-2j

Data File: c:\star\1-18-11 12:18:59 am -1.run      Run Mode: Analysis  
 Sample ID: BIP78-rac 254nm      Peak Measurement: Peak Area  
 Operator (Inj): AS-H PrOH/Hex 10/90 FR1.0      Calibration Level: N/A  
 Injection Date: 01/18/11 12:18:59 AM      Run Time (min): 49.787

Injection Method: c:\star\yasuhiro\temporal.y.mth

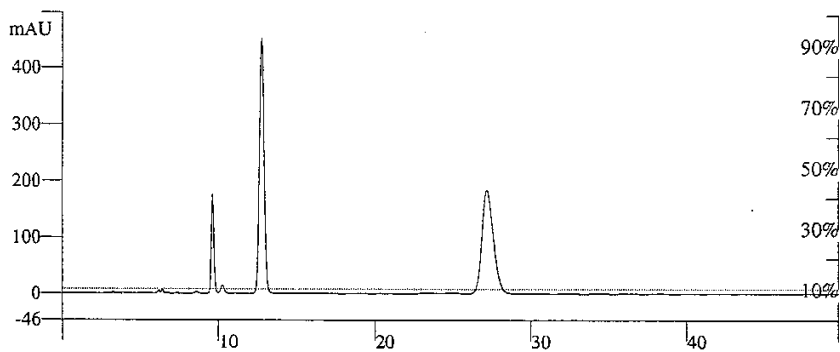

| Peak No | Result () | Ret Time (min)  | Time Offset (min) | Peak Area (counts) | Rel Ret Time | Sep. Code | Width 1/2 (sec) |
|---------|-----------|-----------------|-------------------|--------------------|--------------|-----------|-----------------|
| 1       | 50.0059   | 12.733          | 0.000             | 47659984           | 0.00         | BB        | 19.1            |
| 2       | 49.9941   | 27.187          | 0.000             | 47648672           | 0.00         | BB        | 47.0            |
|         |           | <b>100.0000</b> | <b>0.000</b>      | <b>95308656</b>    |              |           |                 |

chiral-2j

Data File: c:\star\1-18-11 10:34:27 pm -1.run      Run Mode: Analysis  
 Sample ID: BIP78-2-A 254nm      Peak Measurement: Peak Area  
 Operator (Inj):      Calibration Level: N/A  
 Injection Date: 01/18/11 10:34:27 PM      Run Time (min): 40.373

Injection Method: c:\star\yasuhiro\temporal.y.mth

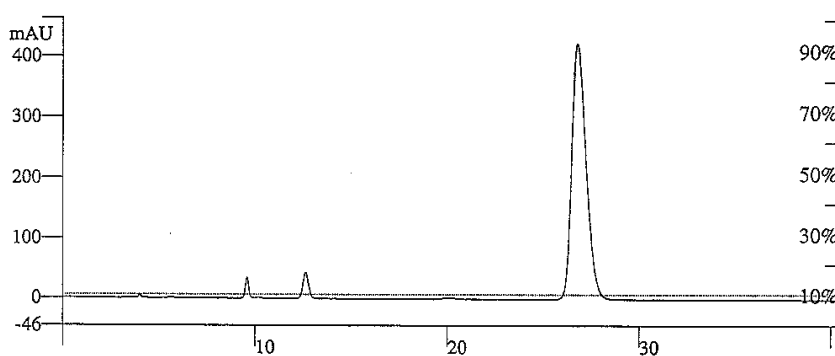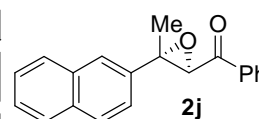

| Peak No | Result () | Ret Time (min)  | Time Offset (min) | Peak Area (counts) | Rel Ret Time | Sep. Code | Width 1/2 (sec) |
|---------|-----------|-----------------|-------------------|--------------------|--------------|-----------|-----------------|
| 1       | 3.7732    | 12.627          | 0.000             | 4420293            | 0.00         | BB        | 18.6            |
| 2       | 96.2268   | 26.787          | 0.000             | 112730496          | 0.00         | BB        | 48.4            |
|         |           | <b>100.0000</b> | <b>0.000</b>      | <b>117150792</b>   |              |           |                 |

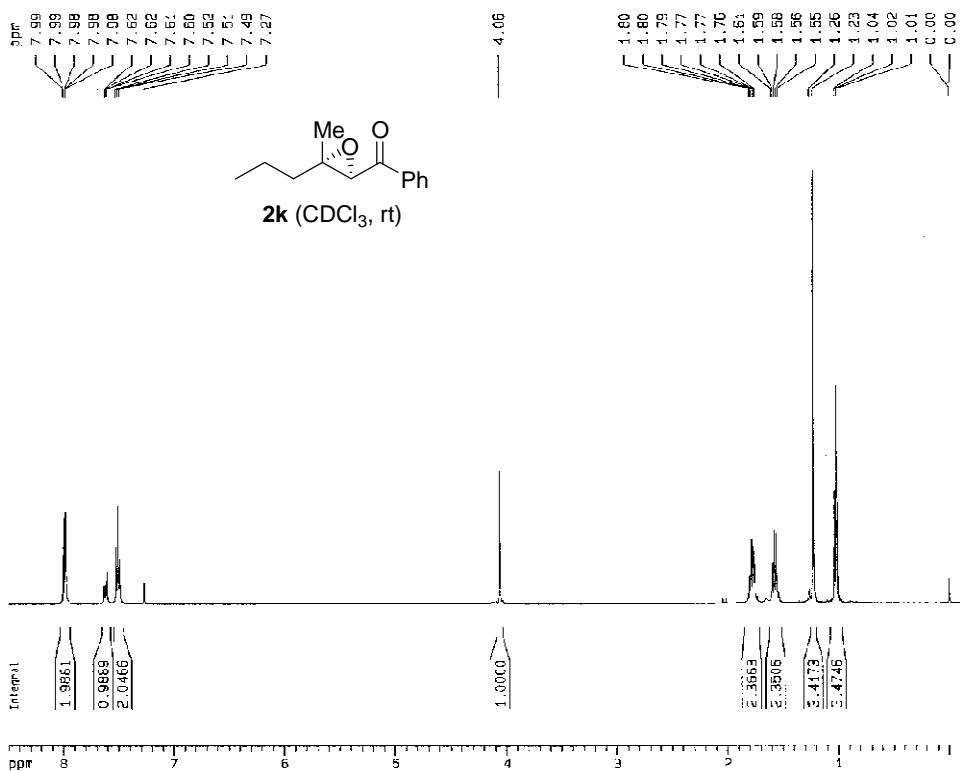

Current Data Parameters  
 NAME BIP01-1-A  
 EXPNO 1  
 PROCNO 2

F2 - Acquisition Parameters  
 Date\_ 20110110  
 Time 18:16  
 INSTRUM spect  
 PROBRF 5 nm QNP 5H  
 PULPROG zg  
 TO 40070  
 SOLVENT CDCl3  
 NS 8  
 DS 0  
 SWH 8012.870 Hz  
 FIDRES 0.150670 Hz  
 AQ 2.000000000 sec  
 RS 64  
 DW 62.400 usec  
 DE 4.50 usec  
 TE 300.0 K  
 D1 3.000000000 sec

===== CHANNEL f1 =====  
 NUC1 1H  
 P1 9.00 usec  
 W 1 0.00 dB  
 SFO1 500.1320000 MHz

F2 - Processing parameters  
 SI 55636  
 ST 500.1320000 MHz  
 WOH 0  
 SSB 0  
 LB 0.30 Hz  
 GB 0  
 PC 1.00

1D NMR plot parameters  
 CX 20.00 cm  
 FFP 0.500 ppm  
 F1 400.10 Hz  
 F2 -0.100 ppm  
 F2 50.00 Hz  
 PPRCM 0.43000 ppm/cm  
 FPCM 215.05991 Hz/cm

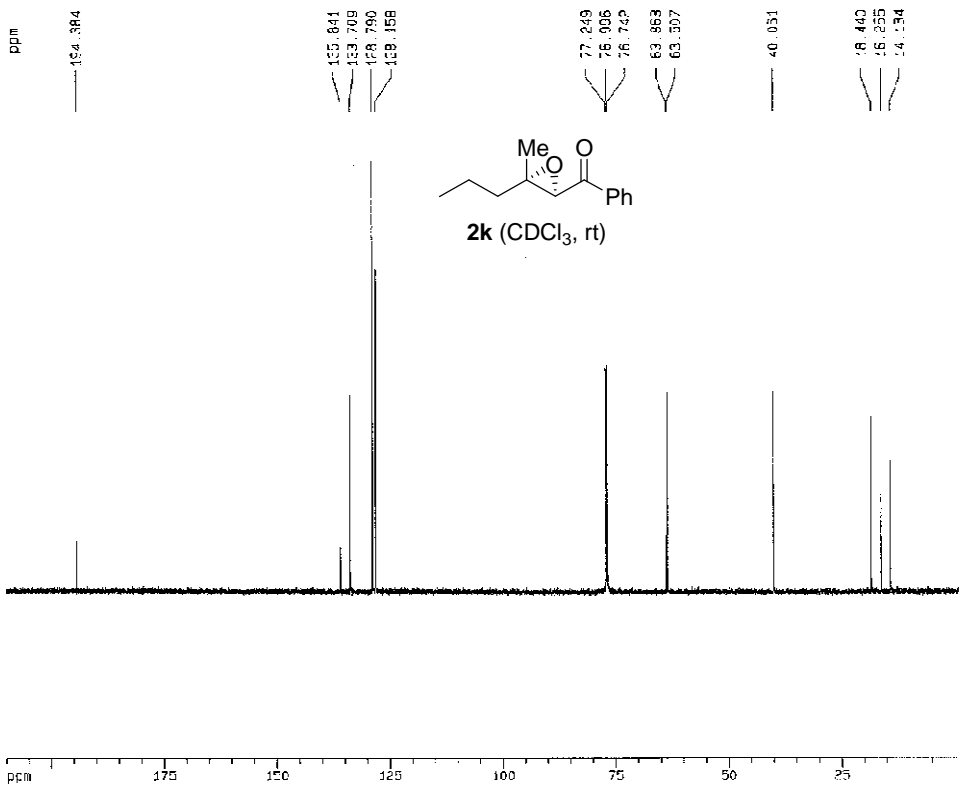

Current Data Parameters  
 NAME BIP01-1-A-10M  
 EXPNO 1  
 PROCNO 2

F2 - Acquisition Parameters  
 Date\_ 20110110  
 Time 18:25  
 INSTRUM spect  
 PROBRF 5 nm QNP 5H  
 PULPROG zgpg30  
 TO 12760  
 SOLVENT CDCl3  
 NS 160  
 DS 0  
 SWH 37593.964 Hz  
 FIDRES 0.333358 Hz  
 AQ 1.5000240 sec  
 Re 8152  
 DE 13.300 usec  
 DC 7.50 usec  
 TC 300.0 K  
 D1 4.000000000 sec  
 d11 0.030000000 sec

===== CHANNEL f1 =====  
 NUC1 13C  
 P1 8.00 usec  
 PL1 3.00 dB  
 SFO1 125.7611000 MHz

===== CHANNEL f2 =====  
 NUC2 1H  
 P2 0.00 usec  
 PL2 120.00 dB  
 F1 400.10 Hz  
 SFO2 500.1320000 MHz

F2 - Processing parameters  
 SI 32788  
 SF 125.7611000 MHz  
 WOH 0  
 SSB 0  
 LB 1.00 Hz  
 GB 0  
 PC 1.40

1D NMR plot parameters  
 CX 20.00 cm  
 FFP 210.000 ppm  
 F1 20000.00 Hz  
 F2 -1.000 ppm  
 F2 -125.76 Hz  
 PPRCM 10.50000 ppm/cm  
 FPCM 1325.74463 Hz/cm

Chiral HPLC analysis of compound **2k**

*rac* **2k**

Data File: c:\star\1-6-11 6:17:32 pm -1.run  
 Sample ID: BIP81-rac 254nm  
 Operator (Inj): AS-H PrOH/Hex 10/90 FR1.0  
 Injection Date: 01/06/11 06:17:32 PM

Run Mode: Analysis  
 Peak Measurement: Peak Area  
 Calibration Level: N/A  
 Run Time (min): 56.373

Injection Method: c:\star\yasuhiro\temporal.y.mth

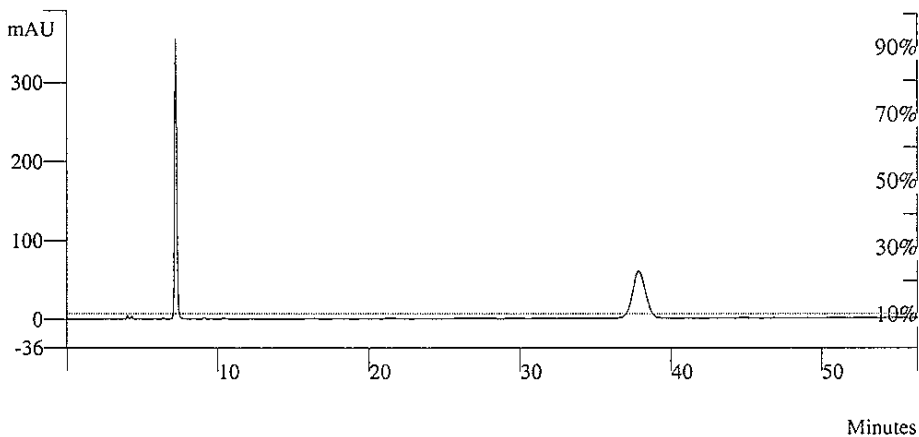

| Peak No | Result () | Ret Time (min)  | Time Offset (min) | Peak Area (counts) | Rel Ret Time | Sep. Code | Width 1/2 (sec) |
|---------|-----------|-----------------|-------------------|--------------------|--------------|-----------|-----------------|
| 1       | 49.7091   | 7.187           | 0.000             | 17879268           | 0.00         | BB        | 9.0             |
| 2       | 50.2909   | 37.853          | 0.000             | 18088532           | 0.00         | BB        | 55.1            |
|         |           | <b>100.0000</b> | <b>0.000</b>      | <b>35967800</b>    |              |           |                 |

chiral-**2k**

Data File: c:\star\4-21-11 10:22:16 am -1.run  
 Sample ID: BIP81-2-A 254nm  
 Operator (Inj):  
 Injection Date: 04/21/11 10:22:16 AM

Run Mode: Analysis  
 Peak Measurement: Peak Area  
 Calibration Level: N/A  
 Run Time (min): 44.320

Injection Method: c:\star\yasuhiro\temporal.y.mth

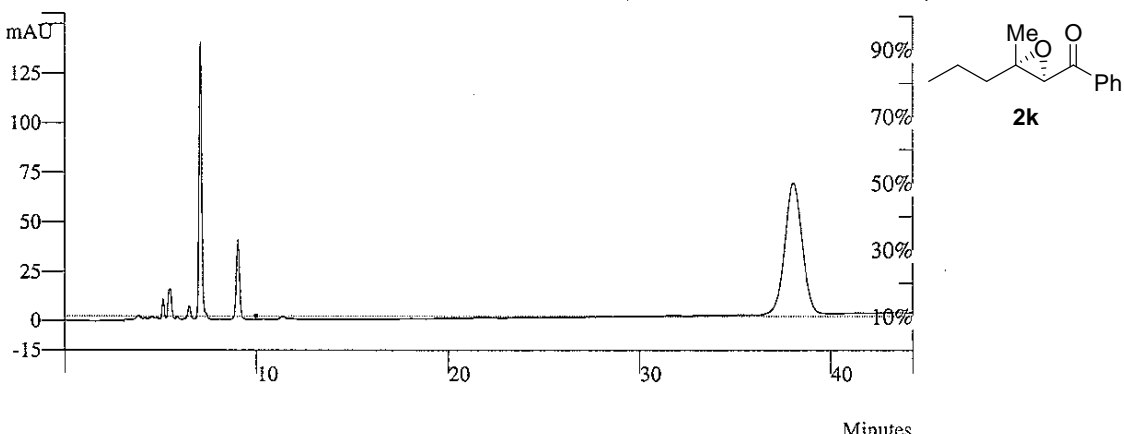

| Peak No | Result () | Ret Time (min)  | Time Offset (min) | Peak Area (counts) | Rel Ret Time | Sep. Code | Width 1/2 (sec) |
|---------|-----------|-----------------|-------------------|--------------------|--------------|-----------|-----------------|
| 1       | 24.6830   | 7.080           | 0.000             | 7055874            | 0.00         | BB        | 8.8             |
| 2       | 75.3170   | 38.013          | 0.000             | 21530118           | 0.00         | BB        | 58.4            |
|         |           | <b>100.0000</b> | <b>0.000</b>      | <b>28585992</b>    |              |           |                 |

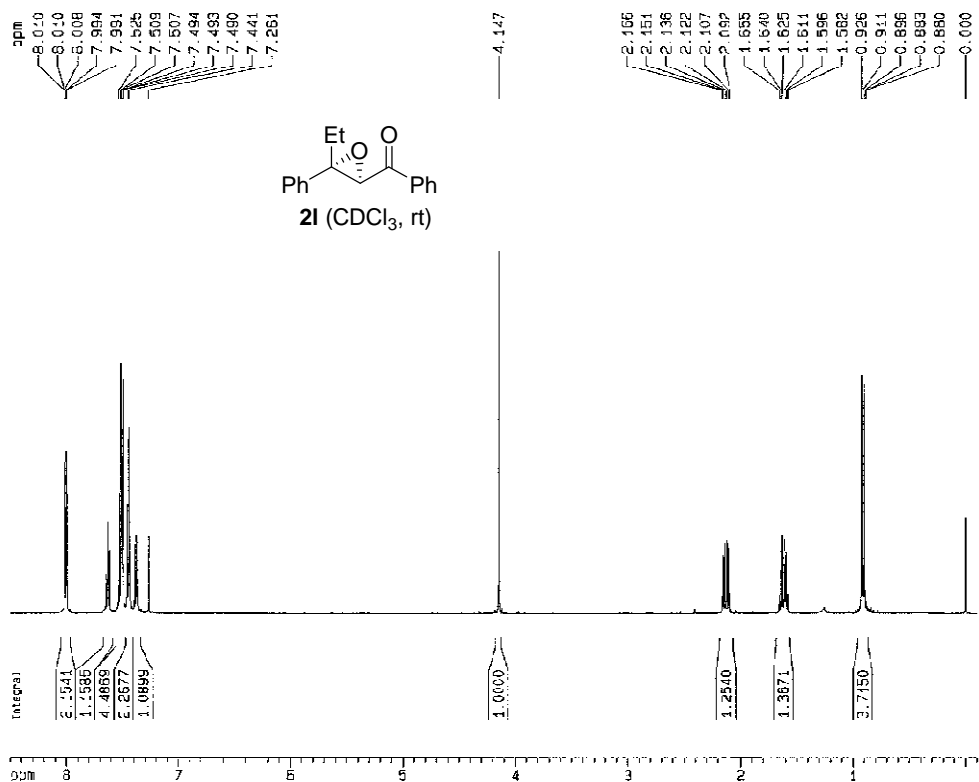

Current Data Parameters  
 NAME 81P58-2-A  
 EXPNO 1  
 PROCNO 2

F2 - Acquisition Parameters  
 Date\_ 20101217  
 Time 19.22  
 INSTRUM spect  
 PROBRD 5 mm QNP 1H  
 PULPROG zg  
 TD 43076  
 SOLVENT CDCl3  
 VS 8  
 DS 0  
 SWH 8012.820 Hz  
 FIDRES 0.163670 Hz  
 AQ 2.9993924 sec  
 RG 120  
 DN 62.400 usec  
 DE 4.50 usec  
 TE 300.2 K  
 TS 1.000000000 sec

----- CHANNEL f1 -----  
 NUC1 1H  
 P1 3.00 usec  
 PL1 0.00 dB  
 SFO1 500.1325006 MHz

F2 - Processing parameters  
 SI 60546  
 SF 500.1320129 MHz  
 ADW EM  
 SGB 0  
 LB 0.30 Hz  
 CB 0  
 PC 1.00

1D NMR plot parameters  
 CX 20.00 cm  
 FXP 0.500 ppm  
 F1 4251.10 Hz  
 F2P -0.100 ppm  
 F2 -50.01 Hz  
 PPM24 0.43000 ppm/cm  
 HZCM 215.07581 Hz/cm

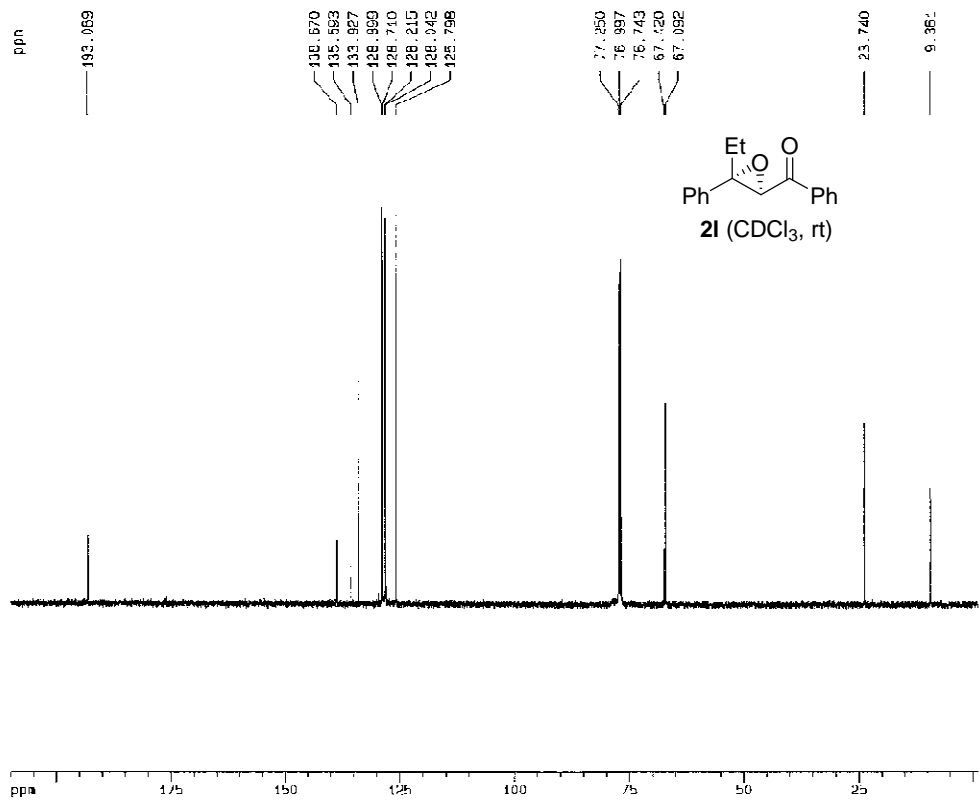

Current Data Parameters  
 NAME 81P58-2-A-ECN  
 EXPNO 1  
 PROCNO 2

F2 - Acquisition Parameters  
 Date\_ 20101219  
 Time 14.45  
 INSTRUM spect  
 PROBRD 5 mm QNP 1H  
 PULPROG zgpg30  
 TD 112780  
 SOLVENT CDCl3  
 NS 240  
 DS 0  
 SWH 37593.684 Hz  
 FIDRES 0.333280 Hz  
 AQ 1.5000240 sec  
 RG 8192  
 EW 13.500 usec  
 DE 7.50 usec  
 TE 300.0 K  
 TS 4.000000000 sec  
 c11 0.039000000 sec

----- CHANNEL f1 -----  
 NUC1 13C  
 P1 8.00 usec  
 PL1 0.00 dB  
 SFO1 125.7671708 MHz

----- CHANNEL f2 -----  
 CPOPRG2 waltz16  
 NUC2 1H  
 PPM2P 96.00 usec  
 PL2 120.00 dB  
 PL32 20.00 dB  
 SFO2 500.1306000 MHz

F2 - Processing parameters  
 SI 32760  
 SF 125.7577550 MHz  
 KDW EM  
 SGB 0  
 LB 1.00 Hz  
 CB 0  
 PC 1.40

1D NMR plot parameters  
 CX 20.00 cm  
 FXP 219.000 ppm  
 F1 25499.13 Hz  
 F2P -1.000 ppm  
 F2 125.76 Hz  
 PPM24 0.56000 ppm/cm  
 HZCM 1305.74469 Hz/cm

Chiral HPLC analysis of compound **2I**

*rac-2I*

Data File: c:\star\10-14-10 6;00;09 am -1.run Run Mode: Analysis  
 Sample ID: BIP58-rac 254nm Peak Measurement: Peak Area  
 Operator (Inj): AS-H PrOH/Hex 10/90 FR1.0 Calibration Level: N/A  
 Injection Date: 10/14/10 06:00:09 AM Run Time (min): 20.587

Injection Method: c:\star\yasuhiro\temporal.y.mth

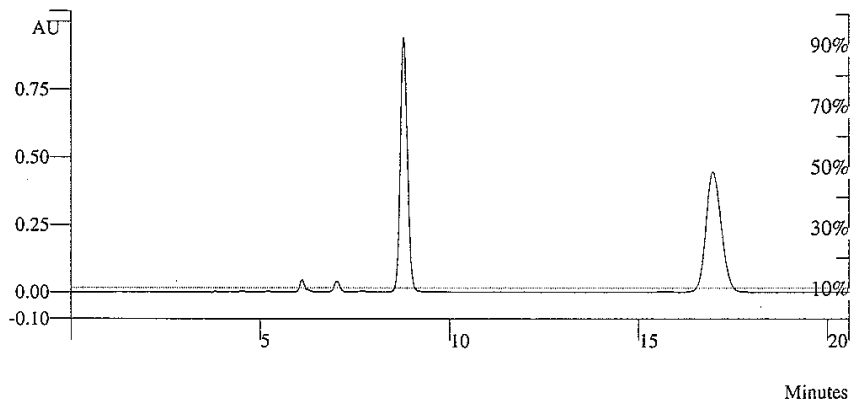

| Peak No | Result () | Ret Time (min)  | Time Offset (min) | Peak Area (counts) | Rel Ret Time | Sep. Code | Width 1/2 (sec) |
|---------|-----------|-----------------|-------------------|--------------------|--------------|-----------|-----------------|
| 1       | 49.5016   | 8.787           | 0.000             | 62768716           | 0.00         | BB        | 12.0            |
| 2       | 50.4984   | 16.947          | 0.000             | 64032712           | 0.00         | BB        | 26.2            |
|         |           | <b>100.0000</b> | <b>0.000</b>      | <b>126801424</b>   |              |           |                 |

*chiral-2I*

Data File: c:\star\10-14-10 7;54;13 am -1.run Run Mode: Analysis  
 Sample ID: BIP58-2-A 254nm Peak Measurement: Peak Area  
 Operator (Inj): AS-H PrOH/Hex 10/90 FR1.0 Calibration Level: N/A  
 Injection Date: 10/14/10 07:54:13 AM Run Time (min): 27.760

Injection Method: c:\star\yasuhiro\temporal.y.mth

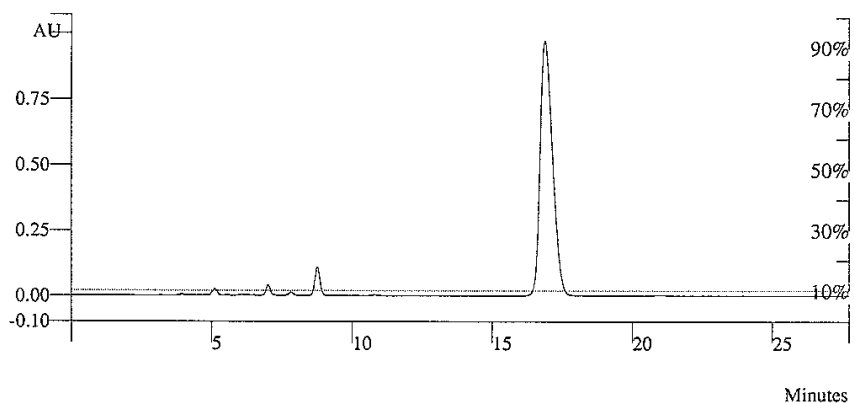

| Peak No | Result () | Ret Time (min)  | Time Offset (min) | Peak Area (counts) | Rel Ret Time | Sep. Code | Width 1/2 (sec) |
|---------|-----------|-----------------|-------------------|--------------------|--------------|-----------|-----------------|
| 1       | 4.1924    | 8.760           | 0.000             | 6712514            | 0.00         | BB        | 11.4            |
| 2       | 95.8076   | 16.867          | 0.000             | 153400800          | 0.00         | BB        | 29.0            |
|         |           | <b>100.0000</b> | <b>0.000</b>      | <b>160113312</b>   |              |           |                 |

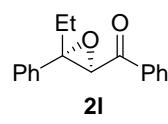

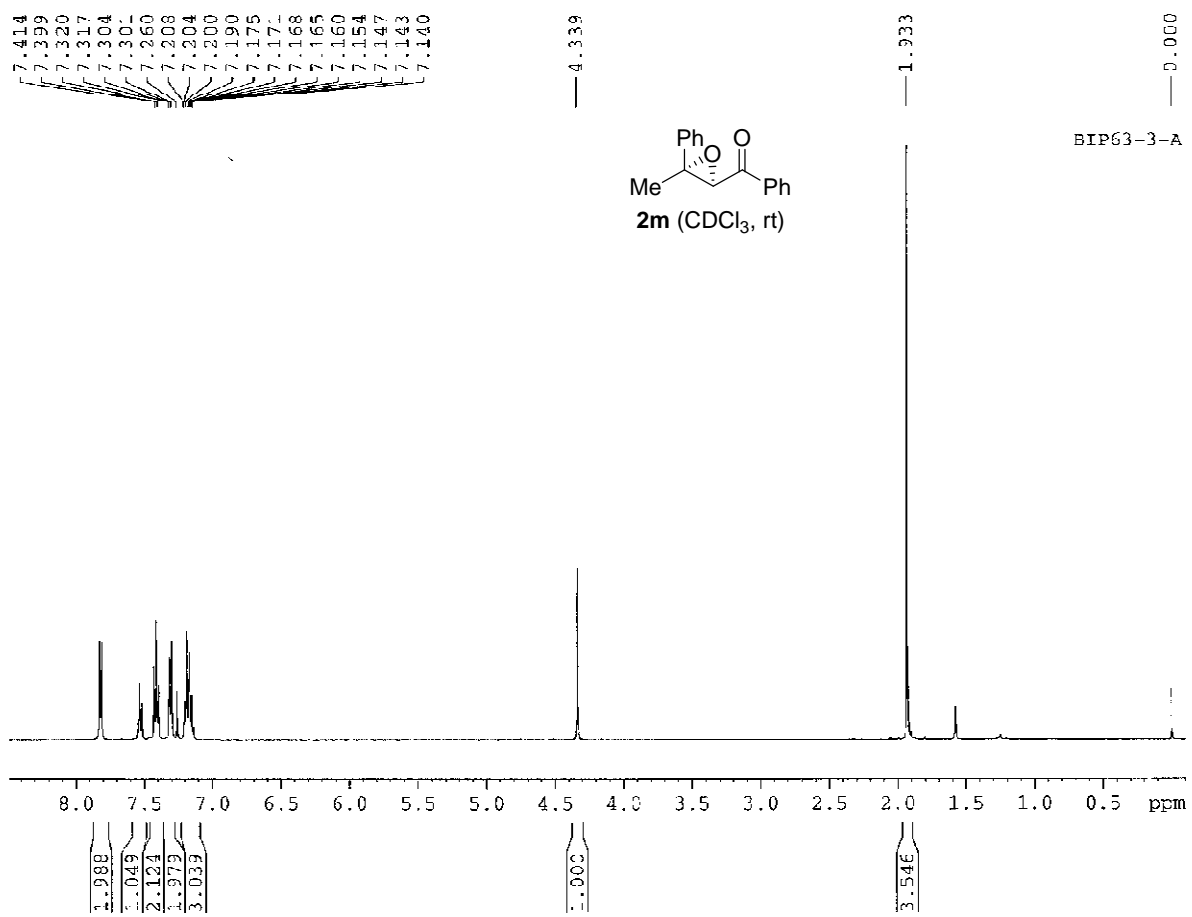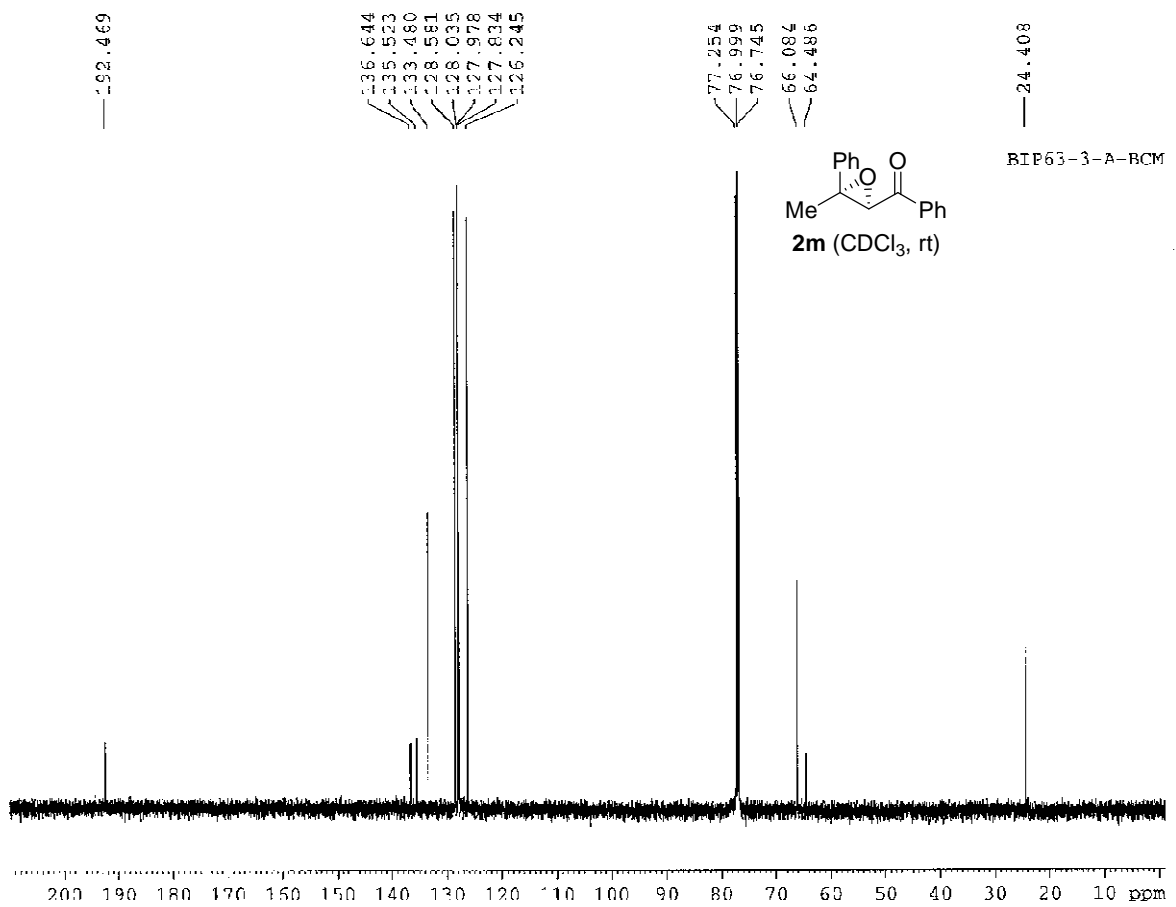

Chiral HPLC analysis of compound **2m**

*rac-2m*

Data File: c:\star\10-26-10 5:31:13 pm -1.run      Run Mode: Analysis  
 Sample ID: BIP63-rac 254nm      Peak Measurement: Peak Area  
 Operator (Inj): AS-H PrOH/Hex 10/90 FR1.0      Calibration Level: N/A  
 Injection Date: 10/26/10 05:31:13 PM      Run Time (min): 55.707

Injection Method: c:\star\yasuhiro\temporal.y.mth

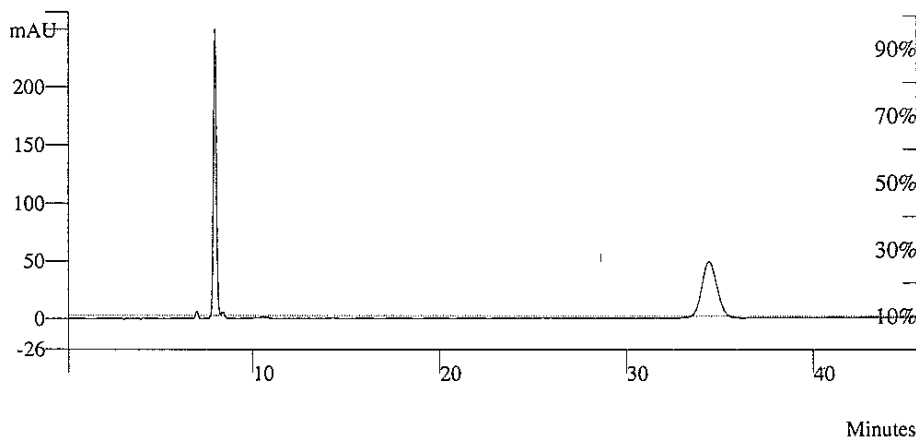

| Peak No | Result () | Ret Time (min) | Time Offset (min) | Peak Area (counts) | Rel Ret Time | Sep. Code | Width 1/2 (sec) |
|---------|-----------|----------------|-------------------|--------------------|--------------|-----------|-----------------|
| 1       | 50.5427   | 7.987          | 0.000             | 14354109           | 0.00         | BB        | 10.1            |
| 2       | 49.4573   | 34.387         | 0.000             | 14045867           | 0.00         | BB        | 52.6            |
|         |           |                | <b>0.000</b>      | <b>28399976</b>    |              |           |                 |

*chiral-2m*

Data File: c:\star\10-28-10 3:19:07 pm -1.run      Run Mode: Analysis  
 Sample ID: BIP63-2-A 254nm      Peak Measurement: Peak Area  
 Operator (Inj):      Calibration Level: N/A  
 Injection Date: 10/28/10 03:19:07 PM      Run Time (min): 41.093

Injection Method: c:\star\yasuhiro\temporal.y.mth

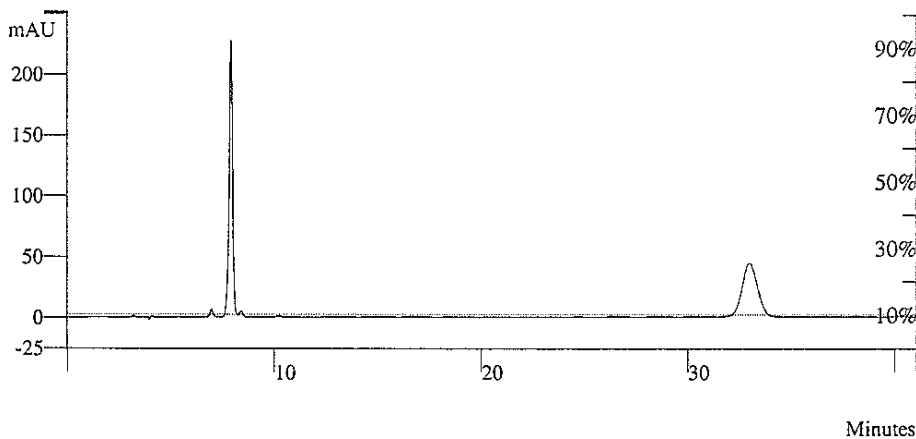

| Peak No | Result () | Ret Time (min) | Time Offset (min) | Peak Area (counts) | Rel Ret Time | Sep. Code | Width 1/2 (sec) |
|---------|-----------|----------------|-------------------|--------------------|--------------|-----------|-----------------|
| 1       | 52.8417   | 7.907          | 0.000             | 13132324           | 0.00         | BB        | 10.1            |
| 2       | 47.1582   | 32.973         | 0.000             | 11719851           | 0.00         | BB        | 48.3            |
|         |           |                | <b>0.000</b>      | <b>24852176</b>    |              |           |                 |

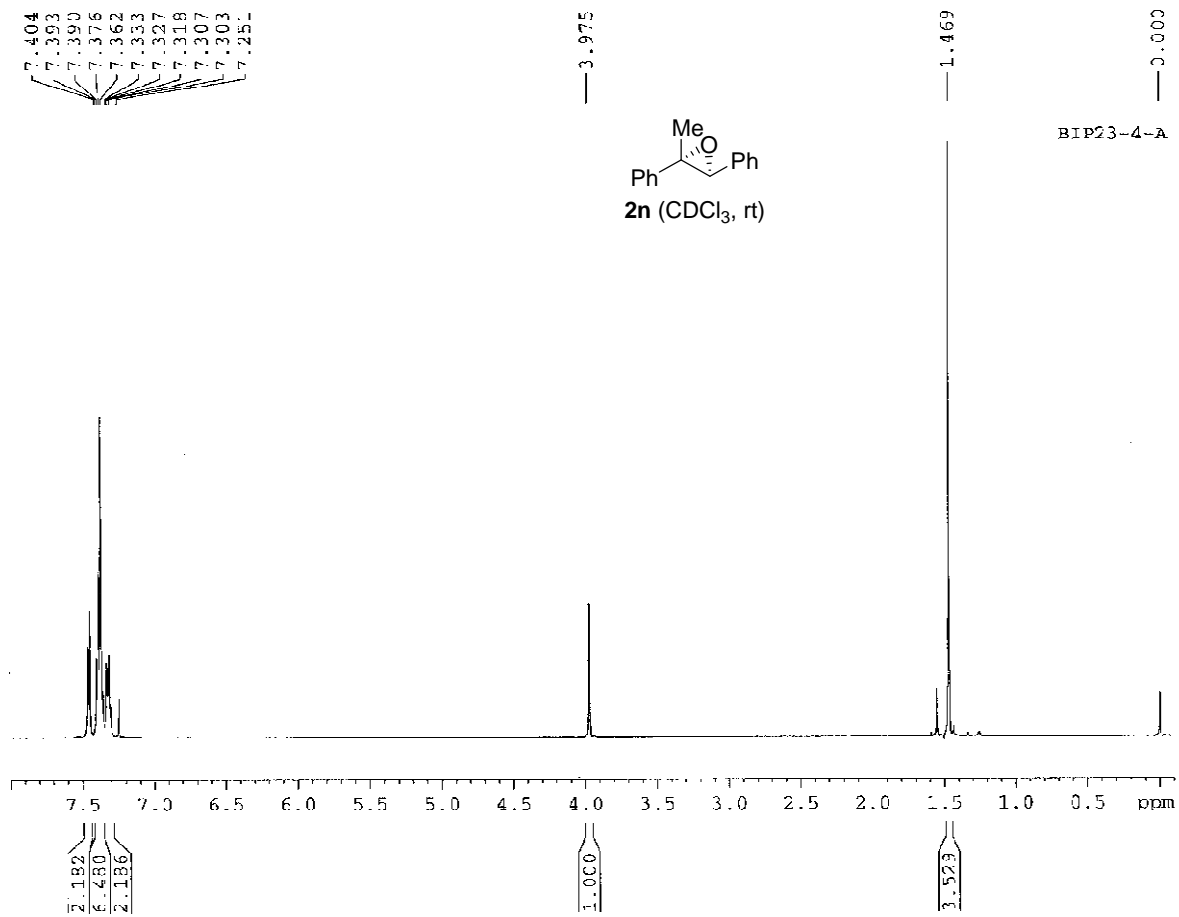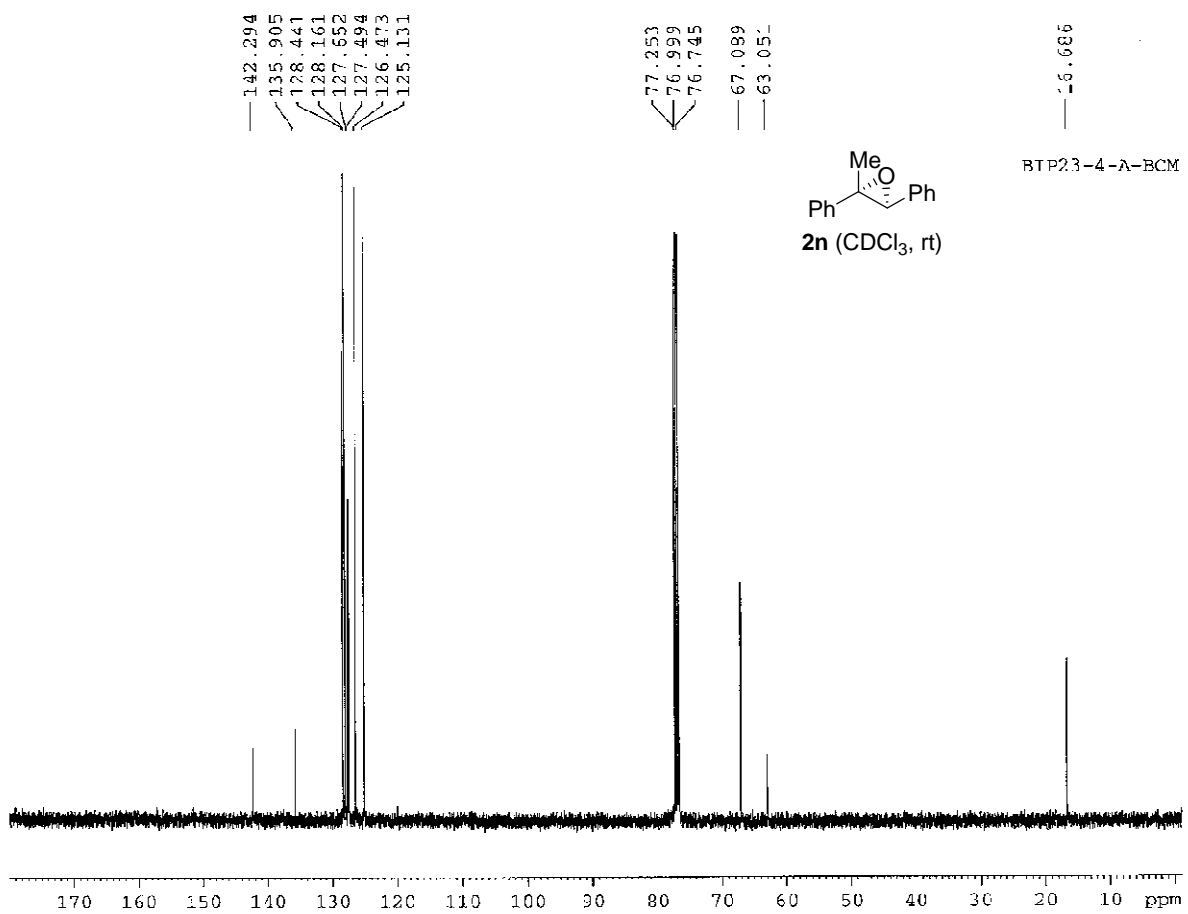



Chiral HPLC analysis of compound **2n**

*rac-2n*

Data File: c:\star\4-8-11 6;47;14 pm -1.run Run Mode: Analysis  
 Sample ID: BIP23-rac 225nm Peak Measurement: Peak Area  
 Operator (Inj): OD-H PrOH/Hex 3/97 FR1.0 Calibration Level: N/A  
 Injection Date: 04/08/11 06:47:14 PM Run Time (min): 18.240

Injection Method: c:\star\yasuhiro\temporaly.mth

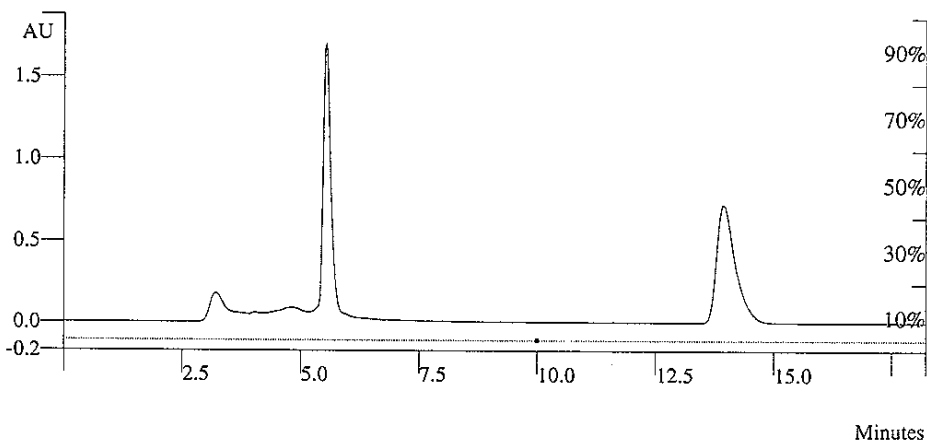

| Peak No | Result () | Ret Time (min)  | Time Offset (min) | Peak Area (counts) | Rel Ret Time | Sep. Code | Width 1/2 (sec) |
|---------|-----------|-----------------|-------------------|--------------------|--------------|-----------|-----------------|
| 1       | 49.3615   | 5.533           | 0.000             | 95956504           | 0.00         | BB        | 10.0            |
| 2       | 50.6385   | 13.933          | 0.000             | 98439104           | 0.00         | BB        | 24.7            |
|         |           | <b>100.0000</b> | <b>0.000</b>      | <b>194395616</b>   |              |           |                 |

*chiral-2n*

Data File: c:\star\4-8-11 6;26;14 pm -1.run Run Mode: Analysis  
 Sample ID: BIP23-4-A 225nm Peak Measurement: Peak Area  
 Operator (Inj): OD-H PrOH/Hex 3/97 FR1.0 Calibration Level: N/A  
 Injection Date: 04/08/11 06:26:14 PM Run Time (min): 18.160

Injection Method: c:\star\yasuhiro\temporaly.mth

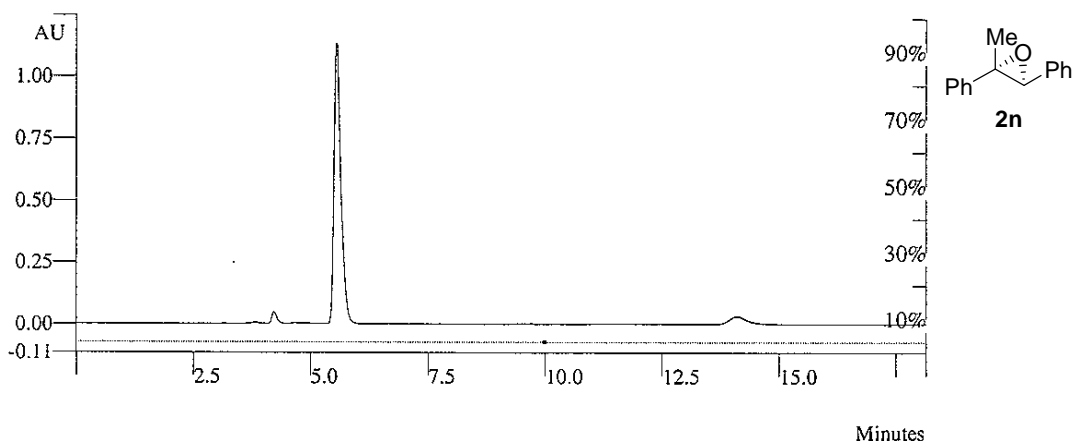

| Peak No | Result () | Ret Time (min)  | Time Offset (min) | Peak Area (counts) | Rel Ret Time | Sep. Code | Width 1/2 (sec) |
|---------|-----------|-----------------|-------------------|--------------------|--------------|-----------|-----------------|
| 1       | 93.4815   | 5.533           | 0.000             | 59468072           | 0.00         | BB        | 9.1             |
| 2       | 6.5185    | 14.093          | 0.000             | 4146707            | 0.00         | BB        | 23.0            |
|         |           | <b>100.0000</b> | <b>0.000</b>      | <b>63614780</b>    |              |           |                 |

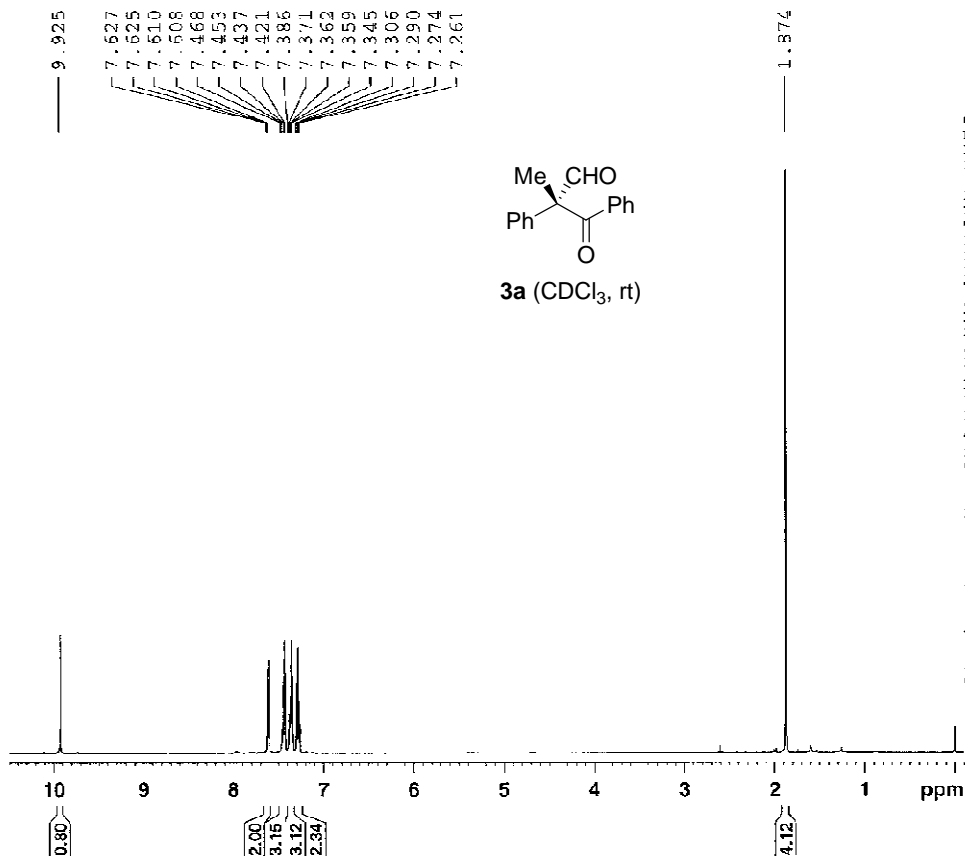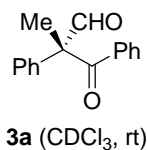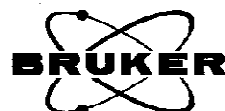

Current Data Parameters  
NAME BIP84-1-A  
EXPNO 1  
PROCNO 1

F2 - Acquisition Parameters  
Date\_ 20110117  
Time 15.11  
INSTRUM spect  
PROBHD 5 mm PABBI 1H/  
PULPROG zg  
TD 59998  
SOLVENT CDCl3  
NS 8  
DS 0  
SWH 10000.000 Hz  
FIDRES 0.156672 Hz  
AQ 2.9999499 sec  
RG 57  
DA 50.000 usec  
DE 7.50 usec  
TE 294.4 K  
D1 1.00000000 sec  
TEU 1

===== CHANNEL f1 =====  
NUC1 1H  
P1 5.35 usec  
PL1 0.00 dB  
SFO1 499.8729992 MHz

F2 - Processing parameters  
SI 32768  
SF 499.8730172 MHz  
WDW EM  
SSB 0  
LB 0.30 Hz  
GB 0  
HC 1.00

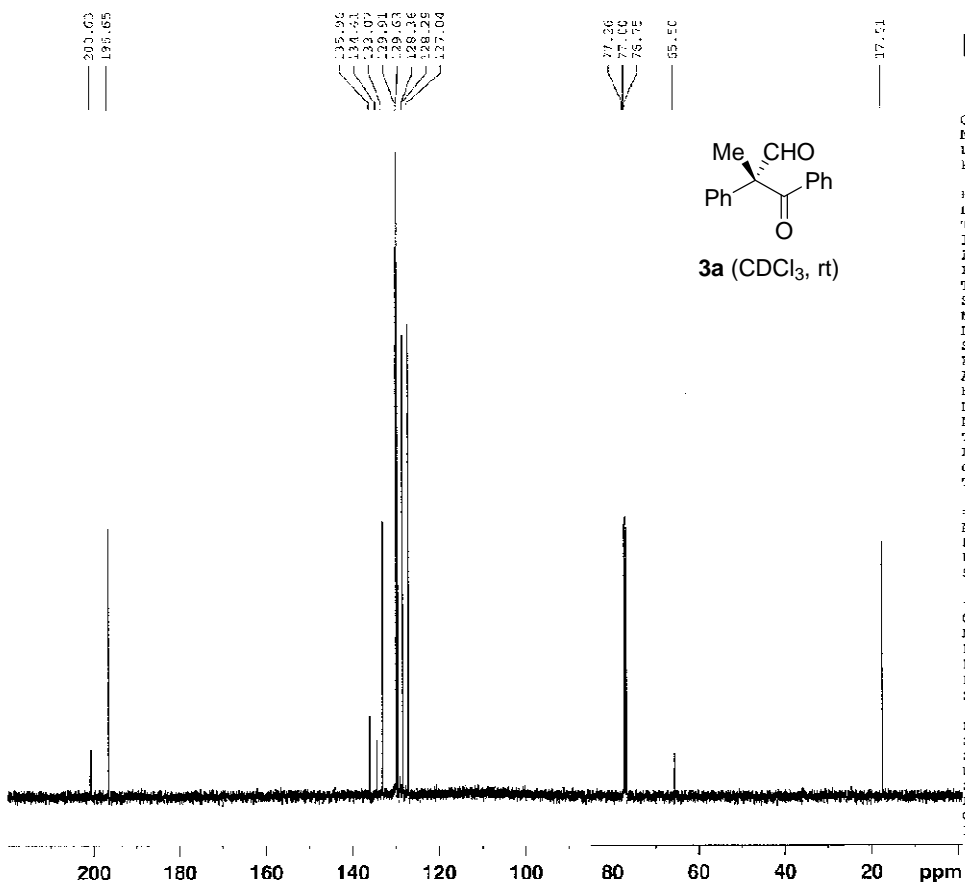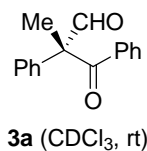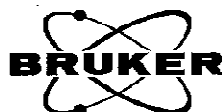

Current Data Parameters  
NAME BIP84-1-A-BCM1  
EXPNO 1  
PROCNO 1

F2 - Acquisition Parameters  
Date\_ 20110117  
Time 22.50  
INSTRUM spect  
PROBHD 5 mm PABBI 1H/  
PULPROG zgpgc  
TD 136360  
SOLVENT CDCl3  
NS 400  
DS 0  
SWH 17593.984 Hz  
FIDRES 0.275637 Hz  
AQ 1.8136380 sec  
RG 18390.4  
DW 13.300 usec  
DE 7.50 usec  
TE 300.0 K  
D1 2.00000000 sec  
d11 0.03000000 sec  
TDO 1

===== CHANNEL f1 =====  
NUC1 13C  
P1 12.00 usec  
PL1 3.00 dB  
SFO1 125.7024664 MHz

===== CHANNEL f2 =====  
CPDPRG2 waltz16  
NUC2 1H  
PCPD2 90.00 usec  
PL2 0.00 dB  
PL12 28.00 dB  
SFO2 499.9734991 MHz

F2 - Processing parameters  
SI 32768  
SF 125.5924181 MHz  
WDW FM  
SSB 0  
LB 1.00 Hz  
GB 0  
PC 1.40

Chiral HPLC analysis of compound **3a**

*rac*-**3a**

Data File: c:\star\1-25-11 11:29:22 am -1.run Run Mode: Analysis  
 Sample ID: BIP84-rac 254nm Peak Measurement: Peak Area  
 Operator (Inj): AS-H PrOH/Hex 5/95 FR1.0 Calibration Level: N/A  
 Injection Date: 01/25/11 11:29:22 AM Run Time (min): 21.547

Injection Method: c:\star\yasuhiro\temporal.y.mth

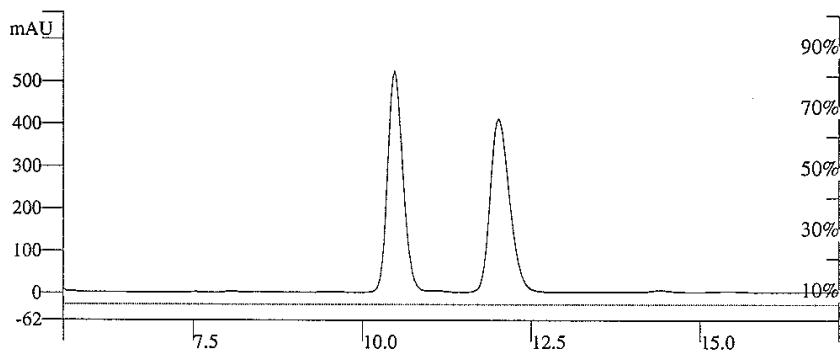

| Peak No | Result () | Ret Time (min)  | Time Offset (min) | Peak Area (counts) | Rel Ret Time | Sep. Code | Width 1/2 (sec) |
|---------|-----------|-----------------|-------------------|--------------------|--------------|-----------|-----------------|
| 1       | 49.7899   | 10.467          | 0.000             | 41413496           | 0.00         | BB        | 14.5            |
| 2       | 50.2101   | 12.013          | 0.000             | 41763036           | 0.00         | BB        | 18.5            |
|         |           | <b>100.0000</b> | <b>0.000</b>      | <b>83176528</b>    |              |           |                 |

chiral-**3a**

Data File: c:\star\1-25-11 2:48:56 pm -1.run Run Mode: Analysis  
 Sample ID: BIP84-1-A 254nm Peak Measurement: Peak Area  
 Operator (Inj): AS-H PrOH/Hex 5/95 FR1.0 Calibration Level: N/A  
 Injection Date: 01/25/11 02:48:56 PM Run Time (min): 18.907

Injection Method: c:\star\yasuhiro\temporal.y.mth

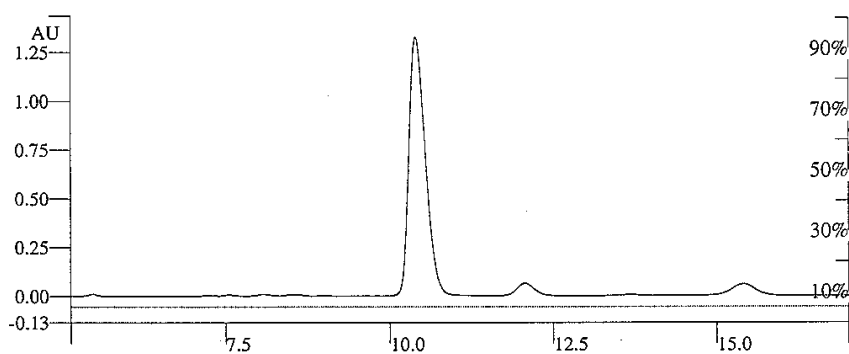

| Peak No | Result () | Ret Time (min)  | Time Offset (min) | Peak Area (counts) | Rel Ret Time | Sep. Code | Width 1/2 (sec) |
|---------|-----------|-----------------|-------------------|--------------------|--------------|-----------|-----------------|
| 1       | 95.2032   | 10.387          | 0.000             | 117952592          | 0.00         | BB        | 16.3            |
| 2       | 4.7968    | 12.067          | 0.000             | 5943005            | 0.00         | BB        | 16.9            |
|         |           | <b>100.0000</b> | <b>0.000</b>      | <b>123895600</b>   |              |           |                 |

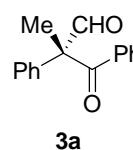

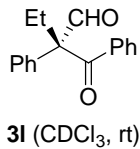

BIP85-2-A1

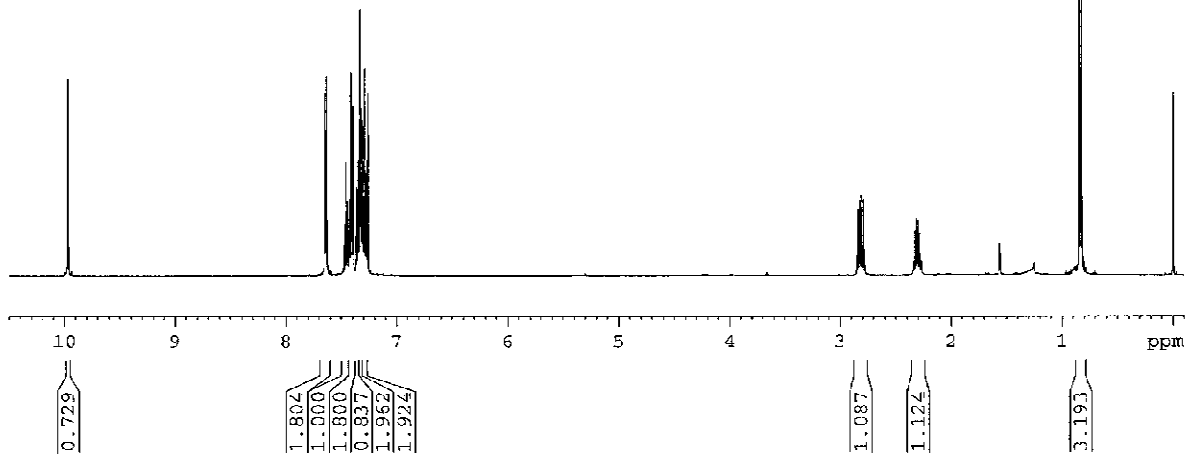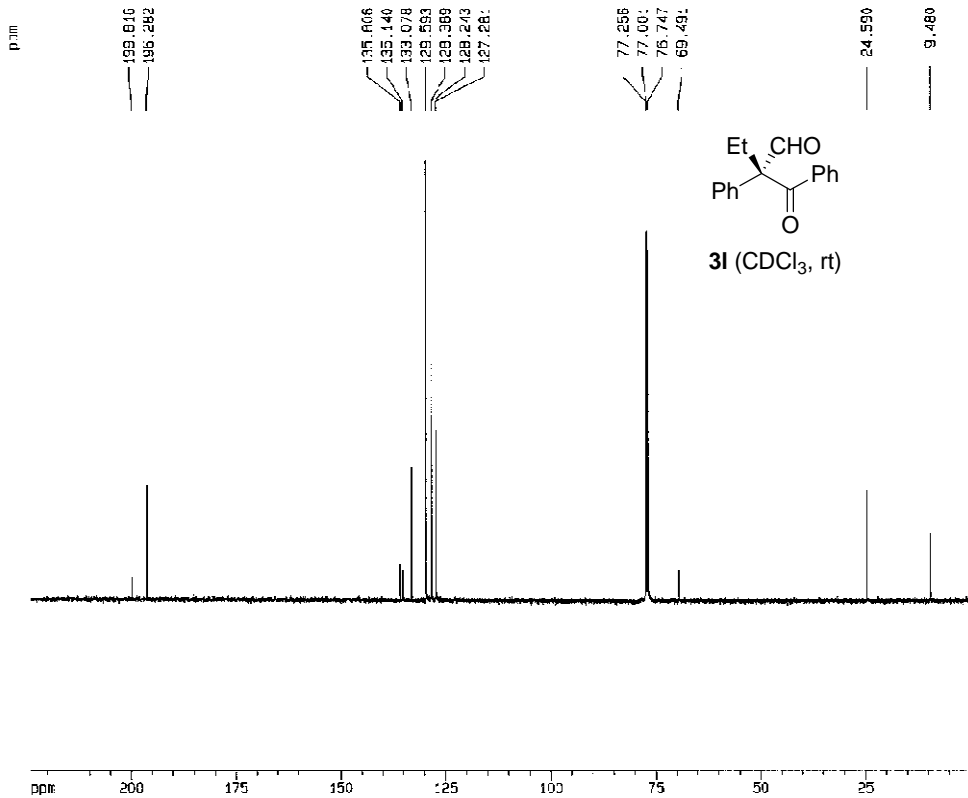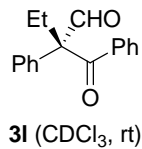

Current Data Parameters

NAME BIP85-2-A1-8CM  
 EXPNO 1  
 PROCNO 2  
 F2 - Acquisition Parameters  
 Date\_ 20110125  
 Time 18.37  
 INSTRUM spect  
 PROBNM 5 mm QNP 1H  
 PULPROG zgpg30  
 TD 132780  
 SOLVENT CDCl3  
 NS 400  
 DS 0  
 SFR 3750.804 Hz  
 FIDRES 0.333333 Hz  
 AQ 1.5800243 sec  
 RG 8192  
 DN 13.360 usec  
 DC 7.50 usec  
 EL 300.0 K  
 TH 4.0000000 sec  
 DT1 0.0000000 sec

===== CHANNEL f1 =====

NUC1 13C  
 P1 8.00 usec  
 PL1 1.01 dB  
 SFO1 125.761403 MHz

===== CHANNEL f2 =====

CPDPRG2 waltz16  
 NUC2 1H  
 P2 14  
 PL2 90.00 usec  
 PL12 120.00 dB  
 PL13 20.00 dB  
 SFO2 500.138000 MHz

F2 - Processing parameters

SF 32750  
 HF 125.7577927 MHz  
 WDW EM  
 SSB 0  
 LB 1.00 Hz  
 GB 0  
 PC 1.40

1D NMR plot parameters

CK 20.00 cm  
 F1P 230.000 ppr  
 F1 28024.20 Hz  
 F2P -1.000 ppr  
 F2 -125.76 Hz  
 PPMCH 11.55000 ppr/cm  
 HZCH 1432.50292 Hz/cm

# Chiral HPLC analysis of compound **3I**

*rac*-**3I**

Data File: c:\star\1-25-11 3;12;47 pm -1.run      Run Mode: Analysis  
 Sample ID: BIP85-rac 254nm      Peak Measurement: Peak Area  
 Operator (Inj): AS-H PrOH/Hex 5/95 FR1.0      Calibration Level: N/A  
 Injection Date: 01/25/11 03:12:47 PM      Run Time (min): 15.627

Injection Method: c:\star\yasuhiro\temporal.y.mth

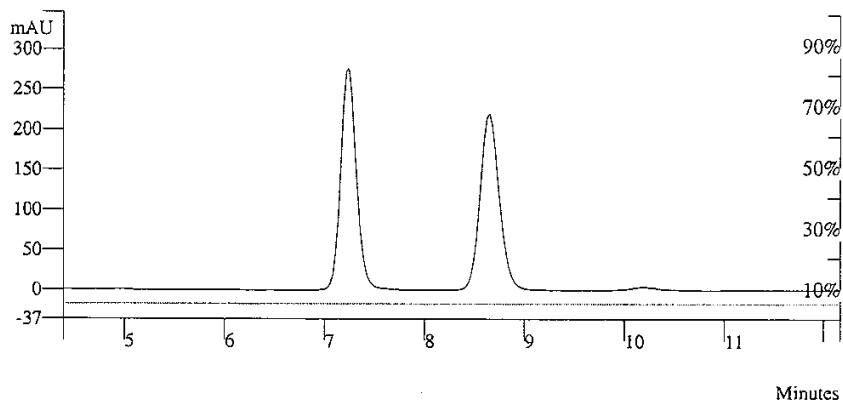

| Peak No | Result () | Ret Time (min)  | Time Offset (min) | Peak Area (counts) | Rel Ret Time | Sep. Code | Width 1/2 (sec) |
|---------|-----------|-----------------|-------------------|--------------------|--------------|-----------|-----------------|
| 1       | 50.5380   | 7.240           | 0.000             | 15176258           | 0.00         | BB        | 9.8             |
| 2       | 49.4620   | 8.653           | 0.000             | 14853138           | 0.00         | BB        | 12.1            |
|         |           | <b>100.0000</b> | <b>0.000</b>      | <b>30029396</b>    |              |           |                 |

chiral-**3I**

Data File: c:\star\1-25-11 3;36;31 pm -1.run      Run Mode: Analysis  
 Sample ID: BIP85-2-A 254nm      Peak Measurement: Peak Area  
 Operator (Inj):      Calibration Level: N/A  
 Injection Date: 01/25/11 03:36:31 PM      Run Time (min): 13.067

Injection Method: c:\star\yasuhiro\temporal.y.mth

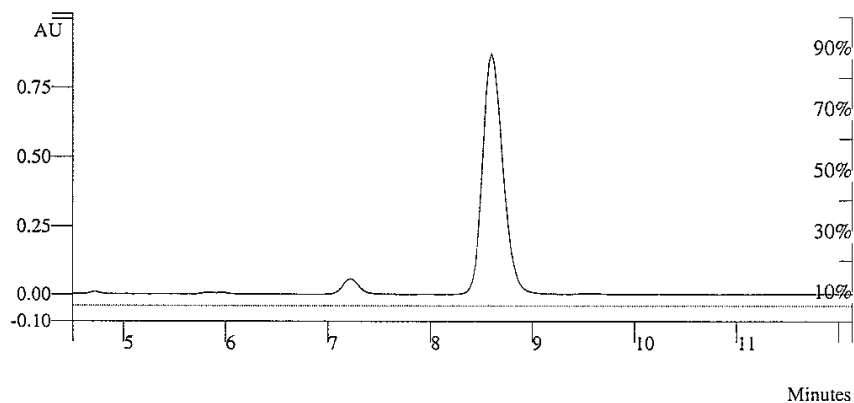

| Peak No | Result () | Ret Time (min)  | Time Offset (min) | Peak Area (counts) | Rel Ret Time | Sep. Code | Width 1/2 (sec) |
|---------|-----------|-----------------|-------------------|--------------------|--------------|-----------|-----------------|
| 1       | 4.8491    | 7.213           | 0.000             | 3153613            | 0.00         | BB        | 10.0            |
| 2       | 95.1509   | 8.600           | 0.000             | 61880960           | 0.00         | BB        | 12.8            |
|         |           | <b>100.0000</b> | <b>0.000</b>      | <b>65034572</b>    |              |           |                 |

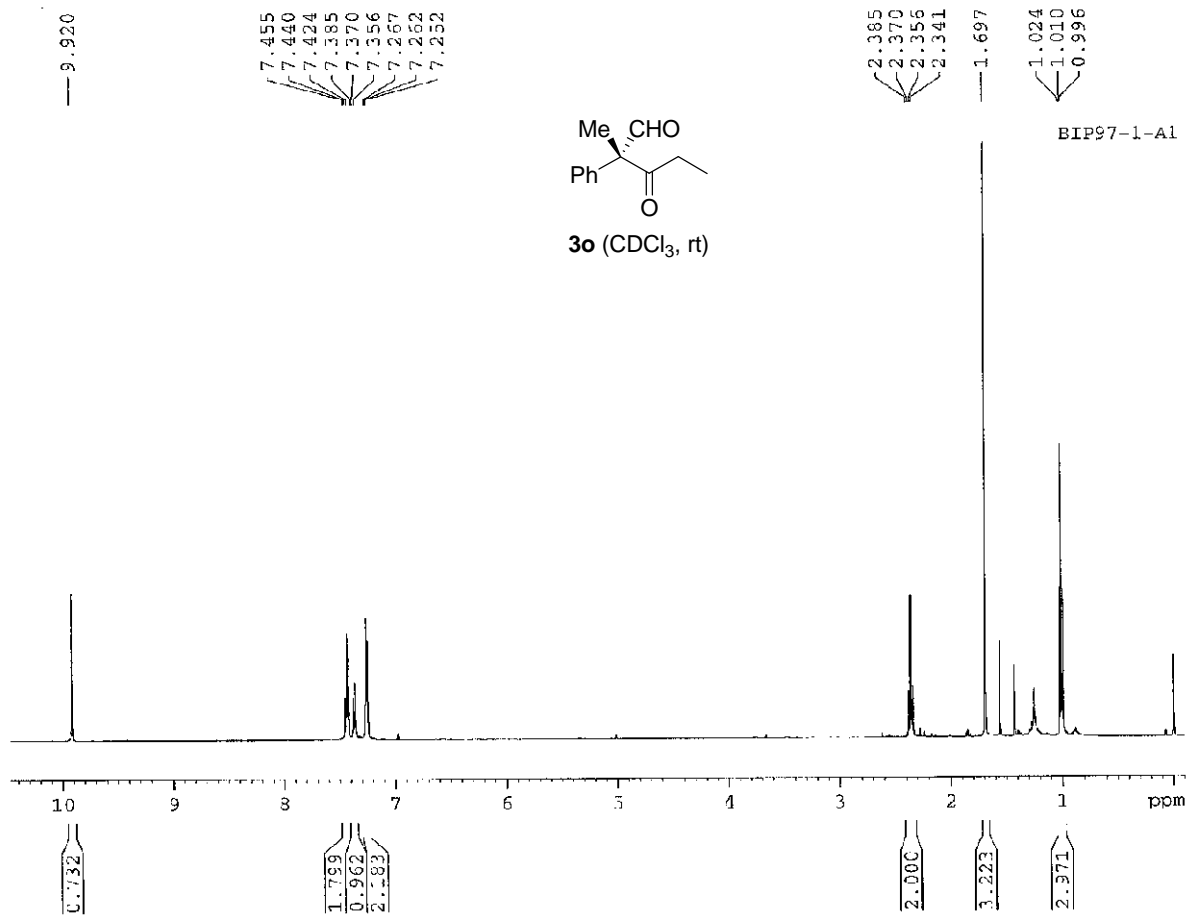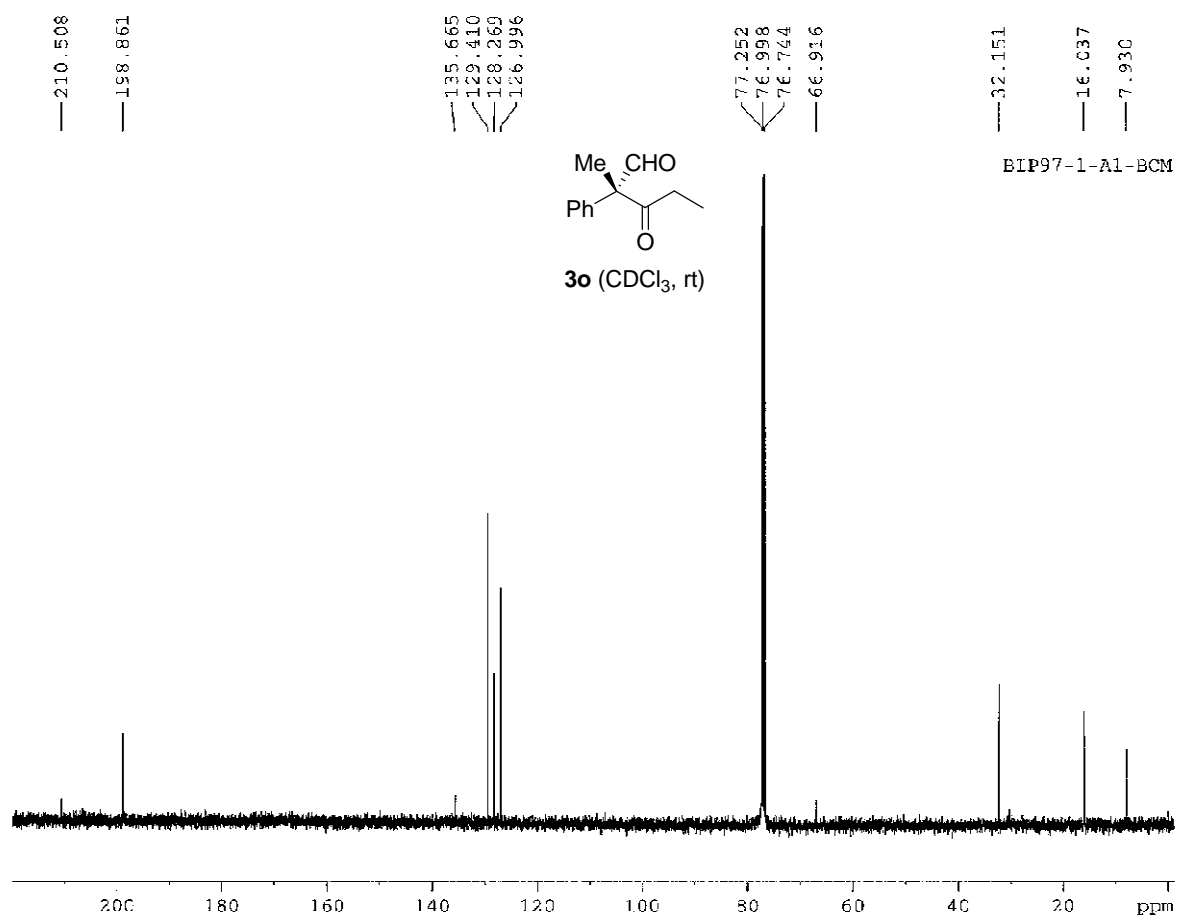

Chiral HPLC analysis of compound **3o**

*rac*-**3o**

Data File: c:\star\4-15-11 10:52:21 am -1.run  
 Sample ID: BIP-S108-rac 210nm  
 Operator (Inj): AS-H PrOH/Hex 5/95 FR1.0  
 Injection Date: 04/15/11 10:52:21 AM

Run Mode: Analysis  
 Peak Measurement: Peak Area  
 Calibration Level: N/A  
 Run Time (min): 31.627

Injection Method: c:\star\yasuhiro\temporal.y.mth

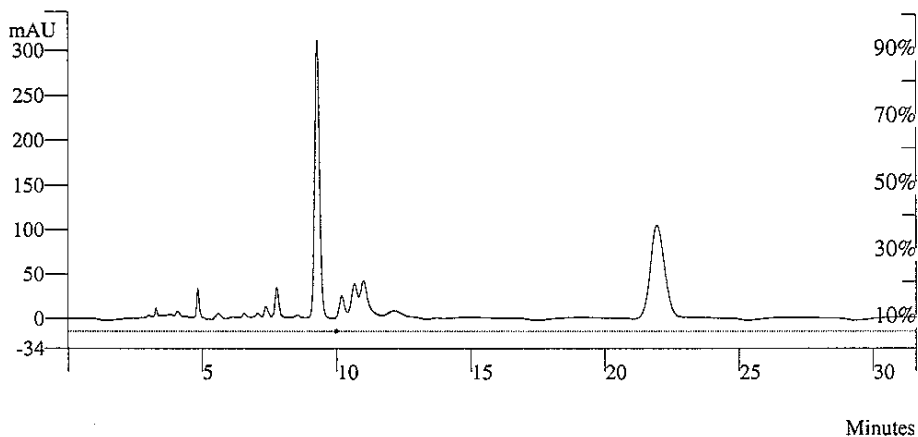

| Peak No | Result () | Ret Time (min)  | Time Offset (min) | Peak Area (counts) | Rel Ret Time | Sep. Code | Width 1/2 (sec) |
|---------|-----------|-----------------|-------------------|--------------------|--------------|-----------|-----------------|
| 1       | 50.4974   | 9.267           | 0.000             | 19984194           | 0.00         | BB        | 11.5            |
| 2       | 49.5026   | 21.933          | 0.000             | 19590520           | 0.00         | BB        | 34.1            |
|         |           | <b>100.0000</b> | <b>0.000</b>      | <b>39574712</b>    |              |           |                 |

*chiral*-**3o**

Data File: c:\star\4-19-11 9:54:49 am -1.run  
 Sample ID: BIP97-3-A 210nm  
 Operator (Inj):  
 Injection Date: 04/19/11 09:54:49 AM

Run Mode: Analysis  
 Peak Measurement: Peak Area  
 Calibration Level: N/A  
 Run Time (min): 30.080

Injection Method: c:\star\yasuhiro\temporal.y.mth

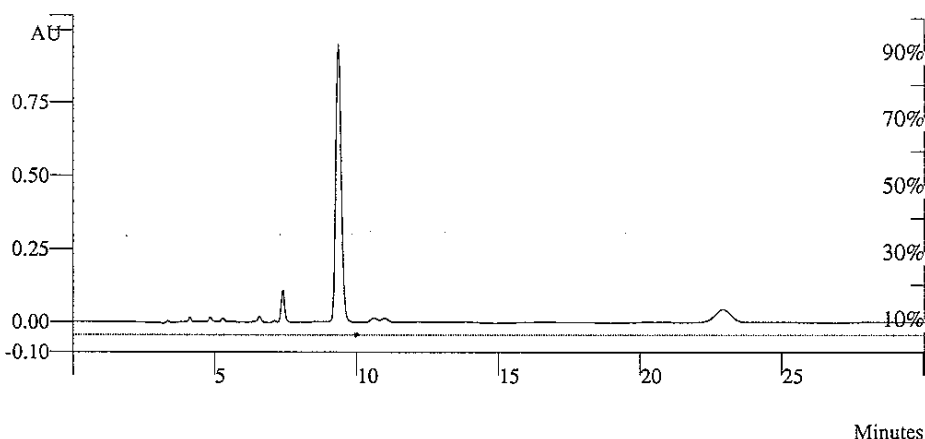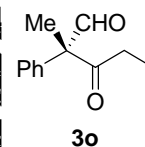

| Peak No | Result () | Ret Time (min)  | Time Offset (min) | Peak Area (counts) | Rel Ret Time | Sep. Code | Width 1/2 (sec) |
|---------|-----------|-----------------|-------------------|--------------------|--------------|-----------|-----------------|
| 1       | 88.7151   | 9.347           | 0.000             | 65603192           | 0.00         | BB        | 12.5            |
| 2       | 11.2849   | 22.920          | 0.000             | 8344957            | 0.00         | BB        | 35.3            |
|         |           | <b>100.0000</b> | <b>0.000</b>      | <b>73948152</b>    |              |           |                 |

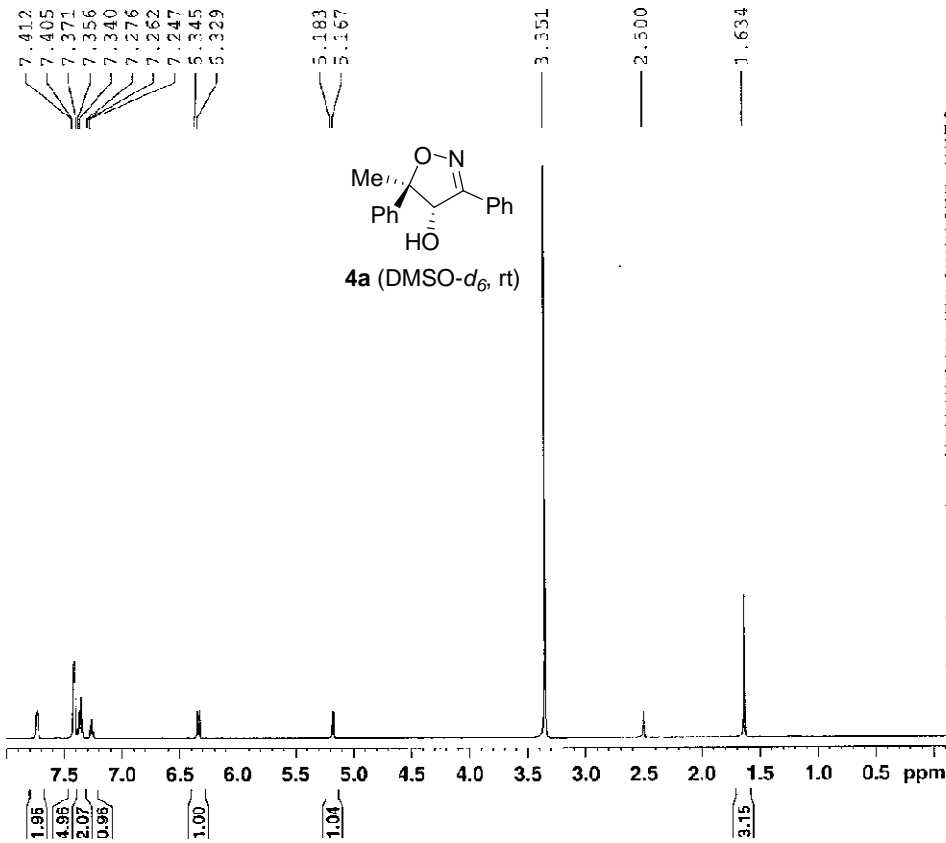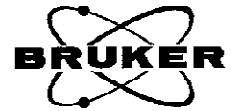

Current Data Parameters  
 NAME BIP98-2-A1-DMSO  
 EXPNO 1  
 PROCNO 1

PS Acquisition Parameters  
 Date\_ 20110425  
 Time 17.55  
 INSTRUM spect  
 PROBHD 5 mm PABEI 1H/  
 POLPROG zg  
 TD 59998  
 SOLVENT DMSO  
 NS 16  
 DS 0  
 SWH 10000.000 Hz  
 FIDRES 0.166572 Hz  
 AQ 2.959499 sec  
 RG 114  
 CA 50.000 usec  
 CK 7.50 usec  
 TE 295.0 K  
 DL 1.0000000 sec  
 TEO 1

===== CHANNEL f1 =====  
 NUCL 1H  
 P1 5.35 usec  
 PL1 0.00 dB  
 SFO1 499.8729992 MHz

F2 - Processing parameters  
 SI 32768  
 SF 499.8700170 MHz  
 XWD KM  
 SSR 0  
 LB 0.30 Hz  
 GB 0  
 PC 1.00

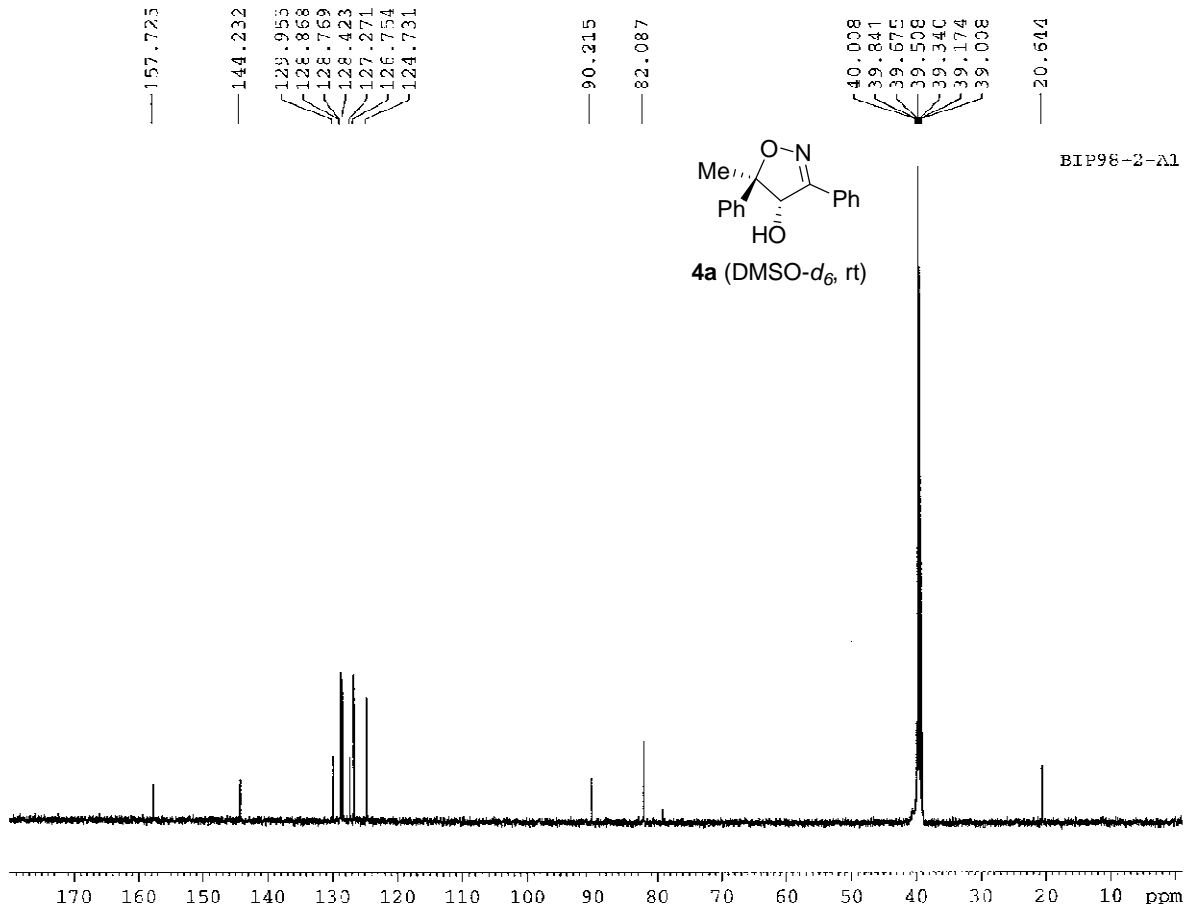

BIP98-2-A1



Chiral HPLC analysis of compound **4a**

*rac-4a*

Data File: c:\star\4-19-11 6;38;34 pm -1.run      Run Mode: Analysis  
 Sample ID: BIP98-rac 254nm      Peak Measurement: Peak Area  
 Operator (Inj): AS-H PrOH/Hex 10/90 FR1.0      Calibration Level: N/A  
 Injection Date: 04/19/11 06:38:34 PM      Run Time (min): 18.560

Injection Method: c:\star\yasuhiro\temporal.y.mth

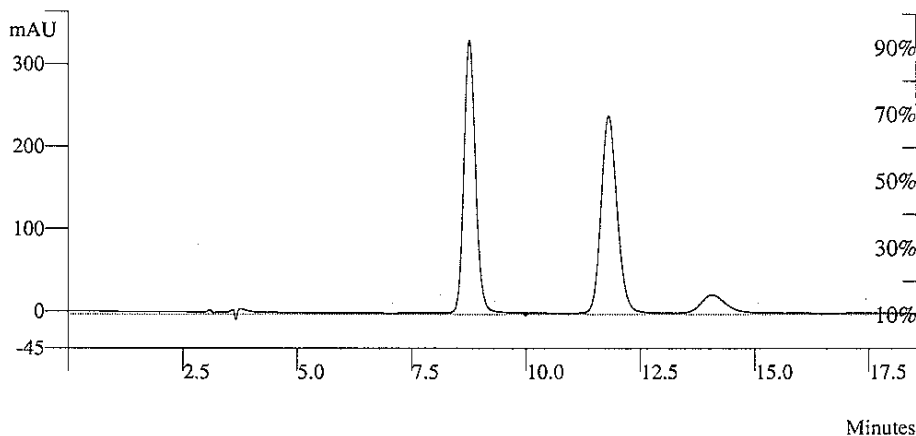

| Peak No | Result () | Ret Time (min) | Time Offset (min) | Peak Area (counts) | Rel Ret Time | Sep. Code | Width 1/2 (sec) |
|---------|-----------|----------------|-------------------|--------------------|--------------|-----------|-----------------|
| 1       | 49.9045   | 8.760          | 0.000             | 29551020           | 0.00         | BB        | 16.0            |
| 2       | 50.0955   | 11.800         | 0.000             | 29664082           | 0.00         | BB        | 22.5            |
|         |           |                | <b>100.0000</b>   | <b>0.000</b>       |              |           |                 |
|         |           |                |                   | <b>59215104</b>    |              |           |                 |

*chiral-4a*

Data File: c:\star\4-19-11 7;23;25 pm -1.run      Run Mode: Analysis  
 Sample ID: BIP98-2-A 254nm      Peak Measurement: Peak Area  
 Operator (Inj):      Calibration Level: N/A  
 Injection Date: 04/19/11 07:23:25 PM      Run Time (min): 20.640

Injection Method: c:\star\yasuhiro\temporal.y.mth

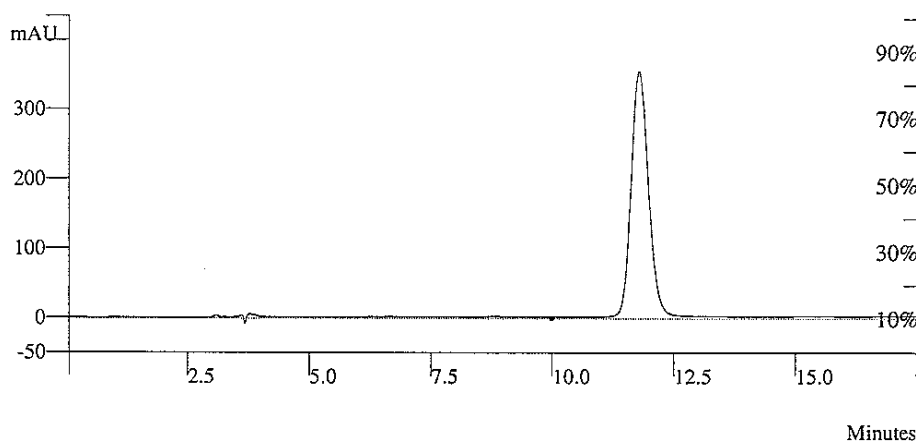

| Peak No | Result () | Ret Time (min) | Time Offset (min) | Peak Area (counts) | Rel Ret Time | Sep. Code | Width 1/2 (sec) |
|---------|-----------|----------------|-------------------|--------------------|--------------|-----------|-----------------|
| 1       | 0.1278    | 8.787          | 0.000             | 56742              | 0.00         | BB        | 17.4            |
| 2       | 99.8722   | 11.773         | 0.000             | 44351980           | 0.00         | BB        | 22.7            |
|         |           |                | <b>100.0000</b>   | <b>0.000</b>       |              |           |                 |
|         |           |                |                   | <b>44408720</b>    |              |           |                 |

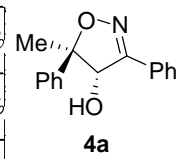

Supplement: NIHMS297160-supplement-2_si_002.pdf [file NIHMS297160-supplement-2_si_002.pdf]
